# Supplementary material
Source: PubMed Central journal article supplement (PMC3536156)
Supplement: IAI.00919-12_zii999099955so1.pdf [file IAI.00919-12_zii999099955so1.pdf]

Supplemental Table 2: Gene changes at 60 minutes in adherent versus non-adherent samples

| Affy_ID          | Fold change | p-value     | Realtime change      | Annotation                                                                                                                                             | Derivation of annotation |
|------------------|-------------|-------------|----------------------|--------------------------------------------------------------------------------------------------------------------------------------------------------|--------------------------|
| A4052_s_at       | 4.313332633 | 0.024012538 | Increase_in_Adherent | trpE; anthranilate synthase component I (EC:4.1.3.27); K01657 anthranilate synthase component I [EC:4.1.3.27]                                          | ecw:EcE24377A_1463       |
| V1799_s_at       | 3.972247924 | 0.033307448 | Increase_in_Adherent | hscB; co-chaperone HscB ; K04082 molecular chaperone HscB                                                                                              | sdv:SDY_2723             |
| V0231_s_at       | 3.95580421  | 0.000284517 | Increase_in_Adherent | ssb; single-stranded DNA-binding protein ; K03111 single-strand DNA-binding protein                                                                    | sdv:SDY_4508             |
| SB5_0275_s_at    | 3.893614168 | 1.07E-05    | Increase_in_Adherent | hypothetical protein ; K02040 phosphate transport system substrate-binding protein                                                                     | sbo:SBO_3421             |
| K3820_x_at       | 3.763692747 | 7.60E-05    | Increase_in_Adherent | putative holin protein                                                                                                                                 | eqj:EC026_3693           |
| O2CoV121_at      | 3.647435418 | 2.22E-05    | Increase_in_Adherent | NO_KEGG_DATA                                                                                                                                           | NO_KEGG_DATA             |
| SD1_2456_x_at    | 3.566304619 | 0.015156769 | Increase_in_Adherent | putative fructose-like phosphotransferase EIIB subunit 3 ; K11202 PTS system, fructose-specific IIB-like component [EC:2.7.1.69]                       | sbv:SbBS512_E4440        |
| SDY_4180_x_at    | 3.540687986 | 4.18E-05    | Increase_in_Adherent | NO_KEGG_DATA                                                                                                                                           | NO_KEGG_DATA             |
| D1328_s_at       | 3.533442346 | 0.004222188 | Increase_in_Adherent | NO_KEGG_DATA                                                                                                                                           | NO_KEGG_DATA             |
| A0552_s_at       | 3.51323466  | 0.019815913 | Increase_in_Adherent | hscB; co-chaperone HscB ; K04082 molecular chaperone HscB                                                                                              | sdv:SDY_2723             |
| b3350_s_at       | 3.455476842 | 0.000165312 | Increase_in_Adherent | NO_KEGG_DATA                                                                                                                                           | NO_KEGG_DATA             |
| V0624_x_at       | 3.388319399 | 0.000108353 | Increase_in_Adherent | hypothetical protein ; K05521 ADP-ribosylglycohydrolase [EC:3.2.-.]                                                                                    | sdv:SDY_2272             |
| EC869_7614_x_at  | 3.35904693  | 0.000329902 | Increase_in_Adherent | iron-containing alcohol dehydrogenase ; K08317 putative oxidoreductase [EC:1.1.-.]                                                                     | dze:Dd1591_2414          |
| V6086_s_at       | 3.350223296 | 1.94E-05    | Increase_in_Adherent | NO_KEGG_DATA                                                                                                                                           | NO_KEGG_DATA             |
| SS5_1928_s_at    | 3.341423506 | 0.00016005  | Increase_in_Adherent | NO_KEGG_DATA                                                                                                                                           | NO_KEGG_DATA             |
| SD1_1765_at      | 3.27870319  | 0.000290704 | Increase_in_Adherent | NO_KEGG_DATA                                                                                                                                           | NO_KEGG_DATA             |
| SD1_0998_s_at    | 3.254654737 | 0.000313497 | Increase_in_Adherent | NO_KEGG_DATA                                                                                                                                           | NO_KEGG_DATA             |
| c0511_s_at       | 3.174120061 | 1.20E-05    | Increase_in_Adherent | NO_KEGG_DATA                                                                                                                                           | NO_KEGG_DATA             |
| S2121_x_at       | 3.162633479 | 0.000249231 | Increase_in_Adherent | transposase (IS4 family)                                                                                                                               | sbv:SbBS512_E1691        |
| SS5_3223_s_at    | 2.94619103  | 0.002054826 | Increase_in_Adherent | NO_KEGG_DATA                                                                                                                                           | NO_KEGG_DATA             |
| EC9_1238_s_at    | 2.862502378 | 4.07E-05    | Increase_in_Adherent | hypothetical protein                                                                                                                                   | ecw:EcE24377A_1340       |
| EC869_7066_x_at  | 2.844254044 | 0.002132362 | Increase_in_Adherent | ADP-ribosylglycohydrolase family protein ; K05521 ADP-ribosylglycohydrolase [EC:3.2.-.]                                                                | sbv:SbBS512_E1139        |
| b4060_s_at       | 2.831107646 | 0.035196322 | Increase_in_Adherent | ycjB; hypothetical protein                                                                                                                             | sdv:SDY_4507             |
| SB5_0762_s_at    | 2.734698737 | 0.028542042 | Increase_in_Adherent | NO_KEGG_DATA                                                                                                                                           | NO_KEGG_DATA             |
| EC869_0252_s_at  | 2.702537684 | 0.000630605 | Increase_in_Adherent | NO_KEGG_DATA                                                                                                                                           | NO_KEGG_DATA             |
| EC869_3005_x_at  | 2.674321482 | 0.001711709 | Increase_in_Adherent | phnK; phosphonate C-P lyase system protein PhnK ; K05781 putative phosphonate transport system ATP-binding protein                                     | sbo:SBO_4123             |
| EC869_2283_s_at  | 2.64745681  | 0.000183281 | Increase_in_Adherent | metH; B12-dependent methionine synthase ; K00548 5-methyltetrahydrofolate-homocysteine methyltransferase [EC:2.1.1.13]                                 | cko:CKO_03902            |
| SBO_0242_s_at    | 2.596453763 | 1.65E-05    | Increase_in_Adherent | prfH; peptide chain release factor-like protein ; K02839 peptide chain release factor RF-H                                                             | sdv:SDY_0481             |
| A3217_s_at       | 2.487467147 | 0.001509214 | Increase_in_Adherent | NO_KEGG_DATA                                                                                                                                           | NO_KEGG_DATA             |
| b0113_s_at       | 2.421377298 | 0.006374488 | Increase_in_Adherent | pdhR; transcriptional regulator PdhR ; K05799 GntR family transcriptional regulator, transcriptional repressor for pyruvate dehydrogenase complex      | sdv:SDY_0143             |
| L4020_s_at       | 2.383643228 | 7.90E-06    | Increase_in_Adherent | NO_KEGG_DATA                                                                                                                                           | NO_KEGG_DATA             |
| S1087_s_at       | 2.373402292 | 7.68E-06    | Increase_in_Adherent | NO_KEGG_DATA                                                                                                                                           | NO_KEGG_DATA             |
| ECP_4339_s_at    | 2.342157822 | 0.007839305 | Increase_in_Adherent | NO_KEGG_DATA                                                                                                                                           | NO_KEGG_DATA             |
| b0957_s_at       | 2.280984057 | 0.000577787 | Increase_in_Adherent | NO_KEGG_DATA                                                                                                                                           | NO_KEGG_DATA             |
| c3413_s_at       | 2.259757707 | 0.002000598 | Increase_in_Adherent | NO_KEGG_DATA                                                                                                                                           | NO_KEGG_DATA             |
| SDM_4211_x_at    | 2.258436431 | 0.000613156 | Increase_in_Adherent | L(+)-tartarate dehydratase subunit beta ; K03780 L(+)-tartarate dehydratase beta subunit [EC:4.2.1.32]                                                 | cko:CKO_04452            |
| AFFX-25srRnad_at | 2.126497314 | 0.000254012 | Increase_in_Adherent | hypothetical protein                                                                                                                                   | ppp:PHYPADRAFT_103626    |
| b0583_s_at       | 2.047777996 | 0.003577589 | Increase_in_Adherent | NO_KEGG_DATA                                                                                                                                           | NO_KEGG_DATA             |
| V1792_s_at       | 1.99677787  | 0.04885354  | Increase_in_Adherent | cysteine desulfurase IscS (EC:2.8.1.7); K04487 cysteine desulfurase [EC:2.8.1.7]                                                                       | dze:Dd1591_1104          |
| EC536_1754_x_at  | 1.959771988 | 0.010888817 | Increase_in_Adherent | phnK; phosphonate C-P lyase system protein PhnK ; K05781 putative phosphonate transport system ATP-binding protein                                     | sbo:SBO_4123             |
| EC869_5323_s_at  | 1.952182908 | 0.000404866 | Increase_in_Adherent | mtr; tryptophan permease ; K03835 tryptophan-specific transport protein                                                                                | sdv:SDY_3340             |
| b3161_s_at       | 1.94089143  | 0.032547659 | Increase_in_Adherent | mtr; tryptophan permease ; K03835 tryptophan-specific transport protein                                                                                | sdv:SDY_3340             |
| V0229_s_at       | 1.876626876 | 0.034084599 | Increase_in_Adherent | ycjB; hypothetical protein                                                                                                                             | sdv:SDY_4507             |
| b1531_s_at       | 1.875262525 | 0.015191741 | Increase_in_Adherent | DNA-binding transcriptional activator MarA                                                                                                             | cko:CKO_01552            |
| F4980_s_at       | 1.860218382 | 0.000589014 | Increase_in_Adherent | ferric iron reductase involved in ferric hydroxamate transport                                                                                         | edi:EcColC_3688          |
| D4795_s_at       | 1.772324507 | 0.031390751 | Increase_in_Adherent | ybl207; hypothetical protein                                                                                                                           | ebi:B21_03841            |
| A1975_s_at       | 1.767655466 | 0.000857729 | Increase_in_Adherent | hypothetical protein                                                                                                                                   | cko:CKO_00114            |
| A1802_s_at       | 1.750779417 | 0.000468091 | Increase_in_Adherent | serine acetyltransferase (EC:2.3.1.30); K00640 serine O-acetyltransferase [EC:2.3.1.30]                                                                | ttu:TERTU_0669           |
| ECP_3905_s_at    | 1.744024296 | 0.038819294 | Increase_in_Adherent | rnP; ribonuclease P (EC:3.1.26.5); K03536 ribonuclease P protein component [EC:3.1.26.5]                                                               | sdv:SDY_4186             |
| AFFX-18srRnaa_at | 1.722622005 | 0.000894788 | Increase_in_Adherent | hypothetical protein LOC769550                                                                                                                         | gga:G769550              |
| D4794_s_at       | 1.660321085 | 0.00945824  | Increase_in_Adherent | hypothetical protein                                                                                                                                   | cef:CE1543               |
| D4793_s_at       | 1.60084765  | 0.023643729 | Increase_in_Adherent | hypothetical protein                                                                                                                                   | lpr:pg2751               |
| V1827_x_at       | 1.591600861 | 0.013900562 | Increase_in_Adherent | pbpC; penicillin-binding protein 1C (EC:2.4.2.-); K05367 penicillin-binding protein 1C [EC:2.4.1.-]                                                    | sbv:SbBS512_E2894        |
| D4792_s_at       | 1.542942674 | 0.042466788 | Increase_in_Adherent | hypothetical protein                                                                                                                                   | bnj:BMULJ_05092          |
| V0550_s_at       | 1.536169695 | 0.015583986 | Increase_in_Adherent | yegH; UPF0053 protein YegH                                                                                                                             | ctu:Clu_27600            |
| M0299_x_at       | 1.528937614 | 0.035636063 | Increase_in_Adherent | hypothetical protein ; K07090                                                                                                                          | sbv:SbBS512_E2705        |
| EC536_6685_s_at  | 1.500206271 | 0.006728467 | Increase_in_Adherent | NO_KEGG_DATA                                                                                                                                           | NO_KEGG_DATA             |
| ECP_3198_s_at    | 1.432541687 | 0.032420828 | Increase_in_Adherent | NO_KEGG_DATA                                                                                                                                           | NO_KEGG_DATA             |
| ECP_0062_s_at    | 1.427598482 | 0.032340035 | Increase_in_Adherent | araD; L-ribulose-5-phosphate 4-epimerase (EC:5.1.3.4); K01786 L-ribulose-5-phosphate 4-epimerase [EC:5.1.3.4]                                          | kpe:KPK_4682             |
| G4660_at         | 1.346838003 | 0.02525556  | Increase_in_Adherent | NO_KEGG_DATA                                                                                                                                           | NO_KEGG_DATA             |
| V4037_s_at       | 1.344099221 | 0.005561907 | Increase_in_Adherent | hypothetical protein ; K00117 quinoprotein glucose dehydrogenase [EC:1.1.5.2]                                                                          | cko:CKO_03243            |
| AFFX-25srRnad_at | 1.340464038 | 0.001385801 | Increase_in_Adherent | hypothetical protein                                                                                                                                   | kla:KLLA0D17578g         |
| pCoo036_x_at     | 1.242240393 | 0.002944779 | Increase_in_Adherent | repA; replication protein                                                                                                                              | ecw:EcE24377A_C0025      |
| Z2553_s_at       | 1.229243042 | 0.031559344 | Increase_in_Adherent | yciG; hypothetical protein; K06884                                                                                                                     | sfv:SFV_1273             |
| V0683_s_at       | 1.228525846 | 0.021110027 | Increase_in_Adherent | ABC transporter, quaternary amine uptake (QAT) family, permease protein ; K05846 osmoprotectant transport system permease protein                      | sbv:SbBS512_E0843        |
| A3232_s_at       | 1.214234501 | 0.037334567 | Increase_in_Adherent | NO_KEGG_DATA                                                                                                                                           | NO_KEGG_DATA             |
| A3516_s_at       | 1.194956785 | 0.007234506 | Increase_in_Adherent | hypothetical protein                                                                                                                                   | sbv:SbBS512_E2502        |
| c0262_x_at       | 1.178468014 | 0.000717211 | Increase_in_Adherent | putative protein encoded within IS                                                                                                                     | sf:CP0086                |
| V5493_x_at       | 1.176311235 | 0.001355963 | Increase_in_Adherent | phosphoglycolate phosphatase ; K01091 phosphoglycolate phosphatase [EC:3.1.3.18]                                                                       | cko:CKO_04806            |
| EC869_0480_s_at  | 1.114666936 | 0.006253729 | Increase_in_Adherent | zntA; zinc/cadmium/mercury/lead-transporting ATPase (EC:3.6.3.5); K01532 Cd2+-exporting ATPase [EC:3.6.3.5]; K01534 Zn2+-exporting ATPase [EC:3.6.3.5] | ssn:SSON_3707            |
| D4740_at         | 1.078944025 | 6.73E-07    | Increase_in_Adherent | hypothetical protein                                                                                                                                   | smm:Smp_109290           |

|                  |              |             |                                                                                                                                                                                            |                     |
|------------------|--------------|-------------|--------------------------------------------------------------------------------------------------------------------------------------------------------------------------------------------|---------------------|
| SD1_3102_s_at    | -6.427547052 | 0.008745703 | Decrease_in_adherent metE; 5-methyltetrahydropteroylglutamate-homocysteine S-methyltransferase (EC:2.1.1.14); K00549 5-methyltetrahydropteroylglutamate-homocysteine methyltran            | sdY:SDY_3914        |
| A2032_s_at       | -6.331052702 | 0.002545566 | Decrease_in_adherent metE; 5-methyltetrahydropteroylglutamate-homocysteine S-methyltransferase (EC:2.1.1.14); K00549 5-methyltetrahydropteroylglutamate-homocysteine methyltran            | ssn:SSON_4003       |
| V4383_s_at       | -5.83173624  | 0.003416839 | Decrease_in_adherent pfb; formate acetyltransferase 1; K00656 formate C-acetyltransferase [EC:2.3.1.54]                                                                                    | sdY:SDY_2358        |
| EC869_4008_s_at  | -5.524484838 | 0.000841218 | Decrease_in_adherent pfb; formate acetyltransferase 1; K00656 formate C-acetyltransferase [EC:2.3.1.54]                                                                                    | sdY:SDY_2358        |
| A3028_s_at       | -5.252314181 | 0.00058341  | Decrease_in_adherent hypothetical protein                                                                                                                                                  | sdY:SDY_0367        |
| A4188_s_at       | -5.022479908 | 0.000901535 | Decrease_in_adherent adhA; aldehyde dehydrogenase A (EC:1.2.1.22 1.2.1.21); K00138 lactaldehyde dehydrogenase [EC:1.2.1.22]; K07248 glycolaldehyde dehydrogenase [EC:1.2.1.21]             | sbC:SbBS512_E1635   |
| A1237_s_at       | -4.961943713 | 0.00761433  | Decrease_in_adherent glgS; glycogen synthesis protein GlgS                                                                                                                                 | sdY:SDY_3228        |
| A2373_s_at       | -4.896160705 | 1.55E-05    | Decrease_in_adherent adhE; fumarate reductase subunit D; K00247 fumarate reductase subunit D [EC:1.3.99.1]                                                                                 | sdY:SDY_4395        |
| EC869_1970_s_at  | -4.761558213 | 0.013450862 | Decrease_in_adherent adhE; bifunctional acetaldehyde-CoA/alcohol dehydrogenase; K00001 alcohol dehydrogenase [EC:1.1.1.1]; K04072 acetaldehyde dehydrogenase [EC:1.2.1.10]                 | sdY:SDY_1295        |
| SD1_3168_s_at    | -4.728678396 | 0.01414552  | Decrease_in_adherent adhE; bifunctional acetaldehyde-CoA/alcohol dehydrogenase; K00001 alcohol dehydrogenase [EC:1.1.1.1]; K04072 acetaldehyde dehydrogenase [EC:1.2.1.10]                 | sdY:SDY_1295        |
| V0291_s_at       | -4.563346142 | 0.001327638 | Decrease_in_adherent malE; maltose ABC transporter periplasmic protein; K10108 maltose/maltodextrin transport system substrate-binding protein                                             | ssn:SSON_4212       |
| b4002_s_at       | -4.527401431 | 0.001321476 | Decrease_in_adherent zraP; zinc resistance protein; K07803 zinc resistance-associated protein                                                                                              | sbC:SbBS512_E4493   |
| A3980_s_at       | -4.483927867 | 0.010537802 | Decrease_in_adherent adhE; bifunctional acetaldehyde-CoA/alcohol dehydrogenase; K00001 alcohol dehydrogenase [EC:1.1.1.1]; K04072 acetaldehyde dehydrogenase [EC:1.2.1.10]                 | sdY:SDY_1295        |
| V0290_s_at       | -4.471612231 | 6.16E-06    | Decrease_in_adherent malE; maltose transport system periplasmic maltose-binding component; K10108 maltose/maltodextrin transport system substrate-binding protein                          | kpu:KPY_0275        |
| G3995_s_at       | -4.432274242 | 7.50E-05    | Decrease_in_adherent NO_KEGG_DATA                                                                                                                                                          | NO_KEGG_DATA        |
| V2454_s_at       | -4.432076442 | 0.020237987 | Decrease_in_adherent dhaL; dihydroxyacetone kinase ADP-binding subunit (EC:2.7.1.-); K05879 dihydroxyacetone kinase, C-terminal domain [EC:2.7.1.-]                                        | sbC:SbBS512_E1358   |
| V7066_s_at       | -4.417353118 | 0.005625045 | Decrease_in_adherent hypothetical protein                                                                                                                                                  | ecx:EcHS_A1937      |
| b1846_s_at       | -4.368394178 | 0.013499171 | Decrease_in_adherent hypothetical protein                                                                                                                                                  | ecx:EcHS_A1937      |
| A2135_s_at       | -4.361284236 | 0.004266081 | Decrease_in_adherent hypothetical protein                                                                                                                                                  | sbC:SbBS512_E4404   |
| V1509_s_at       | -4.235920745 | 0.007730285 | Decrease_in_adherent gapA; glyceraldehyde-3-phosphate dehydrogenase A; K00134 glyceraldehyde 3-phosphate dehydrogenase [EC:1.2.1.12]                                                       | sdY:SDY_1488        |
| A2229_s_at       | -4.190485913 | 0.012703192 | Decrease_in_adherent pepE; peptidase E (EC:3.4.13.21); K05995 dipeptidase E [EC:3.4.13.21]                                                                                                 | sbC:SbBS512_E4515   |
| A2136_s_at       | -4.157487045 | 3.47E-05    | Decrease_in_adherent yjiT; universal stress protein UspD                                                                                                                                   | sdY:SDY_3821        |
| V3051_s_at       | -4.125072934 | 0.008770613 | Decrease_in_adherent NO_KEGG_DATA                                                                                                                                                          | NO_KEGG_DATA        |
| b4189_s_at       | -4.12289405  | 0.003552868 | Decrease_in_adherent yjiF; hypothetical protein                                                                                                                                            | sdY:SDY_4358        |
| V4449_s_at       | -4.117559516 | 0.010486473 | Decrease_in_adherent dmsA; anaerobic dimethyl sulfoxide reductase subunit A; K07306 anaerobic dimethyl sulfoxide reductase subunit A [EC:1.8.99.-]                                         | sbo:SBO_0827        |
| ECs2489_s_at     | -4.106340737 | 0.007322581 | Decrease_in_adherent yeaD; hypothetical protein                                                                                                                                            | etw:ECSP_2352       |
| V0028_s_at       | -4.089697338 | 0.003285994 | Decrease_in_adherent frdA; fumarate reductase flavoprotein subunit (EC:1.3.99.1); K00244 fumarate reductase flavoprotein subunit [EC:1.3.99.1]                                             | sdY:SDY_4398        |
| SD1_3424_s_at    | -4.081387034 | 0.013279759 | Decrease_in_adherent asnB; asparagine synthetase B; K01953 asparagine synthase (glutamine-hydrolysing) [EC:6.3.5.4]                                                                        | spe:Spro_1222       |
| p166897_140_s_at | -4.071235828 | 0.000934873 | Decrease_in_adherent mok; modulator of post-segregation killing protein                                                                                                                    | ecv:APECO1_01CoBM20 |
| V0033_s_at       | -4.039025222 | 0.000679152 | Decrease_in_adherent frdB; fumarate reductase iron-sulfur subunit (EC:1.3.99.1); K00245 fumarate reductase iron-sulfur protein [EC:1.3.99.1]                                               | sbC:SbBS512_E4685   |
| M3390_s_at       | -4.032311351 | 0.001929966 | Decrease_in_adherent NO_KEGG_DATA                                                                                                                                                          | NO_KEGG_DATA        |
| V0058_s_at       | -4.031894473 | 0.000646269 | Decrease_in_adherent aspA; aspartate ammonia-lyase (EC:4.3.1.1); K01744 aspartate ammonia-lyase [EC:4.3.1.1]                                                                               | sdY:SDY_4444        |
| V0242_s_at       | -4.030291619 | 1.34E-05    | Decrease_in_adherent NO_KEGG_DATA                                                                                                                                                          | NO_KEGG_DATA        |
| V5434_s_at       | -4.02286197  | 0.016141102 | Decrease_in_adherent NO_KEGG_DATA                                                                                                                                                          | NO_KEGG_DATA        |
| b2597_s_at       | -3.999392341 | 0.000557263 | Decrease_in_adherent hypothetical protein                                                                                                                                                  | eci:UT189_C2930     |
| A3481_s_at       | -3.973324861 | 0.002267151 | Decrease_in_adherent ginQ; glutamine ABC transporter ATP-binding protein; K10038 glutamine transport system ATP-binding protein [EC:3.6.3.-]                                               | sdY:SDY_0787        |
| EC869_0982_s_at  | -3.944039989 | 0.007779627 | Decrease_in_adherent hypothetical protein                                                                                                                                                  | eci:UT189_C2580     |
| SD1_0493_s_at    | -3.907929882 | 0.006979332 | Decrease_in_adherent malP; maltodextrin phosphorylase; K00688 starch phosphorylase [EC:2.4.1.1]                                                                                            | ssn:SSON_3549       |
| A1692_s_at       | -3.898379448 | 5.19E-05    | Decrease_in_adherent hdeB; acid-resistance protein                                                                                                                                         | sbC:SbBS512_E3907   |
| EC869_0579_s_at  | -3.896682023 | 0.035721537 | Decrease_in_adherent slp; outer membrane protein induced after carbon starvation; K07285 outer membrane lipoprotein                                                                        | sdY:SDY_3557        |
| V0034_s_at       | -3.896008722 | 8.98E-06    | Decrease_in_adherent frdC; fumarate reductase subunit C; K00246 fumarate reductase subunit C [EC:1.3.99.1]                                                                                 | sbC:SbBS512_E4684   |
| A0545_s_at       | -3.863916517 | 0.000222016 | Decrease_in_adherent sseA; 3-mercaptopyruvate sulfurtransferase; K01011 3-mercaptopyruvate sulfurtransferase [EC:2.8.1.2]                                                                  | sko:CKO_00261       |
| A2931_s_at       | -3.857933932 | 0.004158454 | Decrease_in_adherent yagJ; hypothetical protein; K08996 putative membrane protein                                                                                                          | eqj:ECCO26_0322     |
| A4639_s_at       | -3.813534085 | 0.000208219 | Decrease_in_adherent cold shock-like protein CspC; K03704 cold shock protein (beta-ribon, CspA family)                                                                                     | sdY:SDY_01152       |
| ECP_4059_s_at    | -3.800590664 | 0.000341897 | Decrease_in_adherent fadB; multifunctional fatty acid oxidation complex subunit alpha (EC:5.3.3.8 5.1.2.3 1.1.1.35 4.2.1.17); K00022 3-hydroxyacyl-CoA dehydrogenase [EC:1.1.1.35]; K01692 | ecp:ECP_4059        |
| A0068_at         | -3.793681442 | 0.022719854 | Decrease_in_adherent vipB; Vi polysaccharide biosynthesis protein VipB/TviC                                                                                                                | ecw:EcE24377A_2324  |
| A2210_s_at       | -3.782552484 | 0.000306188 | Decrease_in_adherent hupA; transcriptional regulator HU subunit alpha; K05787 DNA-binding protein HU-alpha                                                                                 | sdY:SDY_3726        |
| EC869_6281_s_at  | -3.773350917 | 0.001775501 | Decrease_in_adherent eno; phosphopyruvate hydratase; K01689 enolase [EC:4.2.1.11]                                                                                                          | sko:CKO_04134       |
| F2023_at         | -3.75828255  | 3.08E-05    | Decrease_in_adherent hypothetical protein                                                                                                                                                  | sdY:SDY_1970        |
| Sb5_4039_s_at    | -3.755415548 | 0.005702743 | Decrease_in_adherent ybeJ; glutamate and aspartate transporter subunit; K10001 glutamate/aspartate transport system substrate-binding protein                                              | sdY:SDY_0592        |
| A2825_s_at       | -3.748276385 | 1.26E-06    | Decrease_in_adherent hlpA; periplasmic chaperone; K06142 outer membrane protein                                                                                                            | sdY:SDY_0194        |
| Sb5_1437_s_at    | -3.746594392 | 1.66E-05    | Decrease_in_adherent dmsB1; anaerobic dimethyl sulfoxide reductase, B subunit                                                                                                              | sbC:SbBS512_E1775   |
| H4310_x_at       | -3.744239716 | 0.004893524 | Decrease_in_adherent NO_KEGG_DATA                                                                                                                                                          | NO_KEGG_DATA        |
| V6213_s_at       | -3.729138072 | 5.89E-05    | Decrease_in_adherent OsmC family protein; K04063 osmotically inducible protein OsmC                                                                                                        | ent:Ent638_2041     |
| SD1_0513_s_at    | -3.719340718 | 0.008542829 | Decrease_in_adherent pckA; phosphoenolpyruvate carboxykinase (EC:4.1.1.49); K01610 phosphoenolpyruvate carboxykinase (ATP) [EC:4.1.1.49]                                                   | sdY:SDY_3673        |
| V5800_at         | -3.715094779 | 0.00054037  | Decrease_in_adherent yjiE; hypothetical protein                                                                                                                                            | ssn:SSON_4117       |
| A2220_s_at       | -3.714431024 | 0.01150689  | Decrease_in_adherent NO_KEGG_DATA                                                                                                                                                          | NO_KEGG_DATA        |
| b2579_s_at       | -3.707169565 | 0.001031566 | Decrease_in_adherent grcA; autonomous glycol radical cofactor GrcA; K06866 autonomous glycol radical cofactor                                                                              | sbC:SbBS512_E2957   |
| V7049_s_at       | -3.705339235 | 2.55E-05    | Decrease_in_adherent pykA; pyruvate kinase (EC:2.7.1.40); K00873 pyruvate kinase [EC:2.7.1.40]                                                                                             | sdY:SDY_1141        |
| V3561_s_at       | -3.689700401 | 0.001871911 | Decrease_in_adherent purC; phosphoribosylaminoimidazole-succinocarboxamide synthase (EC:6.3.2.6); K01923 phosphoribosylaminoimidazole-succinocarboxamide synthase [EC:6.3.2.6]             | sdY:SDY_2684        |
| A1218_s_at       | -3.689536177 | 0.000796254 | Decrease_in_adherent hypothetical protein                                                                                                                                                  | eci:UT189_C3456     |
| EC869_1963_s_at  | -3.67228583  | 0.002183122 | Decrease_in_adherent hns; global DNA-binding transcriptional dual regulator H-NS; K03746 DNA-binding protein H-NS                                                                          | sdY:SDY_1289        |
| V2862_s_at       | -3.667745188 | 0.008385431 | Decrease_in_adherent fba; fructose-bisphosphate aldolase (EC:4.1.2.13); K01624 fructose-bisphosphate aldolase, class II [EC:4.1.2.13]                                                      | sdY:SDY_3157        |
| A3938_s_at       | -3.660847826 | 0.041582479 | Decrease_in_adherent dhaK; dihydroxyacetone kinase N-terminal domain containing protein; K05878 dihydroxyacetone kinase, N-terminal domain [EC:2.7.1.-]                                    | eqj:ECCO26_1713     |
| b1743_s_at       | -3.622031493 | 0.002617798 | Decrease_in_adherent hypothetical protein                                                                                                                                                  | eci:UT189_C1937     |
| V4114_s_at       | -3.608162723 | 0.017312418 | Decrease_in_adherent glyA; serine hydroxymethyltransferase (EC:2.1.2.1); K00600 glycine hydroxymethyltransferase [EC:2.1.2.1]                                                              | sdY:SDY_2741        |
| A1693_s_at       | -3.601442092 | 7.43E-06    | Decrease_in_adherent hdeA; acid-resistance protein                                                                                                                                         | sdY:SDY_3543        |
| V5859_s_at       | -3.589647662 | 0.005985397 | Decrease_in_adherent tpiA; triosephosphate isomerase (EC:5.3.1.1); K01803 triosephosphate isomerase (TIM) [EC:5.3.1.1]                                                                     | sdY:SDY_3826        |
| W4275_at         | -3.582408116 | 0.000689605 | Decrease_in_adherent putative cytoplasmic protein                                                                                                                                          | stm:STM1872         |
| EC869_5449_s_at  | -3.570653976 | 0.025140527 | Decrease_in_adherent nanA; N-acetylneuraminate lyase (EC:4.1.3.3); K01639 N-acetylneuraminate lyase [EC:4.1.3.3]                                                                           | sdY:SDY_3400        |
| ECs0981_s_at     | -3.562107295 | 0.020916666 | Decrease_in_adherent hypothetical protein; K07308 anaerobic dimethyl sulfoxide reductase subunit C (DMSO reductase anchor subunit)                                                         | sko:CKO_02174       |
| ECs5340_s_at     | -3.549261889 | 0.000231529 | Decrease_in_adherent NO_KEGG_DATA                                                                                                                                                          | NO_KEGG_DATA        |
| b1376_s_at       | -3.538222965 | 0.000649915 | Decrease_in_adherent ynaF; stress-induced protein, ATP-binding protein                                                                                                                     | ebf:ECB_01347       |
| b3339_s_at       | -3.527237152 | 3.39E-06    | Decrease_in_adherent tuFB; tuf; elongation factor Tu (EC:3.6.5.3); K02358 elongation factor EF-Tu [EC:3.6.5.3]                                                                             | sdY:SDY_3748        |

|                  |              |             |                      |                                                                                                                                  |                     |
|------------------|--------------|-------------|----------------------|----------------------------------------------------------------------------------------------------------------------------------|---------------------|
| A0189_s_at       | -3.52576989  | 2.81E-05    | Decrease_in_adherent | mgIB; galactose-binding transport protein ; K10540 methyl-galactoside transport system substrate-binding protein                 | sdv:SDY_2130        |
| N4689_at         | -3.519238199 | 0.001697785 | Decrease_in_adherent | NO_KEGG_DATA                                                                                                                     | NO_KEGG_DATA        |
| D4441_s_at       | -3.506924754 | 0.001330531 | Decrease_in_adherent | NO_KEGG_DATA                                                                                                                     | NO_KEGG_DATA        |
| A4382_s_at       | -3.503271392 | 2.49E-05    | Decrease_in_adherent | NO_KEGG_DATA                                                                                                                     | NO_KEGG_DATA        |
| EC869_8900_s_at  | -3.498335543 | 0.011239915 | Decrease_in_adherent | hydrogenase 2 small subunit [EC:1.12.99.6]; K02682 hydrogenase small subunit [EC:1.12.99.6]                                      | sdv:SDY_3076        |
| ECs0987_s_at     | -3.48464145  | 0.012143551 | Decrease_in_adherent | foaA; formate transporter ; K06212 formate transporter                                                                           | sdv:SDY_2357        |
| V3949_s_at       | -3.477995381 | 0.006731208 | Decrease_in_adherent | NarL; transcriptional regulator NarL. ; K07684 two-component system, NarL family, nitrate/nitrite response regulator NarL        | sdv:SDY_1275        |
| A1081_at         | -3.46637288  | 0.010833386 | Decrease_in_adherent | phage integrase family protein                                                                                                   | ecw:ECe24377A_3356  |
| EC869_2220_s_at  | -3.458930344 | 0.00441242  | Decrease_in_adherent | NO_KEGG_DATA                                                                                                                     | NO_KEGG_DATA        |
| EC869_3973_s_at  | -3.458833017 | 0.000228322 | Decrease_in_adherent | transcriptional regulator, AsnC family                                                                                           | etr:ETA_E_2200      |
| S55_4395_s_at    | -3.452379282 | 0.001810673 | Decrease_in_adherent | shiA; shikimate transporter ; K08172 MFS transporter, MHS family, shikimate and dehydroshikimate transport protein               | sdv:SDY_2254        |
| A4608_s_at       | -3.450639994 | 0.001848097 | Decrease_in_adherent | yeaQ; hypothetical protein                                                                                                       | sdv:SDY_1695        |
| A1694_s_at       | -3.445041468 | 0.008409911 | Decrease_in_adherent | acid-resistance membrane protein                                                                                                 | sbcs:SBBS512_E3909  |
| A3097_s_at       | -3.444940261 | 0.000413357 | Decrease_in_adherent | hupB; transcriptional regulator HU subunit beta ; K03530 DNA-binding protein HU-beta                                             | sdv:SDY_0292        |
| A3945_s_at       | -3.440425628 | 0.001483255 | Decrease_in_adherent | hypothetical protein                                                                                                             | sbcs:SBBS512_E1369  |
| c0238_s_at       | -3.414534703 | 0.004304425 | Decrease_in_adherent | metQ; DL-methionine transporter substrate-binding subunit; K02073 D-methionine transport system substrate-binding protein        | ecc:c0238           |
| EC869_2294_s_at  | -3.408569994 | 0.013763863 | Decrease_in_adherent | pepE; peptidase E (EC:3.4.13.21); K05995 dipeptidase E [EC:3.4.13.21]                                                            | sbcs:SBBS512_E4515  |
| APeCO1_1866_s_at | -3.402803482 | 0.002998064 | Decrease_in_adherent | NO_KEGG_DATA                                                                                                                     | NO_KEGG_DATA        |
| V3435_s_at       | -3.400077294 | 2.48E-05    | Decrease_in_adherent | ptsI; phosphoenolpyruvate-protein phosphotransferase (EC:2.7.3.9); K08483 phosphotransferase system, enzyme I, PtsI [EC:2.7.3.9] | sdv:SDY_2613        |
| A4620_s_at       | -3.395775429 | 0.000159738 | Decrease_in_adherent | putative outer membrane protein ; K07285 outer membrane lipoprotein                                                              | sdv:SDY_1710        |
| A3235_s_at       | -3.395620059 | 0.023560039 | Decrease_in_adherent | ybdH; hypothetical protein ; K08317 putative oxidoreductase [EC:1.1.-.-]                                                         | sdv:SDY_0531        |
| V2453_s_at       | -3.392179703 | 0.023940565 | Decrease_in_adherent | dhaH; fused putative dihydroxyacetone-specific PTS enzymes: HPr component/El component; K05881 PTS hybrid protein                | eah:ECO103_1300     |
| EC869_5018_s_at  | -3.37755348  | 0.003776332 | Decrease_in_adherent | gltA; type II citrate synthase (EC:2.3.3.1); K01647 citrate synthase [EC:2.3.3.1]                                                | sdv:SDY_0658        |
| D4819_s_at       | -3.375631441 | 0.006405765 | Decrease_in_adherent | putative transposase                                                                                                             | ecw:ECe24377A_D0068 |
| S2143_x_at       | -3.374906608 | 0.016786314 | Decrease_in_adherent | putative cell killing protein of prophage                                                                                        | sfk:S2143           |
| F3184_s_at       | -3.366783215 | 9.59E-05    | Decrease_in_adherent | bgIA; 6-phospho-beta-glucosidase A, cryptic ; K01223 6-phospho-beta-glucosidase [EC:3.2.1.86]                                    | ssn:SSON_3054       |
| A2199_s_at       | -3.35874889  | 0.009403221 | Decrease_in_adherent | rpoC; DNA-directed RNA polymerase subunit beta' (EC:2.7.7.6); K03046 DNA-directed RNA polymerase subunit beta' [EC:2.7.7.6]      | sbo:SBO_4008        |
| SB5_4158_s_at    | -3.357818185 | 0.012369338 | Decrease_in_adherent | phoH; hypothetical protein ; K06217 phosphate starvation-inducible protein PhoH and related proteins                             | sbcs:SBBS512_E2301  |
| EC869_3914_s_at  | -3.347070159 | 2.31E-06    | Decrease_in_adherent | elongation factor Tu ; K02358 elongation factor EF-Tu [EC:3.6.5.3]                                                               | ckc:CKO_03011       |
| UT189_C2497_s_at | -3.337285371 | 0.00041619  | Decrease_in_adherent | NO_KEGG_DATA                                                                                                                     | NO_KEGG_DATA        |
| A4742_s_at       | -3.328913365 | 0.000584013 | Decrease_in_adherent | flhC; flagellin ; K02406 flagellin                                                                                               | ecw:ECe24377A_2158  |
| S55_4352_s_at    | -3.327116909 | 0.00435472  | Decrease_in_adherent | NO_KEGG_DATA                                                                                                                     | NO_KEGG_DATA        |
| A2477_x_at       | -3.324628654 | 0.000659823 | Decrease_in_adherent | yjgD; hypothetical protein ; K09893 hypothetical protein                                                                         | sdv:SDY_4277        |
| pCoo074_at       | -3.310493299 | 0.015588432 | Decrease_in_adherent | fImC; modulator of post-segregation killing protein                                                                              | ecz:PECS88_0057     |
| K2723_at         | -3.303754318 | 0.006015084 | Decrease_in_adherent | NO_KEGG_DATA                                                                                                                     | NO_KEGG_DATA        |
| SD1_0481_s_at    | -3.301229934 | 0.000431201 | Decrease_in_adherent | gIpD; glycerol-3-phosphate dehydrogenase (EC:1.1.5.3); K00111 glycerol-3-phosphate dehydrogenase [EC:1.1.5.3]                    | sbcs:SBBS512_E3808  |
| A2345_s_at       | -3.292004147 | 0.004757175 | Decrease_in_adherent | yjJ; hypothetical protein ; K06975                                                                                               | sdv:SDY_4240        |
| K4999_s_at       | -3.287822398 | 0.006945346 | Decrease_in_adherent | asparagine synthetase AsnA ; K01914 aspartate--ammonia ligase [EC:6.3.1.1]                                                       | ckc:CKO_00084       |
| A2162_s_at       | -3.282353946 | 0.000271763 | Decrease_in_adherent | gIdA; glycerol dehydrogenase (EC:1.1.1.6); K00005 glycerol dehydrogenase [EC:1.1.1.6]                                            | sdv:SDY_3780        |
| c0897_s_at       | -3.282216526 | 0.020634869 | Decrease_in_adherent | hypothetical protein                                                                                                             | ecc:c0897           |
| A0334_s_at       | -3.278547811 | 0.001330641 | Decrease_in_adherent | ackA; acetate kinase (EC:2.7.2.1); K00925 acetate kinase [EC:2.7.2.1]                                                            | sbcs:SBBS512_E2672  |
| b1094_s_at       | -3.262998909 | 2.95E-06    | Decrease_in_adherent | hypothetical protein                                                                                                             | eci:UT189_C1219     |
| EC536_2323_s_at  | -3.255366346 | 0.000543615 | Decrease_in_adherent | hypothetical protein                                                                                                             | ecc:c3343           |
| EC869_3589_s_at  | -3.255125648 | 0.000119582 | Decrease_in_adherent | dps; DNA starvation/stationary phase protection protein Dps ; K04047 starvation-inducible DNA-binding protein                    | sdv:SDY_0783        |
| EC869_0979_s_at  | -3.24962638  | 0.001210085 | Decrease_in_adherent | acetate kinase ; K00925 acetate kinase [EC:2.7.2.1]                                                                              | cko:CKO_00498       |
| SD1_3595_s_at    | -3.246995699 | 0.011083463 | Decrease_in_adherent | gpmA; phosphoglyceromutase 1 ; K01834 phosphoglycerate mutase [EC:5.4.2.1]                                                       | sdv:SDY_0702        |
| V5372_s_at       | -3.24619394  | 0.011350687 | Decrease_in_adherent | yhhA; hypothetical protein                                                                                                       | sdv:SDY_3596        |
| W4348_at         | -3.238216707 | 0.006292619 | Decrease_in_adherent | putative cytoplasmic protein                                                                                                     | stm:STM4002         |
| A0438_s_at       | -3.236108374 | 0.001754326 | Decrease_in_adherent | rrr; glucose-specific PTS system component (EC:2.7.1.-); K02777 PTS system, glucose-specific IIA component [EC:2.7.1.69]         | kpe:KPK_1374        |
| V2081_s_at       | -3.231507685 | 0.003345516 | Decrease_in_adherent | yjgR; putative NAD(P)-binding dehydrogenase                                                                                      | ej:ECO26_4190       |
| EC869_5629_s_at  | -3.226018867 | 0.000827318 | Decrease_in_adherent | NO_KEGG_DATA                                                                                                                     | NO_KEGG_DATA        |
| F4521_s_at       | -3.222714537 | 0.000957859 | Decrease_in_adherent | NO_KEGG_DATA                                                                                                                     | NO_KEGG_DATA        |
| pCoo013_at       | -3.211969793 | 0.000122787 | Decrease_in_adherent | CS1 type fibrillar major subunit                                                                                                 | spe:Spro_0216       |
| EC869_5178_s_at  | -3.20867063  | 0.000168135 | Decrease_in_adherent | lpdA; dihydroliipoamide dehydrogenase (EC:1.8.1.4); K00382 dihydroliipoamide dehydrogenase [EC:1.8.1.4]                          | sdv:SDY_0146        |
| A3684_s_at       | -3.1951023   | 0.025896639 | Decrease_in_adherent | NO_KEGG_DATA                                                                                                                     | NO_KEGG_DATA        |
| A2260_s_at       | -3.183237696 | 0.007302389 | Decrease_in_adherent | yjvJ; putative stress-response protein                                                                                           | sdv:SDY_4529        |
| V2860_s_at       | -3.180564108 | 0.001921992 | Decrease_in_adherent | pgk; phosphoglycerate kinase ; K00927 phosphoglycerate kinase [EC:2.7.2.3]                                                       | cko:CKO_04296       |
| b1854_s_at       | -3.179703693 | 0.00213108  | Decrease_in_adherent | ypbK; pyruvate kinase (EC:2.7.1.40); K00873 pyruvate kinase [EC:2.7.1.40]                                                        | sbcs:SBBS512_E2130  |
| b1243_s_at       | -3.173737311 | 0.002290454 | Decrease_in_adherent | oppA; oligopeptide transporter subunit; K02035 peptide/nickel transport system substrate-binding protein                         | ecj:JW1235          |
| EC869_0204_s_at  | -3.171231525 | 1.74E-05    | Decrease_in_adherent | fusA; elongation factor G ; K02355 elongation factor EF-G [EC:3.6.5.3]                                                           | sdv:SDY_3501        |
| EC869_2217_s_at  | -3.167852569 | 0.000232363 | Decrease_in_adherent | did; D-lactate dehydrogenase (EC:1.1.1.28); K03777 D-lactate dehydrogenase [EC:1.1.1.28]                                         | sdv:SDY_2155        |
| M1976_x_at       | -3.166446345 | 0.002804693 | Decrease_in_adherent | lIdP; L-lactate permease ; K00427 L-lactate permease                                                                             | eci:UT189_C4144     |
| A3486_s_at       | -3.163423673 | 0.000851311 | Decrease_in_adherent | ompB; outer membrane protein X ; K11934 outer membrane protein X                                                                 | sdv:SDY_0781        |
| SD1_3403_s_at    | -3.16212068  | 0.010856485 | Decrease_in_adherent | glutamate and aspartate transporter subunit ; K10001 glutamate/aspartate transport system substrate-binding protein              | cko:CKO_02507       |
| V0312_s_at       | -3.159323301 | 0.005975721 | Decrease_in_adherent | pgi; glucose-6-phosphate isomerase (EC:5.3.1.9); K01810 glucose-6-phosphate isomerase [EC:5.3.1.9]                               | sdv:SDY_4226        |
| SDY_2364_s_at    | -3.157635782 | 0.007744176 | Decrease_in_adherent | hypothetical protein                                                                                                             | cko:CKO_02173       |
| A3388_s_at       | -3.153091676 | 0.007739886 | Decrease_in_adherent | gpmA; phosphoglyceromutase 1 ; K01834 phosphoglycerate mutase [EC:5.4.2.1]                                                       | sdv:SDY_0702        |
| ECP_3241_s_at    | -3.146192719 | 9.86E-06    | Decrease_in_adherent | NO_KEGG_DATA                                                                                                                     | NO_KEGG_DATA        |
| EC869_3598_s_at  | -3.141116641 | 0.010503557 | Decrease_in_adherent | glnQ; glutamine ABC transporter ATP-binding protein ; K10038 glutamine transport system ATP-binding protein [EC:3.6.3.-]         | sdv:SDY_0787        |
| EC869_4317_s_at  | -3.135885155 | 0.004203558 | Decrease_in_adherent | serA; D-3-phosphoglycerate dehydrogenase ; K00058 D-3-phosphoglycerate dehydrogenase [EC:1.1.1.95]                               | sdv:SDY_3169        |
| SD1_1464_s_at    | -3.120934384 | 0.00147101  | Decrease_in_adherent | rimJ; ribosomal-protein-S5-alanine N-acetyltransferase ; K03790 ribosomal-protein-alanine N-acetyltransferase [EC:2.3.1.128]     | sdv:SDY_2086        |
| V0313_s_at       | -3.119967289 | 0.000724953 | Decrease_in_adherent | pgi; glucose-6-phosphate isomerase (EC:5.3.1.9); K01810 glucose-6-phosphate isomerase [EC:5.3.1.9]                               | sdv:SDY_4226        |
| V0311_s_at       | -3.116353775 | 0.001870409 | Decrease_in_adherent | pgi; glucose-6-phosphate isomerase (EC:5.3.1.9); K01810 glucose-6-phosphate isomerase [EC:5.3.1.9]                               | sdv:SDY_4226        |
| V2562_s_at       | -3.115754722 | 0.000176674 | Decrease_in_adherent | gst; glutathione S-transferase ; K00799 glutathione S-transferase [EC:2.5.1.18]                                                  | sdv:SDY_1858        |

|                 |              |             |                                                                                                                                                                                        |                    |
|-----------------|--------------|-------------|----------------------------------------------------------------------------------------------------------------------------------------------------------------------------------------|--------------------|
| A1575_s_at      | -3.112757658 | 0.049699826 | Decrease_in_adherent pckA; phosphoenolpyruvate carboxykinase (EC:4.1.1.49); K01610 phosphoenolpyruvate carboxykinase (ATP) [EC:4.1.1.49]                                               | eci:UT189_C3903    |
| EC869_4095_s_at | -3.097023491 | 0.01666697  | Decrease_in_adherent NO_KEGG_DATA                                                                                                                                                      | NO_KEGG_DATA       |
| A0073_at        | -3.093994222 | 0.002231165 | Decrease_in_adherent rftA; dTDP-4-dehydrorhamnose 3,5-epimerase (EC:5.1.3.13); K01790 dTDP-4-dehydrorhamnose 3,5-epimerase [EC:5.1.3.13]                                               | ecw:EcE24377A_2329 |
| SB5_2457_s_at   | -3.079714211 | 0.000931665 | Decrease_in_adherent csaA; carbon starvation protein A; K06200 carbon starvation protein                                                                                               | sbcb:SbBS512_E0500 |
| SD1_0444_s_at   | -3.074179982 | 0.021271824 | Decrease_in_adherent NO_KEGG_DATA                                                                                                                                                      | NO_KEGG_DATA       |
| EC869_2476_s_at | -3.066676109 | 0.005150255 | Decrease_in_adherent hypothetical protein                                                                                                                                              | eci:UT189_C2016    |
| SB5_0930_x_at   | -3.058244053 | 0.012560339 | Decrease_in_adherent relF; polypeptide destructive to membrane potential                                                                                                               | sdj:SDY_1432       |
| EC869_8291_s_at | -3.05678449  | 0.00804602  | Decrease_in_adherent crr; glucose-specific PTS system component ; K02777 PTS system, glucose-specific IIA component [EC:2.7.1.69]                                                      | sdj:SDY_2614       |
| A1938_s_at      | -3.055581678 | 0.012300297 | Decrease_in_adherent hypothetical protein                                                                                                                                              | ecw:EcE24377A_4248 |
| SF0956_s_at     | -3.053836256 | 0.020967704 | Decrease_in_adherent ycbG; hypothetical protein ; K09911 hypothetical protein                                                                                                          | sdj:SDY_0929       |
| V4370_s_at      | -3.051365341 | 0.000314248 | Decrease_in_adherent gnxB; glutaredoxin 2 ; K03675 glutaredoxin 2                                                                                                                      | sbcb:SbBS512_E2262 |
| EC869_4069_s_at | -3.0471044   | 0.004082414 | Decrease_in_adherent mukB; cell division protein MukB ; K03632 chromosome partition protein MukB                                                                                       | cko:CKO_02144      |
| V0287_s_at      | -3.044122226 | 3.33E-05    | Decrease_in_adherent malM; maltose regulon periplasmic protein MalM; K05775 maltose operon periplasmic protein                                                                         | ej:ECO26_5152      |
| b3928_s_at      | -3.039224427 | 0.000385533 | Decrease_in_adherent yilU; hypothetical protein ; K09892 hypothetical protein                                                                                                          | sdj:SDY_3816       |
| EC536_1048_s_at | -3.028276196 | 0.004909081 | Decrease_in_adherent putative glutamate dehydrogenase                                                                                                                                  | eci:UT189_C0015    |
| SB5_2779_s_at   | -3.021298061 | 0.023105837 | Decrease_in_adherent ynhG; hypothetical protein                                                                                                                                        | sbo:SBO_1452       |
| N3879_s_at      | -3.019997604 | 6.38E-05    | Decrease_in_adherent qor; quinone oxidoreductase, NADPH-dependent ; K00344 NADPH2:quinone reductase [EC:1.6.5.5]                                                                       | sdj:SDY_4523       |
| A0061_x_at      | -3.016837961 | 0.018034423 | Decrease_in_adherent hisI; bifunctional phosphoribosyl-AMP cyclohydrolase/phosphoribosyl-ATP pyrophosphatase protein (EC:3.6.1.31 3.5.4.19); K11755 phosphoribosyl-ATP pyrophosphatase | ssn:SSON_2097      |
| A3367_s_at      | -3.011194869 | 0.006755332 | Decrease_in_adherent sucD; succinyl-CoA synthetase subunit alpha (EC:6.2.1.5); K01902 succinyl-CoA synthetase alpha subunit [EC:6.2.1.5]                                               | sbcb:SbBS512_E0648 |
| SD1_0613_s_at   | -3.002591853 | 0.018973322 | Decrease_in_adherent did; D-lactate dehydrogenase (EC:1.1.1.28); K03777 D-lactate dehydrogenase [EC:1.1.1.28]                                                                          | sdj:SDY_2155       |
| b0786_s_at      | -2.999584531 | 0.008769262 | Decrease_in_adherent ybhL; hypothetical protein ; K06890                                                                                                                               | sdj:SDY_0817       |
| F4838_s_at      | -2.991059175 | 0.008665383 | Decrease_in_adherent pyrI; aspartate carbamoyltransferase regulatory subunit ; K00610 aspartate carbamoyltransferase regulatory subunit                                                | sbcb:SbBS512_E4839 |
| A4701_s_at      | -2.979556092 | 0.000386312 | Decrease_in_adherent cheY; chemotaxis regulatory protein CheY ; K03413 two-component system, chemotaxis family, response regulator CheY                                                | sbcb:SbBS512_E2175 |
| EC869_5019_s_at | -2.970101674 | 0.008611184 | Decrease_in_adherent gltA; type II citrate synthase (EC:2.3.3.1); K01647 citrate synthase [EC:2.3.3.1]                                                                                 | sdj:SDY_0658       |
| V0004_s_at      | -2.966051402 | 0.010785249 | Decrease_in_adherent NO_KEGG_DATA                                                                                                                                                      | NO_KEGG_DATA       |
| A3296_s_at      | -2.964698839 | 0.013321636 | Decrease_in_adherent gltL; glutamate/aspartate ABC transporter, ATP-binding protein ; K10004 glutamate/aspartate transport system ATP-binding protein [EC:3.6.3.-]                     | sbcb:SbBS512_E0597 |
| A2344_s_at      | -2.96444859  | 0.009105682 | Decrease_in_adherent hypothetical protein                                                                                                                                              | sbo:SBO_4330       |
| A1798_x_at      | -2.961264085 | 0.006320292 | Decrease_in_adherent NO_KEGG_DATA                                                                                                                                                      | NO_KEGG_DATA       |
| V4229_s_at      | -2.95727031  | 0.004262507 | Decrease_in_adherent clpB; protein disaggregation chaperone ; K03695 ATP-dependent Clp protease ATP-binding subunit ClpB                                                               | sdj:SDY_2835       |
| EC869_6279_s_at | -2.952618217 | 0.001425049 | Decrease_in_adherent eno; phosphopyruvate hydratase ; K01689 enolase [EC:4.2.1.11]                                                                                                     | kpu:KP1_4395       |
| V2524_s_at      | -2.951003459 | 0.015019059 | Decrease_in_adherent manA; mannose-6-phosphate isomerase [EC:5.3.1.8]                                                                                                                  | sdj:SDY_1829       |
| ECP_4493_x_at   | -2.949753041 | 0.001141587 | Decrease_in_adherent NO_KEGG_DATA                                                                                                                                                      | NO_KEGG_DATA       |
| b0145_s_at      | -2.944951987 | 0.003731501 | Decrease_in_adherent dksA; DnaK suppressor protein; K06204 DnaK suppressor protein                                                                                                     | ctu:CTU_07760      |
| H3052_s_at      | -2.944212219 | 0.019724533 | Decrease_in_adherent NO_KEGG_DATA                                                                                                                                                      | NO_KEGG_DATA       |
| SB5_2069_s_at   | -2.943952182 | 0.000202798 | Decrease_in_adherent hypothetical protein                                                                                                                                              | sbcb:SbBS512_E2723 |
| V1345_s_at      | -2.942364864 | 0.015295287 | Decrease_in_adherent dnaK; chaperone protein DnaK; K04043 molecular chaperone DnaK                                                                                                     | ctu:CTU_06390      |
| A1966_s_at      | -2.936621865 | 0.000180038 | Decrease_in_adherent yifE; hypothetical protein ; K09897 hypothetical protein                                                                                                          | sdj:SDY_3984       |
| F2712_s_at      | -2.935624865 | 0.002192354 | Decrease_in_adherent ucpA; short chain dehydrogenase (EC:1.-.-.-)                                                                                                                      | sbcb:SbBS512_E2798 |
| A3718_s_at      | -2.928554316 | 0.009221589 | Decrease_in_adherent yccJ; hypothetical protein                                                                                                                                        | sdj:SDY_0979       |
| S1023_s_at      | -2.925947262 | 0.002203759 | Decrease_in_adherent NO_KEGG_DATA                                                                                                                                                      | NO_KEGG_DATA       |
| A1281_s_at      | -2.92579627  | 0.010562667 | Decrease_in_adherent ygiU; serine/threonine transporter SstT ; K07862 serine/threonine transporter                                                                                     | sdj:SDY_3274       |
| c4709_at        | -2.920689014 | 0.001751487 | Decrease_in_adherent hypothetical protein ; K00973 glucose-1-phosphate thymidyltransferase [EC:2.7.7.24]                                                                               | cko:CKO_00130      |
| V3798_x_at      | -2.916281303 | 0.003659311 | Decrease_in_adherent yahO; hypothetical protein                                                                                                                                        | ej:ECO26_0367      |
| V0414_s_at      | -2.902840077 | 0.002081378 | Decrease_in_adherent fusA; elongation factor G ; K02355 elongation factor EF-G [EC:3.6.5.3]                                                                                            | sdj:SDY_3501       |
| EC869_1864_s_at | -2.901258773 | 0.014966731 | Decrease_in_adherent tktA; transketolase (EC:2.2.1.1); K00615 transketolase [EC:2.2.1.1]                                                                                               | sbcb:SbBS512_E3367 |
| V7054_s_at      | -2.900567666 | 0.000298955 | Decrease_in_adherent ynfJ; glucose-6-phosphate 1-dehydrogenase (EC:1.1.1.49); K00036 glucose-6-phosphate 1-dehydrogenase [EC:1.1.1.49]                                                 | sdj:SDY_1138       |
| A4340_s_at      | -2.891787392 | 0.012852865 | Decrease_in_adherent ynfG; 3-hydroxy acid dehydrogenase ; K00540 [EC:1.-.-.-]                                                                                                          | sdj:SDY_1586       |
| b1717_s_at      | -2.889806516 | 0.000791521 | Decrease_in_adherent hypothetical protein                                                                                                                                              | cko:CKO_01743      |
| V3384_s_at      | -2.886251945 | 0.014066382 | Decrease_in_adherent phosphoenolpyruvate synthase ; K01007 pyruvate, water dikinase [EC:2.7.9.2]                                                                                       | cko:CKO_01725      |
| APECO1_2795_at  | -2.883641423 | 0.014309106 | Decrease_in_adherent hypothetical protein                                                                                                                                              | cko:CKO_05114      |
| EC869_3591_s_at | -2.883223608 | 0.025881033 | Decrease_in_adherent glnH; glutamine ABC transporter periplasmic protein ; K10036 glutamine transport system substrate-binding protein                                                 | sbo:SBO_0702       |
| SDY_3461_x_at   | -2.88041489  | 0.035985556 | Decrease_in_adherent hypothetical protein ; K03747 Smg protein                                                                                                                         | cky:CKY_04697      |
| A2678_s_at      | -2.876786885 | 0.001355802 | Decrease_in_adherent caiF; DNA-binding transcriptional activator CaiF ; K08277 transcriptional activator CaiF                                                                          | sdj:SDY_0056       |
| A0065_at        | -2.867902275 | 0.002074908 | Decrease_in_adherent hypothetical protein                                                                                                                                              | ecw:EcE24377A_2321 |
| b3157_s_at      | -2.866982651 | 0.000478096 | Decrease_in_adherent yhbT; hypothetical protein                                                                                                                                        | sdj:SDY_3336       |
| V4616_s_at      | -2.866127433 | 0.000849161 | Decrease_in_adherent NO_KEGG_DATA                                                                                                                                                      | NO_KEGG_DATA       |
| A1402_s_at      | -2.863123096 | 0.021987985 | Decrease_in_adherent yhbH; putative sigma(54) modulation protein ; K05808 putative sigma-54 modulation protein                                                                         | sdj:SDY_3384       |
| b1256_s_at      | -2.860881759 | 0.006358326 | Decrease_in_adherent yoiD; outer membrane protein W ; K07275 outer membrane protein                                                                                                    | sdj:SDY_1320       |
| A3558_s_at      | -2.859861099 | 0.006559641 | Decrease_in_adherent clpA; ATP-dependent Clp protease ATP-binding subunit ; K03694 ATP-dependent Clp protease ATP-binding subunit ClpA                                                 | sdj:SDY_2379       |
| A2977_s_at      | -2.859789115 | 0.005637259 | Decrease_in_adherent yahK; putative oxidoreductase, Zn-dependent and NAD(P)-binding                                                                                                    | ecr:ECIAI1_0327    |
| F4391_s_at      | -2.85321169  | 0.010138216 | Decrease_in_adherent yilM; hypothetical protein                                                                                                                                        | eum:EUCUMN_4439    |
| ECs2281_at      | -2.850748666 | 0.004113936 | Decrease_in_adherent hypothetical protein                                                                                                                                              | eci:ECO111_1411    |
| ECs5510_s_at    | -2.849049156 | 0.002550214 | Decrease_in_adherent hypothetical protein                                                                                                                                              | ecp:ECP_2774       |
| V4298_s_at      | -2.847842938 | 0.002997493 | Decrease_in_adherent TrpR binding protein WrbA ; K03809 Trp repressor binding protein                                                                                                  | cko:CKO_02047      |
| SB5_3624_s_at   | -2.842851809 | 0.007626547 | Decrease_in_adherent NO_KEGG_DATA                                                                                                                                                      | NO_KEGG_DATA       |
| A1088_at        | -2.838928288 | 0.005533592 | Decrease_in_adherent UvrD family helicase ; K03657 DNA helicase II / ATP-dependent DNA helicase PcrA [EC:3.6.1.-]                                                                      | ecw:EcE24377A_3362 |
| ECs2754_x_at    | -2.836351318 | 0.026569048 | Decrease_in_adherent putative prophage maintenance protein                                                                                                                             | ej:ECO26_1476      |
| A4482_s_at      | -2.834907293 | 0.000706639 | Decrease_in_adherent lpp; murein lipoprotein ; K06078 murein lipoprotein                                                                                                               | sdj:SDY_1908       |
| A2355_s_at      | -2.832467286 | 0.007652251 | Decrease_in_adherent dcaA; anaerobic C4-dicarboxylate transporter ; K07791 anaerobic C4-dicarboxylate transporter DcuA                                                                 | sdj:SDY_4443       |
| SD1_2489_s_at   | -2.823151239 | 0.008341555 | Decrease_in_adherent hypothetical protein                                                                                                                                              | ecv:APECO1_2541    |
| F3644_x_at      | -2.815481042 | 0.014266909 | Decrease_in_adherent hypothetical protein ; K03747 Smg protein                                                                                                                         | cko:CKO_04697      |
| b3024_s_at      | -2.813347017 | 0.025968021 | Decrease_in_adherent ygiW; hypothetical protein                                                                                                                                        | sdj:SDY_3215       |
| V3388_s_at      | -2.808240806 | 0.009165315 | Decrease_in_adherent ppsA; phosphoenolpyruvate synthase (EC:2.7.9.2); K01007 pyruvate, water dikinase [EC:2.7.9.2]                                                                     | sbo:SBO_1427       |
| b3612_s_at      | -2.80722681  | 0.002403118 | Decrease_in_adherent NO_KEGG_DATA                                                                                                                                                      | NO_KEGG_DATA       |



|                     |              |             |                                                                                                                                                                                       |                    |
|---------------------|--------------|-------------|---------------------------------------------------------------------------------------------------------------------------------------------------------------------------------------|--------------------|
| SD1_2134_s_at       | -2.639823105 | 0.017692996 | Decrease_in_adherent vacJ; lipoprotein precursor ; K04754 lipoprotein                                                                                                                 | sdv:SDY_2550       |
| SD1_2139_s_at       | -2.639759078 | 0.046083148 | Decrease_in_adherent NO_KEGG_DATA                                                                                                                                                     | NO_KEGG_DATA       |
| V2498_s_at          | -2.639727895 | 0.001064606 | Decrease_in_adherent mlc; putative NAGC-like transcriptional regulator                                                                                                                | sdv:SDY_1562       |
| SD1_1883_s_at       | -2.638343429 | 0.001093768 | Decrease_in_adherent lipA; lipoyl synthase ; K03644 lipoyl acid synthetase [EC:2.8.1.8]                                                                                               | sdv:SDY_0550       |
| A1497_s_at          | -2.63073317  | 0.003427909 | Decrease_in_adherent hypothetical protein                                                                                                                                             | eci:UTI89_C3763    |
| b0426_s_at          | -2.629886116 | 0.001508987 | Decrease_in_adherent putative nucleotide-binding protein ; K09767 hypothetical protein                                                                                                | sbc:SbBS512_E0348  |
| A3297_s_at          | -2.62794598  | 0.014758828 | Decrease_in_adherent gltK; glutamate/aspartate ABC transporter, permease protein GltK ; K10002 glutamate/aspartate transport system permease protein                                  | ecw:EcE24377A_0681 |
| b3303_s_at          | -2.624436183 | 0.01208169  | Decrease_in_adherent hypothetical protein                                                                                                                                             | ecv:c4064          |
| EC869_6406_s_at     | -2.620166619 | 0.044180631 | Decrease_in_adherent melF; 5,10-methylenetetrahydrofolate reductase (EC:1.5.1.20); K00297 methylenetetrahydrofolate reductase (NADPH) [EC:1.5.1.20]                                   | ctu:Clu_01820      |
| M2693_s_at          | -2.6195252   | 0.013216977 | Decrease_in_adherent NO_KEGG_DATA                                                                                                                                                     | NO_KEGG_DATA       |
| AFFX-LysX_3_at      | -2.618928454 | 0.000415299 | Decrease_in_adherent lysA; diaminopimelate decarboxylase (EC:4.1.1.20); K01586 diaminopimelate decarboxylase [EC:4.1.1.20]                                                            | bsu:BSU23380       |
| EC869_6416_s_at     | -2.618590333 | 0.002304387 | Decrease_in_adherent melB; cystathionine gamma-synthase, PLP-dependent; K01739 cystathionine gamma-synthase [EC:2.5.1.48]                                                             | etw:ECSP_5009      |
| A3035_s_at          | -2.616545114 | 0.0175695   | Decrease_in_adherent psiF; induced by phosphate starvation                                                                                                                            | sdv:SDY_0360       |
| V6500_s_at          | -2.616135394 | 0.002894896 | Decrease_in_adherent fabI; enoyl-(acyl carrier protein) reductase (EC:1.3.1.10); K00208 enoyl-[acyl-carrier protein] reductase I [EC:1.3.1.9]                                         | sdv:SDY_1368       |
| EC869_6165_s_at     | -2.61452371  | 0.001284896 | Decrease_in_adherent NO_KEGG_DATA                                                                                                                                                     | NO_KEGG_DATA       |
| AFFX-PheX_3_at      | -2.613938914 | 0.000364308 | Decrease_in_adherent pheA; prephenate dehydratase (EC:4.2.1.51); K04518 prephenate dehydratase [EC:4.2.1.51]                                                                          | bsu:BSU27900       |
| SD1_1375_s_at       | -2.603734307 | 0.020491186 | Decrease_in_adherent purL; phosphoribosylformylglycinamide synthase (EC:6.3.5.3); K01952 phosphoribosylformylglycinamide synthase [EC:6.3.5.3]                                        | sbc:SbBS512_E2922  |
| AFFX-r2-Bs-lys-5_at | -2.602691793 | 2.19E-05    | Decrease_in_adherent lysA; diaminopimelate decarboxylase (EC:4.1.1.20); K01586 diaminopimelate decarboxylase [EC:4.1.1.20]                                                            | bsu:BSU23380       |
| b0865_s_at          | -2.602588416 | 0.006055243 | Decrease_in_adherent ybjP; putative lipoprotein                                                                                                                                       | eqj:ECO26_0992     |
| c1138_s_at          | -2.601740979 | 0.002340162 | Decrease_in_adherent hypothetical protein                                                                                                                                             | ecc:c1138          |
| A2889_s_at          | -2.601712826 | 4.89E-05    | Decrease_in_adherent ykE; C-lysozyme inhibitor                                                                                                                                        | sdv:SDY_0246       |
| V0315_s_at          | -2.600069119 | 0.025261431 | Decrease_in_adherent pgi; glucose-6-phosphate isomerase (EC:5.3.1.9); K01810 glucose-6-phosphate isomerase [EC:5.3.1.9]                                                               | sdv:SDY_4226       |
| EC869_5719_s_at     | -2.598553022 | 0.005941658 | Decrease_in_adherent pntB; pyridine nucleotide transhydrogenase (EC:1.6.1.2); K00325 NAD(P) transhydrogenase subunit beta [EC:1.6.1.2]                                                | sdv:SDY_1551       |
| V5399_s_at          | -2.595907971 | 0.00256853  | Decrease_in_adherent glgC; glucose-1-phosphate adenyllyltransferase (EC:2.7.7.27); K00975 glucose-1-phosphate adenyllyltransferase [EC:2.7.7.27]                                      | sdv:SDY_3576       |
| c2315_s_at          | -2.590188942 | 4.17E-05    | Decrease_in_adherent yecI; ferritin-like protein ; K02255 ferritin-like protein 2                                                                                                     | sdv:SDY_1116       |
| D2423_x_at          | -2.585971656 | 0.001307666 | Decrease_in_adherent NO_KEGG_DATA                                                                                                                                                     | NO_KEGG_DATA       |
| A3985_s_at          | -2.584409024 | 0.025662464 | Decrease_in_adherent oppD; oligopeptide transporter ATP-binding component ; K02031 peptide/nickel transport system ATP-binding protein                                                | sbc:SbBS512_E1415  |
| SD1_2503_s_at       | -2.580672611 | 0.00319687  | Decrease_in_adherent pfkA; 6-phosphofructokinase (EC:2.7.1.11); K00850 6-phosphofructokinase [EC:2.7.1.11]                                                                            | sdv:SDY_3831       |
| SD1_1168_s_at       | -2.58002785  | 0.000738907 | Decrease_in_adherent ucpA; putative oxidoreductase                                                                                                                                    | eqj:ECO26_3478     |
| EC869_3855_s_at     | -2.574389758 | 0.001234878 | Decrease_in_adherent NO_KEGG_DATA                                                                                                                                                     | NO_KEGG_DATA       |
| b1136_s_at          | -2.574148857 | 0.003312238 | Decrease_in_adherent hypothetical protein                                                                                                                                             | ecc:c1516          |
| V0081_s_at          | -2.572832213 | 0.011743747 | Decrease_in_adherent dcuB; anaerobic C4-dicarboxylate transporter ; K07792 anaerobic C4-dicarboxylate transporter DcuB                                                                | sdv:SDY_4232       |
| A4234_s_at          | -2.571679318 | 0.005368689 | Decrease_in_adherent pptA; 4-oxalocrotonate tautomerase; K01821 4-oxalocrotonate tautomerase [EC:5.3.2.-]                                                                             | eci:ECO111_1852    |
| b3472_s_at          | -2.569013985 | 0.008393273 | Decrease_in_adherent hypothetical protein                                                                                                                                             | sdv:SDY_3623       |
| EC869_3090_s_at     | -2.567653978 | 0.007843366 | Decrease_in_adherent acetyl-coenzyme A synthetase (EC:6.2.1.1); K01895 acetyl-CoA synthetase [EC:6.2.1.1]                                                                             | sbc:SbBS512_E4588  |
| EC869_7448_s_at     | -2.56510116  | 0.00380562  | Decrease_in_adherent nagB; glucosamine-6-phosphate deaminase (EC:3.5.99.6); K02564 glucosamine-6-phosphate deaminase [EC:3.5.99.6]                                                    | sbc:SbBS512_E0573  |
| A4642_s_at          | -2.56187326  | 0.002780863 | Decrease_in_adherent putative regulator                                                                                                                                               | ssn:SSON_1334      |
| A2459_s_at          | -2.557541198 | 0.042420365 | Decrease_in_adherent NO_KEGG_DATA                                                                                                                                                     | NO_KEGG_DATA       |
| SD1_2927_s_at       | -2.553977577 | 0.023715306 | Decrease_in_adherent ydaA; universal stress protein UspE                                                                                                                              | sdv:SDY_1413       |
| M0375_s_at          | -2.553611258 | 0.002765463 | Decrease_in_adherent ptsI; phosphoenolpyruvate-protein phosphotransferase (EC:2.7.3.9); K08483 phosphotransferase system, enzyme I, PtsI [EC:2.7.3.9]                                 | sdv:SDY_2613       |
| AFFX-r2-Bs-lys-M_a  | -2.550653517 | 5.34E-09    | Decrease_in_adherent lysA; diaminopimelate decarboxylase (EC:4.1.1.20); K01586 diaminopimelate decarboxylase [EC:4.1.1.20]                                                            | bsu:BSU23380       |
| b3236_s_at          | -2.546471893 | 0.010317415 | Decrease_in_adherent mdh; malate dehydrogenase (EC:1.1.1.37); K00026 malate dehydrogenase [EC:1.1.1.37]                                                                               | sdv:SDY_3412       |
| V3863_s_at          | -2.545359328 | 0.003037445 | Decrease_in_adherent ybgE; hypothetical protein                                                                                                                                       | sdv:SDY_0683       |
| A2847_s_at          | -2.543983572 | 0.010864283 | Decrease_in_adherent D-methionine transporter permease subunit ; K02072 D-methionine transport system permease protein                                                                | ent:Ent638_0736    |
| APECO1_3736_s_at    | -2.543490385 | 0.029734337 | Decrease_in_adherent ygdH; hypothetical protein ; K06966                                                                                                                              | sbo:SBO_2676       |
| SD1_2453_s_at       | -2.542815722 | 5.96E-05    | Decrease_in_adherent ppc; phosphoenolpyruvate carboxylase (EC:4.1.1.31); K01595 phosphoenolpyruvate carboxylase [EC:4.1.1.31]                                                         | ssn:SSON_4129      |
| AFFX-r2-Bs-phe-M_i  | -2.542761754 | 3.28E-05    | Decrease_in_adherent pheA; prephenate dehydratase (EC:4.2.1.51); K04518 prephenate dehydratase [EC:4.2.1.51]                                                                          | bsu:BSU27900       |
| EC869_7770_x_at     | -2.539109707 | 0.000878153 | Decrease_in_adherent lplA; lipoate-protein ligase A (EC:6.3.2.-); K03800 lipoate-protein ligase A [EC:2.7.7.63]                                                                       | sbc:SbBS512_E4933  |
| b1881_s_at          | -2.538490403 | 0.001829204 | Decrease_in_adherent cheZ; chemotaxis regulator CheZ ; K03414 chemotaxis protein CheZ                                                                                                 | sbc:SbBS512_E2174  |
| AFFX-r2-Bs-phe-3_a  | -2.537057096 | 0.000146353 | Decrease_in_adherent pheA; prephenate dehydratase (EC:4.2.1.51); K04518 prephenate dehydratase [EC:4.2.1.51]                                                                          | bsu:BSU27900       |
| A1498_s_at          | -2.536908246 | 0.000235181 | Decrease_in_adherent rpsC; 30S ribosomal protein S3 ; K02982 small subunit ribosomal protein S3                                                                                       | cko:CKO_04729      |
| A1915_s_at          | -2.535116901 | 4.78E-07    | Decrease_in_adherent NADPH-dependent FMN reductase                                                                                                                                    | sbc:SbBS512_E4209  |
| F1834_s_at          | -2.531704673 | 0.005694942 | Decrease_in_adherent transcriptional regulator SlyA ; K06075 MarR family transcriptional regulator, transcriptional regulator for hemolysin                                           | cko:CKO_01654      |
| EC869_1180_s_at     | -2.527300432 | 0.007340837 | Decrease_in_adherent glucose-specific PTS system IIBC components ; K02778 PTS system, glucose-specific IIB component [EC:2.7.1.69]; K02779 PTS system, glucose-specific IIC component | cko:CKO_01957      |
| A4480_s_at          | -2.526538977 | 0.012556603 | Decrease_in_adherent hypothetical protein                                                                                                                                             | sdv:SDY_1904       |
| SD1_0883_s_at       | -2.524504102 | 0.013694934 | Decrease_in_adherent yncE; hypothetical protein                                                                                                                                       | eci:ECO103_1583    |
| AFFX-LysX_5_at      | -2.51751688  | 0.000212034 | Decrease_in_adherent lysA; diaminopimelate decarboxylase (EC:4.1.1.20); K01586 diaminopimelate decarboxylase [EC:4.1.1.20]                                                            | bsu:BSU23380       |
| ECs1080_x_at        | -2.517463769 | 0.018378288 | Decrease_in_adherent prophage maintenance protein                                                                                                                                     | ecs:ECs1080        |
| b0623_s_at          | -2.517401322 | 0.010546296 | Decrease_in_adherent cspE; cold shock protein CspE ; K03704 cold shock protein (beta-ribbon, CspA family)                                                                             | cko:CKO_02534      |
| SBS_2639_s_at       | -2.513153011 | 0.048315171 | Decrease_in_adherent hypothetical protein ; K07180 serine protein kinase                                                                                                              | cko:CKO_01806      |
| A2361_s_at          | -2.506915608 | 0.001350436 | Decrease_in_adherent groEL; chaperonin GroEL ; K04077 chaperonin GroEL                                                                                                                | sdv:SDY_4449       |
| D0357_x_at          | -2.505176011 | 0.000886361 | Decrease_in_adherent NO_KEGG_DATA                                                                                                                                                     | NO_KEGG_DATA       |
| A0066_at            | -2.503729761 | 0.00269988  | Decrease_in_adherent hypothetical protein                                                                                                                                             | ecw:EcE24377A_2322 |
| c2930_s_at          | -2.498497824 | 0.000691228 | Decrease_in_adherent hypothetical protein                                                                                                                                             | sbc:SbBS512_E2759  |
| ECs5520_s_at        | -2.496786433 | 0.002662207 | Decrease_in_adherent hypothetical protein                                                                                                                                             | ecv:ECSE_3407      |
| EC536_4089_s_at     | -2.494905582 | 0.008266137 | Decrease_in_adherent pgi; glucose-6-phosphate isomerase (EC:5.3.1.9); K01810 glucose-6-phosphate isomerase [EC:5.3.1.9]                                                               | sdv:SDY_4226       |
| b4232_s_at          | -2.492779392 | 0.006425263 | Decrease_in_adherent fbp; fructose-1,6-bisphosphatase (EC:3.1.3.11); K03841 fructose-1,6-bisphosphatase I [EC:3.1.3.11]                                                               | sdv:SDY_4250       |
| H4105_s_at          | -2.491230648 | 0.03751976  | Decrease_in_adherent aphA; acid phosphatase/phosphotransferase (EC:3.1.3.2); K03788 acid phosphatase (class B) [EC:3.1.3.2]                                                           | ecr:ECIAI_4287     |
| V2352_s_at          | -2.48910217  | 0.000859347 | Decrease_in_adherent ppnK; inorganic polyphosphate/ATP-NAD kinase (EC:2.7.1.23); K00858 NAD+ kinase [EC:2.7.1.23]                                                                     | efe:EFER_0458      |
| N0912_s_at          | -2.488734034 | 0.021740295 | Decrease_in_adherent NO_KEGG_DATA                                                                                                                                                     | NO_KEGG_DATA       |
| EC869_8209_s_at     | -2.4887014   | 0.002377852 | Decrease_in_adherent transketolase (EC:2.2.1.1); K00615 transketolase [EC:2.2.1.1]                                                                                                    | ecs:ECs327         |
| F2636_s_at          | -2.485409956 | 0.01377796  | Decrease_in_adherent NO_KEGG_DATA                                                                                                                                                     | NO_KEGG_DATA       |
| SD1_2776_s_at       | -2.48389082  | 7.07E-05    | Decrease_in_adherent nadE; NH(3)-dependent Nad(+) synthetase                                                                                                                          | elf:LF82_1436      |
| A2908_s_at          | -2.483544008 | 0.011616657 | Decrease_in_adherent crl; DNA-binding transcriptional regulator Crl ; K11926 sigma factor-binding protein Crl                                                                         | sdv:SDY_0477       |

pCoo004\_s\_at -2.480522655 0.005935204 Decrease\_in\_adherent hypothetical protein  
H1841\_x\_at -2.477265522 6.14E-05 Decrease\_in\_adherent hypothetical protein  
SD1\_2578\_s\_at -2.474591669 0.004023435 Decrease\_in\_adherent polA; DNA polymerase I [EC:2.7.7.7]; K02335 DNA polymerase I [EC:2.7.7.7]  
A0020\_s\_at -2.474580588 0.00526998 Decrease\_in\_adherent hypothetical protein  
V5964\_s\_at -2.474158199 0.046250179 Decrease\_in\_adherent glnG; nitrogen regulation protein NR(I); K07712 two-component system, NtrC family, nitrogen regulation response regulator GlnG  
ECs1520\_x\_at -2.473976443 0.033421352 Decrease\_in\_adherent mtkP; putative cell killing protein encoded within cryptic prophage CP-933P  
SD1\_3096\_s\_at -2.471034945 0.001276722 Decrease\_in\_adherent hypothetical protein  
EC869\_8742\_s\_at -2.466961678 0.017145993 Decrease\_in\_adherent ppsA; phosphoenolpyruvate synthase (EC:2.7.9.2); K01007 pyruvate, water dikinase [EC:2.7.9.2]  
EC869\_2608\_s\_at -2.460294001 0.043243698 Decrease\_in\_adherent flhD; DNA-binding transcriptional dual regulator with FlhC; K02403 flagellar transcriptional activator FlhD  
EC869\_4578\_s\_at -2.4519848 0.027538844 Decrease\_in\_adherent gloB; hydroxyacylglutathione hydrolase (EC:3.1.2.6); K01069 hydroxyacylglutathione hydrolase [EC:3.1.2.6]  
b1508\_s\_at -2.446660857 0.044270717 Decrease\_in\_adherent hipB; DNA-binding transcriptional regulator HipB  
A3719\_s\_at -2.446248232 0.013597291 Decrease\_in\_adherent wrbA; TrpR binding protein WrbA; K03809 Trp repressor binding protein  
b2926\_s\_at -2.444700641 0.00060472 Decrease\_in\_adherent pgk; phosphoglycerate kinase (EC:2.7.2.3); K00927 phosphoglycerate kinase [EC:2.7.2.3]  
b3916\_s\_at -2.43734698 0.007284209 Decrease\_in\_adherent pfkA; 6-phosphofructokinase (EC:2.7.1.11); K00850 6-phosphofructokinase [EC:2.7.1.11]  
V3541\_s\_at -2.430314047 0.020684538 Decrease\_in\_adherent acrD; aminoglycoside/multidrug efflux system; K03296 hydrophobic/amphiphilic exporter-1 (mainly G- bacteria), HAE1 family  
SD1\_2474\_s\_at -2.428472523 0.008153833 Decrease\_in\_adherent methionine repressor, MetJ; K03764 transcriptional repressor of met regulon (beta-ribbon, MetJ family)  
EC869\_5640\_s\_at -2.411121009 0.011353368 Decrease\_in\_adherent cpdB; bifunctional 2',3'-cyclic nucleotide 2'-phosphodiesterase/3'-nucleotidase periplasmic precursor protein; K01119 2',3'-cyclic-nucleotide 2'-phosphodiesterase [EC:3.1.1.11]  
V4568\_s\_at -2.408195269 0.019874977 Decrease\_in\_adherent anaerobic ribonucleoside triphosphate reductase (EC:1.17.4.2); K00527 ribonucleoside-triphosphate reductase [EC:1.17.4.2]  
A0712\_s\_at -2.406160608 0.001773851 Decrease\_in\_adherent ygaG; S-ribosylhomocysteine lyase; K07173 S-ribosylhomocysteine lyase [EC:4.4.1.21]  
V7336\_s\_at -2.406096903 1.85E-06 Decrease\_in\_adherent hypothetical protein  
AFFX-LysX-M\_at -2.403903818 0.000287411 Decrease\_in\_adherent ysaA; diaminopimelate decarboxylase (EC:4.1.1.20); K01586 diaminopimelate decarboxylase [EC:4.1.1.20]  
SD1\_3346\_s\_at -2.402186196 0.029408389 Decrease\_in\_adherent ycbB; hypothetical protein  
c3307\_s\_at -2.399795175 0.009711536 Decrease\_in\_adherent RNA polymerase sigma factor RpoS; K03087 RNA polymerase nonessential primary-like sigma factor  
b2572\_s\_at -2.399010771 0.0136524 Decrease\_in\_adherent rseA; anti-RNA polymerase sigma factor SigE; K03597 sigma-E factor negative regulatory protein RseA  
D3045\_s\_at -2.396157237 0.009291479 Decrease\_in\_adherent NO\_KEGG\_DATA  
SBO\_3336\_s\_at -2.392690115 0.034307982 Decrease\_in\_adherent yhfA; hypothetical protein; K07397 putative redox protein  
V3865\_s\_at -2.391886985 0.002084674 Decrease\_in\_adherent hypothetical protein  
AFFX-r2-Bs-thr-3\_s\_ -2.387019069 0.000153193 Decrease\_in\_adherent thrB; homoserine kinase (EC:2.7.1.39); K00872 homoserine kinase [EC:2.7.1.39]  
V3386\_s\_at -2.382721808 0.007767569 Decrease\_in\_adherent ppsA; phosphoenolpyruvate synthase (EC:2.7.9.2); K01007 pyruvate, water dikinase [EC:2.7.9.2]  
V5379\_s\_at -2.381844155 0.001788655 Decrease\_in\_adherent yhhX; putative dehydrogenase  
A2811\_s\_at -2.380012901 0.01769734 Decrease\_in\_adherent yaeH; hypothetical protein  
b1676\_s\_at -2.378695389 0.014626141 Decrease\_in\_adherent pykF; pyruvate kinase (EC:2.7.1.40); K00873 pyruvate kinase [EC:2.7.1.40]  
A4644\_s\_at -2.377656647 0.014642896 Decrease\_in\_adherent htpX; heat shock protein HtpX; K03799 heat shock protein HtpX [EC:3.4.24.-]  
V4294\_s\_at -2.376901484 0.004467681 Decrease\_in\_adherent NO\_KEGG\_DATA  
SFV\_2948\_s\_at -2.376386907 0.023149163 Decrease\_in\_adherent yqfB; hypothetical protein; K09900 hypothetical protein  
F3660\_s\_at -2.37570042 0.001666666 Decrease\_in\_adherent NO\_KEGG\_DATA  
b3409\_s\_at -2.374369893 8.05E-05 Decrease\_in\_adherent feoB; ferrous iron transport protein B; K04759 ferrous iron transport protein B  
A4412\_s\_at -2.373758154 0.014291091 Decrease\_in\_adherent ydgA; hypothetical protein  
N1415\_x\_at -2.366559575 1.12E-06 Decrease\_in\_adherent yjgD; hypothetical protein; K09893 hypothetical protein  
A1819\_s\_at -2.366583868 0.008142245 Decrease\_in\_adherent waaW; lipopolysaccharide 1,2-galactosyltransferase; K12985 (galactosyl)LPS 1,2-glucosyltransferase [EC:2.4.1.-]  
SF3597\_s\_at -2.363840347 0.000552015 Decrease\_in\_adherent yhlV; putative transport system permease protein; K03296 hydrophobic/amphiphilic exporter-1 (mainly G- bacteria), HAE1 family  
ECP\_3075\_s\_at -2.363624669 0.003565199 Decrease\_in\_adherent hypothetical protein; K11209 GST-like protein  
A0436\_s\_at -2.362326206 0.000812695 Decrease\_in\_adherent ptsH; phosphocarrier protein HPr (EC:2.7.1.69 2.7.3.9); K02784 phosphocarrier protein HPr  
A2371\_s\_at -2.362166787 0.030348948 Decrease\_in\_adherent bci; outer membrane lipoprotein Blc; K03098 outer membrane lipoprotein Blc  
V1199\_s\_at -2.358902381 0.005311381 Decrease\_in\_adherent ycbB; hypothetical protein  
EC869\_6407\_s\_at -2.357332562 0.024940913 Decrease\_in\_adherent metF; 5,10-methylenetetrahydrofolate reductase (EC:1.5.1.20); K00297 methylenetetrahydrofolate reductase (NADPH) [EC:1.5.1.20]  
c0735\_s\_at -2.353416461 0.034567272 Decrease\_in\_adherent rihA; ribonucleoside hydrolase 1 (EC:3.2.2.-); K01250 pyrimidine-specific ribonucleoside hydrolase [EC:3.2.-.-]  
SD1\_1706\_s\_at -2.35243886 0.011785003 Decrease\_in\_adherent secF; preprotein translocase subunit SecF; K03074 preprotein translocase subunit SecF  
EC869\_7314\_s\_at -2.346540842 0.003698716 Decrease\_in\_adherent tsx; nucleoside channel; K05517 nucleoside-specific channel-forming protein  
V5386\_s\_at -2.343627029 0.000197993 Decrease\_in\_adherent NO\_KEGG\_DATA  
V3441\_x\_at -2.336184765 0.00694572 Decrease\_in\_adherent yfeK; hypothetical protein  
SF1458\_s\_at -2.335421738 0.003139214 Decrease\_in\_adherent hypothetical protein  
A2648\_s\_at -2.331993499 0.006902087 Decrease\_in\_adherent NO\_KEGG\_DATA  
ECP\_1632\_s\_at -2.330303518 0.014179316 Decrease\_in\_adherent hypothetical protein  
EC869\_2830\_s\_at -2.330300248 0.001047846 Decrease\_in\_adherent purA; adenylosuccinate synthetase (EC:6.3.4.4); K01939 adenylosuccinate synthase [EC:6.3.4.4]  
A4547\_s\_at -2.328898179 0.02491143 Decrease\_in\_adherent osmE; DNA-binding transcriptional activator OsmE; K04064 osmotically inducible lipoprotein OsmE  
b0880\_s\_at -2.326835958 0.026988106 Decrease\_in\_adherent cspD; stationary phase/starvation inducible regulatory protein CspD; K03704 cold shock protein (beta-ribbon, CspA family)  
V1193\_s\_at -2.325627223 0.002354577 Decrease\_in\_adherent aromatic amino acid aminotransferase; K00813 aspartate aminotransferase [EC:2.6.1.1]  
A0302\_s\_at -2.317398738 0.011917654 Decrease\_in\_adherent menB; naphthoate synthase (EC:4.1.3.36); K01661 naphthoate synthase [EC:4.1.3.36]  
AFFX-PheX-5\_at -2.317219127 9.36E-05 Decrease\_in\_adherent pheB; hypothetical protein; K06209 chorismate mutase [EC:5.4.99.5]  
A0306\_s\_at -2.313833603 0.03676709 Decrease\_in\_adherent eiaB; hypothetical protein; K05594 EiaB protein  
b3609\_s\_at -2.309074641 5.82E-05 Decrease\_in\_adherent secB; preprotein translocase subunit SecB; K03071 preprotein translocase subunit SecB  
b0965\_s\_at -2.308863277 0.001658987 Decrease\_in\_adherent hypothetical protein; K06929  
A4534\_s\_at -2.306487819 0.016407944 Decrease\_in\_adherent hypothetical protein  
V2075\_s\_at -2.305342833 0.013541815 Decrease\_in\_adherent yglJ; serine/threonine transporter SstT; K07862 serine/threonine transporter  
F2998\_s\_at -2.305255633 0.001497602 Decrease\_in\_adherent hypB; hydrogenase nickel incorporation protein HypB; K04652 hydrogenase nickel incorporation protein HypB  
ECP\_1856\_at -2.304933751 0.001055333 Decrease\_in\_adherent hypothetical protein  
SFV\_4273\_s\_at -2.298581703 0.029576602 Decrease\_in\_adherent cysQ; adenosine-3'(2'),5'-bisphosphate nucleotidase; K03677 CysQ protein  
EC869\_5670\_s\_at -2.296499837 0.000315677 Decrease\_in\_adherent luxS; S-ribosylhomocysteine lyase; K07173 S-ribosylhomocysteine lyase [EC:4.4.1.21]  
EC869\_1014\_s\_at -2.296435843 5.55E-06 Decrease\_in\_adherent purF; amidophosphoribosyltransferase (EC:2.4.2.14); K00764 amidophosphoribosyltransferase [EC:2.4.2.14]  
b0876\_s\_at -2.2963891 0.022983195 Decrease\_in\_adherent hypothetical protein; K07459 putative ATP-dependent endonuclease of the OLD family  
EC869\_8934\_s\_at -2.295921448 0.006752962 Decrease\_in\_adherent yihI; hypothetical protein; K09894 hypothetical protein  
A3442\_s\_at -2.294717757 0.009068283 Decrease\_in\_adherent putative kinase inhibitor protein; K06910  
AFFX-ThrX-3\_at -2.294306671 4.18E-05 Decrease\_in\_adherent thrB; homoserine kinase (EC:2.7.1.39); K00872 homoserine kinase [EC:2.7.1.39]

ecw:EcE24377A\_D0044  
ecx:EcHS\_A1898  
sbc:SbBS512\_E4337  
ssn:SSON\_2055  
sbc:SbBS512\_E4344  
etw:ECCSP\_2125  
ecc:c4772  
sbc:SbBS512\_E1905  
etw:ECCSP\_2466  
sbc:SbBS512\_E0208  
ssn:SSON\_1613  
sdy:SDY\_0980  
sbo:SBO\_3067  
sdy:SDY\_3831  
ssn:SSON\_2550  
dze:Dd1591\_0119  
sbc:CKO\_03616  
ppr:PBPB0442  
sdy:SDY\_2884  
eti:UTI89\_C3749  
bsu:BSU23380  
sdy:SDY\_2332  
sfi:SF2764  
sdy:SDY\_2813  
NO\_KEGG\_DATA  
sdy:SDY\_3518  
ecc:c0813  
bsu:BSU32240  
sdy:SDY\_1794  
ssn:SSON\_3682  
sdy:SDY\_0181  
sbc:SbBS512\_E1877  
sdy:SDY\_1977  
NO\_KEGG\_DATA  
sdy:SDY\_3181  
NO\_KEGG\_DATA  
sbc:SbBS512\_E3790  
ssn:SSON\_1546  
sdy:SDY\_4277  
sbc:SbBS512\_E4051  
sdy:SDY\_3537  
ecc:ECP\_3075  
ctu:CTu\_30130  
ssn:SSON\_4335  
sdy:SDY\_2332  
spe:Spro\_4784  
ecc:ECS88\_0686  
eti:ETA\_E0962  
sdy:SDY\_0323  
NO\_KEGG\_DATA  
sbo:SBO\_2445  
sbc:SbBS512\_E2020  
NO\_KEGG\_DATA  
sdy:SDY\_1673  
sdy:SDY\_4412  
sdy:SDY\_1541  
sdy:SDY\_2381  
cko:CKO\_02139  
efe:EFER\_0906  
bsu:BSU27910  
sdy:SDY\_2462  
sbc:SbBS512\_E4037  
sdy:SDY\_0940  
sdy:SDY\_1818  
sbc:SbBS512\_E3150  
ecc:ECP\_1856  
sfv:SFV\_4273  
sbo:SBO\_3634  
sbc:SbBS512\_E2690  
sbc:SbBS512\_E2452  
sdy:SDY\_3877  
sbc:SbBS512\_E2579  
bsu:BSU32240

|                    |              |             |                                                                                                                                                                                                                       |                   |
|--------------------|--------------|-------------|-----------------------------------------------------------------------------------------------------------------------------------------------------------------------------------------------------------------------|-------------------|
| V0714_s_at         | -2.294018113 | 0.005100374 | Decrease_in_adherent mglB; galactose-binding transport protein ; K10540 methyl-galactoside transport system substrate-binding protein                                                                                 | sdv:SDY_2130      |
| A0547_s_at         | -2.290970138 | 0.033779565 | Decrease_in_adherent sseB; enhanced serine sensitivity protein SseB                                                                                                                                                   | sbv:SBBS512_E2897 |
| A4633_s_at         | -2.288385293 | 0.002767441 | Decrease_in_adherent manX; PTS system, mannose-specific IIB component [EC:2.7.1.69]; K02793 PTS system, mannose-specific IIA component [EC:2.7.1.69]; K02794 PTS system, mannose-specific IIC component [EC:2.7.1.69] | sbv:SBBS512_E2083 |
| Z6074_s_at         | -2.286913114 | 0.006964522 | Decrease_in_adherent hypothetical protein                                                                                                                                                                             | eqj:EC026_2665    |
| A0371_s_at         | -2.286786585 | 0.021382582 | Decrease_in_adherent NO_KEGG_DATA                                                                                                                                                                                     | NO_KEGG_DATA      |
| AFFX-PheX-M_at     | -2.285173313 | 5.18E-05    | Decrease_in_adherent pheA; prephenate dehydratase (EC:4.2.1.51); K04518 prephenate dehydratase [EC:4.2.1.51]                                                                                                          | bsu:BSU27900      |
| SD1_1948_s_at      | -2.285066332 | 0.010339558 | Decrease_in_adherent htpG; heat shock protein 90 ; K04079 molecular chaperone HtpG                                                                                                                                    | sdv:SDY_0446      |
| V5329_s_at         | -2.282472362 | 0.017873657 | Decrease_in_adherent hypothetical protein                                                                                                                                                                             | cko:CKO_04902     |
| A4021_at           | -2.279124017 | 0.005903997 | Decrease_in_adherent hypothetical protein                                                                                                                                                                             | ecw:EC24377A_1430 |
| A2395_s_at         | -2.276758918 | 0.001217195 | Decrease_in_adherent purA; adenylosuccinate synthetase (EC:6.3.4.4); K01939 adenylosuccinate synthase [EC:6.3.4.4]                                                                                                    | sdv:SDY_4412      |
| EC869_5658_s_at    | -2.274800806 | 3.01E-05    | Decrease_in_adherent fklB; peptidyl-prolyl cis-trans isomerase (EC:5.2.1.8); K03773 FKBP-type peptidyl-prolyl cis-trans isomerase FklB [EC:5.2.1.8]                                                                   | sdv:SDY_4377      |
| SD1_0131_s_at      | -2.273423467 | 0.000402844 | Decrease_in_adherent secB; preprotein translocase subunit SecB ; K03071 preprotein translocase subunit SecB                                                                                                           | sdv:SDY_4042      |
| SB5_0712_s_at      | -2.271681459 | 3.11E-05    | Decrease_in_adherent qor; quinone oxidoreductase, NADPH-dependent (EC:1.6.5.5); K00344 NADPH2:quinone reductase [EC:1.6.5.5]                                                                                          | ect:ECIAI39_4471  |
| A4727_s_at         | -2.271235179 | 0.018748189 | Decrease_in_adherent yecA; hypothetical protein ; K07039                                                                                                                                                              | sbv:SBBS512_E0654 |
| EC869_4316_s_at    | -2.268362471 | 0.001091541 | Decrease_in_adherent serA; D-3-phosphoglycerate dehydrogenase ; K00058 D-3-phosphoglycerate dehydrogenase [EC:1.1.1.95]                                                                                               | sdv:SDY_3169      |
| A2158_s_at         | -2.268149858 | 0.044065762 | Decrease_in_adherent metF; 5,10-methylenetetrahydrofolate reductase (EC:1.5.1.20); K00297 methylenetetrahydrofolate reductase (NADPH) [EC:1.5.1.20]                                                                   | sdv:SDY_3776      |
| SBO_0104_s_at      | -2.267983949 | 0.013189412 | Decrease_in_adherent aceF; dihydrolipoamide acetyltransferase ; K00627 pyruvate dehydrogenase E2 component (dihydrolipoamide acetyltransferase) [EC:2.3.1.12]                                                         | sbv:SBBS512_E0987 |
| V5833_s_at         | -2.267441021 | 0.006541497 | Decrease_in_adherent hslV; ATP-dependent protease peptidase subunit ; K01419 ATP-dependent HslUV protease, peptidase subunit HslV [EC:3.4.25.-]                                                                       | sdv:SDY_3805      |
| V5769_s_at         | -2.267077402 | 0.008721154 | Decrease_in_adherent psv; phosphoenolpyruvate carboxylase (EC:4.1.1.31); K01595 phosphoenolpyruvate carboxylase [EC:4.1.1.31]                                                                                         | sdv:SDY_3791      |
| A4713_s_at         | -2.264228914 | 0.037879967 | Decrease_in_adherent yecG; universal stress protein UspC                                                                                                                                                              | sbv:SBBS512_E0987 |
| SB5_4462_at        | -2.263758166 | 0.025388053 | Decrease_in_adherent NO_KEGG_DATA                                                                                                                                                                                     | NO_KEGG_DATA      |
| A1592_s_at         | -2.262458072 | 0.002381101 | Decrease_in_adherent transcriptional regulator MalT; K03556 LuxR family transcriptional regulator, maltose regulon positive regulatory protein                                                                        | ect:EC0295        |
| V0314_s_at         | -2.262123673 | 0.003878772 | Decrease_in_adherent pgi; glucose-6-phosphate isomerase (EC:5.3.1.9); K01810 glucose-6-phosphate isomerase [EC:5.3.1.9]                                                                                               | sdv:SDY_4226      |
| V6990_s_at         | -2.25855193  | 0.025887116 | Decrease_in_adherent tar; methyl-accepting chemotaxis protein II ; K05875 methyl-accepting chemotaxis protein II, aspartate sensor receptor                                                                           | ssn:SSON_1231     |
| A2739_s_at         | -2.253983143 | 0.000703878 | Decrease_in_adherent hypothetical protein                                                                                                                                                                             | sbv:SBBS512_E0987 |
| c5607_at           | -2.25246795  | 0.000803258 | Decrease_in_adherent NO_KEGG_DATA                                                                                                                                                                                     | NO_KEGG_DATA      |
| V4234_s_at         | -2.247664589 | 0.01434001  | Decrease_in_adherent kgtP; alpha-ketoglutarate transporter ; K03761 MFS transporter, MHS family, alpha-ketoglutarate permease                                                                                         | sdv:SDY_2830      |
| b1603_s_at         | -2.245963717 | 0.002833183 | Decrease_in_adherent pntA; NAD(P) transhydrogenase subunit alpha (EC:1.6.1.2); K00324 NAD(P) transhydrogenase subunit alpha [EC:1.6.1.2]                                                                              | ect:EC027         |
| A0626_s_at         | -2.24531629  | 0.005130379 | Decrease_in_adherent NO_KEGG_DATA                                                                                                                                                                                     | NO_KEGG_DATA      |
| EC869_8287_x_at    | -2.243951488 | 0.001438273 | Decrease_in_adherent yfeK; hypothetical protein                                                                                                                                                                       | sbv:SBBS512_E0654 |
| A3372_s_at         | -2.242364871 | 0.00771712  | Decrease_in_adherent cydA; cytochrome d ubiquinol oxidase, subunit I (EC:1.10.3.-); K00425 cytochrome bd-I oxidase subunit I [EC:1.10.3.-]                                                                            | ect:EC011_2259    |
| A4557_s_at         | -2.23995664  | 0.001787585 | Decrease_in_adherent ascC; succinylornithine transaminase AscC, PLP-dependent; K00840 succinylornithine aminotransferase [EC:2.6.1.81]                                                                                | etw:ECSP_0113     |
| ECs0116_s_at       | -2.237163275 | 0.008675374 | Decrease_in_adherent aroP; aromatic amino acid transporter; K11734 aromatic amino acid transport protein AroP                                                                                                         | ssn:SSON_1445     |
| A4519_s_at         | -2.236788538 | 0.000174994 | Decrease_in_adherent pheT; phenylalanyl-tRNA synthetase subunit beta (EC:6.1.1.20); K01890 phenylalanyl-tRNA synthetase beta chain [EC:6.1.1.20]                                                                      | sbv:SBBS512_E0987 |
| SB5_4552_s_at      | -2.235855946 | 0.009488944 | Decrease_in_adherent shikimate transporter ; K08172 MFS transporter, MHS family, shikimate and dehydroshikimate transport protein                                                                                     | sdv:SDY_4050      |
| EC869_4486_s_at    | -2.234594068 | 0.00043652  | Decrease_in_adherent kbl; 2-amino-3-ketobutyrate coenzyme A ligase (EC:2.3.1.29); K00639 glycine C-acetyltransferase [EC:2.3.1.29]                                                                                    | sdv:SDY_1674      |
| V3343_s_at         | -2.234207402 | 0.009935076 | Decrease_in_adherent hypothetical protein                                                                                                                                                                             | etw:ECSP_0727     |
| EC869_7445_s_at    | -2.23419518  | 0.010154365 | Decrease_in_adherent glnS; glutamyl-tRNA synthetase; K01886 glutamyl-tRNA synthetase [EC:6.1.1.18]                                                                                                                    | sbv:SBBS512_E3479 |
| A1232_s_at         | -2.230872347 | 0.009612505 | Decrease_in_adherent hypothetical protein ; K09806 hypothetical protein                                                                                                                                               | cko:CKO_02010     |
| A3772_s_at         | -2.224044342 | 0.046278932 | Decrease_in_adherent hypothetical protein                                                                                                                                                                             | sdv:SDY_0175      |
| A2807_s_at         | -2.220303086 | 0.013692084 | Decrease_in_adherent pfs; 5-methylthioadenosine/S-adenosylhomocysteine nucleosidase (EC:3.2.2.9); K01243 S-adenosylhomocysteine/5-methylthioadenosine nucleosidase [EC:3.2.2.9]                                       | ebr:ECB_03475     |
| H3672_s_at         | -2.218674828 | 0.004339211 | Decrease_in_adherent kbi; 2-amino-3-ketobutyrate coenzyme A ligase (EC:2.3.1.29); K00639 glycine C-acetyltransferase [EC:2.3.1.29]                                                                                    | bsu:BSU27910      |
| AFFX-r2-Bs-phe-5_a | -2.214337778 | 1.88E-06    | Decrease_in_adherent pheB; hypothetical protein; K06209 chorismate mutase [EC:5.4.99.5]                                                                                                                               | ssn:MS1295        |
| V4112_s_at         | -2.212304276 | 0.048397158 | Decrease_in_adherent glyA; serine hydroxymethyltransferase (EC:2.1.2.1); K00600 glycine hydroxymethyltransferase [EC:2.1.2.1]                                                                                         | sbv:SBBS512_E4486 |
| c3026_s_at         | -2.211433087 | 0.005700834 | Decrease_in_adherent guaA; GMP synthase (EC:6.3.5.2); K01951 GMP synthase (glutamine-hydrolysing) [EC:6.3.5.2]                                                                                                        | ssn:SSON_2589     |
| F4472_s_at         | -2.211426547 | 0.027690676 | Decrease_in_adherent rsd; anti-RNA polymerase sigma 70 factor ; K07740 regulator of sigma D                                                                                                                           | sbv:SBBS512_E3780 |
| K1746_s_at         | -2.209411247 | 0.000541676 | Decrease_in_adherent hypothetical protein                                                                                                                                                                             | ecc:c0640         |
| F0588_s_at         | -2.205606006 | 0.000352087 | Decrease_in_adherent hypothetical protein                                                                                                                                                                             | ecw:EC24377A_2330 |
| A0074_x_at         | -2.203332052 | 0.001488634 | Decrease_in_adherent rfbA1; glucose-1-phosphate thymidyltransferase (EC:2.7.7.24); K00973 glucose-1-phosphate thymidyltransferase [EC:2.7.7.24]                                                                       | NO_KEGG_DATA      |
| V1009_s_at         | -2.202471319 | 0.004993735 | Decrease_in_adherent NO_KEGG_DATA                                                                                                                                                                                     | sdv:SDY_0957      |
| SD1_1646_s_at      | -2.202427162 | 0.000986848 | Decrease_in_adherent yocC; cryptic autophosphorylating protein tyrosine kinase EtK ; K00903 protein-tyrosine kinase [EC:2.7.10.-]                                                                                     | sdv:SDY_0665      |
| A3365_s_at         | -2.202326204 | 0.019408085 | Decrease_in_adherent sucB; dihydrolipoamide succinyltransferase (EC:2.3.1.61); K00658 2-oxoglutarate dehydrogenase E2 component (dihydrolipoamide succinyltransferase) [EC:2.3.1.61]                                  | sbv:SBBS512_E3752 |
| b3375_s_at         | -2.201620896 | 0.001117919 | Decrease_in_adherent friR; DNA-binding transcriptional regulator FriR ; K10711 GntR family transcriptional regulator, friABCD operon transcriptional regulator                                                        | sdv:SDY_1343      |
| A4059_s_at         | -2.200979309 | 0.024696877 | Decrease_in_adherent yciN; hypothetical protein                                                                                                                                                                       | sdv:SDY_4049      |
| c4443_s_at         | -2.198371816 | 0.01023511  | Decrease_in_adherent tdh; L-threonine 3-dehydrogenase (EC:1.1.1.103); K00060 threonine 3-dehydrogenase [EC:1.1.1.103]                                                                                                 | sdv:SDY_4263      |
| A2468_s_at         | -2.195961245 | 0.026486753 | Decrease_in_adherent pyrI; aspartate carbamoyltransferase regulatory subunit (EC:2.1.3.2); K00610 aspartate carbamoyltransferase regulatory subunit                                                                   | ssn:SSON_1385     |
| ECs2487_s_at       | -2.194261737 | 0.019661169 | Decrease_in_adherent yeaA; methionine sulfoxide reductase B (EC:1.8.4.11); K07305 peptide-methionine (R)-S-oxide reductase [EC:1.8.4.12]                                                                              | NO_KEGG_DATA      |
| c1317_at           | -2.187786551 | 0.040867901 | Decrease_in_adherent NO_KEGG_DATA                                                                                                                                                                                     | ecw:EC24377A_0981 |
| A3579_s_at         | -2.185602224 | 0.002107252 | Decrease_in_adherent phage integrase family site specific recombinase                                                                                                                                                 | ssn:SSON_1305     |
| F2040_s_at         | -2.183616381 | 0.005222892 | Decrease_in_adherent hypothetical protein                                                                                                                                                                             | bsu:BSU2250       |
| AFFX-r2-Bs-thr-5_s | -2.183326989 | 5.76E-07    | Decrease_in_adherent thrC; threonine synthase (EC:4.2.3.1); K01733 threonine synthase [EC:4.2.3.1]                                                                                                                    | ecw:EC24377A_1707 |
| A4299_at           | -2.178407872 | 0.016463377 | Decrease_in_adherent hypothetical protein                                                                                                                                                                             | sbv:SBBS512_E0985 |
| A0011_s_at         | -2.17833082  | 0.000284958 | Decrease_in_adherent hypothetical protein                                                                                                                                                                             | sdv:SDY_2476      |
| EC869_0940_s_at    | -2.175803917 | 0.001502869 | Decrease_in_adherent nuoJ; NADH dehydrogenase subunit J (EC:1.6.5.3); K00339 NADH dehydrogenase I subunit J [EC:1.6.5.3]                                                                                              | sdv:SDY_0141      |
| A2755_s_at         | -2.172792566 | 1.30E-05    | Decrease_in_adherent ampE; regulatory protein AmpE ; K03807 AmpE protein                                                                                                                                              | ebr:ECB_02319     |
| H2460_x_at         | -2.170589279 | 0.010716214 | Decrease_in_adherent yfeK; hypothetical protein                                                                                                                                                                       | ect:ECIAI39_2181  |
| H1026_s_at         | -2.169712535 | 0.001781355 | Decrease_in_adherent hypothetical protein                                                                                                                                                                             | sdv:SDY_1288      |
| A3975_s_at         | -2.167869848 | 0.007478185 | Decrease_in_adherent galU; UTP--glucose-1-phosphate uridylyltransferase subunit GalU ; K00963 UTP--glucose-1-phosphate uridylyltransferase [EC:2.7.7.9]                                                               | sdv:SDY_2049      |
| A3817_s_at         | -2.166264681 | 0.006454934 | Decrease_in_adherent ptsG; glucose-specific PTS system IIC components ; K02778 PTS system, glucose-specific IIB component [EC:2.7.1.69]; K02779 PTS system, glucose-specific IIC component [EC:2.7.1.69]              | efl:LF82_p210     |
| ECP_1297_s_at      | -2.162691308 | 0.038248535 | Decrease_in_adherent hypothetical protein YciY                                                                                                                                                                        | ebr:ECB_03926     |
| b4054_s_at         | -2.158303067 | 0.000527716 | Decrease_in_adherent tyrB; tyrosine aminotransferase, tyrosine-repressible, PLP-dependent (EC:2.6.1.57); K00832 aromatic-amino-acid transaminase [EC:2.6.1.57]                                                        | sdv:SDY_0567      |
| A3285_s_at         | -2.15729387  | 0.033019818 | Decrease_in_adherent ybeL; hypothetical protein                                                                                                                                                                       | sbv:SBBS512_E3723 |
| A1518_s_at         | -2.155504077 | 0.000285119 | Decrease_in_adherent slyD; FKBP-type peptidyl-prolyl cis-trans isomerase (EC:5.2.1.8); K03775 FKBP-type peptidyl-prolyl cis-trans isomerase SlyD [EC:5.2.1.8]                                                         | bsu:BSU2250       |
| AFFX-ThrX-M_at     | -2.155223181 | 0.000129375 | Decrease_in_adherent thrC; threonine synthase (EC:4.2.3.1); K01733 threonine synthase [EC:4.2.3.1]                                                                                                                    |                   |



|                    |              |             |                                                                                                                                                                                    |                    |
|--------------------|--------------|-------------|------------------------------------------------------------------------------------------------------------------------------------------------------------------------------------|--------------------|
| A2623_s_at         | -2.154049828 | 0.022062724 | Decrease_in_adherent deoA; thymidine phosphorylase (EC:2.4.2.4); K00758 thymidine phosphorylase [EC:2.4.2.4]                                                                       | sdv:SDY_4642       |
| EC869_3291_s_at    | -2.151826174 | 0.000937614 | Decrease_in_adherent NO_KEGG_DATA                                                                                                                                                  | NO_KEGG_DATA       |
| A0656_at           | -2.151575098 | 0.000300598 | Decrease_in_adherent hypothetical protein                                                                                                                                          | ecw:EcE24377A_2912 |
| A1480_s_at         | -2.149568354 | 0.005114298 | Decrease_in_adherent DNA-directed RNA polymerase subunit alpha ; K03040 DNA-directed RNA polymerase subunit alpha [EC:2.7.7.6]                                                     | cko:CKO_04708      |
| A1089_at           | -2.141349484 | 0.012476879 | Decrease_in_adherent hypothetical protein                                                                                                                                          | ecw:EcE24377A_3363 |
| ECs2809_s_at       | -2.13848414  | 0.004737465 | Decrease_in_adherent hypothetical protein ; K09802 hypothetical protein                                                                                                            | sb:SBBS512_E1230   |
| A3862_at           | -2.137449892 | 0.01970285  | Decrease_in_adherent hypothetical protein                                                                                                                                          | ecw:EcE24377A_1265 |
| S55_1846_x_at      | -2.135027298 | 0.022496323 | Decrease_in_adherent sbcB; exonuclease I (EC:3.1.11.1); K01141 exodeoxyribonuclease I [EC:3.1.11.1]                                                                                | sdv:SDY_2231       |
| b4406_s_at         | -2.133654593 | 0.009944194 | Decrease_in_adherent yaeP; hypothetical protein                                                                                                                                    | sdv:SDY_0208       |
| A3853_s_at         | -2.130534296 | 0.019082469 | Decrease_in_adherent hypothetical protein                                                                                                                                          | ef:ECH74115_2279   |
| A1499_s_at         | -2.129979925 | 0.008702559 | Decrease_in_adherent hypothetical protein                                                                                                                                          | sec:SC3369         |
| b2908_s_at         | -2.128737379 | 0.028529899 | Decrease_in_adherent pepP; proline aminopeptidase P II ; K01262 X-Pro aminopeptidase [EC:3.4.11.9]                                                                                 | sdv:SDY_3173       |
| V6077_s_at         | -2.127674134 | 0.036973646 | Decrease_in_adherent ddl; D-alanyl-alanine synthetase A (EC:6.3.2.4); K01921 D-alanine-D-alanine ligase [EC:6.3.2.4]                                                               | sb:SBBS512_E0298   |
| A4533_s_at         | -2.127488793 | 0.027534785 | Decrease_in_adherent hypothetical protein                                                                                                                                          | sdv:SDY_1817       |
| A1805_s_at         | -2.126915507 | 0.000178381 | Decrease_in_adherent grxC; glutaredoxin 3 ; K03676 glutaredoxin 3                                                                                                                  | sdv:SDY_4043       |
| A2197_s_at         | -2.12369759  | 0.005680133 | Decrease_in_adherent hypothetical protein                                                                                                                                          | ecw:EcE24377A_4526 |
| A1500_s_at         | -2.123683909 | 0.003549665 | Decrease_in_adherent rpsS; 30S ribosomal protein S19 ; K02965 small subunit ribosomal protein S19                                                                                  | cko:CKO_04732      |
| A3414_s_at         | -2.120024057 | 0.000183551 | Decrease_in_adherent regulatory protein C1 from bacteriophage origin                                                                                                               | eum:ECUMN_0588     |
| SD1_3571_s_at      | -2.11781967  | 0.015732883 | Decrease_in_adherent yaeO; Rho-binding antiterminaltor                                                                                                                             | sdv:SDY_0207       |
| EC869_5211_s_at    | -2.114917747 | 0.013664451 | Decrease_in_adherent hypothetical protein                                                                                                                                          | sbo:SBO_0084       |
| D4749_s_at         | -2.109359754 | 0.033652715 | Decrease_in_adherent relaxosome component                                                                                                                                          | seh:SeHA_A0073     |
| SD1_0741_s_at      | -2.107879507 | 0.00162837  | Decrease_in_adherent ribosomal protein S1 ; K02945 small subunit ribosomal protein S1                                                                                              | dze:Di1591_2339    |
| b0839_s_at         | -2.105315951 | 0.028184071 | Decrease_in_adherent dacC; D-alanyl-D-alanine carboxypeptidase fraction C (EC:3.4.16.4); K07258 D-alanyl-D-alanine carboxypeptidase (penicillin-binding protein 5/6) [EC:3.4.16.4] | sb:SBBS512_E2506   |
| V6499_s_at         | -2.103603656 | 0.000106271 | Decrease_in_adherent fabI; enoyl-(acyl carrier protein) reductase (EC:1.3.1.10); K00208 enoyl-[acyl-carrier protein] reductase I [EC:1.3.1.9]                                      | sdv:SDY_1368       |
| V4232_s_at         | -2.102790087 | 0.045794204 | Decrease_in_adherent kgtP; alpha-ketoglutarate transporter ; K03761 MFS transporter, MHS family, alpha-ketoglutarate permease                                                      | sdv:SDY_2830       |
| A0621_s_at         | -2.102509784 | 0.021073797 | Decrease_in_adherent clpB; protein disaggregation chaperone ; K03695 ATP-dependent Clp protease ATP-binding subunit ClpB                                                           | sb:SBBS512_E2973   |
| AFFX-r2-Bs-thr-M_s | -2.099396963 | 7.92E-05    | Decrease_in_adherent thrC; threonine synthase (EC:4.2.3.1); K01733 threonine synthase [EC:4.2.3.1]                                                                                 | bsu:BSU32250       |
| V3344_s_at         | -2.098621838 | 0.01803193  | Decrease_in_adherent ydiJ; putative oxidase ; K06911                                                                                                                               | sdv:SDY_1675       |
| c2650_at           | -2.096996049 | 0.006335032 | Decrease_in_adherent NO_KEGG_DATA                                                                                                                                                  | NO_KEGG_DATA       |
| H2063_s_at         | -2.096082576 | 0.006061959 | Decrease_in_adherent putative Aida-I adhesin-like protein                                                                                                                          | eqj:ECO26_3415     |
| V3698_x_at         | -2.092646925 | 0.037150796 | Decrease_in_adherent cri; DNA-binding transcriptional regulator Cri ; K11926 sigma factor-binding protein Cri                                                                      | sdv:SDY_0477       |
| b2741_s_at         | -2.08470163  | 0.002808824 | Decrease_in_adherent hypothetical protein                                                                                                                                          | eci:UT189_C3110    |
| A3783_s_at         | -2.084482021 | 6.82E-05    | Decrease_in_adherent rimJ; ribosomal-protein-S5-alanine N-acetyltransferase ; K03790 ribosomal-protein-alanine N-acetyltransferase [EC:2.3.1.128]                                  | sdv:SDY_2086       |
| A2271_s_at         | -2.080377605 | 0.015563231 | Decrease_in_adherent yjgQ; hypothetical protein                                                                                                                                    | ssn:SSON_4236      |
| V6896_s_at         | -2.076536176 | 0.000545595 | Decrease_in_adherent pnuC; required for MNM transport ; K03811 nicotinamide mononucleotide transporter                                                                             | sdv:SDY_0695       |
| A1987_s_at         | -2.07616387  | 0.020910632 | Decrease_in_adherent rffG; dTDP-glucose 4,6-dehydratase RffG; K01710 dTDP-glucose 4,6-dehydratase [EC:4.2.1.46]                                                                    | eqj:ECO26_4798     |
| A3266_s_at         | -2.073711758 | 7.14E-07    | Decrease_in_adherent tatE; twin arginine translocase protein E ; K03425 sec-independent protein translocase protein TatE                                                           | sdv:SDY_0549       |
| AFFX-ThrX_5_at     | -2.070667476 | 7.94E-06    | Decrease_in_adherent thrC; threonine synthase (EC:4.2.3.1); K01733 threonine synthase [EC:4.2.3.1]                                                                                 | bsu:BSU32250       |
| A0485_s_at         | -2.070490263 | 2.48E-05    | Decrease_in_adherent yfjB; hypothetical protein                                                                                                                                    | sdv:SDY_2655       |
| A3809_s_at         | -2.066778427 | 0.00026515  | Decrease_in_adherent fabG; 3-ketoacyl-(acyl-carrier-protein) reductase (EC:1.1.1.100); K00059 3-oxoacyl-[acyl-carrier protein] reductase [EC:1.1.1.100]                            | sb:SBBS512_E2231   |
| EC536_5493_s_at    | -2.064940809 | 0.004510456 | Decrease_in_adherent hypothetical protein                                                                                                                                          | eci:UT189_C0464    |
| EC869_2599_s_at    | -2.064890904 | 0.008002202 | Decrease_in_adherent tra; methyl-accepting chemotaxis protein II; K05875 methyl-accepting chemotaxis protein II, aspartate sensor receptor                                         | ent:ECSP_2460      |
| A3430_s_at         | -2.062346661 | 0.036035897 | Decrease_in_adherent NO_KEGG_DATA                                                                                                                                                  | NO_KEGG_DATA       |
| b2796_s_at         | -2.058964961 | 0.000333136 | Decrease_in_adherent hypothetical protein                                                                                                                                          | ec:3363            |
| b0435_s_at         | -2.057625501 | 0.04138362  | Decrease_in_adherent bolA; transcriptional regulator BolA ; K05527 BolA protein                                                                                                    | sdv:SDY_0298       |
| V3521_s_at         | -2.055571762 | 0.000468228 | Decrease_in_adherent transketolase (EC:2.2.1.1); K00615 transketolase [EC:2.2.1.1]                                                                                                 | ent:Ent638_2960    |
| A0009_s_at         | -2.054393989 | 0.027906134 | Decrease_in_adherent amn; AMP nucleosidase ; K01241 AMP nucleosidase [EC:3.2.2.4]                                                                                                  | elf:LF82_0084      |
| F3392_s_at         | -2.053672877 | 0.015393013 | Decrease_in_adherent mdaB; modulator of drug activity B ; K03923 modulator of drug activity B                                                                                      | sb:SBBS512_E3461   |
| V5378_s_at         | -2.051904395 | 0.002473194 | Decrease_in_adherent putative dehydrogenase                                                                                                                                        | cko:CKO_04859      |
| V4816_s_at         | -2.048948792 | 0.011061704 | Decrease_in_adherent yieE; hypothetical protein                                                                                                                                    | sdv:SDY_4201       |
| V5011_s_at         | -2.047845722 | 0.02814671  | Decrease_in_adherent lld; L-lactate dehydrogenase (EC:1.1.2.3); K00101 L-lactate dehydrogenase (cytochrome) [EC:1.1.2.3]                                                           | sdv:SDY_4038       |
| A2172_at           | -2.047508062 | 8.38E-05    | Decrease_in_adherent NO_KEGG_DATA                                                                                                                                                  | NO_KEGG_DATA       |
| A0072_at           | -2.045977041 | 0.03603949  | Decrease_in_adherent glycosyl transferase group 2 family protein (EC:2.4.1.-)                                                                                                      | ecw:EcE24377A_2328 |
| b4142_s_at         | -2.045542076 | 0.000971534 | Decrease_in_adherent hypothetical protein                                                                                                                                          | ecc:c5225          |
| SDY_0383_s_at      | -2.042982338 | 0.002584217 | Decrease_in_adherent cof; hypothetical protein ; K11938 HMP-PP phosphatase [EC:3.6.1.-]                                                                                            | sdv:SDY_0383       |
| D4444_s_at         | -2.041093128 | 0.007545752 | Decrease_in_adherent rpsD; 30S ribosomal protein S4 ; K02986 small subunit ribosomal protein S4                                                                                    | cko:CKO_04709      |
| EC869_8298_x_at    | -2.040160897 | 0.022752044 | Decrease_in_adherent cysK; cysteine synthase A ; K01738 cysteine synthase A [EC:2.5.1.47]                                                                                          | sdv:SDY_2611       |
| F0652_s_at         | -2.040079562 | 0.003895205 | Decrease_in_adherent cstA2; carbon starvation protein, predicted membrane protein; K06200 carbon starvation protein                                                                | etr:ETAE_2509      |
| K2158_s_at         | -2.039166185 | 0.025522889 | Decrease_in_adherent 6-phosphofructokinase 2 ; K00850 6-phosphofructokinase [EC:2.7.1.11]                                                                                          | ecy:ECSE_1892      |
| EC869_8425_s_at    | -2.035046542 | 2.10E-05    | Decrease_in_adherent pheT; phenylalanyl-tRNA synthetase subunit beta ; K01890 phenylalanyl-tRNA synthetase beta chain [EC:6.1.1.20]                                                | cko:CKO_01740      |
| V4193_s_at         | -2.032085095 | 0.025847278 | Decrease_in_adherent DNA-binding transcriptional activator CafF ; K08277 transcriptional activator CafF                                                                            | cko:CKO_03349      |
| SD1_0310_s_at      | -2.029133085 | 0.002674329 | Decrease_in_adherent gadA; glutamate decarboxylase isozyme                                                                                                                         | sdv:SDY_3532       |
| G1262_s_at         | -2.026505241 | 0.009101596 | Decrease_in_adherent trg; methyl-accepting chemotaxis protein III ; K05876 methyl-accepting chemotaxis protein III, ribose and galactose sensor receptor                           | ssn:SSON_1721      |
| b0605_s_at         | -2.024422848 | 0.047331742 | Decrease_in_adherent ahpC; alkyl hydroperoxide reductase subunit C (EC:1.11.1.15); K03386 peroxiredoxin (alkyl hydroperoxide reductase subunit C) [EC:1.11.1.15]                   | sb:SBBS512_E0519   |
| EC869_5106_s_at    | -2.023006516 | 0.034098979 | Decrease_in_adherent NO_KEGG_DATA                                                                                                                                                  | NO_KEGG_DATA       |
| b3936_s_at         | -2.02254373  | 0.00994075  | Decrease_in_adherent rpmE; 50S ribosomal protein L31 ; K02909 large subunit ribosomal protein L31                                                                                  | sdv:SDY_3801       |
| A4157_s_at         | -2.020377131 | 0.002804573 | Decrease_in_adherent NO_KEGG_DATA                                                                                                                                                  | NO_KEGG_DATA       |
| EC869_4082_s_at    | -2.01802406  | 0.003345904 | Decrease_in_adherent ompF; outer membrane protein F ; K09476 outer membrane pore protein F                                                                                         | sdv:SDY_2328       |
| EC536_4168_s_at    | -2.01666082  | 0.009930436 | Decrease_in_adherent pdxH; pyridoxine 5'-phosphate oxidase; K00275 pyridoxamine 5'-phosphate oxidase [EC:1.4.3.5]                                                                  | etw:ECSP_2203      |
| V0844_s_at         | -2.016343123 | 0.041957317 | Decrease_in_adherent hfq; RNA-binding protein Hfq ; K03666 host factor-I protein                                                                                                   | sbo:SBO_4284       |
| V3467_s_at         | -2.015679846 | 0.001459825 | Decrease_in_adherent hypothetical protein ; K07223 putative iron-dependent peroxidase                                                                                              | sdv:SDY_2629       |
| V6065_s_at         | -2.013413115 | 0.039234333 | Decrease_in_adherent proC; pyrroline-5-carboxylate reductase (EC:1.5.1.2); K00286 pyrroline-5-carboxylate reductase [EC:1.5.1.2]                                                   | sdv:SDY_0356       |
| EC869_1986_s_at    | -2.012180045 | 0.02552691  | Decrease_in_adherent yciB; intracellular septation protein A ; K06190 intracellular septation protein                                                                              | sdv:SDY_1318       |
| SD1_1093_s_at      | -2.009059628 | 0.013477225 | Decrease_in_adherent putative oxidoreductase                                                                                                                                       | sbo:SBO_1510       |

|                    |              |             |                                                                                                                                                                                           |                     |
|--------------------|--------------|-------------|-------------------------------------------------------------------------------------------------------------------------------------------------------------------------------------------|---------------------|
| A3557_s_at         | -2.008494928 | 0.045615357 | Decrease_in_adherent cIpS; ATP-dependent Clp protease adaptor protein ClpS ; K06891 ATP-dependent Clp protease adaptor protein ClpS                                                       | sdv:SDY_2380        |
| A3042_s_at         | -2.001414886 | 0.012312459 | Decrease_in_adherent hypothetical protein ; K09913 hypothetical protein                                                                                                                   | sbv:SbBS512_E0308   |
| A0057_s_at         | -2.001290312 | 8.59E-05    | Decrease_in_adherent hisB; imidazoleglycerol-phosphate dehydratase/histidinol-phosphate phosphatase ; K10189 imidazoleglycerol-phosphate dehydratase / histidinol-phosphate [EC:4.2.1.]   | kpu:KP1_3683        |
| V5495_s_at         | -1.996439247 | 0.005867051 | Decrease_in_adherent NO_KEGG_DATA                                                                                                                                                         | NO_KEGG_DATA        |
| S55_4421_s_at      | -1.995584186 | 0.022578387 | Decrease_in_adherent yfbT; putative phosphatase                                                                                                                                           | sdv:SDY_2489        |
| G0937_x_at         | -1.992818767 | 0.004863351 | Decrease_in_adherent rraB; uncharacterized protein YjgD ; K09893 hypothetical protein                                                                                                     | efl:LF82_1990       |
| EC869_7371_s_at    | -1.991932173 | 0.006207632 | Decrease_in_adherent NO_KEGG_DATA                                                                                                                                                         | NO_KEGG_DATA        |
| V4311_s_at         | -1.9907023   | 0.001461165 | Decrease_in_adherent NO_KEGG_DATA                                                                                                                                                         | NO_KEGG_DATA        |
| A3624_s_at         | -1.988149991 | 5.63E-05    | Decrease_in_adherent aspC; aromatic amino acid aminotransferase (EC:2.6.1.57); K00813 aspartate aminotransferase [EC:2.6.1.1]                                                             | sdv:SDY_2329        |
| S85_4324_s_at      | -1.985356028 | 0.011107679 | Decrease_in_adherent NO_KEGG_DATA                                                                                                                                                         | NO_KEGG_DATA        |
| A2849_s_at         | -1.983905339 | 0.032024625 | Decrease_in_adherent yaeD; D,D-heptose 1,7-bisphosphate phosphatase ; K03273 D-glycero-D-manno-heptose 1,7-bisphosphate phosphatase [EC:3.1.3.-]                                          | ssn:SSON_0214       |
| b3103_s_at         | -1.981849619 | 0.023907064 | Decrease_in_adherent putative inner membrane protein YnhH                                                                                                                                 | sbv:SbBS512_E3258   |
| S85_1453_s_at      | -1.978145379 | 0.036230097 | Decrease_in_adherent gadC; glutamate:gamma aminobutyrate antiporter                                                                                                                       | sbv:SbBS512_E1755   |
| APECO1_3321_at     | -1.978079246 | 0.039193975 | Decrease_in_adherent NO_KEGG_DATA                                                                                                                                                         | NO_KEGG_DATA        |
| V3693_s_at         | -1.977473123 | 0.014803446 | Decrease_in_adherent pepD; aminoacyl-histidine dipeptidase (peptidase D) (EC:3.4.13.3); K01270 aminoacylhistidine dipeptidase [EC:3.4.13.3]                                               | ebr:ECB_00232       |
| A0654_at           | -1.976647067 | 0.022558958 | Decrease_in_adherent putative type I restriction-modification system, S subunit ; K01154 type I restriction enzyme, S subunit [EC:3.1.21.3]                                               | ecw:EcE24377A_2910  |
| A1821_s_at         | -1.975326232 | 0.001505356 | Decrease_in_adherent rfaJ; lipopolysaccharide 1,2-glucosyltransferase (EC:2.4.1.58); K03276 UDP-glucose/galactose:(glucosyl)1,2-galactose-1,2-glucosyl/galactosyltransferase [EC:2.4.1.-] | sbv:SbBS512_E4053   |
| V5680_s_at         | -1.970294548 | 0.028738935 | Decrease_in_adherent glnP; glutamine ABC transporter permease protein ; K10037 glutamine transport system permease protein                                                                | sdv:SDY_0786        |
| A2627_s_at         | -1.965847786 | 0.01931171  | Decrease_in_adherent lplA; lipotein-protein ligase A (EC:6.3.2.-); K03800 lipotein-protein ligase A [EC:2.7.7.63]                                                                         | sbv:SbBS512_E4933   |
| V3697_s_at         | -1.962382641 | 0.036293373 | Decrease_in_adherent frsA; hydrolase FrsA; K11750 esterase FrsA [EC:3.1.-.1]                                                                                                              | eqj:EC026_0295      |
| A0363_at           | -1.961674563 | 0.042362249 | Decrease_in_adherent NO_KEGG_DATA                                                                                                                                                         | NO_KEGG_DATA        |
| V1944_x_at         | -1.959760289 | 0.023568047 | Decrease_in_adherent hypothetical protein                                                                                                                                                 | cko:CKO_04557       |
| A0633_s_at         | -1.958482082 | 0.000218122 | Decrease_in_adherent rplS; 50S ribosomal protein L19 ; K02884 large subunit ribosomal protein L19                                                                                         | sdv:SDY_2780        |
| A0833_s_at         | -1.955785687 | 0.02902406  | Decrease_in_adherent rplS; 50S ribosomal protein L19 ; K02884 large subunit ribosomal protein L19                                                                                         | cko:CKO_04145       |
| V3518_s_at         | -1.955113995 | 0.019637767 | Decrease_in_adherent talI; transaldolase A (EC:2.2.1.2); K00616 transaldolase [EC:2.2.1.2]                                                                                                | sbv:SbBS512_E2830   |
| A1822_s_at         | -1.951842666 | 0.000292741 | Decrease_in_adherent waaO; rfaI; UDP-glucose:(glucosyl) LPS alpha1,3-glucosyltransferase WaaO ; K03275 UDP-glucose:(glucosyl)LPS alpha-1,3-glucosyltransferase [EC:2.4.1.-]               | ebr:ECB_03486       |
| b4032_s_at         | -1.950742516 | 0.000150009 | Decrease_in_adherent malG; maltose transporter permease ; K10110 maltose/maltodextrin transport system permease protein                                                                   | ssn:SSON_4210       |
| A3916_s_at         | -1.946863375 | 0.000408906 | Decrease_in_adherent hypothetical protein                                                                                                                                                 | sbv:SbBS512_E1335   |
| A1431_s_at         | -1.946509014 | 0.022100536 | Decrease_in_adherent argR; arginine repressor ; K03402 transcriptional regulator of arginine metabolism                                                                                   | sdv:SDY_3413        |
| A3910_s_at         | -1.945077514 | 0.00105214  | Decrease_in_adherent minD; cell division inhibitor MinD ; K03609 septum site-determining protein MinD                                                                                     | sdv:SDY_1206        |
| SDY_4021_s_at      | -1.942344195 | 0.021870371 | Decrease_in_adherent hypothetical protein                                                                                                                                                 | sdv:SDY_PA07        |
| pCo0005_at         | -1.937586104 | 0.047926871 | Decrease_in_adherent hypothetical protein                                                                                                                                                 | ecw:EcE24377A_D0041 |
| c2804_s_at         | -1.936646276 | 0.000664102 | Decrease_in_adherent menC; O-succinylbenzoate synthase (EC:4.2.1.-); K02549 O-succinylbenzoate synthase [EC:4.2.1.113]                                                                    | sbv:SbBS512_E2640   |
| A2738_s_at         | -1.933650327 | 0.011285171 | Decrease_in_adherent ftsA; cell division protein FtsA ; K03590 cell division protein FtsA                                                                                                 | cko:CKO_03281       |
| A0365_s_at         | -1.933308548 | 0.01455889  | Decrease_in_adherent hypothetical protein                                                                                                                                                 | sdv:SDY_2524        |
| V5387_s_at         | -1.930551822 | 0.002404904 | Decrease_in_adherent asd; aspartate-semialdehyde dehydrogenase (EC:1.2.1.11); K00133 aspartate-semialdehyde dehydrogenase [EC:1.2.1.11]                                                   | sdv:SDY_3579        |
| EC869_7476_s_at    | -1.929414078 | 0.034096228 | Decrease_in_adherent PhoH family protein                                                                                                                                                  | ddc:dds66_1152      |
| b2665_s_at         | -1.927631801 | 0.043486428 | Decrease_in_adherent ynfJ; LysM domain/BON superfamily protein                                                                                                                            | sdv:SDY_2855        |
| A2145_s_at         | -1.925369237 | 0.001179251 | Decrease_in_adherent hslU; ATP-dependent protease ATP-binding subunit HslU ; K03667 ATP-dependent HslUV protease ATP-binding subunit HslU                                                 | sbv:SbBS512_E4413   |
| V5396_s_at         | -1.922181035 | 0.036838781 | Decrease_in_adherent glgX; glycogen debranching enzyme ; K02438 glycogen operon protein GlgX [EC:3.2.1.-]                                                                                 | sdv:SDY_3577        |
| A1479_s_at         | -1.922146232 | 0.000451349 | Decrease_in_adherent rplQ; 50S ribosomal protein L17 ; K02879 large subunit ribosomal protein L17                                                                                         | sdv:SDY_3470        |
| A1631_s_at         | -1.922105764 | 0.000222431 | Decrease_in_adherent livM; leucine/isoleucine/valine transporter permease subunit ; K01998 branched-chain amino acid transport system permease protein                                    | sbv:SbBS512_E3866   |
| V1007_s_at         | -1.91995555  | 0.04051981  | Decrease_in_adherent purB; adenylosuccinate lyase (EC:4.3.2.2); K01756 adenylosuccinate lyase [EC:4.3.2.2]                                                                                | pmr:PM10886         |
| SD1_3331_s_at      | -1.919036107 | 0.039748589 | Decrease_in_adherent pflA; pyruvate formate lyase-activating enzyme 1 (EC:1.97.1.4); K04069 pyruvate formate lyase activating enzyme [EC:1.97.1.4]                                        | sdv:SDY_2359        |
| SD1_2172_s_at      | -1.917482096 | 0.000143045 | Decrease_in_adherent fabB; 3-oxoacyl-(acyl carrier protein) synthase I (EC:2.3.1.41); K00647 3-oxoacyl-(acyl-carrier-protein) synthase I [EC:2.3.1.41]                                    | sdv:SDY_2522        |
| A1478_s_at         | -1.915199246 | 0.045729676 | Decrease_in_adherent yhdN; hypothetical protein                                                                                                                                           | sdv:SDY_3469        |
| EC869_0563_s_at    | -1.912556131 | 0.003383062 | Decrease_in_adherent priC; oligopeptidase A ; K01414 oligopeptidase A [EC:3.4.24.70]                                                                                                      | sdv:SDY_3564        |
| A4455_s_at         | -1.91239256  | 0.042114763 | Decrease_in_adherent ydhD; hypothetical protein ; K07390 monothiol glutaredoxin                                                                                                           | sdv:SDY_1880        |
| EC869_7364_s_at    | -1.912328544 | 0.012298315 | Decrease_in_adherent cIpX; ATP-dependent protease ATP-binding subunit ClpX ; K03544 ATP-dependent Clp protease ATP-binding subunit ClpX                                                   | sdv:SDY_0294        |
| W4306_s_at         | -1.911141159 | 0.006366983 | Decrease_in_adherent hypothetical protein                                                                                                                                                 | sec:SC2696          |
| AFfX-DapX-5_at     | -1.909050309 | 3.54E-05    | Decrease_in_adherent dapB; dihydrodipicolinate reductase (EC:1.3.1.26); K00215 dihydrodipicolinate reductase [EC:1.3.1.26]                                                                | bsu:BSU22490        |
| EC869_3959_s_at    | -1.908037065 | 0.017980771 | Decrease_in_adherent putative phage repressor protein CI                                                                                                                                  | eqj:EC026_2664      |
| A2072_s_at         | -1.907275548 | 0.041770539 | Decrease_in_adherent NO_KEGG_DATA                                                                                                                                                         | NO_KEGG_DATA        |
| A3909_s_at         | -1.906213517 | 0.001516365 | Decrease_in_adherent minE; cell division topological specificity factor MinE ; K03608 cell division topological specificity factor                                                        | sdv:SDY_1205        |
| V0042_s_at         | -1.904843947 | 0.000246075 | Decrease_in_adherent efp; elongation factor P ; K02356 elongation factor EF-P                                                                                                             | sdv:SDY_4390        |
| SD1_1682_s_at      | -1.90265131  | 0.00157377  | Decrease_in_adherent apbA; 2-dehydropantoate 2-reductase (EC:1.1.1.169); K00077 2-dehydropantoate 2-reductase [EC:1.1.1.169]                                                              | sdv:SDY_0305        |
| A4101_s_at         | -1.902416403 | 0.004490277 | Decrease_in_adherent pspB; phage shock protein B ; K03970 phage shock protein B                                                                                                           | sdv:SDY_1939        |
| AFfX-DapX-3_at     | -1.901869767 | 9.08E-06    | Decrease_in_adherent ypfJ; hypothetical protein                                                                                                                                           | bsu:BSU22470        |
| b2905_s_at         | -1.89975366  | 0.027464489 | Decrease_in_adherent govT; glycine cleavage system aminomethyltransferase T (EC:2.1.2.10); K00605 aminomethyltransferase [EC:2.1.2.10]                                                    | sdv:SDY_3176        |
| SD1_0336_s_at      | -1.894335542 | 0.00017397  | Decrease_in_adherent priC; oligopeptidase A (EC:3.4.24.70); K01414 oligopeptidase A [EC:3.4.24.70]                                                                                        | sbv:SbBS512_E3824   |
| V4544_x_at         | -1.892977551 | 0.010030505 | Decrease_in_adherent argI; ornithine carbamoyltransferase subunit I (EC:2.1.3.3); K00611 ornithine carbamoyltransferase [EC:2.1.3.3]                                                      | sbo:SBO_4188        |
| A0951_s_at         | -1.890879541 | 0.013199604 | Decrease_in_adherent fIdB; flavodoxin FIdB ; K03840 flavodoxin II                                                                                                                         | sdv:SDY_3187        |
| F3193_s_at         | -1.890431726 | 0.040116213 | Decrease_in_adherent ygfB; hypothetical protein ; K09895 hypothetical protein                                                                                                             | sdv:SDY_3172        |
| A4769_s_at         | -1.888083714 | 0.018612167 | Decrease_in_adherent hypothetical protein                                                                                                                                                 | ecv:APECO1_991      |
| A4154_s_at         | -1.886639171 | 0.019529717 | Decrease_in_adherent idhA; D-lactate dehydrogenase (EC:1.1.1.28); K03778 D-lactate dehydrogenase [EC:1.1.1.28]                                                                            | sbv:SbBS512_E1618   |
| A2905_s_at         | -1.88471812  | 0.016452586 | Decrease_in_adherent pepD; aminoacyl-histidine dipeptidase ; K01270 aminoacylhistidine dipeptidase [EC:3.4.13.3]                                                                          | sdv:SDY_0480        |
| AFfX-r2-Bs-dap-3_a | -1.884404137 | 6.09E-06    | Decrease_in_adherent ypfJ; hypothetical protein                                                                                                                                           | bsu:BSU22470        |
| EC869_0457_s_at    | -1.883027235 | 0.007756656 | Decrease_in_adherent livK; high-affinity leucine-specific transport system; periplasmic binding protein ; K01999 branched-chain amino acid transport system substrate-binding protein     | sdv:SDY_3607        |
| V2537_s_at         | -1.882316822 | 0.017524654 | Decrease_in_adherent hdhA; 7-alpha-hydroxysteroid dehydrogenase (EC:1.1.1.159); K00076 7-alpha-hydroxysteroid dehydrogenase [EC:1.1.1.159]                                                | sdv:SDY_1838        |
| BF3598_s_at        | -1.878979192 | 0.002485018 | Decrease_in_adherent yhiV; putative transport system permease protein; K03296 hydrophobic/amphiphilic exporter-1 (mainly G- bacteria), HAE1 family                                        | svf:SCV_3986        |
| b0078_s_at         | -1.866630775 | 0.004830591 | Decrease_in_adherent livH; acetylactate synthase small subunit (EC:2.2.1.6); K01653 acetylactate synthase IIII small subunit [EC:2.2.1.6]                                                 | ebr:ECB_00080       |
| V3520_s_at         | -1.865872974 | 5.00E-05    | Decrease_in_adherent talI; transaldolase A (EC:2.2.1.2); K00616 transaldolase [EC:2.2.1.2]                                                                                                | sbv:SbBS512_E2830   |
| F3748_s_at         | -1.865654707 | 0.019888733 | Decrease_in_adherent NO_KEGG_DATA                                                                                                                                                         | NO_KEGG_DATA        |
| V6747_s_at         | -1.861998408 | 0.012007552 | Decrease_in_adherent tas; putative aldo-keto reductase                                                                                                                                    | sdv:SDY_3051        |

|                    |              |             |                                                                                                                                                                                          |                     |
|--------------------|--------------|-------------|------------------------------------------------------------------------------------------------------------------------------------------------------------------------------------------|---------------------|
| EC869_4322_s_at    | -1.860449969 | 0.03810349  | Decrease_in_adherent chromosome replication initiation inhibitor protein ; K05596 LysR family transcriptional regulator, chromosome initiation inhibitor                                 | cko:CKO_04281       |
| ECs1050_s_at       | -1.860091267 | 0.018833184 | Decrease_in_adherent hypothetical protein                                                                                                                                                | eci:UTI89_C1032     |
| V0296_s_at         | -1.860018925 | 0.006632577 | Decrease_in_adherent NO_KEGG_DATA                                                                                                                                                        | NO_KEGG_DATA        |
| AFFX-r2-Bs-dap-M_i | -1.858852322 | 0.000203468 | Decrease_in_adherent mgsA; methylglyoxal synthase (EC:4.2.3.3); K01734 methylglyoxal synthase [EC:4.2.3.3]                                                                               | bsu:BSU22480        |
| EC869_0354_s_at    | -1.858621149 | 0.007233325 | Decrease_in_adherent NO_KEGG_DATA                                                                                                                                                        | NO_KEGG_DATA        |
| F1227_s_at         | -1.856839944 | 0.047292118 | Decrease_in_adherent cupin family protein                                                                                                                                                | sb:SBBS512_E1306    |
| UTI89_C4861_x_at   | -1.852629098 | 0.003241474 | Decrease_in_adherent rraB; uncharacterized protein YjgD ; K09893 hypothetical protein                                                                                                    | elf:LF82_1990       |
| b2276_s_at         | -1.851322564 | 0.001976012 | Decrease_in_adherent nuoN; NADH dehydrogenase subunit N (EC:1.6.5.3); K00343 NADH dehydrogenase I subunit N [EC:1.6.5.3]                                                                 | sdv:SDY_2472        |
| A1433_s_at         | -1.851099154 | 0.024610425 | Decrease_in_adherent hypothetical protein ; K03623 ribonuclease inhibitor                                                                                                                | sb:SBBS512_E3537    |
| V6718_s_at         | -1.848806721 | 0.023691629 | Decrease_in_adherent fruR; DNA-binding transcriptional regulator FruR ; K03435 LacI family transcriptional regulator, fructose operon transcriptional repressor                          | sb:SBBS512_E0073    |
| AFFX-r2-Bs-dap-5_a | -1.847002518 | 1.35E-06    | Decrease_in_adherent dapB; dihydrodipicolinate reductase (EC:1.3.1.26); K00215 dihydrodipicolinate reductase [EC:1.3.1.26]                                                               | bsu:BSU22490        |
| SD1_2880_s_at      | -1.844764107 | 0.026230687 | Decrease_in_adherent NO_KEGG_DATA                                                                                                                                                        | NO_KEGG_DATA        |
| b4255_x_at         | -1.844351284 | 0.000965942 | Decrease_in_adherent yjgD; hypothetical protein ; K09893 hypothetical protein                                                                                                            | sdv:SDY_4277        |
| A1823_s_at         | -1.843508611 | 0.016897149 | Decrease_in_adherent waaP; putative LPS biosynthesis enzyme ; K02848 heptose (I) phosphotransferase [EC:2.7.1.-]                                                                         | sdv:SDY_4060        |
| A2625_s_at         | -1.843357263 | 0.023594162 | Decrease_in_adherent deoD; purine nucleoside phosphorylase (EC:2.4.2.1); K03784 purine-nucleoside phosphorylase [EC:2.4.2.1]                                                             | sdv:SDY_4644        |
| A2643_s_at         | -1.843067577 | 0.031379224 | Decrease_in_adherent two-component response regulator ; K07773 two-component system, OmpR family, aerobic respiration control protein ArcA                                               | cko:CKO_03387       |
| A3820_s_at         | -1.839974619 | 0.01916657  | Decrease_in_adherent hinT; similar to histidine triad-like protein ycf of escherichia coli ; K12150 HIT-like protein HinT                                                                | pay:PAU_01712       |
| A3606_s_at         | -1.839739658 | 0.002656523 | Decrease_in_adherent rpsA; 30S ribosomal protein S1 ; K02945 small subunit ribosomal protein S1                                                                                          | cko:CKO_02162       |
| AFFX-DapX-M_at     | -1.839397903 | 5.47E-05    | Decrease_in_adherent mgsA; methylglyoxal synthase (EC:4.2.3.3); K01734 methylglyoxal synthase [EC:4.2.3.3]                                                                               | bsu:BSU22480        |
| A2717_s_at         | -1.837776658 | 0.024663005 | Decrease_in_adherent leuC; isopropylmalate isomerase large subunit (EC:4.2.1.33); K01703 3-isopropylmalate/(R)-2-methylmalate dehydratase large subunit [EC:4.2.1.33]                    | sdv:SDY_0099        |
| EC869_0211_s_at    | -1.837713604 | 0.02823655  | Decrease_in_adherent fkpA; FKBP-type peptidyl-prolyl cis-trans isomerase ; K03772 FKBP-type peptidyl-prolyl cis-trans isomerase FkpA [EC:5.2.1.8]                                        | sbo:SB0_3327        |
| A1527_s_at         | -1.837333241 | 0.036284637 | Decrease_in_adherent crp; cAMP-regulatory protein ; K10914 CRP/FNR family transcriptional regulator, cyclic AMP receptor protein                                                         | ecw:EcE24377A_3827  |
| EC869_3856_s_at    | -1.836405122 | 0.005097565 | Decrease_in_adherent purH; bifunctional phosphoribosylaminoimidazolecarboxamide formyltransferase/IMP cyclohydrolase (EC:2.1.3.3.5.4.10); K00602 phosphoribosylaminoimidazolecarboxamide | sb:SBBS512_E4498    |
| S55_2236_x_at      | -1.83602427  | 0.026825191 | Decrease_in_adherent yfeK; hypothetical protein                                                                                                                                          | ssn:SSON_2509       |
| A1294_s_at         | -1.834585201 | 0.039892927 | Decrease_in_adherent yqjD; hypothetical protein                                                                                                                                          | sdv:SDY_3285        |
| S85_4325_s_at      | -1.827067918 | 0.006239764 | Decrease_in_adherent livI; acetolactate synthase 3 catalytic subunit [EC:2.2.1.6]; K01652 acetolactate synthase I/II/III large subunit [EC:2.2.1.6]                                      | sdv:SDY_0107        |
| V3848_s_at         | -1.826649855 | 0.012708125 | Decrease_in_adherent tolC; outer membrane channel protein ; K12340 outer membrane channel protein TolC                                                                                   | sdv:SDY_3205        |
| SDM_4222_s_at      | -1.826522773 | 2.56E-05    | Decrease_in_adherent hypothetical protein ; K07567 TdcF protein                                                                                                                          | sb:SBBS512_E3244    |
| A2272_s_at         | -1.826164479 | 0.000808723 | Decrease_in_adherent hypothetical protein                                                                                                                                                | cko:CKO_03844       |
| A2897_s_at         | -1.824709864 | 0.022326014 | Decrease_in_adherent putative HicB                                                                                                                                                       | ej:ECO26_0244       |
| V7071_s_at         | -1.818909612 | 8.23E-07    | Decrease_in_adherent NO_KEGG_DATA                                                                                                                                                        | NO_KEGG_DATA        |
| A2646_s_at         | -1.818038274 | 0.046441115 | Decrease_in_adherent thrB; homoserine kinase (EC:2.7.1.39); K00872 homoserine kinase [EC:2.7.1.39]                                                                                       | sdv:SDY_0003        |
| LH0125_s_at        | -1.817647433 | 0.019801941 | Decrease_in_adherent NO_KEGG_DATA                                                                                                                                                        | NO_KEGG_DATA        |
| EC869_2285_s_at    | -1.815869502 | 0.005010258 | Decrease_in_adherent NO_KEGG_DATA                                                                                                                                                        | NO_KEGG_DATA        |
| SD1_1220_s_at      | -1.815496239 | 0.009477433 | Decrease_in_adherent hypothetical protein                                                                                                                                                | sdv:SDY_2649        |
| SD1_3015_x_at      | -1.814786595 | 0.011276718 | Decrease_in_adherent yjgD; hypothetical protein ; K09893 hypothetical protein                                                                                                            | sdv:SDY_4277        |
| A1482_s_at         | -1.814195217 | 0.008967887 | Decrease_in_adherent rpsK; 30S ribosomal protein S11 ; K02948 small subunit ribosomal protein S11                                                                                        | sdv:SDY_3473        |
| V6469_s_at         | -1.811971157 | 0.00057232  | Decrease_in_adherent pspA; phage shock protein PspA ; K03969 phage shock protein A                                                                                                       | sdv:SDY_1940        |
| A4625_s_at         | -1.810994467 | 0.02401527  | Decrease_in_adherent NO_KEGG_DATA                                                                                                                                                        | NO_KEGG_DATA        |
| V6006_s_at         | -1.810469675 | 0.005846246 | Decrease_in_adherent tsx; nucleoside channel ; K05517 nucleoside-specific channel-forming protein                                                                                        | sdv:SDY_0323        |
| ECP_2591_s_at      | -1.810218149 | 0.039020178 | Decrease_in_adherent transposase                                                                                                                                                         | sb:SBBS512_E1228    |
| SF1462_s_at        | -1.807603698 | 0.005101874 | Decrease_in_adherent gdhA; glutamate dehydrogenase (EC:1.4.1.4); K00262 glutamate dehydrogenase (NADP+) [EC:1.4.1.4]                                                                     | sfl:SF1462          |
| A1048_at           | -1.804865649 | 0.036794241 | Decrease_in_adherent DNA methylase N-4/N-6 (EC:2.1.1.72)                                                                                                                                 | eck:EC55989_3268    |
| b0917_s_at         | -1.789359816 | 0.001626753 | Decrease_in_adherent ycaR; hypothetical protein ; K09791 hypothetical protein                                                                                                            | sdv:SDY_2341        |
| b2293_s_at         | -1.788549686 | 0.014129132 | Decrease_in_adherent yfbT; putative phosphatase                                                                                                                                          | sdv:SDY_2489        |
| V2687_s_at         | -1.78572374  | 0.006289373 | Decrease_in_adherent hybB; putative hydrogenase 2 b cytochrome subunit                                                                                                                   | sdv:SDY_3078        |
| b1215_s_at         | -1.78484718  | 0.043087595 | Decrease_in_adherent kdsA; 2-dehydro-3-deoxyphosphoacetate aldolase (EC:2.5.1.55); K01627 2-dehydro-3-deoxyphosphoacetate aldolase (KDO 8-P synthase) [EC:2.5.1.55]                      | sdv:SDY_1264        |
| A1971_s_at         | -1.783912917 | 6.77E-07    | Decrease_in_adherent ilvD; dihydroxy-acid dehydratase (EC:4.2.1.9); K01687 dihydroxy-acid dehydratase [EC:4.2.1.9]                                                                       | ssn:SSON_3942       |
| EC869_4308_x_at    | -1.777625416 | 0.00695166  | Decrease_in_adherent pepP; proline aminopeptidase P II (EC:3.4.11.9); K01262 X-Pro aminopeptidase [EC:3.4.11.9]                                                                          | sb:SBBS512_E3329    |
| EC869_8306_s_at    | -1.775930838 | 0.030196996 | Decrease_in_adherent ypeH; putative cytochrome oxidase                                                                                                                                   | sdv:SDY_2606        |
| ECs1680_s_at       | -1.771638273 | 0.000687796 | Decrease_in_adherent dsbB; disulfide bond formation protein B ; K03611 disulfide bond formation protein DsbB                                                                             | sdv:SDY_1222        |
| A3025_s_at         | -1.771232293 | 0.001295228 | Decrease_in_adherent hypothetical protein                                                                                                                                                | ecr:ECIAI1_0372     |
| c0999_s_at         | -1.770278701 | 0.014909924 | Decrease_in_adherent hypothetical protein                                                                                                                                                | sdv:SDY_2397        |
| A1262_s_at         | -1.769669401 | 0.002140515 | Decrease_in_adherent aer; aerotaxis sensor receptor, flavoprotein ; K03776 aerotaxis receptor                                                                                            | ssn:SSON_3210       |
| A4635_s_at         | -1.768343276 | 0.017860619 | Decrease_in_adherent NO_KEGG_DATA                                                                                                                                                        | NO_KEGG_DATA        |
| A4535_s_at         | -1.76713122  | 0.009917053 | Decrease_in_adherent hypothetical protein                                                                                                                                                | sdv:SDY_1819        |
| V6704_s_at         | -1.7652869   | 0.048103559 | Decrease_in_adherent NO_KEGG_DATA                                                                                                                                                        | NO_KEGG_DATA        |
| V3875_s_at         | -1.763956437 | 0.028567595 | Decrease_in_adherent sucC; succinyl-CoA synthetase subunit beta (EC:6.2.1.5); K01903 succinyl-CoA synthetase beta subunit [EC:6.2.1.5]                                                   | sdv:SDY_0666        |
| EC869_5206_s_at    | -1.762874037 | 0.01635129  | Decrease_in_adherent secA; azi, div; preprotein translocase subunit SecA ; K03070 preprotein translocase subunit SecA                                                                    | sdv:SDY_0128        |
| SF1693_s_at        | -1.762697595 | 0.003875127 | Decrease_in_adherent IS-10 transposase                                                                                                                                                   | aci:ACL_0003        |
| A2740_s_at         | -1.762436263 | 0.024992087 | Decrease_in_adherent lpxC; UDP-3-O-[3-hydroxymyristoyl] N-acetylglucosamine deacetylase ; K02535 UDP-3-O-[3-hydroxymyristoyl] N-acetylglucosamine deacetylase [EC:3.5.1.-]               | sdv:SDY_0126        |
| S55_4713_s_at      | -1.761466878 | 0.029817542 | Decrease_in_adherent tsr; methyl-accepting chemotaxis protein I ; K05874 methyl-accepting chemotaxis protein I, serine sensor receptor                                                   | sb:SBBS512_E4893    |
| b3186_s_at         | -1.757190613 | 0.014158069 | Decrease_in_adherent hypothetical protein                                                                                                                                                | ecw:EcE24377A_3672  |
| A1013_s_at         | -1.755370307 | 0.013608217 | Decrease_in_adherent metK; S-adenosylmethionine synthetase (EC:2.5.1.6); K00789 S-adenosylmethionine synthetase [EC:2.5.1.6]                                                             | sdv:SDY_3130        |
| A2146_s_at         | -1.755133796 | 0.011858478 | Decrease_in_adherent hslV; ATP-dependent protease peptidase subunit ; K01419 ATP-dependent HslUV protease, peptidase subunit HslV [EC:3.4.25.-]                                          | sdv:SDY_3805        |
| b1777_s_at         | -1.753706363 | 0.035395632 | Decrease_in_adherent yeaC; hypothetical protein ; K09916 hypothetical protein                                                                                                            | ebw:BWG_1590        |
| EC536_4973_s_at    | -1.750538223 | 0.007757055 | Decrease_in_adherent NO_KEGG_DATA                                                                                                                                                        | NO_KEGG_DATA        |
| V1769_s_at         | -1.750493798 | 0.00048698  | Decrease_in_adherent pepN; aminopeptidase N ; K01256 aminopeptidase N [EC:3.4.11.2]                                                                                                      | sdv:SDY_2325        |
| M3860_s_at         | -1.748822248 | 0.024211773 | Decrease_in_adherent parM; plasmid segregation protein ParM                                                                                                                              | ecw:EcE24377A_D0013 |
| b3305_s_at         | -1.746890375 | 0.018375607 | Decrease_in_adherent rplF; 50S ribosomal protein L6 ; K02933 large subunit ribosomal protein L6                                                                                          | sdv:SDY_3481        |
| EC869_4279_s_at    | -1.746689033 | 0.00262448  | Decrease_in_adherent channel protein, hemolysin III family ; K11068 hemolysin III                                                                                                        | sb:SBBS512_E3320    |
| EC869_1120_s_at    | -1.743127825 | 0.001018431 | Decrease_in_adherent hypothetical protein                                                                                                                                                | ecc:c1337           |
| K4295_at           | -1.740063711 | 0.033069276 | Decrease_in_adherent thrC; threonine synthase (EC:4.2.3.1); K01733 threonine synthase [EC:4.2.3.1]                                                                                       | af:AFE_0474         |
| A1678_s_at         | -1.739395196 | 0.041281348 | Decrease_in_adherent gor; glutathione reductase (EC:1.8.1.7); K00383 glutathione reductase (NADPH) [EC:1.8.1.7]                                                                          | sdv:SDY_3562        |

|                  |              |             |                                                                                                                                                                                      |                     |
|------------------|--------------|-------------|--------------------------------------------------------------------------------------------------------------------------------------------------------------------------------------|---------------------|
| A1495_s_at       | -1.737698826 | 0.015675347 | Decrease_in_adherent rpsQ; 30S ribosomal protein S17; K02961 small subunit ribosomal protein S17                                                                                     | ctu:ctu_38380       |
| F3897_s_at       | -1.737342394 | 0.048284675 | Decrease_in_adherent mdtE; multidrug efflux system protein MdtE                                                                                                                      | eum:ECUMN_4014      |
| A4654_s_at       | -1.737221273 | 0.030599896 | Decrease_in_adherent hypothetical protein                                                                                                                                            | sdv:SDY_1125        |
| V2361_s_at       | -1.73472973  | 0.017974573 | Decrease_in_adherent fliY; cystine transporter subunit ; K02424 cystine transport system substrate-binding protein                                                                   | sbv:SbBS512_E1048   |
| EC869_5213_s_at  | -1.733122336 | 0.005583259 | Decrease_in_adherent hypothetical protein                                                                                                                                            | sbo:SBO_0084        |
| A3683_s_at       | -1.72886288  | 0.04421857  | Decrease_in_adherent yccA; hypothetical protein ; K06890                                                                                                                             | sdv:SDY_0945        |
| c0823_s_at       | -1.727414561 | 0.003871711 | Decrease_in_adherent hypothetical protein                                                                                                                                            | ecc:c0824           |
| A3915_s_at       | -1.726160304 | 0.00297597  | Decrease_in_adherent hypothetical protein ; K09902 hypothetical protein                                                                                                              | sbv:SbBS512_E1334   |
| D4092_s_at       | -1.725015115 | 0.047008508 | Decrease_in_adherent NO_KEGG_DATA                                                                                                                                                    | NO_KEGG_DATA        |
| A3838_s_at       | -1.724342691 | 0.017630465 | Decrease_in_adherent cobB; NAD-dependent deacetylase ; K12410 NAD-dependent deacetylase [EC:3.5.1.-]                                                                                 | sdv:SDY_2030        |
| A1818_s_at       | -1.72186077  | 0.002644632 | Decrease_in_adherent glycosyl transferase, group 2 family protein (EC:2.4.1.-); K12983 UDP-glucose:(glucosyl)LPS beta-1,3-glucosyltransferase [EC:2.4.1.-]                           | sbv:SbBS512_E4050   |
| A1510_s_at       | -1.720459628 | 0.025536226 | Decrease_in_adherent rpsG; 30S ribosomal protein S7; K02992 small subunit ribosomal protein S7                                                                                       | ctu:ctu_38550       |
| b3963_s_at       | -1.719422105 | 0.008028911 | Decrease_in_adherent hypothetical protein                                                                                                                                            | ecw:EcE24377A_4522  |
| N4246_s_at       | -1.718394226 | 0.01861146  | Decrease_in_adherent gpmB; phosphoglycerate mutase (EC:5.4.2.1); K01834 phosphoglycerate mutase [EC:5.4.2.1]                                                                         | ssn:SSON_4545       |
| EC536_6355_s_at  | -1.717203224 | 0.015113682 | Decrease_in_adherent trpS; tryptophanyl-tRNA synthetase (EC:6.1.1.2); K01867 tryptophanyl-tRNA synthetase [EC:6.1.1.2]                                                               | sdv:SDY_3695        |
| A4012_at         | -1.716624053 | 0.040068154 | Decrease_in_adherent putative phage repressor protein CI                                                                                                                             | eoh:ECO103_1364     |
| A1577_s_at       | -1.714712065 | 0.017653884 | Decrease_in_adherent two component transcriptional regulator, winged helix family ; K07659 two-component system, OmpR family, phosphate regulon response regulator OmpR              | dze:DD1591_0244     |
| S55_4357_s_at    | -1.713309399 | 0.042639031 | Decrease_in_adherent yciR; RNase II stability modulator                                                                                                                              | sbo:SBO_1779        |
| A3569_s_at       | -1.713276958 | 0.022187305 | Decrease_in_adherent serS; seryl-tRNA synthetase (EC:6.1.1.11); K01875 seryl-tRNA synthetase [EC:6.1.1.11]                                                                           | sbo:SBO_0826        |
| A0889_s_at       | -1.711528261 | 0.001915644 | Decrease_in_adherent tas; putative aldo-keto reductase                                                                                                                               | sdv:SDY_3051        |
| A1226_s_at       | -1.71074424  | 0.004658954 | Decrease_in_adherent hypothetical protein                                                                                                                                            | sbv:SbBS512_E3469   |
| SVF_3790_s_at    | -1.709052244 | 0.000562954 | Decrease_in_adherent yieJ; hypothetical protein; K09925 hypothetical protein                                                                                                         | svf:SVF_3790        |
| EC52343_s_at     | -1.708520082 | 0.020105645 | Decrease_in_adherent tppB; putative tripeptide transporter permease ; K03305 proton-dependent oligopeptide transporter, POT family                                                   | sbv:SbBS512_E1824   |
| A3314_s_at       | -1.708155766 | 0.02294441  | Decrease_in_adherent nagE; N-acetyl glucosamine specific PTS system components IIABC (EC:2.7.1.69); K02802 PTS system, N-acetylglucosamine-specific IIA component [EC:2.7.1.69]; K00 | sbv:SbBS512_E0571   |
| A2049_s_at       | -1.707971342 | 0.04032529  | Decrease_in_adherent pepG; proline dipeptidase ; K01271 X-Pro dipeptidase [EC:3.4.13.9]                                                                                              | sdv:SDY_3898        |
| V3830_s_at       | -1.706342879 | 0.032157174 | Decrease_in_adherent cytosine deaminase ; K01485 cytosine deaminase [EC:3.5.4.1]                                                                                                     | set:SEN3167         |
| F1880_s_at       | -1.705394008 | 0.001909387 | Decrease_in_adherent putative inner membrane protein                                                                                                                                 | sdv:SDY_1676        |
| F0889_s_at       | -1.704970495 | 0.004905372 | Decrease_in_adherent hypothetical protein ; K01993 HlyD family secretion protein                                                                                                     | sdv:SDY_0808        |
| A3983_s_at       | -1.704576983 | 0.000423539 | Decrease_in_adherent oppB; oligopeptide transporter permease ; K02033 peptide/nickel transport system permease protein                                                               | sbc:SbBS1823        |
| D3362_x_at       | -1.70288442  | 0.027146805 | Decrease_in_adherent tkfA; transketolase (EC:2.2.1.1); K00615 transketolase [EC:2.2.1.1]                                                                                             | sbv:SbBS512_E3367   |
| V3434_s_at       | -1.702646006 | 0.018131005 | Decrease_in_adherent cysK; cysteine synthase A (EC:2.5.1.47); K01738 cysteine synthase A [EC:2.5.1.47]                                                                               | sbv:SbBS512_E2766   |
| A1492_s_at       | -1.702445341 | 0.017621213 | Decrease_in_adherent rpiE; 50S ribosomal protein L5 ; K02931 large subunit ribosomal protein L5                                                                                      | kpu:KPI_5029        |
| A4380_s_at       | -1.700481343 | 0.029013181 | Decrease_in_adherent speG; spermidine N1-acetyltransferase (EC:2.3.1.57); K00657 diamine N-acetyltransferase [EC:2.3.1.57]                                                           | efe:EFER_1522       |
| V1005_s_at       | -1.699519123 | 0.00802323  | Decrease_in_adherent phoP; DNA-binding transcriptional regulator PhoP ; K07660 two-component system, OmpR family, response regulator PhoP                                            | sdv:SDY_2022        |
| A1296_s_at       | -1.699186499 | 0.030391573 | Decrease_in_adherent hypothetical protein                                                                                                                                            | sbv:SbBS512_E3261   |
| pCoo049_x_at     | -1.690049743 | 0.010339596 | Decrease_in_adherent hypothetical protein                                                                                                                                            | ecw:EcE24377A_E0058 |
| V6012_s_at       | -1.676650985 | 0.042379986 | Decrease_in_adherent secF; preprotein translocase subunit SecF ; K03074 preprotein translocase subunit SecF                                                                          | sdv:SDY_0325        |
| V1254_s_at       | -1.674883019 | 0.001296897 | Decrease_in_adherent osmY; periplasmic protein ; K04065 hyperosmotically inducible periplasmic protein                                                                               | sdv:SDY_4526        |
| A4418_s_at       | -1.670569339 | 0.015858537 | Decrease_in_adherent himA; integration host factor alpha subunit ; K04764 integration host factor subunit alpha                                                                      | kpu:KPI_3278        |
| A0342_s_at       | -1.670188935 | 0.008729221 | Decrease_in_adherent NAD-binding domain-containing protein ; K07071                                                                                                                  | ecw:EcE24377A_2598  |
| V5400_s_at       | -1.670154781 | 0.029807069 | Decrease_in_adherent glgC; glucose-1-phosphate adenyltransferase (EC:2.7.7.27); K00975 glucose-1-phosphate adenyltransferase [EC:2.7.7.27]                                           | sdv:SDY_3576        |
| A1196_s_at       | -1.667538409 | 0.007773938 | Decrease_in_adherent yghA; oxidoreductase ; K00540 [EC:1.-.-.-]                                                                                                                      | ssn:SSON_3147       |
| F4396_s_at       | -1.66553788  | 0.00520734  | Decrease_in_adherent cpxP; periplasmic repressor CpxP ; K06006 periplasmic protein CpxP                                                                                              | ecm:ECMS35_4306     |
| A4684_s_at       | -1.66457765  | 0.043499133 | Decrease_in_adherent NO_KEGG_DATA                                                                                                                                                    | NO_KEGG_DATA        |
| APECO1_4078_s_at | -1.662837246 | 0.018768759 | Decrease_in_adherent govR; glycine cleavage system transcriptional repressor ; K03567 glycine cleavage system transcriptional repressor                                              | sdv:SDY_2668        |
| b3984_s_at       | -1.661343836 | 0.028468684 | Decrease_in_adherent rplA; 50S ribosomal protein L1 ; K02863 large subunit ribosomal protein L1                                                                                      | sdv:SDY_3744        |
| A2860_s_at       | -1.660606553 | 0.034304115 | Decrease_in_adherent dnaQ; DNA polymerase III subunit epsilon ; K02342 DNA polymerase III subunit epsilon [EC:2.7.7.7]                                                               | sdv:SDY_0234        |
| b2495_s_at       | -1.660176873 | 0.018793628 | Decrease_in_adherent putative oxidoreductase ; K00537 arsenate reductase [EC:1.20.4.1]                                                                                               | sdv:SDY_2684        |
| EC869_4790_s_at  | -1.652659921 | 0.030456522 | Decrease_in_adherent frr; ribosome recycling factor ; K02838 ribosome recycling factor                                                                                               | sdv:SDY_0188        |
| A1496_s_at       | -1.649927954 | 0.006473173 | Decrease_in_adherent rpmC; 50S ribosomal protein L29 ; K02904 large subunit ribosomal protein L29                                                                                    | sbv:SbBS512_E3697   |
| A0319_s_at       | -1.648243579 | 0.00186106  | Decrease_in_adherent nuoJ; NADH dehydrogenase subunit I (EC:1.6.9.5); K00338 NADH dehydrogenase I subunit I [EC:1.6.5.3]                                                             | sbv:SbBS512_E2657   |
| A3463_s_at       | -1.646884328 | 0.003998547 | Decrease_in_adherent ybhF; fused putative transporter subunits of ABC superfamily; ATP-binding components                                                                            | eoh:ECO103_0830     |
| EC869_3558_s_at  | -1.646477528 | 0.013250556 | Decrease_in_adherent ybiK; L-asparaginase ; K13051 beta-aspartyl-peptidase (threonine type) [EC:3.4.19.5]                                                                            | sbo:SBO_0718        |
| A2456_s_at       | -1.643800629 | 0.043460056 | Decrease_in_adherent mpl; UDP-N-acetylmuramate-L-alanyl-gamma-D-glutamyl-meso-diaminopimelate ligase; K02558 UDP-N-acetylmuramate: L-alanyl-gamma-D-glutamyl-meso-diaminopimelate    | eqj:EC026_5400      |
| c0827_s_at       | -1.64344264  | 0.00298906  | Decrease_in_adherent hypothetical protein; K03295 cation efflux system protein, CDF family                                                                                           | ecc:c0827           |
| V3607_s_at       | -1.64199898  | 0.009626584 | Decrease_in_adherent hypothetical protein                                                                                                                                            | sdv:SDY_2683        |
| EC869_0939_s_at  | -1.641897636 | 0.015231576 | Decrease_in_adherent NADH dehydrogenase subunit K ; K00340 NADH dehydrogenase I subunit K [EC:1.6.5.3]                                                                               | cko:CKO_00517       |
| A1018_s_at       | -1.641578359 | 0.015790553 | Decrease_in_adherent gshB; glutathione synthetase (EC:6.3.2.3); K01920 glutathione synthase [EC:6.3.2.3]                                                                             | ssn:SSON_3101       |
| A2040_s_at       | -1.640824428 | 0.028016348 | Decrease_in_adherent tsaB; twin arginine translocase protein A ; K03116 sec-independent protein translocase protein TsaA                                                             | sdv:SDY_3907        |
| V5388_s_at       | -1.639835903 | 0.001289259 | Decrease_in_adherent asd; aspartate-semialdehyde dehydrogenase (EC:1.2.1.11); K00133 aspartate-semialdehyde dehydrogenase [EC:1.2.1.11]                                              | sbv:SbBS512_E3891   |
| V2945_s_at       | -1.639605229 | 0.034531355 | Decrease_in_adherent ygdP; dinucleoside polyphosphate hydrolase ; K06311 putative (di)nucleoside polyphosphate hydrolase [EC:3.6.1.-]                                                | sdv:SDY_3047        |
| V3168_s_at       | -1.639068669 | 0.00744064  | Decrease_in_adherent nuoL; NADH:ubiquinone oxidoreductase, membrane subunit L ; K00341 NADH dehydrogenase I subunit L [EC:1.6.5.3]                                                   | eqj:EC026_3266      |
| SDY_2200_s_at    | -1.639027288 | 0.007821037 | Decrease_in_adherent hypothetical protein                                                                                                                                            | sdv:SDY_2200        |
| A2631_s_at       | -1.637981709 | 0.006741756 | Decrease_in_adherent nmpR; nicotinamide-nucleotide adenyltransferase (EC:2.7.7.1); K00952 nicotinamide-nucleotide adenyltransferase [EC:2.7.7.1]; K06210 ribosylnicotinamide kinase  | sbv:SbBS512_E4937   |
| S55_2456_s_at    | -1.637671106 | 0.007244861 | Decrease_in_adherent sadA; hypothetical protein ; K06186 small protein A                                                                                                             | sdv:SDY_2790        |
| SD1_3251_s_at    | -1.633291994 | 0.00187194  | Decrease_in_adherent tyrS; tyrosyl-tRNA synthetase (EC:6.1.1.1); K01866 tyrosyl-tRNA synthetase [EC:6.1.1.1]                                                                         | sdv:SDY_1860        |
| V6884_s_at       | -1.630586981 | 0.028966892 | Decrease_in_adherent visC; hypothetical protein                                                                                                                                      | sdv:SDY_3175        |
| A2716_s_at       | -1.628467841 | 0.024876342 | Decrease_in_adherent leuD; isopropylmalate isomerase small subunit (EC:4.2.1.33); K01704 3-isopropylmalate/(R)-2-methylmalate dehydratase [EC:4.2.1.33]                              | sbv:SbBS512_E0065   |
| F1141_s_at       | -1.627461808 | 6.53E-05    | Decrease_in_adherent hypothetical protein                                                                                                                                            | ecc:c1317           |
| EC536_5731_s_at  | -1.62676711  | 0.027296643 | Decrease_in_adherent ycgR; hypothetical protein                                                                                                                                      | sdv:SDY_1233        |
| A3063_s_at       | -1.625451342 | 0.00036009  | Decrease_in_adherent yajD; hypothetical protein                                                                                                                                      | sdv:SDY_0324        |
| V7379_s_at       | -1.625431337 | 0.034998557 | Decrease_in_adherent putative 5-methylcytosine-specific restriction enzyme with GTPase activity (EC:3.1.21.-)                                                                        | efe:EFER_3105       |
| EC869_0561_x_at  | -1.620945162 | 0.046831121 | Decrease_in_adherent yhiQ; putative methyltransferase                                                                                                                                | ecw:APECO1_2956     |
| V0207_s_at       | -1.620246915 | 0.010707431 | Decrease_in_adherent NO_KEGG_DATA                                                                                                                                                    | NO_KEGG_DATA        |

|                  |              |              |                                                                                                                                                                                               |                   |
|------------------|--------------|--------------|-----------------------------------------------------------------------------------------------------------------------------------------------------------------------------------------------|-------------------|
| SD1_0307_s_at    | -1.618824902 | 0.002112564  | Decrease_in_adherent tref; trehalase [EC:3.2.1.28]; K01194 alpha,alpha-trehalase [EC:3.2.1.28]                                                                                                | sbcsbBS512_E3922  |
| V4574_s_at       | -1.615711834 | 0.016828519  | Decrease_in_adherent NO_KEGG_DATA                                                                                                                                                             | NO_KEGG_DATA      |
| F1250_s_at       | -1.614756871 | 0.022446867  | Decrease_in_adherent ycgJ; hypothetical protein                                                                                                                                               | ect:ECIAI39_1896  |
| EC869_0750_s_at  | -1.613928965 | 0.019775783  | Decrease_in_adherent yhjL; putative oxidoreductase subunit                                                                                                                                    | sbo:SBO_3529      |
| SDY_3666_x_at    | -1.611179373 | 0.013121289  | Decrease_in_adherent yhgG; hypothetical protein; K07490 ferrous iron transport protein C                                                                                                      | sdysDY_3666       |
| S3180_s_at       | -1.610551158 | 0.012360849  | Decrease_in_adherent reverse transcriptase-like protein                                                                                                                                       | sfx:S3180         |
| L1644_s_at       | -1.608944878 | 0.047583691  | Decrease_in_adherent mvpT; putative post-segregational killing toxin                                                                                                                          | eqj:ECO26_3521    |
| A1581_s_at       | -1.607631668 | 0.000117617  | Decrease_in_adherent feoA; ferrous iron transport protein A; K04758 ferrous iron transport protein A                                                                                          | cko:CKO_04830     |
| V4620_s_at       | -1.602980588 | 0.007642838  | Decrease_in_adherent htrA; serine endoprotease; K04771 serine protease Do [EC:3.4.21.107]                                                                                                     | sdysDY_0178       |
| EC536_0055_s_at  | -1.598889469 | 0.002910206  | Decrease_in_adherent galactokinase; K00849 galactokinase [EC:2.7.1.6]                                                                                                                         | cko:CKO_02378     |
| A0182_s_at       | -1.594864655 | 0.001786827  | Decrease_in_adherent odd; cytidine deaminase [EC:3.5.4.5]; K01489 cytidine deaminase [EC:3.5.4.5]                                                                                             | sbcsbBS512_E0828  |
| SB5_1853_s_at    | -1.592131549 | 0.003154844  | Decrease_in_adherent tkb; transketolase [EC:2.2.1.1]; K00615 transketolase [EC:2.2.1.1]                                                                                                       | sfx:S2658         |
| D3279_s_at       | -1.584015188 | 0.000629456  | Decrease_in_adherent DNA-binding transcriptional repressor AIIr; K10973 IclR family transcriptional regulator, negative regulator of allantoin and glyoxylate utilization operons             | ecy:ECSE_0532     |
| A1959_s_at       | -1.574342741 | 0.0406893871 | Decrease_in_adherent rbsB; D-ribose transporter subunit RbsB; K10439 ribose transport system substrate-binding protein                                                                        | efe:EFER_4050     |
| F4817_s_at       | -1.573817653 | 0.032808649  | Decrease_in_adherent ppa; inorganic pyrophosphatase [EC:3.6.1.1]; K01507 inorganic pyrophosphatase [EC:3.6.1.1]                                                                               | sdysDY_4462       |
| A3247_s_at       | -1.57347258  | 0.011952844  | Decrease_in_adherent rna; ribonuclease I [EC:3.1.27.6]; K01169 ribonuclease I (enterobacter ribonuclease) [EC:3.1.27.6]                                                                       | ebr:ECB_00579     |
| V1601_s_at       | -1.573302778 | 0.012362428  | Decrease_in_adherent NO_KEGG_DATA                                                                                                                                                             | NO_KEGG_DATA      |
| EC869_3950_s_at  | -1.570580555 | 0.004100288  | Decrease_in_adherent NO_KEGG_DATA                                                                                                                                                             | NO_KEGG_DATA      |
| V7152_s_at       | -1.570445107 | 0.006795561  | Decrease_in_adherent nfnB; dihydropteridine reductase [EC:1.5.1.34]; K10679 nitroreductase / dihydropteridine reductase [EC:1.5.1.34]                                                         | sdysDY_0491       |
| EC869_3782_s_at  | -1.56922404  | 0.024451685  | Decrease_in_adherent rplD; 50S ribosomal protein L4; K02926 large subunit ribosomal protein L4                                                                                                | cko:CKO_04737     |
| A0318_s_at       | -1.566668235 | 7.13E-05     | Decrease_in_adherent nuoJ; NADH dehydrogenase subunit J [EC:1.6.5.3]; K00339 NADH dehydrogenase I subunit J [EC:1.6.5.3]                                                                      | sdysDY_2476       |
| V7078_s_at       | -1.566444587 | 0.0446761    | Decrease_in_adherent yebZ; putative inner membrane protein; K07245 putative copper resistance protein D                                                                                       | eqj:ECO26_2678    |
| EC869_8837_s_at  | -1.564933419 | 0.013311508  | Decrease_in_adherent glx; glutamyl-tRNA synthetase [EC:6.1.1.17]; K01885 glutamyl-tRNA synthetase [EC:6.1.1.17]                                                                               | sdysDY_2600       |
| A4682_s_at       | -1.563538727 | 0.02056037   | Decrease_in_adherent aspS; aspartyl-tRNA synthetase [EC:6.1.1.12]; K01876 aspartyl-tRNA synthetase [EC:6.1.1.12]                                                                              | sbcsbBS512_E1106  |
| M2167_x_at       | -1.563230134 | 0.000105127  | Decrease_in_adherent endopeptidase; K01423 [EC:3.4.-.-]                                                                                                                                       | sfv:SFV_0211      |
| SD1_2278_s_at    | -1.562644161 | 0.001438625  | Decrease_in_adherent lysA; diaminopimelate decarboxylase [EC:4.1.1.20]; K01586 diaminopimelate decarboxylase [EC:4.1.1.20]                                                                    | ssn:SSON_2998     |
| F1202_s_at       | -1.562611776 | 0.023097768  | Decrease_in_adherent ycfM; hypothetical protein; K07337 hypothetical protein                                                                                                                  | sdysDY_2045       |
| V2049_s_at       | -1.557026845 | 0.044372267  | Decrease_in_adherent yqjE; hypothetical protein                                                                                                                                               | sdysDY_3286       |
| b3790_s_at       | -1.55405187  | 0.000342611  | Decrease_in_adherent wecD; TDP-fucosamine acetyltransferase                                                                                                                                   | sdysDY_3958       |
| A0673_at         | -1.553787164 | 0.00353486   | Decrease_in_adherent hypothetical protein                                                                                                                                                     | ecw:EC24377A_2927 |
| A1031_s_at       | -1.553122467 | 0.0010645    | Decrease_in_adherent yggL; hypothetical protein; K09923 hypothetical protein                                                                                                                  | sdysDY_3113       |
| SB5_0774_s_at    | -1.552329206 | 0.029086134  | Decrease_in_adherent hypothetical protein                                                                                                                                                     | ecw:EC24377A_4522 |
| A1489_s_at       | -1.550311605 | 0.032378708  | Decrease_in_adherent rplR; 50S ribosomal protein L18; K02881 large subunit ribosomal protein L18                                                                                              | cko:CKO_04717     |
| UT189_C1546_s_at | -1.549705743 | 0.025794832  | Decrease_in_adherent hypothetical protein                                                                                                                                                     | ecz:ECSS8_1415    |
| V2162_s_at       | -1.54565621  | 0.048811663  | Decrease_in_adherent lldD; protease TldD; K03568 TldD protein                                                                                                                                 | ssn:SSON_3386     |
| EC869_1162_s_at  | -1.545442845 | 0.014010044  | Decrease_in_adherent fabG; 3-oxoacyl-(acyl-carrier-protein) reductase [EC:1.1.1.100]; K00059 3-oxoacyl-(acyl-carrier protein) reductase [EC:1.1.1.100]                                        | sdysDY_2057       |
| c3048_s_at       | -1.541308841 | 0.028353638  | Decrease_in_adherent pepB; peptidase B; K07751 PepB aminopeptidase [EC:3.4.11.23]                                                                                                             | efl:LF8_1612      |
| A3801_s_at       | -1.538598788 | 0.002038787  | Decrease_in_adherent rme; RNase E; endoribonuclease for rRNA processing and mRNA degradation; K08300 ribonuclease E [EC:3.1.26.12]                                                            | hde:HDEF_0352     |
| EC869_5510_s_at  | -1.535793921 | 0.039951071  | Decrease_in_adherent accD; acetyl-CoA carboxylase biotin carboxylase subunit [EC:6.4.1.2]; K01946 biotin carboxylase [EC:6.3.4.14]; K01961 acetyl-CoA carboxylase, biotin carboxylase subunit | sdysDY_3433       |
| A0328_s_at       | -1.53577289  | 0.037978916  | Decrease_in_adherent aminotransferase AlaT; K10907 aminotransferase [EC:2.6.1.-]                                                                                                              | sbcsbBS512_E2666  |
| EC536_2685_s_at  | -1.535636951 | 0.032191106  | Decrease_in_adherent hypothetical protein                                                                                                                                                     | ecc:c0222         |
| b2021_s_at       | -1.53517466  | 0.0131934    | Decrease_in_adherent NO_KEGG_DATA                                                                                                                                                             | NO_KEGG_DATA      |
| V4101_s_at       | -1.517120241 | 0.012831768  | Decrease_in_adherent NO_KEGG_DATA                                                                                                                                                             | NO_KEGG_DATA      |
| A1555_s_at       | -1.515672113 | 0.034084815  | Decrease_in_adherent gph; phosphoglycolate phosphatase [EC:3.1.3.18]; K01091 phosphoglycolate phosphatase [EC:3.1.3.18]                                                                       | ecw:EC24377A_3854 |
| A1014_s_at       | -1.512656986 | 3.42E-05     | Decrease_in_adherent galP; galactose-proton symport of transport system; K08137 MFS transporter, SP family, galactose:H+ symporter                                                            | sdysDY_3129       |
| SF0484_s_at      | -1.512613447 | 0.009793291  | Decrease_in_adherent iso-1S10R ORF                                                                                                                                                            | sfi:SF0484        |
| SD1_1427_x_at    | -1.51200961  | 0.003420286  | Decrease_in_adherent rne; fused ribonucleaseE: endoribonuclease/RNA-binding protein/RNA degradosome binding protein; K08300 ribonuclease E [EC:3.1.26.12]                                     | ebw:BWG_0932      |
| V5454_s_at       | -1.511963768 | 0.001216156  | Decrease_in_adherent NO_KEGG_DATA                                                                                                                                                             | NO_KEGG_DATA      |
| SB5_0443_s_at    | -1.505323053 | 0.008964842  | Decrease_in_adherent rrdG; anaerobic ribonucleotide reductase-activating protein; K04068 anaerobic ribonucleoside-triphosphate reductase activating protein [EC:1.97.1.4]                     | sdysDY_4256       |
| b1207_s_at       | -1.503362575 | 0.001230121  | Decrease_in_adherent prsA; ribose-phosphate pyrophosphokinase [EC:2.7.6.1]; K00948 ribose-phosphate pyrophosphokinase [EC:2.7.6.1]                                                            | sdysDY_1256       |
| D4502_s_at       | -1.503128248 | 0.040351391  | Decrease_in_adherent putative relaxase/mobilization nuclease domain protein                                                                                                                   | seh:SeHA_A0074    |
| A2816_s_at       | -1.499793395 | 0.029358933  | Decrease_in_adherent hypothetical protein                                                                                                                                                     | ecv:APEC01_1817   |
| G3295_s_at       | -1.499699747 | 0.047939484  | Decrease_in_adherent prc; carboxy-terminal protease [EC:3.4.21.102]; K03797 carboxyl-terminal processing protease [EC:3.4.21.102]                                                             | sdysDY_1978       |
| G1166_s_at       | -1.499641713 | 0.009425926  | Decrease_in_adherent hypothetical protein                                                                                                                                                     | ecz:ECSS8_1415    |
| b2217_s_at       | -1.496938981 | 0.018232624  | Decrease_in_adherent transcriptional regulator RcsB; K07687 two-component system, NarL family, captular synthesis response regulator RcsB                                                     | cko:CKO_00553     |
| SFV_2319_s_at    | -1.496934695 | 0.015199342  | Decrease_in_adherent competence damage-inducible protein A; K03742 competence/damage-inducible protein ClnA                                                                                   | ssn:SSON_2310     |
| A0802_s_at       | -1.492762397 | 0.006715908  | Decrease_in_adherent cysH; phosphoadenosine phosphosulfate reductase [EC:1.8.4.8]; K00390 phosphoadenosine phosphosulfate reductase [EC:1.8.4.8]                                              | sfx:S2971         |
| A0900_s_at       | -1.489741478 | 0.042506358  | Decrease_in_adherent acetyl-CoA acetyltransferase [EC:2.3.1.-]; K00626 acetyl-CoA C-acetyltransferase [EC:2.3.1.9]                                                                            | ecw:EC24377A_3166 |
| A3788_s_at       | -1.488068149 | 0.031033762  | Decrease_in_adherent flgM; anti-sigma28 factor FlgM; K02398 negative regulator of flagellin synthesis FlgM                                                                                    | sdysDY_2081       |
| A1490_s_at       | -1.487594768 | 0.039986565  | Decrease_in_adherent hypothetical protein                                                                                                                                                     | ecti:UTI89_C3754  |
| V0964_s_at       | -1.486493736 | 0.017878764  | Decrease_in_adherent hypothetical protein                                                                                                                                                     | sbcsbBS512_E3562  |
| H3457_x_at       | -1.486301116 | 0.013044112  | Decrease_in_adherent yhgG; hypothetical protein; K07490 ferrous iron transport protein C                                                                                                      | sfv:SFV_3415      |
| V1302_s_at       | -1.482902183 | 0.003892638  | Decrease_in_adherent putative ABC transporter ATP-binding protein                                                                                                                             | cko:CKO_03395     |
| V3622_x_at       | -1.481767453 | 0.000542033  | Decrease_in_adherent purN; phosphoribosylglycinamide formyltransferase [EC:2.1.2.2]; K1175 phosphoribosylglycinamide formyltransferase 1 [EC:2.1.2.2]                                         | sdysDY_2689       |
| SD1_3080_s_at    | -1.48160651  | 0.048184272  | Decrease_in_adherent proline dipeptidase; K10271 X-Pro dipeptidase [EC:3.4.13.9]                                                                                                              | cko:CKO_00190     |
| A2772_s_at       | -1.480144803 | 0.000330759  | Decrease_in_adherent yadH; hypothetical protein; K09686 antibiotic transport system permease protein                                                                                          | sdysDY_0037       |
| SB5_0350_s_at    | -1.47770482  | 0.01261471   | Decrease_in_adherent ppiA; peptidyl-prolyl cis-trans isomerase A (rotamase A); K03767 peptidyl-prolyl cis-trans isomerase A (cyclophilin A) [EC:5.2.1.8]                                      | sdysDY_3525       |
| A2392_s_at       | -1.476684965 | 0.045619405  | Decrease_in_adherent hflC; FtsH protease regulator HflC [EC:3.4.-.-]; K04087 membrane protease subunit HflC [EC:3.4.-.-]                                                                      | sbcsbBS512_E4706  |
| V1059_s_at       | -1.476004659 | 2.13E-05     | Decrease_in_adherent acrB; acridine efflux pump; K03296 hydrophobic/ampiphilic exporter-1 (mainly G-bacteria), HAE1 family                                                                    | sbo:SBO_0362      |
| EC869_8432_s_at  | -1.474526348 | 0.013634391  | Decrease_in_adherent NO_KEGG_DATA                                                                                                                                                             | NO_KEGG_DATA      |
| A0419_s_at       | -1.470270858 | 0.002334464  | Decrease_in_adherent glk; glucokinase [EC:2.7.1.2]; K00845 glucokinase [EC:2.7.1.2]                                                                                                           | sdysDY_2587       |
| A1747_s_at       | -1.469933919 | 0.011867449  | Decrease_in_adherent glyS; glycyl-tRNA synthetase subunit beta [EC:6.1.1.14]; K01879 glycyl-tRNA synthetase beta chain [EC:6.1.1.14]                                                          | sbcsbBS512_E3966  |
| M4990_s_at       | -1.469123938 | 0.005769444  | Decrease_in_adherent trxB; thioredoxin reductase; K00384 thioredoxin reductase (NADPH) [EC:1.8.1.9]                                                                                           | sdysDY_2373       |
| V5015_s_at       | -1.467849712 | 0.000840522  | Decrease_in_adherent lldR; DNA-binding transcriptional repressor LldR                                                                                                                         | sdysDY_4037       |

|                  |              |              |                                                                                                                                                                                         |                  |
|------------------|--------------|--------------|-----------------------------------------------------------------------------------------------------------------------------------------------------------------------------------------|------------------|
| ECs4252_x_at     | -1.466875815 | 0.021817694  | Decrease_in_adherent yhgG; hypothetical protein ; K07490 ferrous iron transport protein C                                                                                               | sdv:SDY_3666     |
| A1609_s_at       | -1.466437685 | 0.045707056  | Decrease_in_adherent glgB; glycogen branching enzyme (EC:2.4.1.18); K00700 1,4-alpha-glucan branching enzyme [EC:2.4.1.18]                                                              | ssn:SSON_3672    |
| C4081_s_at       | -1.460249079 | 0.0173055029 | Decrease_in_adherent hypothetical protein                                                                                                                                               | sec:SC3369       |
| V2948_x_at       | -1.458680255 | 0.000358291  | Decrease_in_adherent hchA; chaperone protein HchA ; K05523 molecular chaperone HchA (Hsp31)                                                                                             | sb:SBBS512_E0916 |
| A0983_s_at       | -1.45543652  | 0.034056859  | Decrease_in_adherent mscS; mechanosensitive channel MscS ; K03442 small conductance mechanosensitive ion channel, MscS family                                                           | sb:SBBS512_E3349 |
| ECP_0709_s_at    | -1.455034748 | 0.005808913  | Decrease_in_adherent pgm; phosphoglucomutase ; K01835 phosphoglucomutase [EC:5.4.2.2]                                                                                                   | efl:LF82_1632    |
| V4600_s_at       | -1.449635547 | 0.022731442  | Decrease_in_adherent ppa; inorganic pyrophosphatase (EC:3.6.1.1); K01507 inorganic pyrophosphatase [EC:3.6.1.1]                                                                         | sdv:SDY_4462     |
| V0762_s_at       | -1.449488602 | 0.03972489   | Decrease_in_adherent pepG; proline dipeptidase ; K01271 X-Pro dipeptidase [EC:3.4.13.9]                                                                                                 | sdv:SDY_3898     |
| SS5_2237_x_at    | -1.436151886 | 0.019050038  | Decrease_in_adherent NO_KEGG_DATA                                                                                                                                                       | NO_KEGG_DATA     |
| EC869_4066_s_at  | -1.435257927 | 0.000489539  | Decrease_in_adherent mukB; cell division protein MukB ; K03632 chromosome partition protein MukB                                                                                        | sdv:SDY_2334     |
| V3982_s_at       | -1.433665134 | 0.001818027  | Decrease_in_adherent trpB; tryptophan synthase subunit beta (EC:4.2.1.20); K01696 tryptophan synthase beta chain [EC:4.2.1.20]                                                          | sfv:SFV_1275     |
| V6739_s_at       | -1.431673195 | 0.023568372  | Decrease_in_adherent murC; UDP-N-acetylmuramate-L-alanine ligase; K01924 UDP-N-acetylmuramate-alanine ligase [EC:6.3.2.8]                                                               | eci:EcoIC_3566   |
| b2185_s_at       | -1.430873445 | 0.027531619  | Decrease_in_adherent rplY; 50S ribosomal protein L25 ; K02897 large subunit ribosomal protein L25                                                                                       | sdv:SDY_0894     |
| A1637_s_at       | -1.429790984 | 0.004630401  | Decrease_in_adherent hypothetical protein                                                                                                                                               | eci:ECIAI1_3605  |
| V1006_s_at       | -1.428956047 | 0.038981148  | Decrease_in_adherent purB; adenylosuccinate lyase (EC:4.3.2.2); K01756 adenylosuccinate lyase [EC:4.3.2.2]                                                                              | pha:PSHAA1692    |
| UT189_C1474_x_at | -1.423761073 | 0.025354675  | Decrease_in_adherent putative cell killing protein encoded within cryptic prophage CP-933M                                                                                              | eci:UT189_C1474  |
| A0055_x_at       | -1.420576362 | 0.006661997  | Decrease_in_adherent hisD; histidinol dehydrogenase (EC:1.1.1.23); K00013 histidinol dehydrogenase [EC:1.1.1.23]                                                                        | ebi:ECB_01922    |
| EC869_5557_x_at  | -1.41825009  | 0.019302237  | Decrease_in_adherent argI; ornithine carbamoyltransferase subunit I (EC:2.1.3.3); K00611 ornithine carbamoyltransferase [EC:2.1.3.3]                                                    | sbo:SBO_4188     |
| A0826_s_at       | -1.417853609 | 0.034427831  | Decrease_in_adherent chpR; antitoxin MazE ; K07172                                                                                                                                      | sdv:SDY_3000     |
| V1239_s_at       | -1.414461334 | 6.96E-05     | Decrease_in_adherent ribosomal protein S1 ; K02945 small subunit ribosomal protein S1                                                                                                   | dze:Dd1591_2339  |
| V4019_s_at       | -1.413029343 | 0.015329926  | Decrease_in_adherent NO_KEGG_DATA                                                                                                                                                       | NO_KEGG_DATA     |
| b2431_s_at       | -1.408537822 | 0.000325019  | Decrease_in_adherent ybi110; hypothetical protein                                                                                                                                       | ebi:B21_02292    |
| V1149_s_at       | -1.407658168 | 0.019037174  | Decrease_in_adherent purK; phosphoribosylaminoimidazole carboxylase ATPase subunit (EC:4.1.1.21); K01589 5-(carboxyamino)imidazole ribonucleotide synthase [EC:6.3.4.18]                | sdv:SDY_0274     |
| SS5_3158_x_at    | -1.406770266 | 0.002876811  | Decrease_in_adherent yhgG; hypothetical protein ; K07490 ferrous iron transport protein C                                                                                               | ssn:SSON_3541    |
| UT189_C2914_x_at | -1.401255607 | 0.002160836  | Decrease_in_adherent hypothetical protein                                                                                                                                               | eci:UT189_C2914  |
| V1262_s_at       | -1.396509388 | 0.008070028  | Decrease_in_adherent FadR; fatty acid metabolism regulator ; K03603 GntR family transcriptional regulator, negative regulator for Fad regulon and positive regulator of fabA            | sdv:SDY_1224     |
| V3422_s_at       | -1.394840204 | 0.005760149  | Decrease_in_adherent kefG; glutathione-regulated potassium-efflux system ancillary protein KefG ; K11748 glutathione-regulated potassium-efflux system ancillary protein KefG           | efe:EFER_3322    |
| EC869_4608_x_at  | -1.394020095 | 0.000802993  | Decrease_in_adherent pgm; phosphoglucomutase (EC:5.4.2.2); K01835 phosphoglucomutase [EC:5.4.2.2]                                                                                       | sdv:SDY_0628     |
| EC869_1169_s_at  | -1.391775867 | 0.008386427  | Decrease_in_adherent fabF; 3-oxoacyl-(acyl carrier protein) synthase ; K00458 3-oxoacyl-(acyl-carrier-protein) synthase II [EC:2.3.1.179]                                               | kpu:KP1_2084     |
| D3528_s_at       | -1.387158144 | 0.010391819  | Decrease_in_adherent predicted hydrolase                                                                                                                                                | ech:ECO103_p46   |
| SFV_3581_s_at    | -1.384897698 | 0.038346051  | Decrease_in_adherent cpxR; DNA-binding transcriptional regulator CpxR ; K07662 two-component system, OmpR family, response regulator CpxR                                               | sdv:SDY_3834     |
| V6992_s_at       | -1.381446465 | 0.037470992  | Decrease_in_adherent hypothetical protein ; K05875 methyl-accepting chemotaxis protein II, aspartate sensor receptor                                                                    | cko:CKO_01066    |
| EC869_0400_s_at  | -1.379860992 | 0.030307901  | Decrease_in_adherent yhcG; glutathione branching enzyme ; K00700 1,4-alpha-glucan branching enzyme [EC:2.4.1.18]                                                                        | cko:CKO_04851    |
| A1375_s_at       | -1.378988349 | 0.001189673  | Decrease_in_adherent glmM; phosphoglucoamine mutase (EC:5.4.2.10); K03431 phosphoglucoamine mutase [EC:5.4.2.10]                                                                        | sb:SBBS512_E3594 |
| F4327_s_at       | -1.377559528 | 7.52E-05     | Decrease_in_adherent hypothetical protein                                                                                                                                               | bmi:BMULJ_05092  |
| A0497_s_at       | -1.376358846 | 0.024269837  | Decrease_in_adherent bcp; thioredoxin-dependent thiol peroxidase (EC:1.11.1.7); K03564 peroxiredoxin Q/BPC [EC:1.11.1.15]                                                               | sdv:SDY_2669     |
| A3580_at         | -1.375927391 | 7.59E-05     | Decrease_in_adherent Cl; bacteriophage CI repressor protein                                                                                                                             | yen:YE0854       |
| EC869_5021_s_at  | -1.374536213 | 0.018790494  | Decrease_in_adherent sdhD; succinate dehydrogenase cytochrome b556 small membrane subunit (EC:1.3.5.1); K00242 succinate dehydrogenase hydrophobic membrane anchor protein [EC:1.3.5.1] | sdv:SDY_0660     |
| V4970_s_at       | -1.367880322 | 0.033697774  | Decrease_in_adherent rfaG; lipopolysaccharide core biosynthesis protein RfaG ; K02844 UDP-glucose:(heptosyl)lPS alpha-1,3-glucosyltransferase [EC:2.4.1.-]                              | sb:SBBS512_E4056 |
| A3498_s_at       | -1.366841776 | 2.65E-06     | Decrease_in_adherent moeB; molybdopterin biosynthesis protein MoeB; K03751 molybdopterin biosynthesis protein MoeB                                                                      | eci:ECIAI1_0865  |
| EC869_5202_s_at  | -1.36535142  | 0.025559543  | Decrease_in_adherent secA, azi, div; preprotein translocase subunit SecA ; K03070 preprotein translocase subunit SecA                                                                   | sdv:SDY_0128     |
| c5600_s_at       | -1.36506866  | 0.002361873  | Decrease_in_adherent ybi4; hypothetical protein                                                                                                                                         | ebi:B21_00199    |
| b3231_s_at       | -1.363362691 | 0.04746774   | Decrease_in_adherent rplM; 50S ribosomal protein L13; K02871 large subunit ribosomal protein L13                                                                                        | sfv:SFV_3258     |
| V1915_s_at       | -1.362847507 | 0.042974055  | Decrease_in_adherent hflB; ATP-dependent metalloprotease (EC:3.4.24.-); K03798 cell division protease FtsH [EC:3.4.24.-]                                                                | sb:SBBS512_E3592 |
| SFV_1321_x_at    | -1.359732447 | 0.000646949  | Decrease_in_adherent pspD; peripheral inner membrane phage-shock protein; K03971 phage shock protein D                                                                                  | sfv:SFV_1321     |
| V1240_s_at       | -1.357029198 | 0.01851577   | Decrease_in_adherent ribosomal protein S1 ; K02945 small subunit ribosomal protein S1                                                                                                   | dze:Dd1591_2339  |
| V3161_s_at       | -1.353179025 | 0.001248454  | Decrease_in_adherent nuoH; NADH dehydrogenase subunit H (EC:1.6.5.3); K00337 NADH dehydrogenase I subunit H [EC:1.6.5.3]                                                                | sdv:SDY_2478     |
| F0029_s_at       | -1.352976214 | 0.000519044  | Decrease_in_adherent lrpA; lipoprotein signal peptidase ; K03101 signal peptidase II [EC:3.4.23.36]                                                                                     | cko:CKO_03365    |
| A4488_s_at       | -1.347928361 | 0.04337477   | Decrease_in_adherent ynhE; cysteine desulfurase activator complex subunit SufB ; K09014 Fe-S cluster assembly protein SufB                                                              | sbo:SBO_1447     |
| F2472_s_at       | -1.347633567 | 0.004372622  | Decrease_in_adherent yejK; nucleoid-associated protein NdpA ; K06899                                                                                                                    | sdv:SDY_0893     |
| A0051_s_at       | -1.341481933 | 0.048258759  | Decrease_in_adherent NAD dependent epimerase/dehydratase family protein                                                                                                                 | sb:SBBS512_E1216 |
| A0351_s_at       | -1.336885598 | 0.038534518  | Decrease_in_adherent cvpA; colicin V production protein ; K03558 membrane protein required for colicin V production                                                                     | sdv:SDY_2512     |
| K0352_x_at       | -1.332610653 | 0.002205339  | Decrease_in_adherent pspD; peripheral inner membrane phage-shock protein; K03971 phage shock protein D                                                                                  | sfv:SFV_1321     |
| S3181_s_at       | -1.329085313 | 0.043404387  | Decrease_in_adherent reverse transcriptase-like protein                                                                                                                                 | sfx:SC3181       |
| b3724_s_at       | -1.328972427 | 0.016432199  | Decrease_in_adherent PhoU; transcriptional regulator PhoU ; K02039 phosphate transport system protein                                                                                   | sdv:SDY_4026     |
| EC869_2084_s_at  | -1.320832723 | 0.011951317  | Decrease_in_adherent dsbE; disulfide oxidoreductase ; K02199 cytochrome c biogenesis protein CcmG, thiol:disulfide interchange protein DsbE                                             | eci:EC026_1059   |
| SD1_3598_s_at    | -1.319774457 | 0.000886451  | Decrease_in_adherent galM; aldose 1-epimerase (EC:5.1.3.-); K01785 aldose 1-epimerase [EC:5.1.3.3]                                                                                      | sb:SBBS512_E0677 |
| SBO_3496_s_at    | -1.318700453 | 2.23E-05     | Decrease_in_adherent prfC; oligopeptidase A (EC:3.4.24.70); K01414 oligopeptidase A [EC:3.4.24.70]                                                                                      | sb:SBBS512_E3824 |
| A1046_s_at       | -1.318693895 | 0.002082045  | Decrease_in_adherent conserved hypothetical protein, putative ATPase                                                                                                                    | eci:EC55989_3266 |
| b3410_x_at       | -1.306944873 | 0.035894927  | Decrease_in_adherent yhgG; hypothetical protein ; K07490 ferrous iron transport protein C                                                                                               | sdv:SDY_3666     |
| b0932_s_at       | -1.306762313 | 0.006666602  | Decrease_in_adherent pepN; aminopeptidase N; K01256 aminopeptidase N [EC:3.4.11.2]                                                                                                      | sdv:SDY_4532     |
| b2701_s_at       | -1.305840898 | 0.004214056  | Decrease_in_adherent NO_KEGG_DATA                                                                                                                                                       | NO_KEGG_DATA     |
| A2257_s_at       | -1.302553983 | 0.031326228  | Decrease_in_adherent dgkA; diacylglycerol kinase ; K00901 diacylglycerol kinase [EC:2.7.1.107]                                                                                          | sdv:SDY_4532     |
| c5177_x_at       | -1.296694604 | 0.049308095  | Decrease_in_adherent transposase ORF A, IS629                                                                                                                                           | eum:ECUMN_3344   |
| A4704_s_at       | -1.293289749 | 0.031506872  | Decrease_in_adherent tap; methyl-accepting protein IV ; K05877 methyl-accepting chemotaxis protein IV, peptide sensor receptor                                                          | eci:EC55989_2064 |
| A0425_s_at       | -1.289034515 | 0.038075711  | Decrease_in_adherent yfeC; hypothetical protein                                                                                                                                         | sdv:SDY_2596     |
| V3565_s_at       | -1.287184317 | 0.044534512  | Decrease_in_adherent lipoprotein ; K07287 lipoprotein-34                                                                                                                                | cko:CKO_00310    |
| V4999_s_at       | -1.278108993 | 0.005619417  | Decrease_in_adherent gpsA; NAD(P)H-dependent glycerol-3-phosphate dehydrogenase (EC:1.1.1.94); K00057 glycerol-3-phosphate dehydrogenase (NAD(P)+) [EC:1.1.1.94]                        | sdv:SDY_4041     |
| EC869_5075_s_at  | -1.276111271 | 0.022987137  | Decrease_in_adherent ybgF; tol-pal system protein YbgF                                                                                                                                  | sdv:SDY_0690     |
| A1830_s_at       | -1.274969161 | 0.030880942  | Decrease_in_adherent rpmB; 50S ribosomal protein L28 ; K02902 large subunit ribosomal protein L28                                                                                       | kpu:KP1_5329     |
| V0699_s_at       | -1.274175671 | 0.003017889  | Decrease_in_adherent odd; cytidine deaminase (EC:3.5.4.5); K01489 cytidine deaminase [EC:3.5.4.5]                                                                                       | sdv:SDY_2144     |
| A3567_s_at       | -1.272593596 | 0.024739197  | Decrease_in_adherent loaA; outer-membrane lipoprotein carrier protein ; K03634 outer membrane lipoproteins carrier protein                                                              | sdv:SDY_2370     |
| SD1_2877_s_at    | -1.270011878 | 2.99E-05     | Decrease_in_adherent ndh; NADH dehydrogenase ; K03885 NADH dehydrogenase [EC:1.6.99.3]                                                                                                  | efl:LF82_1473    |
| A2005_x_at       | -1.269957705 | 0.006571728  | Decrease_in_adherent cyaY; frataxin-like protein ; K06202 CyaY protein                                                                                                                  | sdv:SDY_3938     |

|                  |              |             |                                                                                                                                                                                                   |                       |
|------------------|--------------|-------------|---------------------------------------------------------------------------------------------------------------------------------------------------------------------------------------------------|-----------------------|
| A1483_s_at       | -1.266537953 | 0.048495492 | Decrease_in_adherent rpsM; 30S ribosomal protein S13 ; K02952 small subunit ribosomal protein S13                                                                                                 | sdv:SDY_3474          |
| V2172_s_at       | -1.266170259 | 0.037382652 | Decrease_in_adherent NO_KEGG_DATA                                                                                                                                                                 | NO_KEGG_DATA          |
| A1502_s_at       | -1.266108751 | 0.038820682 | Decrease_in_adherent rplD; 50S ribosomal protein L4 ; K02926 large subunit ribosomal protein L4                                                                                                   | cko:CKO_04737         |
| LH0104_s_at      | -1.26564423  | 0.009265475 | Decrease_in_adherent hypothetical protein                                                                                                                                                         | ssn:SSON_2657         |
| A2762_s_at       | -1.257837263 | 0.038059153 | Decrease_in_adherent acnB; bifunctional aconitate hydratase 2/2-methylisocitrate dehydratase (EC:4.2.1.3) ; K01682 aconitate hydratase 2 [EC:4.2.1.3]                                             | ecv:APECO1_1867       |
| A2012_s_at       | -1.244440644 | 0.047570622 | Decrease_in_adherent dapF; diaminopimelate epimerase ; K01778 diaminopimelate epimerase [EC:5.1.1.7]                                                                                              | cko:CKO_00151         |
| V3621_s_at       | -1.243691155 | 0.030401882 | Decrease_in_adherent purM; phosphoribosylaminoimidazole synthetase (EC:6.3.3.1) ; K01933 phosphoribosylformylglycinamide cyclo-ligase [EC:6.3.3.1]                                                | sdv:SDY_2688          |
| V5728_s_at       | -1.24293349  | 0.00322537  | Decrease_in_adherent ybhQ; cardiolipin synthase 2 ; K06132 putative cardiolipin synthase [EC:2.7.8.-]                                                                                             | ssn:SSON_0768         |
| V1348_s_at       | -1.240402883 | 0.000157893 | Decrease_in_adherent NO_KEGG_DATA                                                                                                                                                                 | NO_KEGG_DATA          |
| A0075_s_at       | -1.24031424  | 0.030839293 | Decrease_in_adherent rfdD; dTDP-4-dehydrodihydroxymose reductase (EC:1.1.1.133) ; K00067 dTDP-4-dehydrodihydroxymose reductase [EC:1.1.1.133]                                                     | sdv:SDY_2205          |
| V6893_s_at       | -1.239795762 | 0.00927362  | Decrease_in_adherent proline aminopeptidase P II ; K01262 X-Pro aminopeptidase [EC:3.4.11.9]                                                                                                      | spe:Spro_3919         |
| A2812_s_at       | -1.235755121 | 0.016728941 | Decrease_in_adherent dapD; 2,3,4,5-tetrahydropyridine-2,6-carboxylate N-succinyltransferase (EC:2.3.1.117) ; K00674 2,3,4,5-tetrahydropyridine-2-carboxylate N-succinyltransferase [EC:2.3.1.117] | ssn:SSON_0178         |
| V4018_s_at       | -1.235716075 | 0.000910819 | Decrease_in_adherent aceE; pyruvate dehydrogenase subunit E1 ; K00163 pyruvate dehydrogenase E1 component [EC:1.2.4.1]                                                                            | sdv:SDY_0144          |
| V2140_s_at       | -1.23439664  | 0.026424179 | Decrease_in_adherent glnE; fused deadenylyltransferase/adenylyltransferase for glutamine synthetase (EC:2.7.7.42) ; K00982 glutamate-ammonia-ligase adenylyltransferase [EC:2.7.7.42]             | ebr:ECB_02923         |
| A2419_s_at       | -1.233505856 | 0.024756835 | Decrease_in_adherent ribosomal protein S18 ; K02963 small subunit ribosomal protein S18                                                                                                           | dze:Dd1591_0776       |
| S3755_s_at       | -1.232185082 | 0.00979944  | Decrease_in_adherent cpxP; periplasmic repressor CpxP ; K06006 periplasmic protein CpxP                                                                                                           | sdv:SDY_3833          |
| SF0983_s_at      | -1.228504688 | 0.001380453 | Decrease_in_adherent yccK; cryptic autophosphorylating protein tyrosine kinase Etk; K00903 protein-tyrosine kinase [EC:2.7.10.-]                                                                  | svf:SFV_0990          |
| EC869_5429_x_at  | -1.227827603 | 0.001898147 | Decrease_in_adherent gltB; glutamate synthase subunit alpha (EC:1.4.7.1) ; K00265 glutamate synthase (NADPH/NADH) large chain [EC:1.4.1.13 1.4.1.14]                                              | spe:Spro_4344         |
| A0426_s_at       | -1.227353622 | 0.018615751 | Decrease_in_adherent hypothetical protein                                                                                                                                                         | sko:SbBS512_E2780     |
| A2277_s_at       | -1.226740079 | 0.004625819 | Decrease_in_adherent soxS; DNA-binding transcriptional regulator SoxS                                                                                                                             | sbk:SbBS512_E4580     |
| pCoo054_at       | -1.225311047 | 0.001701831 | Decrease_in_adherent EAL domain-containing protein                                                                                                                                                | ecw:EcE24377A_E0053   |
| V4379_s_at       | -1.221016158 | 0.006201903 | Decrease_in_adherent serC; phosphoserine aminotransferase (EC:2.6.1.52) ; K00831 phosphoserine aminotransferase [EC:2.6.1.52]                                                                     | sdv:SDY_2354          |
| V5274_s_at       | -1.220174611 | 0.017042977 | Decrease_in_adherent hypothetical protein                                                                                                                                                         | ecy:ECSE_3781         |
| EC869_8838_s_at  | -1.219412421 | 0.001321564 | Decrease_in_adherent gltX; glutamyl-tRNA synthetase (EC:6.1.1.17) ; K01885 glutamyl-tRNA synthetase [EC:6.1.1.17]                                                                                 | sdv:SDY_2600          |
| A3348_s_at       | -1.218449509 | 0.007152863 | Decrease_in_adherent putative carboxylase                                                                                                                                                         | ecy:ECSE_0771         |
| EC869_8932_s_at  | -1.217801171 | 1.50E-05    | Decrease_in_adherent yihA; GTP-binding protein; K03978 GTP-binding protein                                                                                                                        | etw:ECSP_4917         |
| c3479_s_at       | -1.212392537 | 0.015891651 | Decrease_in_adherent ygfZ; tRNA-modifying protein YgfZ ; K06980                                                                                                                                   | efl:LF82_3181         |
| V3098_s_at       | -1.207095442 | 0.027877656 | Decrease_in_adherent folC; bifunctional folypolyglutamate synthase/dihydrofolate synthase ; K11754 dihydrofolate synthase / folypolyglutamate synthase [EC:6.3.2.12 6.3.2.17]                     | sdv:SDY_2514          |
| EC536_3670_s_at  | -1.202731057 | 0.006785392 | Decrease_in_adherent ynfJ; F0F1 ATP synthase subunit gamma (EC:3.6.3.14) ; K02115 F-type H+-transporting ATPase subunit gamma [EC:3.6.3.14]                                                       | sdv:SDY_4015          |
| V3992_s_at       | -1.201626798 | 0.009137986 | Decrease_in_adherent trpD; bifunctional glutamine amidotransferase/anthranilate phosphoribosyltransferase (EC:4.1.1.48 2.4.2.18) ; K00766 anthranilate phosphoribosyltransferase [EC:2.4.2.18]    | sdv:SDY_1331          |
| V1968_s_at       | -1.198305789 | 0.004807236 | Decrease_in_adherent yraO; DnaA initiator-associating protein DiaA ; K12961 DnaA initiator-associating protein                                                                                    | sdv:SDY_3328          |
| F0177_s_at       | -1.196157086 | 0.006704544 | Decrease_in_adherent map; methionine aminopeptidase (EC:3.4.11.18) ; K01265 methionyl aminopeptidase [EC:3.4.11.18]                                                                               | sdv:SDY_0184          |
| A2731_s_at       | -1.192647391 | 0.03145615  | Decrease_in_adherent NO_KEGG_DATA                                                                                                                                                                 | NO_KEGG_DATA          |
| D4754_at         | -1.190980951 | 0.016605047 | Decrease_in_adherent eltA; heat-labile enterotoxin A ; K10928 cholera enterotoxin subunit A [EC:2.4.2.36]                                                                                         | ecw:EcE24377A_F0200   |
| ECP_3142_s_at    | -1.190335155 | 2.95E-06    | Decrease_in_adherent glnE; bifunctional glutamine-synthetase adenylyltransferase/deadenyltransferase (EC:2.7.7.42) ; K00982 glutamate-ammonia-ligase adenylyltransferase [EC:2.7.7.42]            | ecm:ECMS35_3345       |
| SD1_2241_s_at    | -1.18889751  | 0.046653711 | Decrease_in_adherent accD; acetyl-CoA carboxylase subunit beta (EC:6.4.1.2) ; K01963 acetyl-CoA carboxylase carboxyl transferase subunit beta [EC:6.4.1.2]                                        | efe:EFER_0847         |
| M3184_s_at       | -1.184283739 | 0.01143769  | Decrease_in_adherent gloA; glyoxalase I (EC:4.4.1.5) ; K01759 lactoylglutathione lyase [EC:4.4.1.5]                                                                                               | sdv:SDY_1877          |
| A3128_s_at       | -1.184105354 | 0.008183777 | Decrease_in_adherent hypothetical protein                                                                                                                                                         | ecw:EcE24377A_0508    |
| V6095_s_at       | -1.181472555 | 0.010079964 | Decrease_in_adherent hemB; delta-aminolevulinic acid dehydratase (EC:4.2.1.24) ; K01698 porphobilinogen synthase [EC:4.2.1.24]                                                                    | sdv:SDY_0501          |
| V4772_s_at       | -1.179706204 | 0.024580595 | Decrease_in_adherent hypothetical protein                                                                                                                                                         | ecc:c4661             |
| EC869_2594_s_at  | -1.176373753 | 0.04202338  | Decrease_in_adherent tap; methyl-accepting protein IV ; K05877 methyl-accepting chemotaxis protein IV, peptide sensor receptor                                                                    | sbk:SbBS512_E2178     |
| V4146_s_at       | -1.175757998 | 0.049824802 | Decrease_in_adherent atpG; pyridoxine 5'-phosphate synthase ; K03474 pyridoxine 5-phosphate synthase [EC:2.6.99.2]                                                                                | sdv:SDY_2805          |
| A4706_s_at       | -1.175649191 | 0.001084471 | Decrease_in_adherent cheW; purine-binding chemotaxis protein ; K03408 purine-binding chemotaxis protein CheW                                                                                      | ssn:SSON_1230         |
| L1795_s_at       | -1.174698994 | 0.033124164 | Decrease_in_adherent hypothetical protein                                                                                                                                                         | sbk:SbBS512_E3978     |
| ECs2438_s_at     | -1.158262929 | 0.038440527 | Decrease_in_adherent katE; hydroperoxidase II (EC:1.11.1.6) ; K03781 catalase [EC:1.11.1.6]                                                                                                       | ssn:SSON_1426         |
| SD1_3011_s_at    | -1.14985724  | 0.004130394 | Decrease_in_adherent valS; valyl-tRNA synthetase (EC:6.1.1.9) ; K01873 valyl-tRNA synthetase [EC:6.1.1.9]                                                                                         | sdv:SDY_4282          |
| SSO_3777_s_at    | -1.149655133 | 0.003579688 | Decrease_in_adherent waaP; putative LPS biosynthesis enzyme ; K02848 heptose (I) phosphotransferase [EC:2.7.1.-]                                                                                  | sdv:SDY_4060          |
| A1670_s_at       | -1.147302178 | 0.034678732 | Decrease_in_adherent pyridine nucleotide-disulfide oxidoreductase family protein ; K07007                                                                                                         | sbk:SbBS512_E3830     |
| A0521_s_at       | -1.142859492 | 0.001667926 | Decrease_in_adherent purM; phosphoribosylaminoimidazole synthetase (EC:6.3.3.1) ; K01933 phosphoribosylformylglycinamide cyclo-ligase [EC:6.3.3.1]                                                | sfz:S2692             |
| EC869_1425_s_at  | -1.139709873 | 0.037882686 | Decrease_in_adherent ileS; isoleucyl-tRNA synthetase ; K01870 isoleucyl-tRNA synthetase [EC:6.1.1.5]                                                                                              | etw:ECSP_0027         |
| A3821_s_at       | -1.129238706 | 0.041689874 | Decrease_in_adherent ycfL; hypothetical protein                                                                                                                                                   | ssn:SSON_1124         |
| V5768_s_at       | -1.127503983 | 0.00163158  | Decrease_in_adherent ppc; phosphoenolpyruvate carboxylase (EC:4.1.1.31) ; K01595 phosphoenolpyruvate carboxylase [EC:4.1.1.31]                                                                    | sdv:SDY_3791          |
| V7305_s_at       | -1.126382572 | 0.027733243 | Decrease_in_adherent ycfQ; hypothetical protein                                                                                                                                                   | sdv:SDY_2039          |
| SD1_1241_s_at    | -1.125200375 | 0.002482889 | Decrease_in_adherent dapA; dihydrodipicolinate synthase (EC:4.2.1.52) ; K01714 dihydrodipicolinate synthase [EC:4.2.1.52]                                                                         | sbk:SbBS512_E2850     |
| EC869_4505_s_at  | -1.123788959 | 0.02349134  | Decrease_in_adherent gpsA; NAD(P)H-dependent glycerol-3-phosphate dehydrogenase (EC:1.1.1.94) ; K00057 glycerol-3-phosphate dehydrogenase (NAD(P)+) [EC:1.1.1.94]                                 | sdv:SDY_4041          |
| V6221_s_at       | -1.113975903 | 0.036602418 | Decrease_in_adherent sfcA; malate dehydrogenase (EC:1.1.1.38) ; K00027 malate dehydrogenase (oxaloacetate-decarboxylating) [EC:1.1.1.38]                                                          | sbk:SbBS512_E1742     |
| V5243_s_at       | -1.107345451 | 0.044757195 | Decrease_in_adherent putative ribonuclease ; K07058                                                                                                                                               | sbk:SbBS512_E3927     |
| J2890_s_at       | -1.106794638 | 0.043520429 | Decrease_in_adherent NO_KEGG_DATA                                                                                                                                                                 | NO_KEGG_DATA          |
| SFV_4186_s_at    | -1.09285492  | 0.004952808 | Decrease_in_adherent NO_KEGG_DATA                                                                                                                                                                 | NO_KEGG_DATA          |
| ECs4628_s_at     | -1.092842741 | 0.014910755 | Decrease_in_adherent hypothetical protein                                                                                                                                                         | sbk:SbBS512_E4231     |
| A4379_s_at       | -1.073183017 | 0.039722084 | Decrease_in_adherent hypothetical protein                                                                                                                                                         | svf:SFV_1561          |
| V2732_s_at       | -1.071647334 | 0.005376436 | Decrease_in_adherent glcB; malate synthase G ; K01638 malate synthase [EC:2.3.3.9]                                                                                                                | eqj:EC026_4076        |
| EC869_8661_s_at  | -1.071215154 | 0.002807762 | Decrease_in_adherent mutY; adenine DNA glycosylase ; K03575 A/G-specific adenine glycosylase [EC:3.2.2.-]                                                                                         | sdv:SDY_3111          |
| c4182_s_at       | -1.069136084 | 0.002660764 | Decrease_in_adherent hypothetical protein                                                                                                                                                         | eci:UTI89_C3906       |
| b1888_s_at       | -1.062311544 | 0.010994281 | Decrease_in_adherent CheA signal transduction histidine kinase ; K03407 two-component system, chemotaxis family, sensor kinase CheA [EC:2.7.13.3]                                                 | ebd:ECBD_1750         |
| EC869_6920_x_at  | -1.061030752 | 0.047938789 | Decrease_in_adherent hisD; histidinol dehydrogenase (EC:1.1.1.23) ; K00013 histidinol dehydrogenase [EC:1.1.1.23]                                                                                 | sdv:SDY_2221          |
| c5616_s_at       | -1.056611508 | 0.002523634 | Decrease_in_adherent cell-wall-associated hydrolase                                                                                                                                               | bnj:BMULJ_05090       |
| A0054_s_at       | -1.054719384 | 0.004737493 | Decrease_in_adherent hisG; ATP phosphoribosyltransferase (EC:2.4.2.17) ; K00765 ATP phosphoribosyltransferase [EC:2.4.2.17]                                                                       | sbk:SbBS512_E1213     |
| A1943_s_at       | -1.049828382 | 0.003888365 | Decrease_in_adherent F0F1 ATP synthase subunit C ; K02110 F-type H+-transporting ATPase subunit C [EC:3.6.3.14]                                                                                   | cko:CKO_00077         |
| A1366_s_at       | -1.049193552 | 0.003364984 | Decrease_in_adherent rpsO; 30S ribosomal protein S15 ; K02956 small subunit ribosomal protein S15                                                                                                 | sdv:SDY_3344          |
| V4694_s_at       | -1.048021915 | 0.045914199 | Decrease_in_adherent wecF; putative common antigen polymerase ; K02853 4-alpha-L-fucosyltransferase [EC:2.4.1.-]                                                                                  | sdv:SDY_3954          |
| EC869_0326_s_at  | -1.046209808 | 0.048565499 | Decrease_in_adherent envZ; osmolarity sensor protein; K07638 two-component system, OmpR family, osmolarity sensor histidine kinase EnvZ [EC:2.7.13.3]                                             | etr:ETA_E_3278        |
| c4454_s_at       | -1.045579005 | 0.037909991 | Decrease_in_adherent waaP; putative LPS biosynthesis enzyme ; K02848 heptose (I) phosphotransferase [EC:2.7.1.-]                                                                                  | sdv:SDY_4060          |
| AFFX-18srRnac_at | -1.044832375 | 0.048021148 | Decrease_in_adherent SORBIIDRAFT_1180s002020; hypothetical protein                                                                                                                                | sbi:SORBI_1180s002020 |

|               |              |             |                                                                                                                                                                   |               |
|---------------|--------------|-------------|-------------------------------------------------------------------------------------------------------------------------------------------------------------------|---------------|
| S1440_x_at    | -1.036189081 | 0.004300838 | Decrease_in_adherent NO_KEGG_DATA                                                                                                                                 | NO_KEGG_DATA  |
| V4048_s_at    | -1.033956136 | 0.033841079 | Decrease_in_adherent panD; aspartate alpha-decarboxylase (EC:4.1.1.11); K01579 aspartate 1-decarboxylase [EC:4.1.1.11]                                            | sdY:SDY_0041  |
| V4930_s_at    | -1.012955618 | 0.011934188 | Decrease_in_adherent yicE; putative transport protein                                                                                                             | ssn:SSON_3751 |
| SB5_0656_s_at | -1.006461186 | 0.037737665 | Decrease_in_adherent phnA; hypothetical protein ; K06193 phosphonoacetate hydrolase [EC:3.11.1.2]                                                                 | sdY:SDY_4109  |
| V6732_s_at    | -1.006087327 | 0.00541329  | Decrease_in_adherent murD; UDP-N-acetylmuramoyl-L-alanyl-D-glutamate synthetase (EC:6.3.2.9); K01925 UDP-N-acetylmuramoylalanine--D-glutamate ligase [EC:6.3.2.9] | sdY:SDY_0118  |
| V3104_s_at    | -1.003712382 | 0.010162377 | Decrease_in_adherent cvpA; colicin V production protein ; K03558 membrane protein required for colicin V production                                               | sdY:SDY_2512  |
| A3607_s_at    | -1.000125606 | 0.000710167 | Decrease_in_adherent ihfB; integration host factor subunit beta ; K05788 integration host factor subunit beta                                                     | sdY:SDY_2346  |
