# Supplementary material
Source: PubMed Central journal article supplement (PMC3536156)
Supplement: IAI.00919-12_zii999099955so2.pdf [file IAI.00919-12_zii999099955so2.pdf]

Supplemental Table 3: Gene changes at 120 minutes in adherent versus non-adherent samples

| Affy_ID          | Fold change | p-value     | Realtime change      | Annotation                                                                                                                                                       |
|------------------|-------------|-------------|----------------------|------------------------------------------------------------------------------------------------------------------------------------------------------------------|
| SFV_4382_at      | 4.281338468 | 0.0008003   | Increase_in_Adherent | NO_KEGG_DATA                                                                                                                                                     |
| b4060_s_at       | 3.34002235  | 0.019884584 | Increase_in_Adherent | yjcB; hypothetical protein                                                                                                                                       |
| V5655_s_at       | 3.106882837 | 0.003885457 | Increase_in_Adherent | putative nucleotide di-P-sugar epimerase or dehydratase                                                                                                          |
| A1454_s_at       | 3.094716282 | 0.003135214 | Increase_in_Adherent | DNA-binding protein fis; K03557 Fis family transcriptional regulator, factor for inversion stimulation protein                                                   |
| V4066_s_at       | 3.083852319 | 0.004623869 | Increase_in_Adherent | inositol monophosphatase ; K01092 myo-inositol-1(or 4)-monophosphatase [EC:3.1.3.25]                                                                             |
| ECP_0988_at      | 2.836800974 | 0.015013593 | Increase_in_Adherent | putative cold-shock protein (fragment)                                                                                                                           |
| V2984_s_at       | 2.65886023  | 0.0149772   | Increase_in_Adherent | lipid A biosynthesis palmitoleoyl acyltransferase ; K12974 palmitoleoyl transferase [EC:2.3.1.-]                                                                 |
| V2042_x_at       | 2.656818213 | 0.001285575 | Increase_in_Adherent | yqjG; putative transferase ; K07393 putative glutathione S-transferase                                                                                           |
| A3703_s_at       | 2.425885705 | 0.023131263 | Increase_in_Adherent | cold shock protein CspG ; K03704 cold shock protein (beta-ribbon, CspA family)                                                                                   |
| EC869_5515_s_at  | 2.411558731 | 0.023813448 | Increase_in_Adherent | yhdG; tRNA-dihydrouridine synthase B ; K05540 tRNA-dihydrouridine synthase B [EC:1.-.-.-]                                                                        |
| A4345_s_at       | 2.377010978 | 0.037557797 | Increase_in_Adherent | ydfK; conserved hypothetical protein; putative DNA-binding transcriptional regulator; Qin prophage                                                               |
| SS5_4206_s_at    | 2.360753464 | 0.028373914 | Increase_in_Adherent | NO_KEGG_DATA                                                                                                                                                     |
| A1975_s_at       | 2.33331025  | 0.006707275 | Increase_in_Adherent | hypothetical protein                                                                                                                                             |
| O2R_70_s_at      | 2.325892147 | 0.032336955 | Increase_in_Adherent | hypothetical protein                                                                                                                                             |
| J0200_x_at       | 2.307657402 | 0.008657105 | Increase_in_Adherent | rtcA; RNA 3'-terminal phosphate cyclase RtcA; K01974 RNA 3'-terminal phosphate cyclase [EC:6.5.1.4]                                                              |
| b4557_s_at       | 2.307163088 | 0.01576679  | Increase_in_Adherent | hypothetical protein ; K08998 hypothetical protein                                                                                                               |
| SD1_0959_s_at    | 2.254771973 | 0.002074655 | Increase_in_Adherent | marA; DNA-binding transcriptional activator MarA                                                                                                                 |
| ECP_3905_s_at    | 2.133659552 | 0.019980177 | Increase_in_Adherent | rpmA; ribonuclease P (EC:3.1.26.5); K03536 ribonuclease P protein component [EC:3.1.26.5]                                                                        |
| ECP_3903_s_at    | 2.08293317  | 0.023840985 | Increase_in_Adherent | dnaA; chromosomal replication initiation protein ; K02313 chromosomal replication initiator protein                                                              |
| ECP_3198_s_at    | 2.034610493 | 0.017096999 | Increase_in_Adherent | NO_KEGG_DATA                                                                                                                                                     |
| pCoo002_at       | 1.998140063 | 0.038801161 | Increase_in_Adherent | NO_KEGG_DATA                                                                                                                                                     |
| M4325_x_at       | 1.953664376 | 0.047218227 | Increase_in_Adherent | transposase (IS4 family)                                                                                                                                         |
| F2357_s_at       | 1.947895253 | 0.0467456   | Increase_in_Adherent | hypothetical protein                                                                                                                                             |
| EC869_2283_s_at  | 1.936063249 | 0.014002833 | Increase_in_Adherent | metH; B12-dependent methionine synthase ; K00548 5-methyltetrahydrofolate--homocysteine methyltransferase [EC:2.1.1.13]                                          |
| EC869_8015_x_at  | 1.906386087 | 0.008057988 | Increase_in_Adherent | hcaA1; large terminal subunit of phenylpropionate dioxygenase ; K05708 large terminal subunit of phenylpropionate dioxygenase [EC:1.14.12.19]                    |
| M0299_x_at       | 1.855239406 | 0.044139114 | Increase_in_Adherent | hypothetical protein ; K07090                                                                                                                                    |
| ECP_3250_s_at    | 1.673332162 | 0.027457807 | Increase_in_Adherent | deaD; ATP-dependent RNA helicase DeaD (EC:3.6.1.-); K05592 ATP-dependent RNA helicase DeaD                                                                       |
| A4355_s_at       | 1.635988557 | 0.045519544 | Increase_in_Adherent | csxB; cold shock-like protein CspB ; K03704 cold shock protein (beta-ribbon, CspA family)                                                                        |
| U1189_C2981_s_at | 1.627748393 | 0.001901677 | Increase_in_Adherent | NO_KEGG_DATA                                                                                                                                                     |
| A1371_s_at       | 1.592477902 | 0.035245524 | Increase_in_Adherent | yhbC; hypothetical protein ; K09748 hypothetical protein                                                                                                         |
| S0305_s_at       | 1.545296461 | 0.017933593 | Increase_in_Adherent | prfH; peptide chain release factor-like protein ; K02839 peptide chain release factor RF-H                                                                       |
| F4344_s_at       | 1.529460198 | 0.005696783 | Increase_in_Adherent | glnL; nitrogen regulation protein NR(II) ; K07708 two-component system, NtrC family, nitrogen regulation sensor histidine kinase GlnL [EC:2.7.13.3]              |
| D1393_s_at       | 1.500022364 | 0.04974378  | Increase_in_Adherent | repZ; replication initiation protein                                                                                                                             |
| A1254_s_at       | 1.49538928  | 0.024648497 | Increase_in_Adherent | ribosomal protein S21 ; K02970 small subunit ribosomal protein S21                                                                                               |
| EC869_5327_s_at  | 1.487509441 | 0.03189865  | Increase_in_Adherent | NO_KEGG_DATA                                                                                                                                                     |
| A2072_s_at       | 1.453360002 | 0.007835983 | Increase_in_Adherent | NO_KEGG_DATA                                                                                                                                                     |
| A0552_s_at       | 1.438370195 | 0.003602548 | Increase_in_Adherent | hscB; co-chaperone HscB ; K04082 molecular chaperone HscB                                                                                                        |
| A2648_s_at       | 1.432491724 | 0.03446818  | Increase_in_Adherent | NO_KEGG_DATA                                                                                                                                                     |
| c3926_s_at       | 1.418281213 | 0.036698109 | Increase_in_Adherent | nusA; transcription elongation factor NusA ; K02600 N utilization substance protein A                                                                            |
| V1799_s_at       | 1.41318667  | 0.022256415 | Increase_in_Adherent | hscB; co-chaperone HscB ; K04082 molecular chaperone HscB                                                                                                        |
| N1756_at         | 1.34816672  | 0.008914024 | Increase_in_Adherent | NO_KEGG_DATA                                                                                                                                                     |
| A4072_x_at       | 1.343495624 | 0.01524488  | Increase_in_Adherent | translation initiation factor SUI1 ; K03113 translation initiation factor SUI1                                                                                   |
| EC869_5325_x_at  | 1.336193259 | 0.019037522 | Increase_in_Adherent | ATP-dependent RNA helicase DeaD ; K05592 ATP-dependent RNA helicase DeaD                                                                                         |
| V1929_s_at       | 1.310847498 | 0.029853489 | Increase_in_Adherent | infB; translation initiation factor IF-2 ; K02519 translation initiation factor IF-2                                                                             |
| A1908_s_at       | 1.288295674 | 0.007204921 | Increase_in_Adherent | putative inner membrane protein translocase component YidC ; K03217 preprotein translocase subunit YidC                                                          |
| N4402_at         | 1.274470382 | 0.01638995  | Increase_in_Adherent | NO_KEGG_DATA                                                                                                                                                     |
| S0022_s_at       | 1.260785397 | 0.003763512 | Increase_in_Adherent | hypothetical protein                                                                                                                                             |
| b0957_s_at       | 1.234910259 | 0.030328291 | Increase_in_Adherent | NO_KEGG_DATA                                                                                                                                                     |
| D4792_s_at       | 1.218090262 | 0.012597833 | Increase_in_Adherent | hypothetical protein                                                                                                                                             |
| A3559_s_at       | 1.216475484 | 0.025305867 | Increase_in_Adherent | infA; translation initiation factor IF-1 ; K02518 translation initiation factor IF-1                                                                             |
| Z2553_s_at       | 1.211283961 | 0.008201771 | Increase_in_Adherent | yciG; hypothetical protein; K06884                                                                                                                               |
| A2856_s_at       | 1.200826167 | 0.01964287  | Increase_in_Adherent | mltD; membrane-bound lytic murein transglycosylase D ; K08307 membrane-bound lytic murein transglycosylase D [EC:3.2.1.-]                                        |
| EC869_8379_x_at  | 1.186421644 | 0.008559054 | Increase_in_Adherent | asfE; succinylglutamate desuccinylase ; K05526 succinylglutamate desuccinylase [EC:3.5.1.96]                                                                     |
| pWR501_p270_at   | 1.18383917  | 0.02755224  | Increase_in_Adherent | transcriptional regulator MerD                                                                                                                                   |
| ECs4791_s_at     | 1.183116634 | 0.014957484 | Increase_in_Adherent | glnL; nitrogen regulation protein NR(II) (EC:2.7.13.3); K07708 two-component system, NtrC family, nitrogen regulation sensor histidine kinase GlnL [EC:2.7.13.3] |
| SDY_2842_s_at    | 1.181690701 | 0.030398508 | Increase_in_Adherent | IS600 ORF2                                                                                                                                                       |
| b3350_s_at       | 1.157599308 | 0.015615069 | Increase_in_Adherent | NO_KEGG_DATA                                                                                                                                                     |
| V1014_s_at       | 1.14591187  | 0.028708239 | Increase_in_Adherent | mnmA; tRNA-specific 2-thiouridylase MnmA (EC:2.1.1.61); K00566 tRNA (5-methylaminomethyl-2-thiouridylate)-methyltransferase [EC:2.1.1.61]                        |
| A1298_s_at       | 1.140294434 | 0.020531555 | Increase_in_Adherent | NO_KEGG_DATA                                                                                                                                                     |
| V2302_x_at       | 1.134823562 | 0.025980187 | Increase_in_Adherent | ribonucleotide-diphosphate reductase subunit alpha ; K00525 ribonucleoside-diphosphate reductase alpha chain [EC:1.17.4.1]                                       |
| V0550_s_at       | 1.110680567 | 0.043444694 | Increase_in_Adherent | yegH; UPF0053 protein YegH                                                                                                                                       |
| S3426_s_at       | 1.10796526  | 0.049834281 | Increase_in_Adherent | infB; translation initiation factor IF-2 ; K02519 translation initiation factor IF-2                                                                             |
| V1939_s_at       | 1.091340149 | 0.03435546  | Increase_in_Adherent | NO_KEGG_DATA                                                                                                                                                     |
| F0478_s_at       | 1.056681543 | 0.01627106  | Increase_in_Adherent | NO_KEGG_DATA                                                                                                                                                     |
| V0624_x_at       | 1.052312781 | 0.049038037 | Increase_in_Adherent | hypothetical protein ; K05521 ADP-ribosylglycohydrolase [EC:3.2.-.-]                                                                                             |

|                  |              |             |                      |                                                                                                                                                               |
|------------------|--------------|-------------|----------------------|---------------------------------------------------------------------------------------------------------------------------------------------------------------|
| SBO_0242_s_at    | 1.034935706  | 0.022792143 | Increase_in_Adherent | prfH; peptide chain release factor-like protein ; K02839 peptide chain release factor RF-H                                                                    |
| V3388_s_at       | -4.701720945 | 0.002718206 | Decrease_in_adherent | ppsA; phosphoenolpyruvate synthase (EC:2.7.9.2); K01007 pyruvate, water dikinase [EC:2.7.9.2]                                                                 |
| pCoo013_at       | -4.580214693 | 0.004253352 | Decrease_in_adherent | <b>CS1 type fimbrial major subunit</b>                                                                                                                        |
| V6213_s_at       | -4.57914751  | 0.001068757 | Decrease_in_adherent | OsmC family protein ; K04063 osmotically inducible protein OsmC                                                                                               |
| A3474_s_at       | -4.563446644 | 0.018908558 | Decrease_in_adherent | ybiI; hypothetical protein                                                                                                                                    |
| EC869_3421_s_at  | -4.493914525 | 0.000783394 | Decrease_in_adherent | dadA; D-amino acid dehydrogenase small subunit (EC:1.4.99.1); K00285 D-amino-acid dehydrogenase [EC:1.4.99.1]                                                 |
| SB5_2457_s_at    | -4.473359282 | 0.004951024 | Decrease_in_adherent | cstA; carbon starvation protein A ; K06200 carbon starvation protein                                                                                          |
| V3384_s_at       | -4.447056953 | 0.00369319  | Decrease_in_adherent | phosphoenolpyruvate synthase ; K01007 pyruvate, water dikinase [EC:2.7.9.2]                                                                                   |
| A2032_s_at       | -4.354893117 | 0.012397542 | Decrease_in_adherent | metE; 5-methyltetrahydropteroyltryglutamate--homocysteine S-methyltransferase (EC:2.1.1.14); K00549 5-methyltetrahydropteroyltryglutamate--homocysteine metE  |
| c1138_s_at       | -4.31136521  | 0.023181908 | Decrease_in_adherent | hypothetical protein                                                                                                                                          |
| V4294_s_at       | -4.236721133 | 0.00951363  | Decrease_in_adherent | NO_KEGG_DATA                                                                                                                                                  |
| EC869_0579_s_at  | -4.231889798 | 0.001248462 | Decrease_in_adherent | slp; outer membrane protein induced after carbon starvation ; K07285 outer membrane lipoprotein                                                               |
| SD1_2370_s_at    | -4.202660544 | 0.002988022 | Decrease_in_adherent | NO_KEGG_DATA                                                                                                                                                  |
| A0363_at         | -4.196611198 | 0.00636653  | Decrease_in_adherent | NO_KEGG_DATA                                                                                                                                                  |
| A3234_s_at       | -4.170853981 | 0.001584979 | Decrease_in_adherent | ybdD; hypothetical protein                                                                                                                                    |
| b4189_s_at       | -4.058533598 | 0.032157335 | Decrease_in_adherent | yjfO; hypothetical protein                                                                                                                                    |
| V4370_s_at       | -4.058225375 | 0.007049652 | Decrease_in_adherent | grxB; glutaredoxin 2 ; K03675 glutaredoxin 2                                                                                                                  |
| H3672_s_at       | -4.042458445 | 0.003503769 | Decrease_in_adherent | kbl; 2-amino-3-ketobutyrate coenzyme A ligase (EC:2.3.1.29); K00639 glycine C-acetyltransferase [EC:2.3.1.29]                                                 |
| SD1_0481_s_at    | -4.00234373  | 0.017971444 | Decrease_in_adherent | glpD; glycerol-3-phosphate dehydrogenase (EC:1.1.5.3); K00111 glycerol-3-phosphate dehydrogenase [EC:1.1.5.3]                                                 |
| A1237_s_at       | -3.998681111 | 0.023081567 | Decrease_in_adherent | glgS; glycogen synthesis protein GlgS                                                                                                                         |
| F4011_s_at       | -3.968918566 | 0.003251886 | Decrease_in_adherent | NO_KEGG_DATA                                                                                                                                                  |
| M2693_s_at       | -3.924023554 | 0.013768202 | Decrease_in_adherent | NO_KEGG_DATA                                                                                                                                                  |
| F3184_s_at       | -3.893332454 | 0.002282172 | Decrease_in_adherent | bgIA; 6-phospho-beta-glucosidase A, cryptic ; K01223 6-phospho-beta-glucosidase [EC:3.2.1.86]                                                                 |
| SD1_0444_s_at    | -3.870934172 | 0.026091508 | Decrease_in_adherent | NO_KEGG_DATA                                                                                                                                                  |
| APECO1_1866_s_at | -3.862145319 | 0.01702479  | Decrease_in_adherent | NO_KEGG_DATA                                                                                                                                                  |
| V5372_s_at       | -3.821470942 | 0.006471064 | Decrease_in_adherent | yhhA; hypothetical protein                                                                                                                                    |
| SB5_4158_s_at    | -3.792611294 | 0.022952944 | Decrease_in_adherent | phoH; hypothetical protein ; K06217 phosphate starvation-inducible protein PhoH and related proteins                                                          |
| LH0106_s_at      | -3.790584311 | 0.011122213 | Decrease_in_adherent | colicin-Ib immunity protein                                                                                                                                   |
| S3742_s_at       | -3.784370434 | 0.010503741 | Decrease_in_adherent | glpF; facilitated diffusion of glycerol ; K02440 glycerol uptake facilitator protein                                                                          |
| A1055_at         | -3.772273812 | 0.001608818 | Decrease_in_adherent | ATPase                                                                                                                                                        |
| V2562_s_at       | -3.752232274 | 0.000927498 | Decrease_in_adherent | gst; glutathionine S-transferase ; K00799 glutathione S-transferase [EC:2.5.1.18]                                                                             |
| V2522_s_at       | -3.7515213   | 0.012191069 | Decrease_in_adherent | fumA; fumarate hydratase (EC:4.2.1.2); K01676 fumarate hydratase, class I [EC:4.2.1.2]                                                                        |
| SD1_0883_s_at    | -3.744652436 | 0.000910817 | Decrease_in_adherent | yncE; hypothetical protein                                                                                                                                    |
| EC869_3291_s_at  | -3.741026488 | 0.030010999 | Decrease_in_adherent | NO_KEGG_DATA                                                                                                                                                  |
| EC869_3589_s_at  | -3.733412064 | 0.007217955 | Decrease_in_adherent | dps; DNA starvation/stationary phase protection protein Dps ; K04047 starvation-inducible DNA-binding protein                                                 |
| EC869_6087_s_at  | -3.728797    | 0.000153903 | Decrease_in_adherent | hypothetical protein ; K02782 PTS system, glucitol/sorbitol-specific IIB component [EC:2.7.1.69]; K02783 PTS system, glucitol/sorbitol-specific IIC component |
| N3879_s_at       | -3.684081442 | 0.003509522 | Decrease_in_adherent | qor; quinone oxidoreductase, NADPH-dependent ; K00344 NADPH2:quinone reductase [EC:1.6.5.5]                                                                   |
| SS5_4357_s_at    | -3.678645386 | 0.024059883 | Decrease_in_adherent | yciR; RNase II stability modulator                                                                                                                            |
| S1555_s_at       | -3.669256374 | 0.00469115  | Decrease_in_adherent | hypothetical protein ; K07180 serine protein kinase                                                                                                           |
| V5294_s_at       | -3.643545171 | 0.015599898 | Decrease_in_adherent | hypothetical protein ; K06149 universal stress protein A                                                                                                      |
| b2597_s_at       | -3.637237945 | 0.01512629  | Decrease_in_adherent | hypothetical protein                                                                                                                                          |
| V5800_at         | -3.623983909 | 0.004194855 | Decrease_in_adherent | yjE; hypothetical protein                                                                                                                                     |
| EC869_5122_x_at  | -3.605209206 | 0.028507213 | Decrease_in_adherent | entF; enterobactin synthase subunit F ; K02364 enterobactin synthetase component F [EC:2.7.7.-]                                                               |
| b3236_s_at       | -3.599104005 | 0.00435757  | Decrease_in_adherent | mdh; malate dehydrogenase (EC:1.1.1.37); K00026 malate dehydrogenase [EC:1.1.1.37]                                                                            |
| SS5_4345_s_at    | -3.591552128 | 0.001282208 | Decrease_in_adherent | aminobenzoyl-glutamate transport protein ; K12942 aminobenzoyl-glutamate transport protein                                                                    |
| V0058_s_at       | -3.579075765 | 0.01027263  | Decrease_in_adherent | aspA; aspartate ammonia-lyase (EC:4.3.1.1); K01744 aspartate ammonia-lyase [EC:4.3.1.1]                                                                       |
| F1479_s_at       | -3.562625992 | 0.000167821 | Decrease_in_adherent | NO_KEGG_DATA                                                                                                                                                  |
| M3390_at         | -3.475562611 | 0.000773807 | Decrease_in_adherent | NO_KEGG_DATA                                                                                                                                                  |
| A3230_s_at       | -3.473230028 | 0.004245687 | Decrease_in_adherent | entB; 2,3-dihydro-2,3-dihydroxybenzoate synthetase ; K01252 enterobactin isochorismatase [EC:3.3.2.1]                                                         |
| SDY_2364_s_at    | -3.462252571 | 0.000977874 | Decrease_in_adherent | hypothetical protein                                                                                                                                          |
| A2345_s_at       | -3.450251316 | 0.010466795 | Decrease_in_adherent | yjD; hypothetical protein ; K06975                                                                                                                            |
| A1575_s_at       | -3.448995139 | 0.002017461 | Decrease_in_adherent | pckA; phosphoenolpyruvate carboxykinase (EC:4.1.1.49); K01610 phosphoenolpyruvate carboxykinase (ATP) [EC:4.1.1.49]                                           |
| V3798_x_at       | -3.441278844 | 0.005625507 | Decrease_in_adherent | yahO; hypothetical protein                                                                                                                                    |
| b1603_s_at       | -3.430487673 | 0.001341321 | Decrease_in_adherent | pntA; NAD(P) transhydrogenase subunit alpha (EC:1.6.1.2); K00324 NAD(P) transhydrogenase subunit alpha [EC:1.6.1.2]                                           |
| V1952_s_at       | -3.429172707 | 0.006634199 | Decrease_in_adherent | yhbS; hypothetical protein ; K03824 putative acetyltransferase [EC:2.3.1.-]                                                                                   |
| V3949_s_at       | -3.427056034 | 0.018724818 | Decrease_in_adherent | narL; transcriptional regulator NarL ; K07684 two-component system, NarL family, nitrate/nitrite response regulator NarL                                      |
| EC869_4082_s_at  | -3.425818367 | 0.003391417 | Decrease_in_adherent | ompF; outer membrane protein F ; K09476 outer membrane pore protein F                                                                                         |
| SD1_0513_s_at    | -3.421478313 | 0.000945869 | Decrease_in_adherent | pckA; phosphoenolpyruvate carboxykinase (EC:4.1.1.49); K01610 phosphoenolpyruvate carboxykinase (ATP) [EC:4.1.1.49]                                           |
| H3052_s_at       | -3.41578339  | 0.016544496 | Decrease_in_adherent | NO_KEGG_DATA                                                                                                                                                  |
| A0215_s_at       | -3.407051158 | 0.015815582 | Decrease_in_adherent | yeiQ; putative dehydrogenase, NAD-dependent                                                                                                                   |
| ECP_2029_s_at    | -3.375450374 | 0.004575448 | Decrease_in_adherent | hypothetical protein                                                                                                                                          |
| A3388_s_at       | -3.371155783 | 0.011768587 | Decrease_in_adherent | gpmA; phosphoglyceromutase 1 ; K01834 phosphoglycerate mutase [EC:5.4.2.1]                                                                                    |
| EC869_0354_s_at  | -3.360958273 | 0.019110082 | Decrease_in_adherent | NO_KEGG_DATA                                                                                                                                                  |
| SB5_1096_s_at    | -3.356610758 | 0.032677729 | Decrease_in_adherent | gabD; succinate-semialdehyde dehydrogenase I ; K00135 succinate-semialdehyde dehydrogenase (NADP+) [EC:1.2.1.16]                                              |
| LH0125_s_at      | -3.356287504 | 0.027225614 | Decrease_in_adherent | NO_KEGG_DATA                                                                                                                                                  |
| A3718_s_at       | -3.317253056 | 0.035017118 | Decrease_in_adherent | yccJ; hypothetical protein                                                                                                                                    |

|                  |              |             |                                                                                                                                                                                    |
|------------------|--------------|-------------|------------------------------------------------------------------------------------------------------------------------------------------------------------------------------------|
| SD1_2813_s_at    | -3.315304505 | 0.001395327 | Decrease_in_adherent hchA; chaperone protein HchA ; K05523 molecular chaperone hchA (Hsp31)                                                                                        |
| V5011_s_at       | -3.315054091 | 0.007310337 | Decrease_in_adherent lldD; L-lactate dehydrogenase (EC:1.1.2.3); K00101 L-lactate dehydrogenase (cytochrome) [EC:1.1.2.3]                                                          |
| pCoo054_at       | -3.309772569 | 0.005254768 | Decrease_in_adherent EAL domain-containing protein                                                                                                                                 |
| A3367_s_at       | -3.306676764 | 0.000454788 | Decrease_in_adherent sucD; succinyl-CoA synthetase subunit alpha (EC:6.2.1.5); K01902 succinyl-CoA synthetase alpha subunit [EC:6.2.1.5]                                           |
| b0839_s_at       | -3.302918496 | 0.008728671 | Decrease_in_adherent dacC; D-alanyl-D-alanine carboxypeptidase fraction C (EC:3.4.16.4); K07258 D-alanyl-D-alanine carboxypeptidase (penicillin-binding protein 5/6) [EC:3.4.16.4] |
| F4391_s_at       | -3.301057408 | 0.012701424 | Decrease_in_adherent yjiM; hypothetical protein                                                                                                                                    |
| SD1_2994_s_at    | -3.296129299 | 0.014945161 | Decrease_in_adherent gmr; RNase II stability modulator                                                                                                                             |
| A2361_s_at       | -3.282204117 | 0.001612682 | Decrease_in_adherent groEL; chaperonin GroEL ; K04077 chaperonin GroEL                                                                                                             |
| A4534_s_at       | -3.281462864 | 0.01604509  | Decrease_in_adherent hypothetical protein                                                                                                                                          |
| pCoo074_at       | -3.262661478 | 0.026771216 | Decrease_in_adherent fimC; modulator of post-segregation killing protein                                                                                                           |
| EC869_7817_x_at  | -3.259838057 | 0.042987257 | Decrease_in_adherent fhuF; ferric iron reductase involved in ferric hydroxamate transport                                                                                          |
| SD1_3595_s_at    | -3.255931002 | 0.010592947 | Decrease_in_adherent gpmA; phosphoglyceromutase 1 ; K01834 phosphoglycerate mutase [EC:5.4.2.1]                                                                                    |
| V0723_s_at       | -3.254510361 | 0.017636831 | Decrease_in_adherent cirA; colicin I receptor ; K02014 iron complex outer membrane receptor protein                                                                                |
| EC869_5019_s_at  | -3.251192809 | 0.002917043 | Decrease_in_adherent gltA; type II citrate synthase (EC:2.3.3.1); K01647 citrate synthase [EC:2.3.3.1]                                                                             |
| A4532_s_at       | -3.242944201 | 0.00634244  | Decrease_in_adherent pfkB; 6-phosphofructokinase 2 (EC:2.7.1.11); K00850 6-phosphofructokinase [EC:2.7.1.11]                                                                       |
| A3285_s_at       | -3.239988938 | 0.016855754 | Decrease_in_adherent ybeL; hypothetical protein                                                                                                                                    |
| APECO1_2795_at   | -3.230709065 | 0.006314799 | Decrease_in_adherent hypothetical protein                                                                                                                                          |
| c1317_at         | -3.214098268 | 0.010356198 | Decrease_in_adherent NO_KEGG_DATA                                                                                                                                                  |
| D4048_at         | -3.209978297 | 0.001619612 | Decrease_in_adherent NO_KEGG_DATA                                                                                                                                                  |
| V5642_s_at       | -3.204442904 | 0.016086341 | Decrease_in_adherent bssR; biofilm formation regulatory protein BssR                                                                                                               |
| V4298_s_at       | -3.204150045 | 0.010807388 | Decrease_in_adherent TrpR binding protein WrbA ; K03809 Trp repressor binding protein                                                                                              |
| b1136_s_at       | -3.189372221 | 0.001992581 | Decrease_in_adherent hypothetical protein                                                                                                                                          |
| A1592_s_at       | -3.187079372 | 0.02901082  | Decrease_in_adherent transcriptional regulator MalT; K03556 LuxR family transcriptional regulator, maltose regulon positive regulatory protein                                     |
| A3558_s_at       | -3.182251081 | 0.005450524 | Decrease_in_adherent ctpA; ATP-dependent Ctp protease ATP-binding subunit ; K03694 ATP-dependent Ctp protease ATP-binding subunit CtpA                                             |
| A2210_s_at       | -3.174869482 | 0.003254162 | Decrease_in_adherent hupA; transcriptional regulator HU subunit alpha ; K05787 DNA-binding protein HU-alpha                                                                        |
| EC869_5018_s_at  | -3.170070731 | 0.002577603 | Decrease_in_adherent gltA; type II citrate synthase (EC:2.3.3.1); K01647 citrate synthase [EC:2.3.3.1]                                                                             |
| b3506_s_at       | -3.158245167 | 0.013266712 | Decrease_in_adherent slp; outer membrane lipoprotein ; K07285 outer membrane lipoprotein                                                                                           |
| V2453_s_at       | -3.150948028 | 0.038451322 | Decrease_in_adherent dhah; fused putative dihydroxyacetone-specific PTS enzymes: HPr component/EI component; K05881 PTS hybrid protein                                             |
| A3862_at         | -3.144557937 | 0.004134885 | Decrease_in_adherent hypothetical protein                                                                                                                                          |
| SDY_1914_s_at    | -3.144333854 | 0.001103838 | Decrease_in_adherent NO_KEGG_DATA                                                                                                                                                  |
| b3409_s_at       | -3.142263072 | 0.018822926 | Decrease_in_adherent feoB; ferrous iron transport protein B ; K04759 ferrous iron transport protein B                                                                              |
| A3132_s_at       | -3.140911771 | 0.008390153 | Decrease_in_adherent hemH; ferrochelatase (EC:4.99.1.1); K01772 ferrochelatase [EC:4.99.1.1]                                                                                       |
| EC869_4095_s_at  | -3.135298455 | 0.007205859 | Decrease_in_adherent NO_KEGG_DATA                                                                                                                                                  |
| c2932_s_at       | -3.134397752 | 0.00511918  | Decrease_in_adherent nupC; nucleoside permease NupC ; K11535 nucleoside transport protein                                                                                          |
| b4232_s_at       | -3.134098097 | 0.00467968  | Decrease_in_adherent fbp; fructose-1,6-bisphosphatase (EC:3.1.3.11); K03841 fructose-1,6-bisphosphatase I [EC:3.1.3.11]                                                            |
| V7379_s_at       | -3.127437577 | 0.003909375 | Decrease_in_adherent putative 5-methylcytosine-specific restriction enzyme with GTPase activity (EC:3.1.21.-)                                                                      |
| A1966_s_at       | -3.119484701 | 0.01957593  | Decrease_in_adherent yifE; hypothetical protein ; K09897 hypothetical protein                                                                                                      |
| ECs5510_s_at     | -3.117325396 | 0.005401674 | Decrease_in_adherent hypothetical protein                                                                                                                                          |
| EC869_4295_s_at  | -3.115501234 | 0.008984389 | Decrease_in_adherent glycine dehydrogenase ; K00282 glycine dehydrogenase subunit 1 [EC:1.4.4.2]; K00283 glycine dehydrogenase subunit 2 [EC:1.4.4.2]                              |
| b1508_s_at       | -3.114277945 | 0.021875302 | Decrease_in_adherent hipB; DNA-binding transcriptional regulator HipB                                                                                                              |
| A4196_s_at       | -3.113760196 | 0.005091909 | Decrease_in_adherent ydcH; hypothetical protein; K09794 hypothetical protein                                                                                                       |
| F3186_s_at       | -3.112769957 | 0.00138684  | Decrease_in_adherent gcvH; glycine cleavage system protein H ; K02437 glycine cleavage system H protein                                                                            |
| SS5_4613_s_at    | -3.104944662 | 0.003817665 | Decrease_in_adherent D-ribose transporter subunit RbsB ; K10439 ribose transport system substrate-binding protein                                                                  |
| EC869_8900_s_at  | -3.099128231 | 0.015699272 | Decrease_in_adherent hydrogenase 2 small subunit (EC:1.12.99.6); K06282 hydrogenase small subunit [EC:1.12.99.6]                                                                   |
| F3644_x_at       | -3.093997102 | 0.027477767 | Decrease_in_adherent hypothetical protein ; K03747 Smg protein                                                                                                                     |
| V6408_s_at       | -3.087848792 | 0.011313688 | Decrease_in_adherent hypothetical protein ; K12941 aminobenzoyl-glutamate utilization protein B                                                                                    |
| V3875_s_at       | -3.072376897 | 0.000115976 | Decrease_in_adherent sucC; succinyl-CoA synthetase subunit beta (EC:6.2.1.5); K01903 succinyl-CoA synthetase beta subunit [EC:6.2.1.5]                                             |
| SB5_0263_s_at    | -3.06883365  | 0.031875638 | Decrease_in_adherent yhiO; universal stress protein UspB ; K06144 universal stress protein B                                                                                       |
| UTI89_C2497_s_at | -3.044946403 | 0.009340129 | Decrease_in_adherent NO_KEGG_DATA                                                                                                                                                  |
| ECs2487_s_at     | -3.031691024 | 0.024681186 | Decrease_in_adherent yeaA; methionine sulfoxide reductase B (EC:1.8.4.11); K07305 peptide-methionine (R)-S-oxide reductase [EC:1.8.4.12]                                           |
| F0646_s_at       | -3.031091752 | 0.028811117 | Decrease_in_adherent NO_KEGG_DATA                                                                                                                                                  |
| SB5_2639_s_at    | -3.030410019 | 0.019999325 | Decrease_in_adherent hypothetical protein ; K07180 serine protein kinase                                                                                                           |
| pCoo055_at       | -3.016932017 | 0.020711381 | Decrease_in_adherent ydeO; HTH-type transcriptional regulator YdeO                                                                                                                 |
| SD1_2076_s_at    | -3.012512667 | 0.007386734 | Decrease_in_adherent mntH; manganese transport protein MntH ; K03322 manganese transport protein                                                                                   |
| A1089_at         | -3.011759942 | 0.014475753 | Decrease_in_adherent hypothetical protein                                                                                                                                          |
| b0865_s_at       | -3.009321665 | 0.007512663 | Decrease_in_adherent ybjP; putative lipoprotein                                                                                                                                    |
| W4348_at         | -3.008293995 | 0.011732632 | Decrease_in_adherent putative cytoplasmic protein                                                                                                                                  |
| SD1_3346_s_at    | -3.000515667 | 0.022151023 | Decrease_in_adherent ycbB; hypothetical protein                                                                                                                                    |
| b3024_s_at       | -2.994994173 | 0.026140462 | Decrease_in_adherent ygiW; hypothetical protein                                                                                                                                    |
| A1693_s_at       | -2.983530831 | 0.018291974 | Decrease_in_adherent hdeA; acid-resistance protein                                                                                                                                 |
| SF0956_s_at      | -2.983511375 | 0.010980582 | Decrease_in_adherent ycbG; hypothetical protein ; K09911 hypothetical protein                                                                                                      |
| SDY_3461_x_at    | -2.982342955 | 0.027051632 | Decrease_in_adherent hypothetical protein ; K03747 Smg protein                                                                                                                     |
| c4443_s_at       | -2.973461469 | 0.000502327 | Decrease_in_adherent tdh; L-threonine 3-dehydrogenase (EC:1.1.1.103); K00060 threonine 3-dehydrogenase [EC:1.1.1.103]                                                              |
| EC869_8327_s_at  | -2.971398331 | 0.01960952  | Decrease_in_adherent selenophosphate synthetase (EC:2.7.9.3); K01008 selenide, water dikinase [EC:2.7.9.3]                                                                         |
| c4045_x_at       | -2.96179608  | 0.021191116 | Decrease_in_adherent smg; hypothetical protein; K03747 Smg protein                                                                                                                 |
| V5243_s_at       | -2.959948112 | 0.006283166 | Decrease_in_adherent putative ribonuclease ; K07058                                                                                                                                |
| D3045_s_at       | -2.955793287 | 0.005588477 | Decrease_in_adherent NO_KEGG_DATA                                                                                                                                                  |

|                  |              |             |                                                                                                                                                                                        |
|------------------|--------------|-------------|----------------------------------------------------------------------------------------------------------------------------------------------------------------------------------------|
| A2446_s_at       | -2.952804419 | 0.01697969  | Decrease_in_adherent NO_KEGG_DATA                                                                                                                                                      |
| SD1_2927_s_at    | -2.952545792 | 0.021324303 | Decrease_in_adherent ydaA; universal stress protein UspE                                                                                                                               |
| c3976_s_at       | -2.948739645 | 0.022606095 | Decrease_in_adherent NO_KEGG_DATA                                                                                                                                                      |
| A3364_s_at       | -2.946555869 | 0.002238663 | Decrease_in_adherent sucA; 2-oxoglutarate dehydrogenase E1 component (EC:1.2.4.2); K00164 2-oxoglutarate dehydrogenase E1 component [EC:1.2.4.2]                                       |
| SD1_2417_s_at    | -2.934775227 | 0.011465897 | Decrease_in_adherent hydroxyglutarate oxidase                                                                                                                                          |
| A1218_s_at       | -2.934754464 | 0.013154761 | Decrease_in_adherent hypothetical protein                                                                                                                                              |
| A1938_s_at       | -2.916309331 | 0.005174593 | Decrease_in_adherent hypothetical protein                                                                                                                                              |
| A3365_s_at       | -2.913759808 | 0.00101552  | Decrease_in_adherent sucB; dihydroliipoamide succinyltransferase (EC:2.3.1.61); K00658 2-oxoglutarate dehydrogenase E2 component (dihydroliipoamide succinyltransferase) [EC:2.3.1.61] |
| A3314_s_at       | -2.910992612 | 0.002373405 | Decrease_in_adherent nagE; N-acetyl glucosamine specific PTS system components IIAABC (EC:2.7.1.69); K02802 PTS system, N-acetylglucosamine-specific IIA component [EC:2.7.1.69]       |
| A1262_s_at       | -2.907707862 | 0.003725521 | Decrease_in_adherent aer; aerotaxis sensor receptor, flavoprotein ; K03776 aerotaxis receptor                                                                                          |
| A2344_s_at       | -2.905393023 | 0.017175137 | Decrease_in_adherent yjdI; hypothetical protein                                                                                                                                        |
| V4776_s_at       | -2.90352993  | 7.09E-05    | Decrease_in_adherent atpD; F0F1 ATP synthase subunit beta (EC:3.6.3.14); K02112 F-type H <sup>+</sup> -transporting ATPase subunit beta [EC:3.6.3.14]                                  |
| SB5_0121_s_at    | -2.903213785 | 0.024639378 | Decrease_in_adherent dppA; dipeptide transporter ; periplasmic-binding component of ABC superfamily ; K12368 dipeptide transport system substrate-binding protein                      |
| pCoo049_x_at     | -2.895160649 | 0.023218418 | Decrease_in_adherent hypothetical protein                                                                                                                                              |
| A4608_s_at       | -2.893526457 | 0.020867144 | Decrease_in_adherent yeaQ; hypothetical protein                                                                                                                                        |
| A4642_s_at       | -2.892447415 | 0.02347273  | Decrease_in_adherent putative regulator                                                                                                                                                |
| SD1_0411_s_at    | -2.891247583 | 0.012096173 | Decrease_in_adherent hypothetical protein                                                                                                                                              |
| EC869_4486_s_at  | -2.881305575 | 0.003238236 | Decrease_in_adherent kbi; 2-amino-3-ketobutyrate coenzyme A ligase (EC:2.3.1.29); K00639 glycine C-acetyltransferase [EC:2.3.1.29]                                                     |
| A1694_s_at       | -2.871593065 | 0.023601637 | Decrease_in_adherent acid-resistance membrane protein                                                                                                                                  |
| D4819_s_at       | -2.866452744 | 0.025646191 | Decrease_in_adherent putative transposase                                                                                                                                              |
| A1692_s_at       | -2.862825181 | 0.017369073 | Decrease_in_adherent hdeB; acid-resistance protein                                                                                                                                     |
| F2023_at         | -2.860148277 | 0.006966263 | Decrease_in_adherent hypothetical protein                                                                                                                                              |
| SB5_2252_s_at    | -2.858258296 | 0.011064319 | Decrease_in_adherent NO_KEGG_DATA                                                                                                                                                      |
| EC869_3430_s_at  | -2.857665705 | 0.023404186 | Decrease_in_adherent NO_KEGG_DATA                                                                                                                                                      |
| A1125_s_at       | -2.855553906 | 0.01806069  | Decrease_in_adherent hypothetical protein                                                                                                                                              |
| A2477_x_at       | -2.847887717 | 0.003847295 | Decrease_in_adherent yjgD; hypothetical protein ; K09893 hypothetical protein                                                                                                          |
| SFV_1430_s_at    | -2.837876612 | 0.00134001  | Decrease_in_adherent hypothetical protein ; K07180 serine protein kinase                                                                                                               |
| V0028_s_at       | -2.830575204 | 0.017959462 | Decrease_in_adherent frdA; fumarate reductase flavoprotein subunit (EC:1.3.99.1); K00244 fumarate reductase flavoprotein subunit [EC:1.3.99.1]                                         |
| F1141_s_at       | -2.829066368 | 0.003939648 | Decrease_in_adherent hypothetical protein                                                                                                                                              |
| A4533_s_at       | -2.827071973 | 0.014419572 | Decrease_in_adherent hypothetical protein                                                                                                                                              |
| G4679_s_at       | -2.824387383 | 0.006333726 | Decrease_in_adherent entF; enterobactin synthase subunit F; K02364 enterobactin synthetase component F [EC:2.7.7.-]                                                                    |
| A1093_s_at       | -2.817025418 | 0.034196509 | Decrease_in_adherent IS66 family transposase                                                                                                                                           |
| c4499_s_at       | -2.816023636 | 0.036536165 | Decrease_in_adherent NO_KEGG_DATA                                                                                                                                                      |
| A2371_s_at       | -2.813973795 | 0.044893676 | Decrease_in_adherent blc; outer membrane lipoprotein Blc ; K03098 outer membrane lipoprotein Blc                                                                                       |
| F4980_s_at       | -2.812295397 | 0.037667907 | Decrease_in_adherent ferric iron reductase involved in ferric hydroximate transport                                                                                                    |
| c1919_s_at       | -2.812095128 | 0.049050331 | Decrease_in_adherent hypothetical protein                                                                                                                                              |
| A3916_s_at       | -2.811474163 | 0.00321851  | Decrease_in_adherent hypothetical protein                                                                                                                                              |
| V5329_s_at       | -2.810801434 | 0.017178216 | Decrease_in_adherent hypothetical protein                                                                                                                                              |
| A4482_s_at       | -2.807628684 | 0.019715192 | Decrease_in_adherent lpp; murein lipoprotein ; K06078 murein lipoprotein                                                                                                               |
| A4412_s_at       | -2.806427576 | 0.032286766 | Decrease_in_adherent ydgA; hypothetical protein                                                                                                                                        |
| A2205_s_at       | -2.774964904 | 0.025555025 | Decrease_in_adherent rsd; anti-RNA polymerase sigma 70 factor ; K07740 regulator of sigma D                                                                                            |
| V1199_s_at       | -2.773349619 | 0.041022042 | Decrease_in_adherent ycbB; hypothetical protein                                                                                                                                        |
| H4310_x_at       | -2.772854007 | 0.011619359 | Decrease_in_adherent NO_KEGG_DATA                                                                                                                                                      |
| EC869_4317_s_at  | -2.772845472 | 0.006570536 | Decrease_in_adherent serA; D-3-phosphoglycerate dehydrogenase ; K00058 D-3-phosphoglycerate dehydrogenase [EC:1.1.1.95]                                                                |
| ECs2493_s_at     | -2.771756331 | 0.002545456 | Decrease_in_adherent NO_KEGG_DATA                                                                                                                                                      |
| S1023_s_at       | -2.770705544 | 0.010907863 | Decrease_in_adherent NO_KEGG_DATA                                                                                                                                                      |
| V0004_s_at       | -2.766905472 | 0.028023701 | Decrease_in_adherent NO_KEGG_DATA                                                                                                                                                      |
| A3980_s_at       | -2.765967321 | 0.010961457 | Decrease_in_adherent adhE; bifunctional acetaldehyde-CoA/alcohol dehydrogenase ; K00001 alcohol dehydrogenase [EC:1.1.1.1]; K04072 acetaldehyde dehydrogenase [EC:1.2.1.10]            |
| A3097_s_at       | -2.761160023 | 0.000747779 | Decrease_in_adherent hupB; transcriptional regulator HU subunit beta ; K03530 DNA-binding protein HU-beta                                                                              |
| SS5_4352_s_at    | -2.756849946 | 0.000975064 | Decrease_in_adherent NO_KEGG_DATA                                                                                                                                                      |
| pCoo005_at       | -2.750168903 | 0.020837784 | Decrease_in_adherent hypothetical protein                                                                                                                                              |
| b0426_s_at       | -2.746558058 | 0.009212485 | Decrease_in_adherent putative nucleotide-binding protein ; K09767 hypothetical protein                                                                                                 |
| V2584_s_at       | -2.746024716 | 0.016671459 | Decrease_in_adherent hypothetical protein                                                                                                                                              |
| A3684_s_at       | -2.743565438 | 0.008150627 | Decrease_in_adherent NO_KEGG_DATA                                                                                                                                                      |
| ECs4252_x_at     | -2.74197057  | 0.016578455 | Decrease_in_adherent yhgG; hypothetical protein ; K07490 ferrous iron transport protein C                                                                                              |
| V2611_s_at       | -2.739120286 | 0.014052551 | Decrease_in_adherent sodB; superoxide dismutase ; K04564 superoxide dismutase, Fe-Mn family [EC:1.15.1.1]                                                                              |
| A4639_s_at       | -2.731740605 | 0.016934318 | Decrease_in_adherent cold shock-like protein CspC ; K03704 cold shock protein (beta-ribbon, CspA family)                                                                               |
| D4749_s_at       | -2.716897315 | 0.003548856 | Decrease_in_adherent relaxosome component                                                                                                                                              |
| EC869_4411_s_at  | -2.716607688 | 0.014196254 | Decrease_in_adherent NO_KEGG_DATA                                                                                                                                                      |
| A0371_s_at       | -2.707159198 | 0.006386972 | Decrease_in_adherent NO_KEGG_DATA                                                                                                                                                      |
| APECO1_3736_s_at | -2.701380823 | 0.007505041 | Decrease_in_adherent ygdH; hypothetical protein ; K06966                                                                                                                               |
| SD1_2139_s_at    | -2.698033448 | 0.00597171  | Decrease_in_adherent NO_KEGG_DATA                                                                                                                                                      |
| EC869_4008_s_at  | -2.697451947 | 0.044880738 | Decrease_in_adherent pflB; formate acetyltransferase 1 ; K00656 formate C-acetyltransferase [EC:2.3.1.54]                                                                              |
| A0053_s_at       | -2.693841869 | 0.029023179 | Decrease_in_adherent yefM; antitoxin YefM                                                                                                                                              |
| A3820_s_at       | -2.683638675 | 0.026299254 | Decrease_in_adherent hinT; similar to histidine triad-like protein ycf of escherichia coli ; K12150 HIT-like protein HinT                                                              |
| SFV_4273_s_at    | -2.682089379 | 0.005588011 | Decrease_in_adherent cysQ; adenosine-3'(2'),5'-bisphosphate nucleotidase; K03677 CysQ protein                                                                                          |
| b3928_s_at       | -2.681827923 | 0.025447431 | Decrease_in_adherent yjU; hypothetical protein ; K09892 hypothetical protein                                                                                                           |

|                 |              |             |                                                                                                                                                                             |
|-----------------|--------------|-------------|-----------------------------------------------------------------------------------------------------------------------------------------------------------------------------|
| b2665_s_at      | -2.6805374   | 0.001371559 | Decrease_in_adherent ygaU; LysM domain/BON superfamily protein                                                                                                              |
| SB5_3443_s_at   | -2.67470379  | 0.007241326 | Decrease_in_adherent yacA; hypothetical protein                                                                                                                             |
| V5691_s_at      | -2.672355665 | 0.01076121  | Decrease_in_adherent fii; catechol siderophore receptor Fii ; K02014 iron complex outermembrane receptor protein                                                            |
| A4591_s_at      | -2.665988223 | 0.021831044 | Decrease_in_adherent aldol/keto reductase family oxidoreductase (EC:1.1.1.218)                                                                                              |
| A4489_s_at      | -2.663090094 | 0.007377095 | Decrease_in_adherent sufA; iron-sulfur cluster assembly scaffold protein ; K05997 Fe-S cluster assembly protein SufA                                                        |
| K4295_at        | -2.654837222 | 0.025020504 | Decrease_in_adherent thrC; threonine synthase (EC:4.2.3.1); K01733 threonine synthase [EC:4.2.3.1]                                                                          |
| A4157_s_at      | -2.651789036 | 0.011235065 | Decrease_in_adherent NO_KEGG_DATA                                                                                                                                           |
| V3693_s_at      | -2.645272505 | 0.003917998 | Decrease_in_adherent pepD; aminoacyl-histidine dipeptidase (peptidase D) (EC:3.4.13.3); K01270 aminoacylhistidine dipeptidase [EC:3.4.13.3]                                 |
| c1093_s_at      | -2.643178537 | 0.016008377 | Decrease_in_adherent ompA; outer membrane protein A ; K03286 OmpA-OmpF porin, OOP family                                                                                    |
| V4643_s_at      | -2.643016572 | 0.015802947 | Decrease_in_adherent sfsA; sugar fermentation stimulation protein A ; K06206 sugar fermentation stimulation protein A                                                       |
| b0880_s_at      | -2.641977512 | 0.006531667 | Decrease_in_adherent cspD; stationary phase/starvation inducible regulatory protein CspD ; K03704 cold shock protein (beta-ribbon, CspA family)                             |
| EC536_1048_s_at | -2.639745773 | 0.011033175 | Decrease_in_adherent putative glutamate dehydrogenase                                                                                                                       |
| EC536_4089_s_at | -2.638533018 | 0.011211886 | Decrease_in_adherent pgi; glucose-6-phosphate isomerase (EC:5.3.1.9); K01810 glucose-6-phosphate isomerase [EC:5.3.1.9]                                                     |
| EC869_5027_s_at | -2.635544473 | 0.019525585 | Decrease_in_adherent sdhA; succinate dehydrogenase flavoprotein subunit ; K00239 succinate dehydrogenase flavoprotein subunit [EC:1.3.99.1]                                 |
| V0354_s_at      | -2.62997153  | 0.012004354 | Decrease_in_adherent aceA; isocitrate lyase ; K01637 isocitrate lyase [EC:4.1.3.1]                                                                                          |
| A1663_s_at      | -2.629798449 | 0.039840868 | Decrease_in_adherent NO_KEGG_DATA                                                                                                                                           |
| V1193_s_at      | -2.628167817 | 0.010748133 | Decrease_in_adherent aromatic amino acid aminotransferase ; K00813 aspartate aminotransferase [EC:2.6.1.1]                                                                  |
| S95_1846_x_at   | -2.627177264 | 0.005167132 | Decrease_in_adherent sbcB; exonuclease I (EC:3.1.11.1); K01141 exodeoxyribonuclease I [EC:3.1.11.1]                                                                         |
| c0999_s_at      | -2.621288844 | 0.021957834 | Decrease_in_adherent hypothetical protein                                                                                                                                   |
| SD1_3168_s_at   | -2.617172246 | 0.006810824 | Decrease_in_adherent adhE; bifunctional acetaldehyde-CoA/alcohol dehydrogenase ; K00001 alcohol dehydrogenase [EC:1.1.1.1]; K04072 acetaldehyde dehydrogenase [EC:1.2.1.10] |
| V7163_x_at      | -2.613540624 | 0.034399092 | Decrease_in_adherent sbcB; outer membrane receptor FepA ; K02014 iron complex outermembrane receptor protein                                                                |
| A0020_s_at      | -2.613063774 | 0.009913623 | Decrease_in_adherent hypothetical protein                                                                                                                                   |
| A4742_s_at      | -2.611180442 | 0.001923542 | Decrease_in_adherent fliC; flagellin ; K02406 flagellin                                                                                                                     |
| A4772_s_at      | -2.609306204 | 0.02346868  | Decrease_in_adherent mannosyl-3-phosphoglycerate phosphatase (EC:3.1.3.70); K07026 mannosyl-3-phosphoglycerate phosphatase [EC:3.1.3.70]                                    |
| V4383_s_at      | -2.608338024 | 0.006261599 | Decrease_in_adherent pflB; formate acetyltransferase 1 ; K00656 formate C-acetyltransferase [EC:2.3.1.54]                                                                   |
| A3228_s_at      | -2.605610441 | 0.042673644 | Decrease_in_adherent entC; isochorismate hydroxymutase 2 ; K02361 isochorismate synthase [EC:5.4.4.2]                                                                       |
| A3910_s_at      | -2.604904704 | 0.040699625 | Decrease_in_adherent minD; cell division inhibitor MinD ; K03609 septum site-determining protein MinD                                                                       |
| EC869_4578_s_at | -2.598349706 | 0.038544953 | Decrease_in_adherent gloB; hydroxyacylglutathione hydrolase (EC:3.1.2.6); K01069 hydroxyacylglutathione hydrolase [EC:3.1.2.6]                                              |
| A3783_s_at      | -2.589220532 | 0.011486417 | Decrease_in_adherent rimJ; ribosomal-protein-S5-alanine N-acetyltransferase ; K03790 ribosomal-protein-alanine N-acetyltransferase [EC:2.3.1.128]                           |
| c4709_at        | -2.587301362 | 0.001680186 | Decrease_in_adherent hypothetical protein ; K00973 glucose-1-phosphate thymidyltransferase [EC:2.7.7.24]                                                                    |
| A2329_s_at      | -2.582720013 | 0.022911228 | Decrease_in_adherent basR; DNA-binding transcriptional regulator BasR ; K07771 two-component system, OmpR family, response regulator BasR                                   |
| V5388_s_at      | -2.581894117 | 0.002366607 | Decrease_in_adherent asd; aspartate-semialdehyde dehydrogenase (EC:1.2.1.11); K00133 aspartate-semialdehyde dehydrogenase [EC:1.2.1.11]                                     |
| V5387_s_at      | -2.578590239 | 0.000832154 | Decrease_in_adherent asd; aspartate-semialdehyde dehydrogenase (EC:1.2.1.11); K00133 aspartate-semialdehyde dehydrogenase [EC:1.2.1.11]                                     |
| b3339_s_at      | -2.574864789 | 0.009014186 | Decrease_in_adherent tufB; tuf, elongation factor Tu (EC:3.6.5.3); K02358 elongation factor EF-Tu [EC:3.6.5.3]                                                              |
| EC869_0326_s_at | -2.57363505  | 0.011664011 | Decrease_in_adherent envZ; osmolarity sensor protein; K07638 two-component system, OmpR family, osmolarity sensor histidine kinase EnvZ [EC:2.7.13.3]                       |
| EC869_1970_s_at | -2.5655717   | 0.00339936  | Decrease_in_adherent adhE; bifunctional acetaldehyde-CoA/alcohol dehydrogenase ; K00001 alcohol dehydrogenase [EC:1.1.1.1]; K04072 acetaldehyde dehydrogenase [EC:1.2.1.10] |
| SB5_4743_s_at   | -2.564280957 | 0.018781146 | Decrease_in_adherent mobilization protein MobD                                                                                                                              |
| SB5_0350_s_at   | -2.564223099 | 0.047564305 | Decrease_in_adherent ppiA; peptidyl-prolyl cis-trans isomerase A (rotamase A) ; K03767 peptidyl-prolyl cis-trans isomerase A (cyclophilin A) [EC:5.2.1.8]                   |
| SB5_0122_s_at   | -2.561792605 | 0.004616316 | Decrease_in_adherent dppA; dipeptide transport protein ; K12368 dipeptide transport system substrate-binding protein                                                        |
| EC869_0977_s_at | -2.560191533 | 0.002507592 | Decrease_in_adherent hypothetical protein ; K09161 hypothetical protein                                                                                                     |
| N4689_at        | -2.552549342 | 0.004433451 | Decrease_in_adherent NO_KEGG_DATA                                                                                                                                           |
| D3528_s_at      | -2.55084499  | 0.028541349 | Decrease_in_adherent predicted hydrolase                                                                                                                                    |
| V6429_s_at      | -2.547571478 | 0.003860241 | Decrease_in_adherent tpx; thiol peroxidase ; K11065 thiol peroxidase, atypical 2-Cys peroxiredoxin [EC:1.11.1.15]                                                           |
| A0626_s_at      | -2.546611478 | 0.005706567 | Decrease_in_adherent NO_KEGG_DATA                                                                                                                                           |
| A4547_s_at      | -2.542630135 | 0.008385414 | Decrease_in_adherent osmE; DNA-binding transcriptional activator OsmE ; K04064 osmotically inducible lipoprotein OsmE                                                       |
| V0312_s_at      | -2.53808798  | 0.001049873 | Decrease_in_adherent pgi; glucose-6-phosphate isomerase (EC:5.3.1.9); K01810 glucose-6-phosphate isomerase [EC:5.3.1.9]                                                     |
| A0064_s_at      | -2.536213993 | 0.005884276 | Decrease_in_adherent gnd; 6-phosphogluconate dehydrogenase (EC:1.1.1.44); K00033 6-phosphogluconate dehydrogenase [EC:1.1.1.44]                                             |
| A3925_s_at      | -2.535682871 | 0.015247961 | Decrease_in_adherent ycgB; SpoVR family protein                                                                                                                             |
| pCoo091_at      | -2.52792839  | 0.022698401 | Decrease_in_adherent hypothetical protein                                                                                                                                   |
| V4229_s_at      | -2.526284358 | 0.009911082 | Decrease_in_adherent clpB; protein disaggregation chaperone ; K03695 ATP-dependent Clp protease ATP-binding subunit ClpB                                                    |
| A2220_s_at      | -2.524916145 | 0.041359898 | Decrease_in_adherent NO_KEGG_DATA                                                                                                                                           |
| V7181_s_at      | -2.51707668  | 0.003402033 | Decrease_in_adherent entF; enterobactin synthase subunit F ; K02364 enterobactin synthetase component F [EC:2.7.7.-]                                                        |
| A3541_s_at      | -2.50328784  | 0.00919007  | Decrease_in_adherent amid; N-acetylmuramoyl-L-alanine amidase AmiD (EC:3.5.1.28); K11066 N-acetylmuramoyl-L-alanine amidase [EC:3.5.1.28]                                   |
| V3982_s_at      | -2.496524365 | 0.010400949 | Decrease_in_adherent trpB; tryptophan synthase subunit beta (EC:4.2.1.20); K01696 tryptophan synthase beta chain [EC:4.2.1.20]                                              |
| V0793_s_at      | -2.495608777 | 0.000602467 | Decrease_in_adherent pal; peptidoglycan-associated outer membrane lipoprotein ; K03640 peptidoglycan-associated lipoprotein                                                 |
| A0347_s_at      | -2.494544255 | 0.002494474 | Decrease_in_adherent hisJ; histidine ABC transporter, periplasmic histidine-binding protein ; K10014 histidine transport system substrate-binding protein                   |
| b1777_s_at      | -2.491473391 | 0.003845569 | Decrease_in_adherent yeaC; hypothetical protein ; K09916 hypothetical protein                                                                                               |
| SB5_3624_s_at   | -2.491318139 | 0.014954134 | Decrease_in_adherent NO_KEGG_DATA                                                                                                                                           |
| A2199_s_at      | -2.491262969 | 0.004801535 | Decrease_in_adherent rpoC; DNA-directed RNA polymerase subunit beta' (EC:2.7.7.6); K03046 DNA-directed RNA polymerase subunit beta' [EC:2.7.7.6]                            |
| SFV_4079_at     | -2.489588417 | 0.004750564 | Decrease_in_adherent NO_KEGG_DATA                                                                                                                                           |
| A4269_s_at      | -2.488949465 | 0.018817646 | Decrease_in_adherent hypothetical protein ; K13069 diguanylate cyclase [EC:2.7.7.65]                                                                                        |
| V6718_s_at      | -2.48140861  | 0.044934886 | Decrease_in_adherent fruR; DNA-binding transcriptional regulator FruR ; K03435 LacI family transcriptional regulator, fructose operon transcriptional repressor             |
| V6990_s_at      | -2.479996862 | 0.033010477 | Decrease_in_adherent tar; methyl-accepting chemotaxis protein II ; K05875 methyl-accepting chemotaxis protein II, aspartate sensor receptor                                 |
| D0009_s_at      | -2.476558583 | 0.028329676 | Decrease_in_adherent ydfG; 3-hydroxy acid dehydrogenase ; K00540 [EC:1.-.-.-]                                                                                               |
| V2352_s_at      | -2.474889852 | 0.004228226 | Decrease_in_adherent ppnK; inorganic polyphosphate/ATP-NAD kinase (EC:2.7.1.23); K00858 NAD+ kinase [EC:2.7.1.23]                                                           |
| A3372_s_at      | -2.469317984 | 0.017227599 | Decrease_in_adherent cydA; cytochrome d ubiquinol oxidase, subunit I (EC:1.10.3.-); K00425 cytochrome bd-I oxidase subunit I [EC:1.10.3.-]                                  |
| ECP_4135_s_at   | -2.466273515 | 0.030750217 | Decrease_in_adherent glpK; glycerol kinase (EC:2.7.1.30); K00864 glycerol kinase [EC:2.7.1.30]                                                                              |

|                 |              |             |                                                                                                                                                                                    |
|-----------------|--------------|-------------|------------------------------------------------------------------------------------------------------------------------------------------------------------------------------------|
| V3435_s_at      | -2.459671461 | 0.023020073 | Decrease_in_adherent ptsI; phosphoenolpyruvate-protein phosphotransferase (EC:2.7.3.9); K08483 phosphotransferase system, enzyme I, PtsI [EC:2.7.3.9]                              |
| W4306_s_at      | -2.457435637 | 0.008866022 | Decrease_in_adherent hypothetical protein                                                                                                                                          |
| D4754_at        | -2.456478367 | 0.003280304 | Decrease_in_adherent eItA; heat-labile enterotoxin A ; K10928 cholera enterotoxin subunit A [EC:2.4.2.36]                                                                          |
| F0588_s_at      | -2.446319835 | 0.012425814 | Decrease_in_adherent hypothetical protein                                                                                                                                          |
| A3361_s_at      | -2.445927626 | 0.027245132 | Decrease_in_adherent sdhD; succinate dehydrogenase hydrophobic subunit ; K00242 succinate dehydrogenase hydrophobic membrane anchor protein [EC:1.3.99.1]                          |
| L1795_s_at      | -2.444820567 | 0.007680009 | Decrease_in_adherent hypothetical protein                                                                                                                                          |
| V5399_s_at      | -2.442876929 | 0.011747689 | Decrease_in_adherent glgC; glucose-1-phosphate adenyltransferase (EC:2.7.7.27); K00975 glucose-1-phosphate adenyltransferase [EC:2.7.7.27]                                         |
| A3909_s_at      | -2.440168729 | 0.003903392 | Decrease_in_adherent minE; cell division topological specificity factor MinE ; K03608 cell division topological specificity factor                                                 |
| A3411_x_at      | -2.438417419 | 0.006636923 | Decrease_in_adherent NO_KEGG_DATA                                                                                                                                                  |
| A4104_s_at      | -2.428546828 | 0.00318349  | Decrease_in_adherent pspE; thiosulfate:cyanide sulfurtransferase (EC:2.8.1.1); K03972 phage shock protein E                                                                        |
| EC869_3090_s_at | -2.426222618 | 0.007426484 | Decrease_in_adherent acetyl-coenzyme A synthetase (EC:6.2.1.1); K01895 acetyl-CoA synthetase [EC:6.2.1.1]                                                                          |
| V5833_s_at      | -2.423342504 | 0.026908463 | Decrease_in_adherent hslV; ATP-dependent protease peptidase subunit ; K01419 ATP-dependent HslUV protease, peptidase subunit HslV [EC:3.4.25.-]                                    |
| A3349_s_at      | -2.420093018 | 0.009040265 | Decrease_in_adherent ybgL; LamB/YcsF family protein ; K07160                                                                                                                       |
| V7203_s_at      | -2.416266214 | 0.000934969 | Decrease_in_adherent entE; enterobactin synthase subunit E (EC:2.7.7.58); K02363 enterobactin 2,3-dihydroxybenzoate-AMP ligase / S-dihydroxybenzoyltransferase [EC:2.7.7.58 2.3.1. |
| A0254_s_at      | -2.410302455 | 0.002113557 | Decrease_in_adherent eco; ecotin ; K08276 ecotin                                                                                                                                   |
| A0009_s_at      | -2.408768255 | 0.00238599  | Decrease_in_adherent amn; AMP nucleosidase ; K01241 AMP nucleosidase [EC:3.2.2.4]                                                                                                  |
| A3221_at        | -2.404409031 | 0.019361922 | Decrease_in_adherent NO_KEGG_DATA                                                                                                                                                  |
| A0072_at        | -2.390928447 | 0.028106796 | Decrease_in_adherent glycosyl transferase group 2 family protein (EC:2.4.1.-)                                                                                                      |
| J2890_s_at      | -2.386950083 | 0.027712839 | Decrease_in_adherent NO_KEGG_DATA                                                                                                                                                  |
| A4701_s_at      | -2.378833997 | 0.005157093 | Decrease_in_adherent cheY; chemotaxis regulatory protein CheY ; K03413 two-component system, chemotaxis family, response regulator CheY                                            |
| V1095_s_at      | -2.378478081 | 0.024162001 | Decrease_in_adherent ybaS; glutaminase (EC:3.5.1.2); K01425 glutaminase [EC:3.5.1.2]                                                                                               |
| F4472_s_at      | -2.370519759 | 0.010649199 | Decrease_in_adherent rsd; anti-RNA polymerase sigma 70 factor ; K07740 regulator of sigma D                                                                                        |
| A0438_s_at      | -2.369778669 | 0.02513402  | Decrease_in_adherent crr; glucose-specific PTS system component (EC:2.7.1.-); K02777 PTS system, glucose-specific IIA component [EC:2.7.1.69]                                      |
| G1746_s_at      | -2.369425316 | 0.04784187  | Decrease_in_adherent hypothetical protein                                                                                                                                          |
| EC869_8291_s_at | -2.367006867 | 0.020390556 | Decrease_in_adherent crr; glucose-specific PTS system component ; K02777 PTS system, glucose-specific IIA component [EC:2.7.1.69]                                                  |
| A3589_at        | -2.363787387 | 0.029428263 | Decrease_in_adherent hypothetical protein                                                                                                                                          |
| b0145_s_at      | -2.359316323 | 0.013926806 | Decrease_in_adherent dksA; DnaK suppressor protein; K06204 DnaK suppressor protein                                                                                                 |
| V5454_s_at      | -2.3577512   | 0.006607624 | Decrease_in_adherent NO_KEGG_DATA                                                                                                                                                  |
| A4340_s_at      | -2.353263821 | 0.021380202 | Decrease_in_adherent ydfG; 3-hydroxy acid dehydrogenase ; K00540 [EC:1.-.-.-]                                                                                                      |
| A2739_s_at      | -2.352023449 | 0.020400789 | Decrease_in_adherent hypothetical protein                                                                                                                                          |
| b3103_s_at      | -2.349579281 | 0.006997073 | Decrease_in_adherent putative inner membrane protein YhaH                                                                                                                          |
| EC869_5411_s_at | -2.347448909 | 0.016054353 | Decrease_in_adherent yhbL; isoprenoid biosynthesis protein with amidotransferase-like domain                                                                                       |
| V3521_s_at      | -2.346536798 | 0.026192474 | Decrease_in_adherent transketolase (EC:2.2.1.1); K00615 transketolase [EC:2.2.1.1]                                                                                                 |
| EC869_5021_s_at | -2.346295523 | 0.008381563 | Decrease_in_adherent sdhD; succinate dehydrogenase cytochrome b556 small membrane subunit (EC:1.3.5.1); K00242 succinate dehydrogenase hydrophobic membrane anchor protei          |
| V2162_s_at      | -2.343052275 | 0.025880873 | Decrease_in_adherent tldD; protease TldD ; K03568 TldD protein                                                                                                                     |
| V6499_s_at      | -2.340051172 | 0.023902145 | Decrease_in_adherent fabI; enoyl-(acyl carrier protein) reductase (EC:1.3.1.10); K00208 enoyl-[acyl-carrier protein] reductase I [EC:1.3.1.9]                                      |
| SFV_2948_s_at   | -2.326297841 | 0.008240166 | Decrease_in_adherent yqfB; hypothetical protein ; K09900 hypothetical protein                                                                                                      |
| b3858_s_at      | -2.325193818 | 0.000163682 | Decrease_in_adherent hypothetical protein ; K09896 hypothetical protein                                                                                                            |
| A3624_s_at      | -2.318452738 | 0.003297858 | Decrease_in_adherent aspC; aromatic amino acid aminotransferase (EC:2.6.1.57); K00813 aspartate aminotransferase [EC:2.6.1.1]                                                      |
| V6500_s_at      | -2.313240703 | 0.004350088 | Decrease_in_adherent fabI; enoyl-(acyl carrier protein) reductase (EC:1.3.1.10); K00208 enoyl-[acyl-carrier protein] reductase I [EC:1.3.1.9]                                      |
| V4193_s_at      | -2.310022529 | 0.011045905 | Decrease_in_adherent DNA-binding transcriptional activator CaiF ; K08277 transcriptional activator CaiF                                                                            |
| SS5_4205_s_at   | -2.303886931 | 0.020972433 | Decrease_in_adherent ycfP; hypothetical protein ; K07000                                                                                                                           |
| EC869_8306_s_at | -2.300926682 | 0.005202434 | Decrease_in_adherent yfeH; putative cytochrome oxidase                                                                                                                             |
| SD1_3598_s_at   | -2.296682855 | 0.028486123 | Decrease_in_adherent galM; aldose 1-epimerase (EC:5.1.3.-); K01785 aldose 1-epimerase [EC:5.1.3.3]                                                                                 |
| A0334_s_at      | -2.291249642 | 0.044900051 | Decrease_in_adherent ackA; acetate kinase (EC:2.7.2.1); K00925 acetate kinase [EC:2.7.2.1]                                                                                         |
| M0375_s_at      | -2.287931623 | 0.007771592 | Decrease_in_adherent ptsI; phosphoenolpyruvate-protein phosphotransferase (EC:2.7.3.9); K08483 phosphotransferase system, enzyme I, PtsI [EC:2.7.3.9]                              |
| V0311_s_at      | -2.286936029 | 0.032733258 | Decrease_in_adherent pgj; glucose-6-phosphate isomerase (EC:5.3.1.9); K01810 glucose-6-phosphate isomerase [EC:5.3.1.9]                                                            |
| LH0104_s_at     | -2.286787096 | 0.021683112 | Decrease_in_adherent hypothetical protein                                                                                                                                          |
| A2459_s_at      | -2.284632658 | 0.005567884 | Decrease_in_adherent NO_KEGG_DATA                                                                                                                                                  |
| b4406_s_at      | -2.281354558 | 0.006009685 | Decrease_in_adherent yaeP; hypothetical protein                                                                                                                                    |
| pMG8283_03_s_at | -2.274590037 | 0.02477919  | Decrease_in_adherent mobilization protein MobA                                                                                                                                     |
| SB5_4545_s_at   | -2.273743561 | 0.013613811 | Decrease_in_adherent ppnK; inorganic polyphosphate/ATP-NAD kinase (EC:2.7.1.23); K00858 NAD+ kinase [EC:2.7.1.23]                                                                  |
| N0877_s_at      | -2.271838513 | 0.03671766  | Decrease_in_adherent sensory box-containing diguanylate cyclase                                                                                                                    |
| c5607_at        | -2.269424363 | 0.002575037 | Decrease_in_adherent NO_KEGG_DATA                                                                                                                                                  |
| A4380_s_at      | -2.267596713 | 0.016451938 | Decrease_in_adherent speG; spermidine N1-acetyltransferase (EC:2.3.1.57); K00657 diamine N-acetyltransferase [EC:2.3.1.57]                                                         |
| V0313_s_at      | -2.267334806 | 0.023470799 | Decrease_in_adherent pgj; glucose-6-phosphate isomerase (EC:5.3.1.9); K01810 glucose-6-phosphate isomerase [EC:5.3.1.9]                                                            |
| G4653_s_at      | -2.266462009 | 0.021574734 | Decrease_in_adherent hypothetical protein                                                                                                                                          |
| SDY_2498_s_at   | -2.265546458 | 0.008292833 | Decrease_in_adherent yfcF; hypothetical protein                                                                                                                                    |
| EC869_2285_s_at | -2.265218082 | 0.021015204 | Decrease_in_adherent NO_KEGG_DATA                                                                                                                                                  |
| F3693_s_at      | -2.26277164  | 0.02611672  | Decrease_in_adherent NO_KEGG_DATA                                                                                                                                                  |
| SB5_1469_s_at   | -2.259943173 | 0.027598971 | Decrease_in_adherent adhA, adhP; alcohol dehydrogenase ; K00001 alcohol dehydrogenase [EC:1.1.1.1]                                                                                 |
| V6874_s_at      | -2.257945183 | 0.009992837 | Decrease_in_adherent gcvP; glycine dehydrogenase (EC:1.4.4.2); K00282 glycine dehydrogenase subunit 1 [EC:1.4.4.2]; K00283 glycine dehydrogenase subunit 2 [EC:1.4.4.2]            |
| SD1_2134_s_at   | -2.254157966 | 0.033703071 | Decrease_in_adherent vacJ; lipoprotein precursor ; K04754 lipoprotein                                                                                                              |
| A1330_s_at      | -2.25389644  | 0.040600824 | Decrease_in_adherent agaR; DNA-binding transcriptional regulator AgaR; K02081 DeoR family transcriptional regulator, aga operon transcriptional repressor                          |
| Z6074_s_at      | -2.251892338 | 0.008326905 | Decrease_in_adherent hypothetical protein                                                                                                                                          |
| A0398_s_at      | -2.250451005 | 0.044233674 | Decrease_in_adherent evgA; DNA-binding transcriptional activator EvgA ; K07690 two-component system, NarL family, response regulator EvgA                                          |
| A3843_s_at      | -2.247842108 | 0.029454955 | Decrease_in_adherent putative inner membrane protein                                                                                                                               |

|                  |              |              |                                                                                                                                                                                      |
|------------------|--------------|--------------|--------------------------------------------------------------------------------------------------------------------------------------------------------------------------------------|
| A4131_s_at       | -2.241867905 | 0.009066445  | Decrease_in_adherent ynaJ; hypothetical protein                                                                                                                                      |
| V1509_s_at       | -2.239056731 | 0.016351902  | Decrease_in_adherent gapA; glyceraldehyde-3-phosphate dehydrogenase A ; K00134 glyceraldehyde 3-phosphate dehydrogenase [EC:1.2.1.12]                                                |
| A3363_s_at       | -2.235889557 | 0.009133328  | Decrease_in_adherent sdhB; succinate dehydrogenase iron-sulfur subunit (EC:1.3.99.1); K00240 succinate dehydrogenase iron-sulfur protein [EC:1.3.99.1]                               |
| A0436_s_at       | -2.234781565 | 0.009860457  | Decrease_in_adherent ptsH; phosphocarrier protein HPr (EC:2.7.1.69 2.7.3.9); K02784 phosphocarrier protein HPr                                                                       |
| UT189_C0886_at   | -2.234543152 | 0.008899867  | Decrease_in_adherent hypothetical protein                                                                                                                                            |
| EC869_5211_s_at  | -2.233038126 | 0.003537253  | Decrease_in_adherent hypothetical protein                                                                                                                                            |
| V1600_s_at       | -2.226262407 | 0.008594725  | Decrease_in_adherent mutS; DNA mismatch repair protein MutS ; K03555 DNA mismatch repair protein MutS                                                                                |
| SD1_3403_s_at    | -2.224146058 | 0.008851526  | Decrease_in_adherent glutamate and aspartate transporter subunit ; K10001 glutamate/aspartate transport system substrate-binding protein                                             |
| A2908_s_at       | -2.223400092 | 0.006207485  | Decrease_in_adherent cri; DNA-binding transcriptional regulator Cri ; K11926 sigma factor-binding protein Cri                                                                        |
| ECs5520_s_at     | -2.222127999 | 0.035007352  | Decrease_in_adherent hypothetical protein                                                                                                                                            |
| SD1_0613_s_at    | -2.215606182 | 0.004300731  | Decrease_in_adherent did; D-lactate dehydrogenase (EC:1.1.1.28); K03777 D-lactate dehydrogenase [EC:1.1.1.28]                                                                        |
| A3442_s_at       | -2.204028849 | 0.00899203   | Decrease_in_adherent putative kinase inhibitor protein ; K06910                                                                                                                      |
| ECP_4493_x_at    | -2.203462104 | 0.000730094  | Decrease_in_adherent NO_KEGG_DATA                                                                                                                                                    |
| SD1_1682_s_at    | -2.200710061 | 0.021896575  | Decrease_in_adherent apbA; 2-dehydropantoate 2-reductase (EC:1.1.1.169); K00077 2-dehydropantoate 2-reductase [EC:1.1.1.169]                                                         |
| EC869_5178_s_at  | -2.200189972 | 0.003773211  | Decrease_in_adherent lpdA; dihydrolipoamide dehydrogenase (EC:1.8.1.4); K00382 dihydrolipoamide dehydrogenase [EC:1.8.1.4]                                                           |
| V0844_s_at       | -2.197511231 | 0.014418334  | Decrease_in_adherent hfq; RNA-binding protein Hfq ; K03666 host factor-I protein                                                                                                     |
| A2897_s_at       | -2.197476899 | 0.038024688  | Decrease_in_adherent putative HicB                                                                                                                                                   |
| SD1_3096_s_at    | -2.194090501 | 0.007614936  | Decrease_in_adherent hypothetical protein                                                                                                                                            |
| V1458_s_at       | -2.191532336 | 0.03111944   | Decrease_in_adherent sdaA; L-serine ammonia-lyase 1 (EC:4.3.1.17); K01752 L-serine dehydratase [EC:4.3.1.17]                                                                         |
| A1013_s_at       | -2.188901266 | 0.048096353  | Decrease_in_adherent metK; S-adenosylmethionine synthetase (EC:2.5.1.6); K00789 S-adenosylmethionine synthetase [EC:2.5.1.6]                                                         |
| b1519_s_at       | -2.184148155 | 0.014415884  | Decrease_in_adherent NO_KEGG_DATA                                                                                                                                                    |
| V0768_s_at       | -2.183812471 | 0.030550836  | Decrease_in_adherent fre; FMN reductase ; K05368 aquacobalamin reductase / NAD(P)H-flavin reductase [EC:1.16.1.3 1.5.1.29]                                                           |
| SB5_1470_x_at    | -2.182081258 | 0.007190094  | Decrease_in_adherent adhP, adhA; alcohol dehydrogenase ; K00001 alcohol dehydrogenase [EC:1.1.1.1]                                                                                   |
| b1881_s_at       | -2.181168843 | 0.001247363  | Decrease_in_adherent cheZ; chemotaxis regulator CheZ ; K03414 chemotaxis protein CheZ                                                                                                |
| A4619_s_at       | -2.177678848 | 0.000739541  | Decrease_in_adherent fadD; long-chain-fatty-acid-CoA ligase (EC:6.2.1.3); K01897 long-chain acyl-CoA synthetase [EC:6.2.1.3]                                                         |
| A3777_s_at       | -2.17294123  | 0.02749866   | Decrease_in_adherent bssS, yoeP; biofilm formation regulatory protein BssS ; K12148 biofilm regulator BssS                                                                           |
| SD1_0474_s_at    | -2.171410714 | 0.028279303  | Decrease_in_adherent glgC; glucose-1-phosphate adenylyltransferase (EC:2.7.7.27); K00975 glucose-1-phosphate adenylyltransferase [EC:2.7.7.27]                                       |
| A2643_s_at       | -2.168298908 | 0.046726191  | Decrease_in_adherent two-component response regulator ; K07773 two-component system, OmpR family, aerobic respiration control protein ArcA                                           |
| A0621_s_at       | -2.164511039 | 0.008150874  | Decrease_in_adherent clpB; protein disaggregation chaperone ; K03695 ATP-dependent Clp protease ATP-binding subunit ClpB                                                             |
| A4519_s_at       | -2.159511349 | 0.001083234  | Decrease_in_adherent pheT; phenylalanyl-tRNA synthetase subunit beta (EC:6.1.1.20); K01890 phenylalanyl-tRNA synthetase beta chain [EC:6.1.1.20]                                     |
| A3557_s_at       | -2.157681776 | 0.030871631  | Decrease_in_adherent clpS; ATP-dependent Clp protease adaptor protein ClpS ; K06891 ATP-dependent Clp protease adaptor protein ClpS                                                  |
| A1527_s_at       | -2.156753816 | 0.038572921  | Decrease_in_adherent crp; cAMP-regulatory protein ; K10914 CRP/FNR family transcriptional regulator, cyclic AMP receptor protein                                                     |
| APECO1_2149_s_at | -2.154420003 | 0.026268183  | Decrease_in_adherent yjgF; hypothetical protein ; K09022 UPF0076 protein YjgF                                                                                                        |
| A4485_s_at       | -2.152502355 | 0.018877548  | Decrease_in_adherent sufS; bifunctional cysteine desulfurase/selenocysteine lyase (EC:2.8.1.7 4.4.1.16); K11717 cysteine desulfurase / selenocysteine lyase [EC:2.8.1.7 4.4.1.16]    |
| b0605_s_at       | -2.148900856 | 0.002335724  | Decrease_in_adherent ahpC; alkyl hydroperoxide reductase subunit C (EC:1.11.1.15); K03386 peroxiredoxin (alkyl hydroperoxide reductase subunit C) [EC:1.11.1.15]                     |
| SD1_0562_s_at    | -2.148375513 | 0.010518015  | Decrease_in_adherent folE; GTP cyclohydrolase I (EC:3.5.4.16); K01495 GTP cyclohydrolase I [EC:3.5.4.16]                                                                             |
| V2537_s_at       | -2.146778094 | 0.043420129  | Decrease_in_adherent hdhA; 7-alpha-hydroxysteroid dehydrogenase (EC:1.1.1.159); K00076 7-alpha-hydroxysteroid dehydrogenase [EC:1.1.1.159]                                           |
| SS5_4239_s_at    | -2.135419109 | 0.014641823  | Decrease_in_adherent putative aldehyde dehydrogenase ; K06447 succinylglutamic semialdehyde dehydrogenase [EC:1.2.1.71]                                                              |
| V0732_s_at       | -2.130136513 | 0.024025943  | Decrease_in_adherent putative DNA-binding transcriptional regulator                                                                                                                  |
| A2631_s_at       | -2.127005074 | 0.004055986  | Decrease_in_adherent ybeJ; nicotinamide-nucleotide adenylyltransferase (EC:2.7.7.1); K00952 nicotinamide-nucleotide adenylyltransferase [EC:2.7.7.1]; K06210 ribosylnicotinamide kin |
| N4115_x_at       | -2.126077651 | 0.002355293  | Decrease_in_adherent yjgD; hypothetical protein ; K09893 hypothetical protein                                                                                                        |
| A3915_s_at       | -2.125434489 | 0.012466184  | Decrease_in_adherent hypothetical protein ; K09902 hypothetical protein                                                                                                              |
| A2373_s_at       | -2.121718863 | 0.037076728  | Decrease_in_adherent frdD; fumarate reductase subunit D ; K00247 fumarate reductase subunit D [EC:1.3.99.1]                                                                          |
| V4574_s_at       | -2.119956232 | 0.028121509  | Decrease_in_adherent NO_KEGG_DATA                                                                                                                                                    |
| SD1_2489_s_at    | -2.117920406 | 0.021658452  | Decrease_in_adherent hypothetical protein                                                                                                                                            |
| V0855_s_at       | -2.1177966   | 0.040975778  | Decrease_in_adherent purA; adenylosuccinate synthetase (EC:6.3.4.4); K01939 adenylosuccinate synthase [EC:6.3.4.4]                                                                   |
| A3486_s_at       | -2.117521766 | 0.033101954  | Decrease_in_adherent ompX; outer membrane protein X ; K11934 outer membrane protein X                                                                                                |
| A0582_s_at       | -2.11748576  | 0.014601422  | Decrease_in_adherent NO_KEGG_DATA                                                                                                                                                    |
| SB5_4039_s_at    | -2.116739012 | 0.000555546  | Decrease_in_adherent ybeJ; glutamate and aspartate transporter subunit ; K10001 glutamate/aspartate transport system substrate-binding protein                                       |
| V3422_s_at       | -2.114997556 | 0.027760539  | Decrease_in_adherent kefG; glutathione-regulated potassium-efflux system ancillary protein KefG ; K11748 glutathione-regulated potassium-efflux system ancillary protein KefG        |
| EC536_3670_s_at  | -2.114407034 | 0.001757439  | Decrease_in_adherent atpG; FOF1 ATP synthase subunit gamma (EC:3.6.3.14); K02115 F-type H+-transporting ATPase subunit gamma [EC:3.6.3.14]                                           |
| V5396_s_at       | -2.113888107 | 0.019752762  | Decrease_in_adherent glgX; glycogen debranching enzyme ; K02438 glycogen operon protein GlgX [EC:3.2.1.-]                                                                            |
| EC869_2844_s_at  | -2.111588826 | 0.025517031  | Decrease_in_adherent miaA; delta(2)-isopentenylpyrophosphate tRNA-adenosine transferase; K00791 tRNA delta(2)-isopentenylpyrophosphate transferase [EC:2.5.1.8]                      |
| EC869_2587_s_at  | -2.111163264 | 0.018925867  | Decrease_in_adherent cheY; chemotaxis response regulator ; K03413 two-component system, chemotaxis family, response regulator CheY                                                   |
| A3042_s_at       | -2.10848894  | 0.0005506352 | Decrease_in_adherent hypothetical protein ; K09913 hypothetical protein                                                                                                              |
| A0057_s_at       | -2.102705453 | 0.001485924  | Decrease_in_adherent hisB; imidazoleglycerol-phosphate dehydratase/histidinol-phosphate phosphatase ; K01089 imidazoleglycerol-phosphate dehydratase / histidinol-phosphatase [EC:   |
| D3362_x_at       | -2.101307798 | 0.035018986  | Decrease_in_adherent tktA; transketolase (EC:2.2.1.1); K00615 transketolase [EC:2.2.1.1]                                                                                             |
| V5769_s_at       | -2.100656461 | 0.004093996  | Decrease_in_adherent ppc; phosphoenolpyruvate carboxylase (EC:4.1.1.31); K01595 phosphoenolpyruvate carboxylase [EC:4.1.1.31]                                                        |
| V5918_s_at       | -2.100535966 | 0.024679676  | Decrease_in_adherent NO_KEGG_DATA                                                                                                                                                    |
| SD1_3571_s_at    | -2.097598351 | 0.015859053  | Decrease_in_adherent yaeO; Rho-binding antiterminator                                                                                                                                |
| SB0_3336_s_at    | -2.095566583 | 0.008152529  | Decrease_in_adherent yhfA; hypothetical protein ; K07397 putative redox protein                                                                                                      |
| L4777_s_at       | -2.089382105 | 0.047254149  | Decrease_in_adherent parM; plasmid segregation protein ParM                                                                                                                          |
| A2905_s_at       | -2.086039357 | 0.01999038   | Decrease_in_adherent pepD; aminoacyl-histidine dipeptidase ; K01270 aminoacylhistidine dipeptidase [EC:3.4.13.3]                                                                     |
| F1834_s_at       | -2.085427571 | 0.012252619  | Decrease_in_adherent transcriptional regulator SlyA ; K06075 MarR family transcriptional regulator, transcriptional regulator for hemolysin                                          |
| V3698_x_at       | -2.085322598 | 0.012027959  | Decrease_in_adherent cri; DNA-binding transcriptional regulator Cri ; K11926 sigma factor-binding protein Cri                                                                        |
| A2807_s_at       | -2.084104236 | 0.015884955  | Decrease_in_adherent pts; 5'-methylthioadenosine/S-adenosylhomocysteine nucleosidase (EC:3.2.2.9); K01243 S-adenosylhomocysteine/5'-methylthioadenosine nucleosidase [EC:3.2.2.9]    |
| V4112_s_at       | -2.083531506 | 0.016489829  | Decrease_in_adherent glyA; serine hydroxymethyltransferase (EC:2.1.2.1); K00600 glycine hydroxymethyltransferase [EC:2.1.2.1]                                                        |

|                    |              |             |                                                                                                                                                                                      |
|--------------------|--------------|-------------|--------------------------------------------------------------------------------------------------------------------------------------------------------------------------------------|
| V6875_s_at         | -2.080086393 | 0.025048146 | Decrease_in_adherent gcvP; glycine dehydrogenase (EC:1.4.4.2); K00282 glycine dehydrogenase subunit 1 [EC:1.4.4.2]; K00283 glycine dehydrogenase subunit 2 [EC:1.4.4.2]              |
| A1361_s_at         | -2.076412523 | 0.001795342 | Decrease_in_adherent yhbW; hypothetical protein                                                                                                                                      |
| V7054_s_at         | -2.0732283   | 0.009607469 | Decrease_in_adherent zwf; glucose-6-phosphate 1-dehydrogenase (EC:1.1.1.49); K00036 glucose-6-phosphate 1-dehydrogenase [EC:1.1.1.49]                                                |
| A1971_s_at         | -2.067156749 | 0.007368372 | Decrease_in_adherent iivD; dihydroxy-acid dehydratase (EC:4.2.1.9); K01687 dihydroxy-acid dehydratase [EC:4.2.1.9]                                                                   |
| A2738_s_at         | -2.054457751 | 0.033276903 | Decrease_in_adherent ftsA; cell division protein FtsA; K03590 cell division protein FtsA                                                                                             |
| c3307_s_at         | -2.054068104 | 0.017827443 | Decrease_in_adherent RNA polymerase sigma factor RpoS; K03087 RNA polymerase nonessential primary-like sigma factor                                                                  |
| EC869_3914_s_at    | -2.053578425 | 0.002614654 | Decrease_in_adherent elongation factor Tu; K02358 elongation factor EF-Tu [EC:3.6.5.3]                                                                                               |
| APECO1_3321_at     | -2.050922449 | 0.027594094 | Decrease_in_adherent NO_KEGG_DATA                                                                                                                                                    |
| SB5_3084_s_at      | -2.049247516 | 0.022506242 | Decrease_in_adherent cirA; colicin I receptor; K02014 iron complex outer membrane receptor protein                                                                                   |
| c0823_s_at         | -2.046654628 | 0.006885553 | Decrease_in_adherent hypothetical protein                                                                                                                                            |
| F1227_s_at         | -2.046077128 | 0.035747151 | Decrease_in_adherent cupin family protein                                                                                                                                            |
| EC869_8298_x_at    | -2.043821894 | 0.008658103 | Decrease_in_adherent cystK; cysteine synthase A; K01738 cysteine synthase A [EC:2.5.1.47]                                                                                            |
| F1880_s_at         | -2.040513824 | 0.012112774 | Decrease_in_adherent putative inner membrane protein                                                                                                                                 |
| pCoo050_at         | -2.038118169 | 0.04706861  | Decrease_in_adherent NO_KEGG_DATA                                                                                                                                                    |
| SFV_3581_s_at      | -2.029478971 | 0.002903448 | Decrease_in_adherent cpxR; DNA-binding transcriptional regulator CpxR; K07662 two-component system, OmpR family, response regulator CpxR                                             |
| V2361_s_at         | -2.02686509  | 0.016094868 | Decrease_in_adherent fliC; cystine transporter subunit; K02424 cystine transport system substrate-binding protein                                                                    |
| UTI89_C0178_s_at   | -2.024251714 | 0.001072527 | Decrease_in_adherent yaeG; carbohydrate diacid transcriptional activator CdaR; K02647 carbohydrate diacid regulator                                                                  |
| AFFX-r2-Bs-thr-3_s | -2.023501405 | 0.005603369 | Decrease_in_adherent thrB; homoserine kinase (EC:2.7.1.39); K00872 homoserine kinase [EC:2.7.1.39]                                                                                   |
| SD1_2453_s_at      | -2.023411099 | 0.02496216  | Decrease_in_adherent ppc; phosphoenolpyruvate carboxylase (EC:4.1.1.31); K01595 phosphoenolpyruvate carboxylase [EC:4.1.1.31]                                                        |
| b2908_s_at         | -2.01680867  | 0.027832164 | Decrease_in_adherent pepP; proline aminopeptidase P II; K01262 X-Pro aminopeptidase [EC:3.4.11.9]                                                                                    |
| EC869_3486_s_at    | -2.016016146 | 0.008863375 | Decrease_in_adherent artI; arginine 3rd transport system periplasmic binding protein; K09997 arginine transport system substrate-binding protein                                     |
| V0404_s_at         | -2.010865229 | 0.019344995 | Decrease_in_adherent rpoB; DNA-directed RNA polymerase subunit beta (EC:2.7.7.6); K03043 DNA-directed RNA polymerase subunit beta [EC:2.7.7.6]                                       |
| AFFX-ThrX-3_at     | -2.009219041 | 0.007027587 | Decrease_in_adherent thrB; homoserine kinase (EC:2.7.1.39); K00872 homoserine kinase [EC:2.7.1.39]                                                                                   |
| V2140_s_at         | -2.008483837 | 0.001763096 | Decrease_in_adherent glnE; fused deadenylyltransferase/adenylyltransferase for glutamine synthetase (EC:2.7.7.42); K00982 glutamate-ammonia-ligase adenylyltransferase [EC:2.7.7.42] |
| AFFX-r2-Bs-phe-3_a | -2.008160906 | 0.00820383  | Decrease_in_adherent pheA; prephenate dehydratase (EC:4.2.1.51); K04518 prephenate dehydratase [EC:4.2.1.51]                                                                         |
| b1477_s_at         | -2.007140663 | 0.005296862 | Decrease_in_adherent yddM; hypothetical protein                                                                                                                                      |
| V7305_s_at         | -2.004695979 | 0.025465319 | Decrease_in_adherent ycfQ; hypothetical protein                                                                                                                                      |
| G3937_s_at         | -2.00396883  | 0.038050665 | Decrease_in_adherent putative PsiA                                                                                                                                                   |
| A2931_s_at         | -2.003365243 | 0.044603669 | Decrease_in_adherent yagU; hypothetical protein; K08996 putative membrane protein                                                                                                    |
| EC869_7314_s_at    | -2.003207387 | 0.030696837 | Decrease_in_adherent tsx; nucleoside channel; K05517 nucleoside-specific channel-forming protein                                                                                     |
| A2260_s_at         | -2.002025627 | 0.033528249 | Decrease_in_adherent yjbJ; putative stress-response protein                                                                                                                          |
| EC869_2918_s_at    | -2.000773441 | 0.005666664 | Decrease_in_adherent dcuA; anaerobic C4-dicarboxylate transporter DcuA; K07791 anaerobic C4-dicarboxylate transporter DcuA                                                           |
| AFFX-ThrX-M_at     | -2.000714496 | 0.005734643 | Decrease_in_adherent thrC; threonine synthase (EC:4.2.3.1); K01733 threonine synthase [EC:4.2.3.1]                                                                                   |
| F4536_s_at         | -1.998122418 | 0.01269733  | Decrease_in_adherent yjbK; zinc uptake transcriptional repressor; K09823 Fur family transcriptional regulator, zinc uptake regulator                                                 |
| A3911_s_at         | -1.997816903 | 0.032272754 | Decrease_in_adherent minC; septum formation inhibitor; K03610 septum site-determining protein MinC                                                                                   |
| J2220_s_at         | -1.995636151 | 0.029384169 | Decrease_in_adherent dinD; DNA-damage-inducible protein D                                                                                                                            |
| V4114_s_at         | -1.995444807 | 0.006377349 | Decrease_in_adherent glyA; serine hydroxymethyltransferase (EC:2.1.2.1); K00600 glycine hydroxymethyltransferase [EC:2.1.2.1]                                                        |
| A3867_s_at         | -1.994963252 | 0.041964511 | Decrease_in_adherent hypothetical protein                                                                                                                                            |
| b1094_s_at         | -1.993514663 | 0.005515768 | Decrease_in_adherent hypothetical protein                                                                                                                                            |
| AFFX-r2-Bs-thr-5_s | -1.993476812 | 0.004707147 | Decrease_in_adherent thrC; threonine synthase (EC:4.2.3.1); K01733 threonine synthase [EC:4.2.3.1]                                                                                   |
| V0314_s_at         | -1.986056871 | 0.035809829 | Decrease_in_adherent pgi; glucose-6-phosphate isomerase (EC:5.3.1.9); K01810 glucose-6-phosphate isomerase [EC:5.3.1.9]                                                              |
| AFFX-r2-Bs-thr-M_s | -1.985497351 | 0.004804081 | Decrease_in_adherent thrC; threonine synthase (EC:4.2.3.1); K01733 threonine synthase [EC:4.2.3.1]                                                                                   |
| V3883_s_at         | -1.983044318 | 0.007253868 | Decrease_in_adherent succinate dehydrogenase, flavoprotein subunit                                                                                                                   |
| F3408_s_at         | -1.979590679 | 0.01928341  | Decrease_in_adherent glutathionylspermidine synthase family protein                                                                                                                  |
| V2981_s_at         | -1.978962829 | 0.049597506 | Decrease_in_adherent aminotransferase; K10907 aminotransferase [EC:2.6.1.-]                                                                                                          |
| V3854_s_at         | -1.975709885 | 0.004951059 | Decrease_in_adherent ycfW; outer membrane-specific lipoprotein transporter subunit LolE; K09808 lipoprotein-releasing system permease protein                                        |
| SDY_1801_s_at      | -1.975358604 | 0.030990507 | Decrease_in_adherent hypothetical protein                                                                                                                                            |
| S3181_s_at         | -1.974669358 | 0.020456359 | Decrease_in_adherent reverse transcriptase-like protein                                                                                                                              |
| c0540_s_at         | -1.974145892 | 0.023376158 | Decrease_in_adherent NO_KEGG_DATA                                                                                                                                                    |
| A0849_s_at         | -1.973915345 | 0.044099542 | Decrease_in_adherent rimM; rRNA large subunit methyltransferase M; K06968                                                                                                            |
| ECs2438_s_at       | -1.97374199  | 0.010283155 | Decrease_in_adherent katE; hydroperoxidase II (EC:1.11.1.6); K03781 catalase [EC:1.11.1.6]                                                                                           |
| b2741_s_at         | -1.968725571 | 0.013531646 | Decrease_in_adherent hypothetical protein                                                                                                                                            |
| UTI89_C4861_x_at   | -1.967326245 | 0.004012767 | Decrease_in_adherent rraB; uncharacterized protein YjgD; K09893 hypothetical protein                                                                                                 |
| A1609_s_at         | -1.966417716 | 0.034467965 | Decrease_in_adherent glgB; glycogen branching enzyme (EC:2.4.1.18); K00700 1,4-alpha-glucan branching enzyme [EC:2.4.1.18]                                                           |
| ECs0750_s_at       | -1.965988599 | 0.002371473 | Decrease_in_adherent hypothetical protein                                                                                                                                            |
| EC869_8209_s_at    | -1.962279566 | 0.025281673 | Decrease_in_adherent transketolase (EC:2.2.1.1); K00615 transketolase [EC:2.2.1.1]                                                                                                   |
| A1064_s_at         | -1.962118462 | 0.023812584 | Decrease_in_adherent hypothetical protein                                                                                                                                            |
| A3853_s_at         | -1.961117545 | 0.005499159 | Decrease_in_adherent hypothetical protein                                                                                                                                            |
| b1886_s_at         | -1.960310212 | 0.030261086 | Decrease_in_adherent tar; methyl-accepting chemotaxis protein II; K05875 methyl-accepting chemotaxis protein II, aspartate sensor receptor                                           |
| D3529_at           | -1.95721734  | 0.032684721 | Decrease_in_adherent finO; fertility inhibition protein                                                                                                                              |
| M3861_s_at         | -1.956957504 | 0.024568762 | Decrease_in_adherent stable plasmid inheritance protein                                                                                                                              |
| AFFX-ThrX-5_at     | -1.955063626 | 0.003616219 | Decrease_in_adherent thrC; threonine synthase (EC:4.2.3.1); K01733 threonine synthase [EC:4.2.3.1]                                                                                   |
| V2075_s_at         | -1.954412642 | 0.008635036 | Decrease_in_adherent ygiU; serine/threonine transporter SstT; K07862 serine/threonine transporter                                                                                    |
| S3180_s_at         | -1.952672561 | 0.005011951 | Decrease_in_adherent reverse transcriptase-like protein                                                                                                                              |
| AFFX-PheX-5_at     | -1.952090152 | 0.006501378 | Decrease_in_adherent pheB; hypothetical protein; K06209 chorismate mutase [EC:5.4.99.5]                                                                                              |
| A1530_s_at         | -1.948974739 | 0.038852228 | Decrease_in_adherent pabA; aminodeoxychorismate synthase subunit II                                                                                                                  |
| AFFX-r2-Bs-phe-M_i | -1.947618463 | 0.007986072 | Decrease_in_adherent pheA; prephenate dehydratase (EC:4.2.1.51); K04518 prephenate dehydratase [EC:4.2.1.51]                                                                         |



|                    |              |             |                                                                                                                                                          |
|--------------------|--------------|-------------|----------------------------------------------------------------------------------------------------------------------------------------------------------|
| SBO_0253_at        | -1.946032462 | 0.009325759 | Decrease_in_adherent IS629 ORF1                                                                                                                          |
| A2825_s_at         | -1.944167967 | 0.023032809 | Decrease_in_adherent hlpA; periplasmic chaperone ; K06142 outer membrane protein                                                                         |
| V3607_s_at         | -1.940916781 | 0.012333794 | Decrease_in_adherent hypothetical protein                                                                                                                |
| ECs1050_s_at       | -1.940496891 | 0.019673632 | Decrease_in_adherent hypothetical protein                                                                                                                |
| V2862_s_at         | -1.936157397 | 0.033392826 | Decrease_in_adherent fba; fructose-bisphosphate aldolase (EC:4.1.2.13); K01624 fructose-bisphosphate aldolase, class II [EC:4.1.2.13]                    |
| SD1_1536_s_at      | -1.935560611 | 0.018489265 | Decrease_in_adherent fecR; fec operon regulator FecR ; K07165 transmembrane sensor                                                                       |
| AFFX-r2-Bs-phe-5_a | -1.934886673 | 0.005366732 | Decrease_in_adherent pheB; hypothetical protein; K06209 chorismate mutase [EC:5.4.99.5]                                                                  |
| V0767_s_at         | -1.934366447 | 0.007425332 | Decrease_in_adherent fre, ubiB, fadI; FMN reductase (EC:1.5.1.29); K05368 aquacobalamin reductase / NAD(P)H-flavin reductase [EC:1.16.1.3 1.5.1.29]      |
| EC536_3561_s_at    | -1.934028476 | 0.024471271 | Decrease_in_adherent folE; GTP cyclohydrolase I (EC:3.5.4.16); K01495 GTP cyclohydrolase I [EC:3.5.4.16]                                                 |
| b3283_s_at         | -1.933485461 | 0.046838407 | Decrease_in_adherent yrdD; putative DNA topoisomerase ; K07479 putative DNA topoisomerase                                                                |
| EC869_5670_s_at    | -1.932279004 | 0.01630529  | Decrease_in_adherent luxS; S-ribosylhomocysteine lyase; K07173 S-ribosylhomocysteine lyase [EC:4.4.1.21]                                                 |
| A1294_s_at         | -1.929532104 | 0.030465862 | Decrease_in_adherent yqjD; hypothetical protein                                                                                                          |
| A0767_at           | -1.926757739 | 0.019114662 | Decrease_in_adherent mutS; DNA mismatch repair protein MutS ; K03555 DNA mismatch repair protein MutS                                                    |
| G1262_s_at         | -1.923574603 | 0.027745324 | Decrease_in_adherent trg; methyl-accepting chemotaxis protein III ; K05876 methyl-accepting chemotaxis protein III, ribose and galactose sensor receptor |
| V5190_s_at         | -1.923477159 | 0.048146951 | Decrease_in_adherent bcsE; cellulose biosynthesis protein BcsE                                                                                           |
| EC869_3973_s_at    | -1.921920632 | 0.005153532 | Decrease_in_adherent transcriptional regulator, AsnC family                                                                                              |
| ECP_2590_s_at      | -1.921179441 | 0.013835129 | Decrease_in_adherent conserved hypothetical protein, putative transposase (fragment)                                                                     |
| AFFX-PheX-3_at     | -1.921006022 | 0.008835985 | Decrease_in_adherent pheA; prephenate dehydratase (EC:4.2.1.51); K04518 prephenate dehydratase [EC:4.2.1.51]                                             |
| EC536_6355_s_at    | -1.920833806 | 0.038719093 | Decrease_in_adherent trpS; tryptophanyl-tRNA synthetase (EC:6.1.1.2); K01867 tryptophanyl-tRNA synthetase [EC:6.1.1.2]                                   |
| EC869_7926_s_at    | -1.919979154 | 0.043453268 | Decrease_in_adherent prolyl-tRNA synthetase ; K01881 prolyl-tRNA synthetase [EC:6.1.1.15]                                                                |
| AFFX-r2-Bs-dap-M_i | -1.916409249 | 0.004064818 | Decrease_in_adherent mgsA; methylglyoxal synthase (EC:4.2.3.3); K01734 methylglyoxal synthase [EC:4.2.3.3]                                               |
| EC869_1963_s_at    | -1.912649908 | 0.003898313 | Decrease_in_adherent hns; global DNA-binding transcriptional dual regulator H-NS ; K03746 DNA-binding protein H-NS                                       |
| A3035_s_at         | -1.910556078 | 0.047475066 | Decrease_in_adherent psiF; induced by phosphate starvation                                                                                               |
| A1054_at           | -1.90952965  | 0.005244132 | Decrease_in_adherent hypothetical protein                                                                                                                |
| EC869_0563_s_at    | -1.906889208 | 0.006339628 | Decrease_in_adherent prfC; oligopeptidase A ; K01414 oligopeptidase A [EC:3.4.24.70]                                                                     |
| EC869_2599_s_at    | -1.906730833 | 0.012991255 | Decrease_in_adherent tar; methyl-accepting chemotaxis protein II; K05875 methyl-accepting chemotaxis protein II, aspartate sensor receptor               |
| V7001_s_at         | -1.906615575 | 0.000337173 | Decrease_in_adherent tap; methyl-accepting protein IV ; K05877 methyl-accepting chemotaxis protein IV, peptide sensor receptor                           |
| AFFX-DapX-3_at     | -1.905976116 | 0.005248425 | Decrease_in_adherent ypjG; hypothetical protein                                                                                                          |
| V3865_s_at         | -1.903348577 | 0.016640244 | Decrease_in_adherent hypothetical protein                                                                                                                |
| V2288_x_at         | -1.898394219 | 0.020598917 | Decrease_in_adherent IS91, transposase, truncation                                                                                                       |
| AFFX-r2-Bs-dap-3_a | -1.894845506 | 0.004674732 | Decrease_in_adherent ypjG; hypothetical protein                                                                                                          |
| V3201_s_at         | -1.894570998 | 7.32E-05    | Decrease_in_adherent pmrD; polymyxin resistance protein B                                                                                                |
| V6915_x_at         | -1.89434072  | 0.001074144 | Decrease_in_adherent modA; molybdate transport system periplasmic binding component ; K02020 molybdate transport system substrate-binding protein        |
| EC869_6824_s_at    | -1.893132282 | 0.001700048 | Decrease_in_adherent aconitate hydratase (EC:4.2.1.3); K01681 aconitate hydratase 1 [EC:4.2.1.3]                                                         |
| AFFX-PheX-M_at     | -1.8889448   | 0.009279904 | Decrease_in_adherent pheA; prephenate dehydratase (EC:4.2.1.51); K04518 prephenate dehydratase [EC:4.2.1.51]                                             |
| V6747_s_at         | -1.885387965 | 0.004245038 | Decrease_in_adherent tas; putative aldo-keto reductase                                                                                                   |
| V5725_s_at         | -1.884777084 | 0.04435929  | Decrease_in_adherent endonuclease/exonuclease/phosphatase family protein ; K06896                                                                        |
| M1212_x_at         | -1.884475594 | 0.039902027 | Decrease_in_adherent IS629 transposase orfA                                                                                                              |
| V7066_s_at         | -1.884122275 | 0.004938791 | Decrease_in_adherent hypothetical protein                                                                                                                |
| EC869_7371_s_at    | -1.88205164  | 0.014334183 | Decrease_in_adherent NO_KEGG_DATA                                                                                                                        |
| A0419_s_at         | -1.881366497 | 0.04811299  | Decrease_in_adherent glk; glucokinase (EC:2.7.1.2); K00845 glucokinase [EC:2.7.1.2]                                                                      |
| V0034_s_at         | -1.880948452 | 0.042040542 | Decrease_in_adherent frdC; fumarate reductase subunit C ; K00246 fumarate reductase subunit C [EC:1.3.99.1]                                              |
| b0917_s_at         | -1.878807908 | 0.026543778 | Decrease_in_adherent ycaR; hypothetical protein ; K09791 hypothetical protein                                                                            |
| EC869_6165_s_at    | -1.874701041 | 0.00022407  | Decrease_in_adherent NO_KEGG_DATA                                                                                                                        |
| AFFX-r2-Bs-dap-5_a | -1.871114953 | 0.003029346 | Decrease_in_adherent dapB; dihydrodipicolinate reductase (EC:1.3.1.26); K00215 dihydrodipicolinate reductase [EC:1.3.1.26]                               |
| A1226_s_at         | -1.86998463  | 0.037234246 | Decrease_in_adherent hypothetical protein                                                                                                                |
| c5600_s_at         | -1.868724843 | 0.000529312 | Decrease_in_adherent ybl4; hypothetical protein                                                                                                          |
| V2868_s_at         | -1.865570602 | 0.004964441 | Decrease_in_adherent yggE; hypothetical protein ; K09807 hypothetical protein                                                                            |
| AFFX-DapX-5_at     | -1.864425304 | 0.003610178 | Decrease_in_adherent dapB; dihydrodipicolinate reductase (EC:1.3.1.26); K00215 dihydrodipicolinate reductase [EC:1.3.1.26]                               |
| A3985_s_at         | -1.863092007 | 0.003899668 | Decrease_in_adherent oppD; oligopeptide transporter ATP-binding component ; K02031 peptide/nickel transport system ATP-binding protein                   |
| EC869_8425_s_at    | -1.862924471 | 0.001861174 | Decrease_in_adherent pheT; phenylalanyl-tRNA synthetase subunit beta ; K01890 phenylalanyl-tRNA synthetase beta chain [EC:6.1.1.20]                      |
| EC869_2220_s_at    | -1.862000943 | 0.030496249 | Decrease_in_adherent NO_KEGG_DATA                                                                                                                        |
| EC536_2379_s_at    | -1.861259639 | 0.047334859 | Decrease_in_adherent ygdE; putative RNA 2'-O-ribose methyltransferase ; K06968                                                                           |
| SD1_2443_s_at      | -1.859118459 | 0.021479999 | Decrease_in_adherent udnA; soluble pyridine nucleotide transhydrogenase (EC:1.6.1.1); K00322 NAD(P) transhydrogenase [EC:1.6.1.1]                        |
| A0580_s_at         | -1.855484567 | 0.043049043 | Decrease_in_adherent glyA; serine hydroxymethyltransferase (EC:2.1.2.1); K00600 glycine hydroxymethyltransferase [EC:2.1.2.1]                            |
| A1031_s_at         | -1.853537903 | 0.013844257 | Decrease_in_adherent yggL; hypothetical protein ; K09923 hypothetical protein                                                                            |
| b3609_s_at         | -1.853056209 | 0.021468093 | Decrease_in_adherent secB; preprotein translocase subunit SecB ; K03071 preprotein translocase subunit SecB                                              |
| SS5_3569_s_at      | -1.850876248 | 0.041307425 | Decrease_in_adherent putative enzyme ; K01061 carboxymethylenebutenolidase [EC:3.1.1.45]                                                                 |
| AFFX-DapX-M_at     | -1.844472501 | 0.004804447 | Decrease_in_adherent mgsA; methylglyoxal synthase (EC:4.2.3.3); K01734 methylglyoxal synthase [EC:4.2.3.3]                                               |
| SD1_3424_s_at      | -1.84427894  | 0.035437898 | Decrease_in_adherent asnB; asparagine synthetase B ; K01953 asparagine synthase (glutamine-hydrolysing) [EC:6.3.5.4]                                     |
| A2395_s_at         | -1.843147587 | 0.027634699 | Decrease_in_adherent purA; adenylosuccinate synthetase (EC:6.3.4.4); K01939 adenylosuccinate synthase [EC:6.3.4.4]                                       |
| A2226_s_at         | -1.842910616 | 0.01518046  | Decrease_in_adherent iclR; transcriptional repressor IclR                                                                                                |
| EC869_2518_at      | -1.840128492 | 0.0122147   | Decrease_in_adherent NO_KEGG_DATA                                                                                                                        |
| V2049_s_at         | -1.827139084 | 0.038372115 | Decrease_in_adherent yqjE; hypothetical protein                                                                                                          |
| ECs2281_at         | -1.827025125 | 0.026988545 | Decrease_in_adherent hypothetical protein                                                                                                                |
| EC869_7445_s_at    | -1.826544995 | 0.041850507 | Decrease_in_adherent glnS; glutamyl-tRNA synthetase; K01886 glutamyl-tRNA synthetase [EC:6.1.1.18]                                                       |
| A4684_s_at         | -1.824207458 | 0.002128906 | Decrease_in_adherent NO_KEGG_DATA                                                                                                                        |

|                     |               |             |                                                                                                                                                               |
|---------------------|---------------|-------------|---------------------------------------------------------------------------------------------------------------------------------------------------------------|
| G4205_s_at          | -1.819847323  | 0.026188463 | Decrease_in_adherent NO_KEGG_DATA                                                                                                                             |
| EC869_1162_s_at     | -1.81571835   | 0.040334407 | Decrease_in_adherent fabG; 3-ketoacyl-(acyl-carrier-protein) reductase (EC:1.1.1.100); K00059 3-oxoacyl-[acyl-carrier protein] reductase [EC:1.1.1.100]       |
| V5405_s_at          | -1.811281785  | 0.018525085 | Decrease_in_adherent glgP; glycogen phosphorylase ; K00688 starch phosphorylase [EC:2.4.1.1]                                                                  |
| EC869_0738_s_at     | -1.81125737   | 0.00215314  | Decrease_in_adherent bcsA; cellulose synthase catalytic subunit (EC:2.4.1.12); K00694 cellulose synthase (UDP-forming) [EC:2.4.1.12]                          |
| V7295_x_at          | -1.810421818  | 0.009524873 | Decrease_in_adherent hyaB; hydrogenase 1 large subunit ; K06281 hydrogenase large subunit [EC:1.12.99.6]                                                      |
| A3040_s_at          | -1.810142892  | 0.033575408 | Decrease_in_adherent yaiA; hypothetical protein                                                                                                               |
| W4315_at            | -1.807015153  | 0.030692096 | Decrease_in_adherent yaaB; hypothetical protein                                                                                                               |
| A0712_s_at          | -1.806424244  | 0.049103064 | Decrease_in_adherent ygaG; S-ribosylhomocysteinase ; K07173 S-ribosylhomocysteine lyase [EC:4.4.1.21]                                                         |
| D4711_x_at          | -1.805489896  | 0.026921279 | Decrease_in_adherent IS629; transposase orfA                                                                                                                  |
| F3192_at            | -1.805016278  | 0.021306605 | Decrease_in_adherent NO_KEGG_DATA                                                                                                                             |
| A4654_s_at          | -1.804976829  | 0.025209626 | Decrease_in_adherent hypothetical protein                                                                                                                     |
| V3434_s_at          | -1.803812562  | 0.003563716 | Decrease_in_adherent cysK; cysteine synthase A (EC:2.5.1.47); K01738 cysteine synthase A [EC:2.5.1.47]                                                        |
| A0885_s_at          | -1.802383812  | 0.018831784 | Decrease_in_adherent ygdP; dinucleoside polyphosphate hydrolase ; K08311 putative (di) nucleoside polyphosphate hydrolase [EC:3.6.1.-]                        |
| A3917_s_at          | -1.802063562  | 0.012016433 | Decrease_in_adherent ycgN; hypothetical protein; K09160 hypothetical protein                                                                                  |
| EC869_8302_s_at     | -1.801388498  | 0.015522759 | Decrease_in_adherent NO_KEGG_DATA                                                                                                                             |
| A4152_s_at          | -1.798579295  | 0.012178178 | Decrease_in_adherent hypothetical protein                                                                                                                     |
| V3144_s_at          | -1.797776998  | 0.04854934  | Decrease_in_adherent yfB; hypothetical protein (EC:3.1.3.5); K08722 5'-nucleotidase [EC:3.1.3.5]                                                              |
| A0487_s_at          | -1.796379094  | 0.016777433 | Decrease_in_adherent hypothetical protein                                                                                                                     |
| D3534_s_at          | -1.79211926   | 0.045324424 | Decrease_in_adherent protein CopB                                                                                                                             |
| A2012_s_at          | -1.790969744  | 0.029192864 | Decrease_in_adherent dapF; diaminopimelate epimerase ; K01778 diaminopimelate epimerase [EC:5.1.1.7]                                                          |
| c0751_s_at          | -1.787880859  | 0.040686136 | Decrease_in_adherent NO_KEGG_DATA                                                                                                                             |
| V6719_s_at          | -1.783306276  | 0.035815554 | Decrease_in_adherent DNA-binding transcriptional regulator FruR ; K03435 LacI family transcriptional regulator, fructose operon transcriptional repressor     |
| A0629_s_at          | -1.778487385  | 0.021330073 | Decrease_in_adherent NO_KEGG_DATA                                                                                                                             |
| EC869_3451_s_at     | -1.777321343  | 0.030515286 | Decrease_in_adherent minC; septum formation inhibitor ; K03610 septum site-determining protein MinC                                                           |
| V6217_s_at          | -1.776384928  | 0.028122381 | Decrease_in_adherent sfcA; malate dehydrogenase (EC:1.1.1.38); K00027 malate dehydrogenase (oxaloacetate-decarboxylating) [EC:1.1.1.38]                       |
| 11820_s_at          | -1.776049438  | 0.031575169 | Decrease_in_adherent NO_KEGG_DATA                                                                                                                             |
| A0342_s_at          | -1.775622417  | 0.029735819 | Decrease_in_adherent NAD-binding domain-containing protein ; K07071                                                                                           |
| B0435_s_at          | -1.774923543  | 0.026125081 | Decrease_in_adherent ynfA; transcriptional regulator BolA ; K05527 BolA protein                                                                               |
| SD1_2556_s_at       | -1.770991398  | 0.042510615 | Decrease_in_adherent yihX; phosphatase ; K07025 putative hydrolase of the HAD superfamily                                                                     |
| A1518_s_at          | -1.769199269  | 0.021224967 | Decrease_in_adherent slyD; FKBP-type peptidyl-prolyl cis-trans isomerase (EC:5.2.1.8); K03775 FKBP-type peptidyl-prolyl cis-trans isomerase SlyD [EC:5.2.1.8] |
| EC869_5213_s_at     | -1.767778454  | 0.007066164 | Decrease_in_adherent hypothetical protein                                                                                                                     |
| SD1_2536_s_at       | -1.764243871  | 0.00725255  | Decrease_in_adherent fdoG; formate dehydrogenase-O, major subunit ; K00123 formate dehydrogenase, alpha subunit [EC:1.2.1.2]                                  |
| A1296_s_at          | -1.763173075  | 0.022698542 | Decrease_in_adherent hypothetical protein                                                                                                                     |
| EC869_5452_s_at     | -1.761209759  | 0.015949153 | Decrease_in_adherent yhcK; transcriptional regulator NanR                                                                                                     |
| A0011_s_at          | -1.757627739  | 0.021957895 | Decrease_in_adherent hypothetical protein                                                                                                                     |
| A2500_s_at          | -1.757399372  | 0.007519942 | Decrease_in_adherent hypothetical protein                                                                                                                     |
| SVF_3141_at         | -1.755592343  | 0.027212768 | Decrease_in_adherent yqjC; hypothetical protein                                                                                                               |
| V1348_s_at          | -1.754004865  | 0.01247763  | Decrease_in_adherent NO_KEGG_DATA                                                                                                                             |
| F4327_s_at          | -1.753646589  | 0.002909077 | Decrease_in_adherent hypothetical protein                                                                                                                     |
| A0051_s_at          | -1.752580027  | 0.036358863 | Decrease_in_adherent NAD dependent epimerase/dehydratase family protein                                                                                       |
| V5882_s_at          | -1.749726991  | 0.004410729 | Decrease_in_adherent sodA; superoxide dismutase ; K04564 superoxide dismutase, Fe-Mn family [EC:1.15.1.1]                                                     |
| EC869_0400_s_at     | -1.745356751  | 0.002018133 | Decrease_in_adherent glycogen branching enzyme ; K00700 1,4-alpha-glucan branching enzyme [EC:2.4.1.18]                                                       |
| SB5_4324_s_at       | -1.743674778  | 0.007170009 | Decrease_in_adherent NO_KEGG_DATA                                                                                                                             |
| A4644_s_at          | -1.740459052  | 0.003741808 | Decrease_in_adherent htpX; heat shock protein HtpX ; K03799 heat shock protein HtpX [EC:3.4.24.-]                                                             |
| A1555_s_at          | -1.735672532  | 0.028189098 | Decrease_in_adherent gph; phosphoglycolate phosphatase (EC:3.1.3.18); K01091 phosphoglycolate phosphatase [EC:3.1.3.18]                                       |
| SS5_1387_s_at       | -1.731948931  | 0.041351752 | Decrease_in_adherent hypothetical protein                                                                                                                     |
| A4379_s_at          | -1.729537441  | 0.008755657 | Decrease_in_adherent hypothetical protein                                                                                                                     |
| AFFX-r2-Bs-lys-M_at | -1.72890531   | 0.011367728 | Decrease_in_adherent lysA; diaminopimelate decarboxylase (EC:4.1.1.20); K01586 diaminopimelate decarboxylase [EC:4.1.1.20]                                    |
| V3168_s_at          | -1.728865479  | 0.005170488 | Decrease_in_adherent nuoL; NADH:ubiquinone oxidoreductase, membrane subunit L; K00341 NADH dehydrogenase I subunit L [EC:1.6.5.3]                             |
| S2182_x_at          | -1.727173953  | 0.042192395 | Decrease_in_adherent IS629 orfB                                                                                                                               |
| A3063_s_at          | -1.721533083  | 0.000732487 | Decrease_in_adherent yajD; hypothetical protein                                                                                                               |
| AFFX-LysX-3_at      | -1.7111778318 | 0.010558958 | Decrease_in_adherent lysA; diaminopimelate decarboxylase (EC:4.1.1.20); K01586 diaminopimelate decarboxylase [EC:4.1.1.20]                                    |
| V0946_s_at          | -1.709560305  | 0.003205729 | Decrease_in_adherent NO_KEGG_DATA                                                                                                                             |
| F3897_s_at          | -1.707736756  | 0.03715486  | Decrease_in_adherent mdtE; multidrug efflux system protein MdtE                                                                                               |
| S1912_x_at          | -1.70691936   | 0.016043577 | Decrease_in_adherent hypothetical protein                                                                                                                     |
| A2552_at            | -1.696923307  | 0.024622523 | Decrease_in_adherent N4/N6-methyltransferase family protein                                                                                                   |
| L3255_s_at          | -1.694048344  | 0.038179726 | Decrease_in_adherent cyoA; cytochrome o ubiquinol oxidase subunit II (EC:1.10.3.-); K02297 cytochrome o ubiquinol oxidase subunit II [EC:1.10.3.-]            |
| AFFX-r2-Bs-lys-3_at | -1.691426489  | 0.009424912 | Decrease_in_adherent lysA; diaminopimelate decarboxylase (EC:4.1.1.20); K01586 diaminopimelate decarboxylase [EC:4.1.1.20]                                    |
| SVF_1183_s_at       | -1.69008526   | 0.005862908 | Decrease_in_adherent ycgK; hypothetical protein                                                                                                               |
| A3088_s_at          | -1.689822119  | 0.011035324 | Decrease_in_adherent cyoB; cytochrome o ubiquinol oxidase subunit I ; K02298 cytochrome o ubiquinol oxidase subunit I [EC:1.10.3.-]                           |
| AFFX-LysX-5_at      | -1.689378066  | 0.008258666 | Decrease_in_adherent lysA; diaminopimelate decarboxylase (EC:4.1.1.20); K01586 diaminopimelate decarboxylase [EC:4.1.1.20]                                    |
| A1678_s_at          | -1.681854372  | 0.003206566 | Decrease_in_adherent gor; glutathione reductase (EC:1.8.1.7); K00383 glutathione reductase (NADPH) [EC:1.8.1.7]                                               |
| S1911_x_at          | -1.680713213  | 0.021644239 | Decrease_in_adherent IS629 orfB                                                                                                                               |
| SBO_4372_x_at       | -1.678387877  | 0.000422226 | Decrease_in_adherent IS629 ORF1                                                                                                                               |
| V4146_s_at          | -1.673990246  | 0.003997995 | Decrease_in_adherent pdxJ; pyridoxine 5'-phosphate synthase ; K03474 pyridoxine 5-phosphate synthase [EC:2.6.99.2]                                            |
| F3053_s_at          | -1.672192524  | 0.014695606 | Decrease_in_adherent ycgF; hypothetical protein ; K10026 queuosine biosynthesis protein QueE                                                                  |
| A0665_s_at          | -1.671860603  | 0.006272882 | Decrease_in_adherent IS21 family transposase                                                                                                                  |

|                     |              |             |                                                                                                                                                                                       |
|---------------------|--------------|-------------|---------------------------------------------------------------------------------------------------------------------------------------------------------------------------------------|
| A2183_s_at          | -1.671780393 | 0.003286916 | Decrease_in_adherent yjyD; hypothetical protein                                                                                                                                       |
| A0716_s_at          | -1.669147069 | 0.014818365 | Decrease_in_adherent csrA; carbon storage regulator; K03563 carbon storage regulator                                                                                                  |
| SD1_0131_s_at       | -1.668905075 | 0.041415656 | Decrease_in_adherent secB; preprotein translocase subunit SecB ; K03071 preprotein translocase subunit SecB                                                                           |
| V3318_s_at          | -1.663818488 | 0.026762143 | Decrease_in_adherent rtn; hypothetical protein                                                                                                                                        |
| V5404_s_at          | -1.663106627 | 0.015489683 | Decrease_in_adherent glgA; glycogen synthase GlgA; K00703 starch synthase [EC:2.4.1.21]                                                                                               |
| SS5_4503_s_at       | -1.652495485 | 0.015137522 | Decrease_in_adherent nrdI; ribonucleotide reductase stimulatory protein ; K03647 protein involved in ribonucleotide reduction                                                         |
| B2276_s_at          | -1.650745081 | 0.000742009 | Decrease_in_adherent nuoN; NADH dehydrogenase subunit N (EC:1.6.5.3); K00343 NADH dehydrogenase I subunit N [EC:1.6.5.3]                                                              |
| b0623_s_at          | -1.650085749 | 0.011734494 | Decrease_in_adherent cspE; cold shock protein CspE ; K03704 cold shock protein (beta-ribon, CspA family)                                                                              |
| A3821_s_at          | -1.64722118  | 0.031131057 | Decrease_in_adherent yfcl; hypothetical protein                                                                                                                                       |
| V2860_s_at          | -1.644521103 | 0.017708706 | Decrease_in_adherent pgk; phosphoglycerate kinase ; K00927 phosphoglycerate kinase [EC:2.7.2.3]                                                                                       |
| b4142_s_at          | -1.642615348 | 0.049270199 | Decrease_in_adherent hypothetical protein                                                                                                                                             |
| V6006_s_at          | -1.642566491 | 0.003168539 | Decrease_in_adherent tsx; nucleoside channel ; K05517 nucleoside-specific channel-forming protein                                                                                     |
| SSO_3593_x_at       | -1.642051602 | 0.011951661 | Decrease_in_adherent IS629 ORF2                                                                                                                                                       |
| A3713_s_at          | -1.637359289 | 0.024281638 | Decrease_in_adherent cbpM; chaperone-modulator protein CbpM                                                                                                                           |
| S3755_s_at          | -1.636010699 | 0.028331386 | Decrease_in_adherent cpxP; periplasmic repressor CpxP ; K06006 periplasmic protein CpxP                                                                                               |
| F4930_s_at          | -1.635844125 | 0.04795441  | Decrease_in_adherent NO_KEGG_DATA                                                                                                                                                     |
| b3279_s_at          | -1.634261701 | 0.039582435 | Decrease_in_adherent yrdA; putative transferase                                                                                                                                       |
| M3859_s_at          | -1.631640935 | 0.014049895 | Decrease_in_adherent hypothetical protein                                                                                                                                             |
| A3809_s_at          | -1.630495445 | 0.021615386 | Decrease_in_adherent fabG; 3-ketoacyl-(acyl-carrier-protein) reductase (EC:1.1.1.100); K00059 3-oxoacyl-(acyl-carrier protein) reductase [EC:1.1.1.100]                               |
| D2423_x_at          | -1.63003887  | 0.015423027 | Decrease_in_adherent NO_KEGG_DATA                                                                                                                                                     |
| A2812_s_at          | -1.627842065 | 0.007932303 | Decrease_in_adherent dapD; 2,3,4,5-tetrahydropyridine-2,6-carboxylate N-succinyltransferase (EC:2.3.1.117); K00674 2,3,4,5-tetrahydropyridine-2-carboxylate N-succinyltransferase [EC |
| EC869_4790_s_at     | -1.627001268 | 0.036509177 | Decrease_in_adherent frr; ribosome recycling factor ; K02838 ribosome recycling factor                                                                                                |
| D4055_s_at          | -1.625698595 | 0.025149426 | Decrease_in_adherent parM; plasmid segregation protein ParM                                                                                                                           |
| A2172_at            | -1.624617885 | 0.014961245 | Decrease_in_adherent NO_KEGG_DATA                                                                                                                                                     |
| D1898_s_at          | -1.622879107 | 0.021897915 | Decrease_in_adherent cyoA; cytochrome o ubiquinol oxidase subunit II ; K02297 cytochrome o ubiquinol oxidase subunit II [EC:1.10.3.-]                                                 |
| EC869_0593_s_at     | -1.62069482  | 0.004823418 | Decrease_in_adherent putative Mg(2+) transport ATPase ; K07507 putative Mg2+ transporter-C (MgtC) family protein                                                                      |
| EC869_3959_s_at     | -1.612837418 | 0.042288841 | Decrease_in_adherent putative phage repressor protein CI                                                                                                                              |
| V4772_s_at          | -1.6095039   | 0.00148229  | Decrease_in_adherent hypothetical protein                                                                                                                                             |
| c2650_at            | -1.605519833 | 0.030824947 | Decrease_in_adherent NO_KEGG_DATA                                                                                                                                                     |
| A1221_s_at          | -1.604409579 | 0.034247499 | Decrease_in_adherent icc; cyclic 3',5'-adenosine monophosphate phosphodiesterase ; K03651 Icc protein                                                                                 |
| A2124_s_at          | -1.603275684 | 0.030845343 | Decrease_in_adherent cpxA; two-component sensor protein (EC:2.7.3.-); K07640 two-component system, OmpR family, sensor histidine kinase CpxA [EC:2.7.13.3]                            |
| ECs2477_x_at        | -1.602957172 | 0.006930586 | Decrease_in_adherent IS1203 transposase orfA                                                                                                                                          |
| AFFX-LysX-M_at      | -1.600251527 | 0.007870897 | Decrease_in_adherent lysA; diaminoipimelate decarboxylase (EC:4.1.1.20); K01586 diaminoipimelate decarboxylase [EC:4.1.1.20]                                                          |
| V4620_s_at          | -1.599831574 | 0.017179812 | Decrease_in_adherent htrA; serine endoprotease ; K04771 serine protease Do [EC:3.4.21.107]                                                                                            |
| A3079_s_at          | -1.598268628 | 0.003790576 | Decrease_in_adherent cyoC; cytochrome o ubiquinol oxidase subunit III ; K02299 cytochrome o ubiquinol oxidase subunit III [EC:1.10.3.-]                                               |
| c5509_x_at          | -1.596452062 | 0.019127286 | Decrease_in_adherent NO_KEGG_DATA                                                                                                                                                     |
| G3623_s_at          | -1.595710166 | 0.03830157  | Decrease_in_adherent yjyA; hypothetical protein                                                                                                                                       |
| b3916_s_at          | -1.595589916 | 0.037598594 | Decrease_in_adherent pfkA; 6-phosphofructokinase (EC:2.7.1.11); K00850 6-phosphofructokinase [EC:2.7.1.11]                                                                            |
| V2374_s_at          | -1.595472585 | 0.015026442 | Decrease_in_adherent amyA; cytoplasmic alpha-amylase (EC:3.2.1.1); K01176 alpha-amylase [EC:3.2.1.1]                                                                                  |
| A4535_s_at          | -1.587272373 | 0.018539036 | Decrease_in_adherent hypothetical protein                                                                                                                                             |
| b4039_s_at          | -1.586825102 | 0.023319289 | Decrease_in_adherent ubiC; chorismate pyruvate lyase ; K03181 chorismate--pyruvate lyase [EC:4.1.3.40]                                                                                |
| SD1_3080_s_at       | -1.583910758 | 0.016371148 | Decrease_in_adherent proline dipeptidase ; K01271 X-Pro dipeptidase [EC:3.4.13.9]                                                                                                     |
| V0560_s_at          | -1.581877153 | 0.006400974 | Decrease_in_adherent putative sensor protein                                                                                                                                          |
| EC536_4700_s_at     | -1.577695852 | 0.047825966 | Decrease_in_adherent ycgB; SpoVR family protein                                                                                                                                       |
| V2945_s_at          | -1.575860096 | 0.030814174 | Decrease_in_adherent ygdP; dinucleoside polyphosphate hydrolase ; K08311 putative (di)nucleoside polyphosphate hydrolase [EC:3.6.1.-]                                                 |
| SS5_2456_s_at       | -1.573497944 | 0.019498691 | Decrease_in_adherent smpA; hypothetical protein ; K06186 small protein A                                                                                                              |
| AFFX-r2-Bs-lys-5_at | -1.56983111  | 0.004402931 | Decrease_in_adherent lysA; diaminoipimelate decarboxylase (EC:4.1.1.20); K01586 diaminoipimelate decarboxylase [EC:4.1.1.20]                                                          |
| A2849_s_at          | -1.563041882 | 0.036870172 | Decrease_in_adherent yaeD; D,D-heptose 1,7-bisphosphate phosphatase ; K03273 D-glycero-D-manno-heptose 1,7-bisphosphate phosphatase [EC:3.1.3.-]                                      |
| SD1_1883_s_at       | -1.561483799 | 0.035170717 | Decrease_in_adherent lipA; lipoyl synthase ; K03644 lipoyl acid synthetase [EC:2.8.1.8]                                                                                               |
| A3866_s_at          | -1.559213273 | 0.010528623 | Decrease_in_adherent protein kinase domain-containing protein ; K08884 serine/threonine protein kinase, bacterial [EC:2.7.11.1]                                                       |
| H4060_s_at          | -1.557133001 | 0.03538047  | Decrease_in_adherent NO_KEGG_DATA                                                                                                                                                     |
| SDY_2662_s_at       | -1.552360327 | 0.04404965  | Decrease_in_adherent hypothetical protein                                                                                                                                             |
| Z3923_x_at          | -1.550990735 | 0.017957594 | Decrease_in_adherent putative IS629 transposase OrfB                                                                                                                                  |
| V3045_s_at          | -1.55058202  | 0.032721669 | Decrease_in_adherent vacJ; lipoprotein precursor ; K04754 lipoprotein                                                                                                                 |
| A3822_s_at          | -1.550546856 | 0.033861273 | Decrease_in_adherent ycfM; hypothetical protein ; K07337 hypothetical protein                                                                                                         |
| V6706_s_at          | -1.548788833 | 0.047645724 | Decrease_in_adherent leuA; 2-isopropylmalate synthase (EC:2.3.3.13); K01649 2-isopropylmalate synthase [EC:2.3.3.13]                                                                  |
| SSO_P039_x_at       | -1.543142509 | 0.003814142 | Decrease_in_adherent hypothetical protein                                                                                                                                             |
| A4656_s_at          | -1.540912781 | 0.01890088  | Decrease_in_adherent yobA; hypothetical protein; K07156                                                                                                                               |
| A4075_s_at          | -1.539788736 | 0.047395839 | Decrease_in_adherent hypothetical protein                                                                                                                                             |
| A3928_s_at          | -1.538339869 | 0.046967125 | Decrease_in_adherent hypothetical protein                                                                                                                                             |
| M4990_s_at          | -1.536805269 | 0.009281114 | Decrease_in_adherent trxB; thioredoxin reductase ; K00384 thioredoxin reductase (NADPH) [EC:1.8.1.9]                                                                                  |
| EC869_5683_s_at     | -1.535392571 | 6.23E-05    | Decrease_in_adherent hypothetical protein                                                                                                                                             |
| D1931_s_at          | -1.535370366 | 0.04336521  | Decrease_in_adherent nlpD; lipoprotein NlpD ; K06194 lipoprotein NlpD                                                                                                                 |
| b4135_s_at          | -1.53471194  | 0.02780162  | Decrease_in_adherent yjyC; hypothetical protein                                                                                                                                       |
| ECs2779_x_at        | -1.531609238 | 0.031344227 | Decrease_in_adherent amn; AMP nucleosidase; K01241 AMP nucleosidase [EC:3.2.2.4]                                                                                                      |
| V7078_s_at          | -1.530046411 | 0.003865161 | Decrease_in_adherent yebZ; putative inner membrane protein; K07245 putative copper resistance protein D                                                                               |
| A3296_s_at          | -1.528419726 | 0.00048388  | Decrease_in_adherent gtlL; glutamate/aspartate ABC transporter, ATP-binding protein ; K10004 glutamate/aspartate transport system ATP-binding protein [EC:3.6.3.-]                    |

|                 |              |             |                                                                                                                                                                                  |
|-----------------|--------------|-------------|----------------------------------------------------------------------------------------------------------------------------------------------------------------------------------|
| G3816_s_at      | -1.524898223 | 0.007923156 | Decrease_in_adherent cyoB; cytochrome o ubiquinol oxidase, subunit I [EC:1.10.3.-]; K02298 cytochrome o ubiquinol oxidase subunit I [EC:1.10.3.-]                                |
| b1745_s_at      | -1.51887948  | 0.001173345 | Decrease_in_adherent astB; succinylarginine dihydrolase (EC:3.-.-.-); K01484 succinylarginine dihydrolase [EC:3.5.3.23]                                                          |
| F3246_s_at      | -1.51077535  | 0.020590062 | Decrease_in_adherent hypothetical protein                                                                                                                                        |
| b2124_s_at      | -1.510169956 | 0.043244412 | Decrease_in_adherent yehS; hypothetical protein                                                                                                                                  |
| SBO_1156_s_at   | -1.508120279 | 0.018577398 | Decrease_in_adherent yebG; DNA damage-inducible protein YebG; K09918 hypothetical protein                                                                                        |
| A2182_s_at      | -1.505320548 | 0.018097182 | Decrease_in_adherent yjC; DNA-binding transcriptional repressor FabR                                                                                                             |
| V1254_s_at      | -1.503088089 | 0.021134836 | Decrease_in_adherent osmY; periplasmic protein; K04065 hyperosmotically inducible periplasmic protein                                                                            |
| EC869_6281_s_at | -1.499579408 | 0.005490735 | Decrease_in_adherent eno; phosphopyruvate hydratase; K01689 enolase [EC:4.2.1.11]                                                                                                |
| b4255_x_at      | -1.493333797 | 0.025453378 | Decrease_in_adherent yjgD; hypothetical protein; K09893 hypothetical protein                                                                                                     |
| A4012_at        | -1.489935894 | 0.035162438 | Decrease_in_adherent putative phage repressor protein CI                                                                                                                         |
| A0435_s_at      | -1.488907083 | 0.019114014 | Decrease_in_adherent cysteine synthase A; K01738 cysteine synthase A [EC:2.5.1.47]                                                                                               |
| V2207_x_at      | -1.484167971 | 0.02076926  | Decrease_in_adherent IS629 ORF2                                                                                                                                                  |
| SS5_4135_s_at   | -1.482965839 | 0.005782286 | Decrease_in_adherent mhpR; DNA-binding transcriptional activator MhpR, 3HPP-binding; K05818 IclR family transcriptional regulator, mhp operon transcriptional activator          |
| A1943_s_at      | -1.479547487 | 0.006318519 | Decrease_in_adherent FOF1 ATP synthase subunit C; K02110 F-type H+-transporting ATPase subunit c [EC:3.6.3.14]                                                                   |
| ECs2526_s_at    | -1.478533151 | 0.019726563 | Decrease_in_adherent hypothetical protein                                                                                                                                        |
| EC869_2692_s_at | -1.478438956 | 0.037097517 | Decrease_in_adherent NO_KEGG_DATA                                                                                                                                                |
| A1783_s_at      | -1.467483857 | 0.000204945 | Decrease_in_adherent putative glutathione S-transferase (EC:2.5.1.18)                                                                                                            |
| SD1_3177_s_at   | -1.467247431 | 0.042537604 | Decrease_in_adherent purI; formyltetrahydrofolate deformylase (EC:3.5.1.10); K01433 formyltetrahydrofolate deformylase [EC:3.5.1.10]                                             |
| b3054_s_at      | -1.464503621 | 0.046412408 | Decrease_in_adherent ygiF; predicted adenylate cyclase                                                                                                                           |
| A4727_s_at      | -1.460278673 | 0.011209562 | Decrease_in_adherent yecA; hypothetical protein; K07039                                                                                                                          |
| EC869_4608_x_at | -1.460045244 | 0.007153042 | Decrease_in_adherent pgm; phosphoglucomutase (EC:5.4.2.2); K01835 phosphoglucomutase [EC:5.4.2.2]                                                                                |
| D1412_s_at      | -1.459728437 | 0.024064235 | Decrease_in_adherent putative 60 kDa chaperonin                                                                                                                                  |
| V1302_s_at      | -1.455856196 | 0.032842094 | Decrease_in_adherent putative ABC transporter ATP-binding protein                                                                                                                |
| SB5_1478_x_at   | -1.45360988  | 0.031472658 | Decrease_in_adherent insertion sequence 2 OrfA protein                                                                                                                           |
| SD1_1429_s_at   | -1.448451841 | 0.015899977 | Decrease_in_adherent flagL; flagellar hook-associated protein flagL; K02397 flagellar hook-associated protein 3 flagL                                                            |
| SSO_2654_x_at   | -1.446375653 | 0.000825622 | Decrease_in_adherent IS629 ORF2; K07497 putative transposase                                                                                                                     |
| EC869_8104_s_at | -1.445291119 | 0.035164636 | Decrease_in_adherent guaA; GMP synthase (EC:6.3.5.2); K01951 GMP synthase (glutamine-hydrolysing) [EC:6.3.5.2]                                                                   |
| A2067_s_at      | -1.443693634 | 0.027210843 | Decrease_in_adherent hemN; coproporphyrinogen III oxidase (EC:1.3.99.22); K02495 oxygen-independent coproporphyrinogen III oxidase [EC:1.3.99.22]                                |
| V0762_s_at      | -1.443354052 | 0.047684145 | Decrease_in_adherent pepQ; proline dipeptidase; K01271 X-Pro dipeptidase [EC:3.4.13.9]                                                                                           |
| F4838_s_at      | -1.443097267 | 0.031106972 | Decrease_in_adherent pyrI; aspartate carbamoyltransferase regulatory subunit; K00610 aspartate carbamoyltransferase regulatory subunit                                           |
| c1749_s_at      | -1.442104479 | 0.017447754 | Decrease_in_adherent tetraatricopeptide repeat protein                                                                                                                           |
| V0008_x_at      | -1.44040348  | 0.039544671 | Decrease_in_adherent def; peptide deformylase (EC:3.5.1.88); K01462 [EC:3.5.1.88]                                                                                                |
| SB5_4103_s_at   | -1.440200385 | 0.001953621 | Decrease_in_adherent ybgF; tol-pal system protein YbgF                                                                                                                           |
| V2817_s_at      | -1.431985941 | 0.021186907 | Decrease_in_adherent speA; arginine decarboxylase; K01585 arginine decarboxylase [EC:4.1.1.19]                                                                                   |
| V2980_s_at      | -1.42962984  | 0.030492988 | Decrease_in_adherent aminotransferase; K10907 aminotransferase [EC:2.6.1.-]                                                                                                      |
| c2115_s_at      | -1.427099487 | 0.030386957 | Decrease_in_adherent infC; translation initiation factor IF-3; K02520 translation initiation factor IF-3                                                                         |
| b2573_s_at      | -1.42199353  | 0.047787676 | Decrease_in_adherent rpoE; RNA polymerase sigma factor RpoE; K03088 RNA polymerase sigma-70 factor, ECF subfamily                                                                |
| V0207_s_at      | -1.420696556 | 0.030507528 | Decrease_in_adherent NO_KEGG_DATA                                                                                                                                                |
| EC869_7375_s_at | -1.420503017 | 0.005286061 | Decrease_in_adherent ppiD; peptidyl-prolyl cis-trans isomerase D; K03770 peptidyl-prolyl cis-trans isomerase D [EC:5.2.1.8]                                                      |
| SD1_1706_s_at   | -1.419411358 | 0.000146755 | Decrease_in_adherent secF; preprotein translocase subunit SecF; K03074 preprotein translocase subunit SecF                                                                       |
| SD1_2252_s_at   | -1.413057302 | 0.005303127 | Decrease_in_adherent hisQ; histidine transport system permease protein; K10016 histidine transport system permease protein                                                       |
| c1536_x_at      | -1.409936769 | 0.006078931 | Decrease_in_adherent bet; recombination protein Bet                                                                                                                              |
| A2185_s_at      | -1.408373129 | 0.028699925 | Decrease_in_adherent btuB; vitamin B12/cobalamin outer membrane transporter; K02014 iron complex outermembrane receptor protein                                                  |
| c5177_x_at      | -1.407755451 | 0.031076024 | Decrease_in_adherent transposase ORF A, IS629                                                                                                                                    |
| EC869_2361_s_at | -1.406852926 | 0.025453314 | Decrease_in_adherent lexA; LexA repressor (EC:3.4.21.88); K01356 repressor LexA [EC:3.4.21.88]                                                                                   |
| V5187_s_at      | -1.40383925  | 0.012234886 | Decrease_in_adherent bcsE; cellulose biosynthesis protein BcsE                                                                                                                   |
| EC869_0979_s_at | -1.402132737 | 0.010363394 | Decrease_in_adherent acetate kinase; K00925 acetate kinase [EC:2.7.2.1]                                                                                                          |
| SB5_4770_x_at   | -1.398153209 | 0.005889592 | Decrease_in_adherent fimD; outer membrane usher protein FimD; K07347 outer membrane usher protein                                                                                |
| SB5_4462_at     | -1.39711313  | 0.020365859 | Decrease_in_adherent NO_KEGG_DATA                                                                                                                                                |
| V1769_s_at      | -1.396006868 | 0.035974674 | Decrease_in_adherent pepN; aminopeptidase N; K01256 aminopeptidase N [EC:3.4.11.2]                                                                                               |
| SBO_0235_x_at   | -1.395243338 | 0.006898123 | Decrease_in_adherent hypothetical protein                                                                                                                                        |
| EC869_6334_s_at | -1.395106566 | 0.011556688 | Decrease_in_adherent amyA; cytoplasmic alpha-amylase; K01176 alpha-amylase [EC:3.2.1.1]                                                                                          |
| K4902_x_at      | -1.393813917 | 0.012353786 | Decrease_in_adherent yhiH; putative ATP-binding component of a transport system, fragment 1; K01990 ABC-2 type transport system ATP-binding protein; K01992 ABC-2 type transport |
| F3392_s_at      | -1.383364505 | 0.022367195 | Decrease_in_adherent mdaB; modulator of drug activity B; K03923 modulator of drug activity B                                                                                     |
| A1670_s_at      | -1.38293214  | 0.010058821 | Decrease_in_adherent pyridine nucleotide-disulfide oxidoreductase family protein; K07007                                                                                         |
| EC869_2547_s_at | -1.381304105 | 0.011332617 | Decrease_in_adherent ruvA; Holliday junction DNA helicase RuvA; K03550 holliday junction DNA helicase RuvA                                                                       |
| A3085_s_at      | -1.374164549 | 3.27E-05    | Decrease_in_adherent cyoE; protoheme IX farnesyltransferase; K02301 protoheme IX farnesyltransferase [EC:2.5.1.-]                                                                |
| ECP_2591_s_at   | -1.373481127 | 0.042478687 | Decrease_in_adherent transposase                                                                                                                                                 |
| EC869_4505_s_at | -1.365924141 | 0.014528904 | Decrease_in_adherent gpsA; NAD(P)H-dependent glycerol-3-phosphate dehydrogenase (EC:1.1.1.94); K00057 glycerol-3-phosphate dehydrogenase (NAD(P)+) [EC:1.1.1.94]                 |
| D1411_s_at      | -1.365530701 | 0.037049931 | Decrease_in_adherent ParA protein homolog; K03496 chromosome partitioning protein                                                                                                |
| A1230_s_at      | -1.362502346 | 0.000589976 | Decrease_in_adherent hypothetical protein                                                                                                                                        |
| SB5_4783_x_at   | -1.351889491 | 0.025194214 | Decrease_in_adherent IS629 transposase orfB                                                                                                                                      |
| c0884_s_at      | -1.349696425 | 0.030553778 | Decrease_in_adherent ybiB; uncharacterized protein YbiB                                                                                                                          |
| V5406_s_at      | -1.346712963 | 0.022162399 | Decrease_in_adherent glgP; glycogen phosphorylase; K00688 starch phosphorylase [EC:2.4.1.1]                                                                                      |
| A4299_at        | -1.344074215 | 0.014885252 | Decrease_in_adherent hypothetical protein                                                                                                                                        |
| EC869_0211_s_at | -1.338164114 | 0.011917927 | Decrease_in_adherent fkpA; FKBP-type peptidyl-prolyl cis-trans isomerase; K03772 FKBP-type peptidyl-prolyl cis-trans isomerase FkpA [EC:5.2.1.8]                                 |
| V1568_s_at      | -1.337356007 | 0.025929939 | Decrease_in_adherent ispF; 2-C-methyl-D-erythritol 2,4-cyclodiphosphate synthase; K01770 2-C-methyl-D-erythritol 2,4-cyclodiphosphate synthase [EC:4.6.1.12]                     |

|                  |              |             |                                                                                                                                                                                                  |
|------------------|--------------|-------------|--------------------------------------------------------------------------------------------------------------------------------------------------------------------------------------------------|
| V3830_s_at       | -1.331354481 | 0.002697012 | Decrease_in_adherent cytosine deaminase ; K01485 cytosine deaminase [EC:3.5.4.1]                                                                                                                 |
| EC536_2323_s_at  | -1.327955889 | 0.01129523  | Decrease_in_adherent hypothetical protein                                                                                                                                                        |
| APECO1_956_s_at  | -1.306794872 | 0.037883746 | Decrease_in_adherent uvrY, sirA; response regulator ; K07689 two-component system, NarL family, invasion response regulator UvrY                                                                 |
| A1640_s_at       | -1.305986962 | 0.048358353 | Decrease_in_adherent ftsX; cell division protein FtsX ; K09811 cell division transport system permease protein                                                                                   |
| A4682_s_at       | -1.303716026 | 0.02022077  | Decrease_in_adherent aspS; aspartyl-tRNA synthetase (EC:6.1.1.12); K01876 aspartyl-tRNA synthetase [EC:6.1.1.12]                                                                                 |
| H3813_s_at       | -1.302826563 | 0.002741457 | Decrease_in_adherent rbsR; transcriptional repressor RbsR ; K02529 LacI family transcriptional regulator                                                                                         |
| SD1_0278_s_at    | -1.291319554 | 0.024803611 | Decrease_in_adherent pstS; phosphate ABC transporter periplasmic substrate-binding protein PstS ; K02040 phosphate transport system substrate-binding protein                                    |
| ECP_0709_s_at    | -1.289100384 | 0.023739923 | Decrease_in_adherent pgm; phosphoglucomutase ; K01835 phosphoglucomutase [EC:5.4.2.2]                                                                                                            |
| K3168_x_at       | -1.285848038 | 0.015143245 | Decrease_in_adherent hypothetical protein                                                                                                                                                        |
| EC869_6288_s_at  | -1.285198838 | 0.005804796 | Decrease_in_adherent relA; GDP/GTP pyrophosphokinase ; K00951 GTP pyrophosphokinase [EC:2.7.6.5]                                                                                                 |
| F1250_s_at       | -1.283655312 | 0.010275421 | Decrease_in_adherent ycgJ; hypothetical protein                                                                                                                                                  |
| pC15-1a_040_x_at | -1.281670044 | 0.001491861 | Decrease_in_adherent plasmid partition protein B ; K03497 chromosome partitioning protein, ParB family                                                                                           |
| A1805_s_at       | -1.2816124   | 0.031989663 | Decrease_in_adherent grxC; glutaredoxin 3 ; K03676 glutaredoxin 3                                                                                                                                |
| b3736_s_at       | -1.279519423 | 0.017733336 | Decrease_in_adherent atpF; F0F1 ATP synthase subunit B (EC:3.6.3.14); K02109 F-type H <sup>+</sup> -transporting ATPase subunit b [EC:3.6.3.14]                                                  |
| A1018_s_at       | -1.275214581 | 0.039801007 | Decrease_in_adherent gshB; glutathione synthetase (EC:6.3.2.3); K01920 glutathione synthase [EC:6.3.2.3]                                                                                         |
| EC869_0204_s_at  | -1.272152741 | 0.010871969 | Decrease_in_adherent fusA; elongation factor G ; K02355 elongation factor EF-G [EC:3.6.5.3]                                                                                                      |
| A0224_s_at       | -1.271766076 | 0.048698638 | Decrease_in_adherent yejG; hypothetical protein                                                                                                                                                  |
| J5322_s_at       | -1.267803012 | 0.008621137 | Decrease_in_adherent cell wall-associated hydrolase                                                                                                                                              |
| SBO_2370_x_at    | -1.265733771 | 0.020597163 | Decrease_in_adherent insertion sequence 2 OrfA protein                                                                                                                                           |
| A4605_s_at       | -1.265143875 | 0.001288875 | Decrease_in_adherent yeaP; hypothetical protein ; K13069 diguanylate cyclase [EC:2.7.7.65]                                                                                                       |
| c5616_s_at       | -1.262898216 | 8.60E-05    | Decrease_in_adherent cell wall-associated hydrolase                                                                                                                                              |
| SD1_1970_s_at    | -1.261872421 | 0.04518889  | Decrease_in_adherent ylaB; hypothetical protein                                                                                                                                                  |
| A0227_at         | -1.255426525 | 0.044483742 | Decrease_in_adherent NO_KEGG_DATA                                                                                                                                                                |
| b0407_s_at       | -1.254204859 | 0.008134519 | Decrease_in_adherent yajC; preprotein translocase subunit YajC ; K03210 preprotein translocase subunit YajC                                                                                      |
| SD1_3091_s_at    | -1.252650513 | 0.008273656 | Decrease_in_adherent ubiB, aarF, yigQ, yigR; putative ubiquinone biosynthesis protein UbiB ; K03688 ubiquinone biosynthesis protein                                                              |
| A3567_s_at       | -1.248966503 | 0.042724999 | Decrease_in_adherent lraA; outer-membrane lipoprotein carrier protein ; K03634 outer membrane lipoproteins carrier protein                                                                       |
| SDY_2200_s_at    | -1.24504551  | 0.035837048 | Decrease_in_adherent hypothetical protein                                                                                                                                                        |
| A0366_s_at       | -1.240573469 | 0.034740961 | Decrease_in_adherent putative transporting ATPase ; K09906 hypothetical protein                                                                                                                  |
| A0323_s_at       | -1.240034106 | 0.043671698 | Decrease_in_adherent nuoE; NADH dehydrogenase subunit E (EC:1.6.5.3); K00334 NADH dehydrogenase I subunit E [EC:1.6.5.3]                                                                         |
| V0063_s_at       | -1.239029462 | 0.024052252 | Decrease_in_adherent putative transcriptional regulator                                                                                                                                          |
| A0328_s_at       | -1.237755806 | 0.035001069 | Decrease_in_adherent aminotransferase AlaT ; K10907 aminotransferase [EC:2.6.1.-]                                                                                                                |
| SD1_1241_s_at    | -1.236605918 | 0.02866693  | Decrease_in_adherent dapA; dihydrodipicolinate synthase (EC:4.2.1.52); K01714 dihydrodipicolinate synthase [EC:4.2.1.52]                                                                         |
| SD1_3011_s_at    | -1.231875665 | 0.003562658 | Decrease_in_adherent valS; valyl-tRNA synthetase (EC:6.1.1.9); K01873 valyl-tRNA synthetase [EC:6.1.1.9]                                                                                         |
| A2456_s_at       | -1.227519074 | 0.04963947  | Decrease_in_adherent mpl; UDP-N-acetylmuramate:L-alanyl-gamma-D-glutamyl-meso-diaminopimelate ligase; K02558 UDP-N-acetylmuramate: L-alanyl-gamma-D-glutamyl-meso-diaminopimelate ligase; K02558 |
| UTI89_C0218_s_at | -1.224819513 | 9.98E-05    | Decrease_in_adherent NO_KEGG_DATA                                                                                                                                                                |
| SD1_1239_s_at    | -1.222151597 | 0.028859947 | Decrease_in_adherent nlpB; lipoprotein ; K07287 lipoprotein-34                                                                                                                                   |
| V5408_s_at       | -1.221018034 | 0.008726104 | Decrease_in_adherent NO_KEGG_DATA                                                                                                                                                                |
| V7280_s_at       | -1.217271704 | 0.020630781 | Decrease_in_adherent yccZ; putative function in exopolysaccharide production ; K01991 polysaccharide export outer membrane protein                                                               |
| K3747_x_at       | -1.214837915 | 0.035111903 | Decrease_in_adherent putative plasmid SOS inhibition protein B                                                                                                                                   |
| V6012_s_at       | -1.209832758 | 0.036870415 | Decrease_in_adherent secF; preprotein translocase subunit SecF ; K03074 preprotein translocase subunit SecF                                                                                      |
| SB5_4341_s_at    | -1.20953701  | 0.024819739 | Decrease_in_adherent ftsA; cell division protein FtsA ; K03590 cell division protein FtsA                                                                                                        |
| V4018_s_at       | -1.207743226 | 0.02868012  | Decrease_in_adherent aceE; pyruvate dehydrogenase subunit E1 ; K00163 pyruvate dehydrogenase E1 component [EC:1.2.4.1]                                                                           |
| A2189_s_at       | -1.207063989 | 0.004475527 | Decrease_in_adherent murB; UDP-N-acetylpyruvoylglucosamine reductase (EC:1.1.1.158); K00075 UDP-N-acetylmuramate dehydrogenase [EC:1.1.1.158]                                                    |
| A2633_s_at       | -1.203961097 | 0.028082637 | Decrease_in_adherent putative ABC transporter ATP-binding protein                                                                                                                                |
| A0532_s_at       | -1.198236944 | 0.016347783 | Decrease_in_adherent NO_KEGG_DATA                                                                                                                                                                |
| EC869_1180_s_at  | -1.192527911 | 0.018172703 | Decrease_in_adherent glucose-specific PTS system IIB components ; K02778 PTS system, glucose-specific IIB component [EC:2.7.1.69]; K02779 PTS system, glucose-specific IIC component             |
| A2593_s_at       | -1.188631918 | 0.045690092 | Decrease_in_adherent yjiX; hypothetical protein                                                                                                                                                  |
| c2804_s_at       | -1.18655182  | 0.020484762 | Decrease_in_adherent menC; O-succinylbenzoate synthase (EC:4.2.1.-); K02549 O-succinylbenzoate synthase [EC:4.2.1.113]                                                                           |
| A1888_s_at       | -1.186285494 | 0.012209283 | Decrease_in_adherent lbpA; heat shock protein lbpA ; K04080 molecular chaperone lbpA                                                                                                             |
| M1538_s_at       | -1.185192232 | 0.04889713  | Decrease_in_adherent cysS; cysteinyl-tRNA synthetase ; K01883 cysteinyl-tRNA synthetase [EC:6.1.1.16]                                                                                            |
| EC536_6829_s_at  | -1.184742037 | 0.019887824 | Decrease_in_adherent nadD; nicotinic acid mononucleotide adenyltransferase (EC:2.7.7.18); K00969 nicotinate-nucleotide adenyltransferase [EC:2.7.7.18]                                           |
| V4290_s_at       | -1.184169728 | 0.025141091 | Decrease_in_adherent cbpA; curved DNA-binding protein CbpA ; K05516 curved DNA-binding protein                                                                                                   |
| A0687_at         | -1.18395379  | 0.028117657 | Decrease_in_adherent NO_KEGG_DATA                                                                                                                                                                |
| b1207_s_at       | -1.180115945 | 0.032652105 | Decrease_in_adherent prsA; ribose-phosphate pyrophosphokinase (EC:2.7.6.1); K00948 ribose-phosphate pyrophosphokinase [EC:2.7.6.1]                                                               |
| SD1_2374_s_at    | -1.176430564 | 0.040151797 | Decrease_in_adherent recA; recombinase A ; K03553 recombination protein RecA                                                                                                                     |
| A2921_at         | -1.176074691 | 0.012303902 | Decrease_in_adherent hypothetical protein                                                                                                                                                        |
| V1059_s_at       | -1.174475239 | 0.002871705 | Decrease_in_adherent acrB; acridine efflux pump ; K03296 hydrophobic/amphiphilic exporter-1 (mainly G- bacteria), HAE1 family                                                                    |
| V2373_s_at       | -1.171787672 | 0.011963839 | Decrease_in_adherent NO_KEGG_DATA                                                                                                                                                                |
| V5920_s_at       | -1.16969745  | 0.035728952 | Decrease_in_adherent formate dehydrogenase-O subunit gamma ; K00127 formate dehydrogenase, gamma subunit [EC:1.2.1.2]                                                                            |
| A2186_s_at       | -1.158089431 | 0.043946563 | Decrease_in_adherent murI; glutamate racemase (EC:5.1.1.3); K01776 glutamate racemase [EC:5.1.1.3]                                                                                               |
| A1495_s_at       | -1.15335665  | 0.016358397 | Decrease_in_adherent rpsQ; 30S ribosomal protein S17; K02961 small subunit ribosomal protein S17                                                                                                 |
| c3026_s_at       | -1.153052738 | 0.01645207  | Decrease_in_adherent guaA; GMP synthase (EC:6.3.5.2); K01951 GMP synthase (glutamine-hydrolysing) [EC:6.3.5.2]                                                                                   |
| A2102_s_at       | -1.149508332 | 0.038268924 | Decrease_in_adherent fdoH; formate dehydrogenase-O, iron-sulfur subunit ; K00124 formate dehydrogenase, beta subunit [EC:1.2.1.2]                                                                |
| SFV_1073_x_at    | -1.147976067 | 0.028330322 | Decrease_in_adherent IS629 ORF2                                                                                                                                                                  |
| APECO1_3635_s_at | -1.144925847 | 0.008725271 | Decrease_in_adherent recJ; ssDNA exonuclease RecJ; K07462 single-stranded-DNA-specific exonuclease [EC:3.1.-.-]                                                                                  |
| F4817_s_at       | -1.144024036 | 0.01589836  | Decrease_in_adherent ppa; inorganic pyrophosphatase (EC:3.6.1.1); K01507 inorganic pyrophosphatase [EC:3.6.1.1]                                                                                  |
| SFV_2993_s_at    | -1.141652569 | 0.000515731 | Decrease_in_adherent speA; arginine decarboxylase (EC:4.1.1.19); K01585 arginine decarboxylase [EC:4.1.1.19]                                                                                     |

|                  |              |             |                                                                                                                                                      |
|------------------|--------------|-------------|------------------------------------------------------------------------------------------------------------------------------------------------------|
| A1049_s_at       | -1.133137348 | 0.008863798 | Decrease_in_adherent putative PstII restriction-modification enzyme Res subunit                                                                      |
| b2217_s_at       | -1.127561738 | 0.031713943 | Decrease_in_adherent transcriptional regulator RcsB ; K07687 two-component system, NarL family, capsular synthesis response regulator RcsB           |
| A2745_s_at       | -1.121474337 | 0.045076678 | Decrease_in_adherent yacF; hypothetical protein                                                                                                      |
| A4745_s_at       | -1.121179264 | 0.027891035 | Decrease_in_adherent flit; flagellar biosynthesis protein Flit; K02423 flagellar protein Flit                                                        |
| A2000_s_at       | -1.11649128  | 0.041494362 | Decrease_in_adherent hemY; putative protoheme IX biogenesis protein ; K02498 HemY protein                                                            |
| b0474_s_at       | -1.110671965 | 0.041891827 | Decrease_in_adherent NO_KEGG_DATA                                                                                                                    |
| SD1_3380_s_at    | -1.107736838 | 0.009370998 | Decrease_in_adherent rlpB; LPS-assembly lipoprotein RlpB ; K03643 LPS-assembly lipoprotein                                                           |
| b3204_s_at       | -1.107175628 | 0.030873178 | Decrease_in_adherent ptsN; PTS IIA-like nitrogen-regulatory protein PtsN ; K02806 PTS system, nitrogen regulatory IIA component [EC:2.7.1.69]        |
| V2369_s_at       | -1.105707978 | 0.001730677 | Decrease_in_adherent flid; flagellar capping protein; K02407 flagellar hook-associated protein 2                                                     |
| SB5_0200_s_at    | -1.103427943 | 0.001341871 | Decrease_in_adherent NO_KEGG_DATA                                                                                                                    |
| A4513_s_at       | -1.095875943 | 0.0291861   | Decrease_in_adherent ydiV; hypothetical protein                                                                                                      |
| A4558_s_at       | -1.094820461 | 0.021268319 | Decrease_in_adherent NO_KEGG_DATA                                                                                                                    |
| S1960_x_at       | -1.093445519 | 0.044781995 | Decrease_in_adherent IS629 ORF2                                                                                                                      |
| A3535_s_at       | -1.084375197 | 0.019636655 | Decrease_in_adherent artM; arginine transporter permease subunit ArtM ; K09998 arginine transport system permease protein                            |
| F3812_s_at       | -1.081404065 | 0.005873056 | Decrease_in_adherent rsmD; 16S rRNA m(2)G966-methyltransferase [EC:2.1.1.-]; K08316 ribosomal RNA small subunit methyltransferase D [EC:2.1.1.52]    |
| SS5_4191_s_at    | -1.078941298 | 0.011148841 | Decrease_in_adherent putative oxidoreductase; K06969 putative SAM-dependent methyltransferase                                                        |
| SF1693_s_at      | -1.068724835 | 0.040987659 | Decrease_in_adherent IS-10 transposase                                                                                                               |
| EC869_4438_s_at  | -1.067995433 | 0.026498112 | Decrease_in_adherent NO_KEGG_DATA                                                                                                                    |
| V1446_s_at       | -1.064455253 | 0.032967974 | Decrease_in_adherent threonyl-tRNA synthetase ; K01868 threonyl-tRNA synthetase [EC:6.1.1.3]                                                         |
| A1404_s_at       | -1.055868088 | 0.048184904 | Decrease_in_adherent hypothetical protein ; K06958                                                                                                   |
| A3617_s_at       | -1.054364814 | 0.042056488 | Decrease_in_adherent smtA; putative metallothionein SmtA ; K06219 S-adenosylmethionine-dependent methyltransferase                                   |
| M4031_at         | -1.052528794 | 0.020328393 | Decrease_in_adherent NO_KEGG_DATA                                                                                                                    |
| b1717_s_at       | -1.050146756 | 0.028233906 | Decrease_in_adherent hypothetical protein                                                                                                            |
| F4711_s_at       | -1.046763503 | 0.001206459 | Decrease_in_adherent DNA methylase N-4/N-6 (EC:2.1.1.72)                                                                                             |
| A2730_s_at       | -1.045712913 | 0.00799185  | Decrease_in_adherent NO_KEGG_DATA                                                                                                                    |
| b1957_s_at       | -1.043705261 | 0.033009947 | Decrease_in_adherent hypothetical protein                                                                                                            |
| J4318_at         | -1.043694755 | 0.003041633 | Decrease_in_adherent TrbC ; K12217 intracellular multiplication protein lcmO                                                                         |
| V2818_s_at       | -1.040292915 | 0.017654439 | Decrease_in_adherent arginine decarboxylase ; K01585 arginine decarboxylase [EC:4.1.1.19]                                                            |
| EC869_1425_s_at  | -1.038337703 | 0.007081748 | Decrease_in_adherent ileS; isoleucyl-tRNA synthetase; K01870 isoleucyl-tRNA synthetase [EC:6.1.1.5]                                                  |
| A1378_s_at       | -1.038217292 | 0.018014361 | Decrease_in_adherent rrmJ; 23S rRNA methyltransferase J ; K02427 ribosomal RNA large subunit methyltransferase E [EC:2.1.1.-]                        |
| AFFX-18srRnab_at | -1.037314659 | 0.023731349 | Decrease_in_adherent hypothetical protein                                                                                                            |
| SD1_1796_s_at    | -1.027815486 | 0.030634128 | Decrease_in_adherent proB; gamma-glutamyl kinase (EC:2.7.2.11); K00931 glutamate 5-kinase [EC:2.7.2.11]                                              |
| EC869_4727_s_at  | -1.026555289 | 0.033687954 | Decrease_in_adherent NO_KEGG_DATA                                                                                                                    |
| V1444_s_at       | -1.024177615 | 0.003346884 | Decrease_in_adherent thrS; threonyl-tRNA synthetase (EC:6.1.1.3); K01868 threonyl-tRNA synthetase [EC:6.1.1.3]                                       |
| A2737_s_at       | -1.016617571 | 0.036518349 | Decrease_in_adherent ftsQ; cell division protein FtsQ ; K03589 cell division protein FtsQ                                                            |
| V0847_s_at       | -1.009919138 | 0.026698339 | Decrease_in_adherent hflK; FtsH protease regulator HflK ; K04088 membrane protease subunit HflK [EC:3.4.-.-]                                         |
| A3297_s_at       | -1.008955651 | 0.008239762 | Decrease_in_adherent gltK; glutamate/aspartate ABC transporter, permease protein GltK ; K10002 glutamate/aspartate transport system permease protein |
| N1862_s_at       | -1.007481339 | 0.026313682 | Decrease_in_adherent hisM; histidine transport, membrane protein M ; K10015 histidine transport system permease protein                              |
| A3942_s_at       | -1.007252688 | 0.046696482 | Decrease_in_adherent ychF; GTP-dependent nucleic acid-binding protein EngD ; K06942                                                                  |
| F1449_s_at       | -1.003324469 | 0.036098502 | Decrease_in_adherent pspC; DNA-binding transcriptional activator PspC ; K03973 phage shock protein C                                                 |
| ECs3554_s_at     | -1.001498334 | 0.005213301 | Decrease_in_adherent alanyl-tRNA synthetase (EC:6.1.1.7); K01872 alanyl-tRNA synthetase [EC:6.1.1.7]                                                 |
| F4312_s_at       | -1.001389041 | 0.012877599 | Decrease_in_adherent NO_KEGG_DATA                                                                                                                    |
