# Supplementary material
Source: PubMed Central journal article supplement (PMC3536156)
Supplement: IAI.00919-12_zii999099955so3.pdf [file IAI.00919-12_zii999099955so3.pdf]

Supplemental Table 1: Gene changes at 30 minutes in adherent versus non-adherent samples

| Affy_ID           | Fold change  | p-value     | Realtime change      | Annotation                                                                                                                     | Derivation of annotation |
|-------------------|--------------|-------------|----------------------|--------------------------------------------------------------------------------------------------------------------------------|--------------------------|
| AFFX-25srRnad_at  | 4.470920958  | 0.017607843 | Increase_in_Adherent | hypothetical protein                                                                                                           | ppp:PHYPADRAFT_103626    |
| V0624_x_at        | 4.325939656  | 0.004215304 | Increase_in_Adherent | hypothetical protein ; K05521 ADP-ribosylglycohydrolase [EC:3.2.-.]                                                            | sdv:SDY_2272             |
| V0231_s_at        | 3.911784536  | 0.02822872  | Increase_in_Adherent | ssb; single-stranded DNA-binding protein ; K03111 single-strand DNA-binding protein                                            | sdv:SDY_4508             |
| SD1_1765_at       | 3.456357913  | 0.010221594 | Increase_in_Adherent | NO_KEGG_DATA                                                                                                                   | NO_KEGG_DATA             |
| AFFX-18srRnaa_at  | 3.375808388  | 0.020720921 | Increase_in_Adherent | hypothetical protein LOC769550                                                                                                 | gga:769550               |
| ECP_3198_s_at     | 3.152545933  | 0.004126118 | Increase_in_Adherent | NO_KEGG_DATA                                                                                                                   | NO_KEGG_DATA             |
| V2042_x_at        | 2.970183536  | 0.048314839 | Increase_in_Adherent | yjgJ; putative transferase ; K07393 putative glutathione S-transferase                                                         | sdv:SDY_3291             |
| SB5_0762_s_at     | 2.649128398  | 0.042215803 | Increase_in_Adherent | NO_KEGG_DATA                                                                                                                   | NO_KEGG_DATA             |
| SS5_3223_s_at     | 2.389038504  | 0.003368608 | Increase_in_Adherent | NO_KEGG_DATA                                                                                                                   | NO_KEGG_DATA             |
| AFFX-18srRnad_at  | 2.316797628  | 0.044815725 | Increase_in_Adherent | hypothetical protein                                                                                                           | cre:CHLREDRAFT_155068    |
| b0957_s_at        | 2.294675608  | 0.004411227 | Increase_in_Adherent | NO_KEGG_DATA                                                                                                                   | NO_KEGG_DATA             |
| SD1_0959_s_at     | 2.254413702  | 0.001920777 | Increase_in_Adherent | marA; DNA-binding transcriptional activator MarA                                                                               | sdv:SDY_1596             |
| EC869_4610_x_at   | 2.064036433  | 0.008647714 | Increase_in_Adherent | phosphoglucosyltransferase ; K01835 phosphoglucosyltransferase [EC:5.4.2.2]                                                    | cko:CKO_02471            |
| EC869_2545_s_at   | 2.03112288   | 0.03857958  | Increase_in_Adherent | ruvB; Holliday junction DNA helicase RuvB (EC:3.1.22.4); K03551 holliday junction DNA helicase RuvB                            | sdv:SDY_1147             |
| A0552_s_at        | 1.896042476  | 0.000440449 | Increase_in_Adherent | hscB; co-chaperone HscB ; K04082 molecular chaperone HscB                                                                      | sdv:SDY_2723             |
| EC869_2283_s_at   | 1.872276581  | 0.007504228 | Increase_in_Adherent | metH; B12-dependent methionine synthase ; K00548 5-methyltetrahydrofolate--homocysteine methyltransferase [EC:2.1.1.13]        | cko:CKO_03902            |
| N4402_at          | 1.866897448  | 0.002845441 | Increase_in_Adherent | NO_KEGG_DATA                                                                                                                   | NO_KEGG_DATA             |
| ECP_0062_s_at     | 1.862963467  | 0.01829172  | Increase_in_Adherent | araD; L-ribulose-5-phosphate 4-epimerase (EC:5.1.3.4); K01786 L-ribulose-5-phosphate 4-epimerase [EC:5.1.3.4]                  | kpe:KPK_4682             |
| V0550_s_at        | 1.752660578  | 0.033176747 | Increase_in_Adherent | yegH; UPP0053 protein YegH                                                                                                     | ctu:ctu_27600            |
| A3829_s_at        | 1.728097527  | 0.009607232 | Increase_in_Adherent | ycrR; hypothetical protein ; K12151 multiple stress resistance protein BhsA                                                    | sdv:SDY_2038             |
| F0704_at          | 1.694801028  | 0.015316544 | Increase_in_Adherent | rihA; ribonucleoside hydrolase 1; K01250 pyrimidine-specific ribonucleoside hydrolase [EC:3.2.-.]                              | asa:ASA_2899             |
| EC536_4654_x_at   | 1.621475824  | 0.036949765 | Increase_in_Adherent | ybjU; L-threonine aldolase ; K01620 threonine aldolase [EC:4.1.2.5]                                                            | sdv:SDY_2393             |
| b4060_s_at        | 1.568394879  | 0.022484572 | Increase_in_Adherent | yjcB; hypothetical protein                                                                                                     | sdv:SDY_4507             |
| b3772_s_at        | 1.245901861  | 0.024266896 | Increase_in_Adherent | NO_KEGG_DATA                                                                                                                   | NO_KEGG_DATA             |
| APECCO1_538_at    | 1.21722829   | 0.049137631 | Increase_in_Adherent | NO_KEGG_DATA                                                                                                                   | NO_KEGG_DATA             |
| A0549_s_at        | 1.136101811  | 0.033053849 | Increase_in_Adherent | yfhJ; hypothetical protein                                                                                                     | sdv:SDY_2720             |
| ECs1782_x_at      | 1.120720706  | 0.027837234 | Increase_in_Adherent | NO_KEGG_DATA                                                                                                                   | NO_KEGG_DATA             |
| SD1_0481_s_at     | -7.223991574 | 0.022917096 | Decrease_in_adherent | glpD; glycerol-3-phosphate dehydrogenase (EC:1.1.5.3); K00111 glycerol-3-phosphate dehydrogenase [EC:1.1.5.3]                  | sbcb:SbBS512_E3808       |
| V2454_s_at        | -6.332994897 | 0.048405801 | Decrease_in_adherent | dhaL; dihydroxyacetone kinase ADP-binding subunit (EC:2.7.1.-); K05879 dihydroxyacetone kinase, C-terminal domain [EC:2.7.1.-] | sbcb:SbBS512_E1358       |
| ECP_4135_s_at     | -5.885074041 | 0.022606293 | Decrease_in_adherent | glpK; glycerol kinase (EC:2.7.1.30); K00864 glycerol kinase [EC:2.7.1.30]                                                      | sdv:SDY_3818             |
| A1237_s_at        | -5.432857895 | 0.011475071 | Decrease_in_adherent | glgS; glycogen synthesis protein GlgS                                                                                          | sdv:SDY_3228             |
| b4189_s_at        | -5.307529193 | 0.003453076 | Decrease_in_adherent | yjfo; hypothetical protein                                                                                                     | sdv:SDY_4358             |
| D4048_at          | -5.138879246 | 0.036237835 | Decrease_in_adherent | NO_KEGG_DATA                                                                                                                   | NO_KEGG_DATA             |
| EC869_4008_s_at   | -4.759298317 | 0.023899362 | Decrease_in_adherent | pfkB; formate acetyltransferase 1 ; K00656 formate C-acetyltransferase [EC:2.3.1.54]                                           | sdv:SDY_2358             |
| A2373_s_at        | -4.664693451 | 0.035059433 | Decrease_in_adherent | frdD; fumarate reductase subunit D ; K00247 fumarate reductase subunit D [EC:1.3.99.1]                                         | sdv:SDY_4395             |
| A3460_s_at        | -4.631782184 | 0.018128331 | Decrease_in_adherent | ybhQ; hypothetical protein                                                                                                     | sdv:SDY_0812             |
| A1575_s_at        | -4.415890215 | 0.03172692  | Decrease_in_adherent | pkcA; phosphoenolpyruvate carboxykinase (EC:4.1.1.49); K01610 phosphoenolpyruvate carboxykinase (ATP) [EC:4.1.1.49]            | eci:UTI89_C3903          |
| p166897_140_s_at  | -4.386728208 | 0.038029993 | Decrease_in_adherent | mok; modulator of post-segregation killing protein                                                                             | ecv:APECCO1_O1CoBM20     |
| SD1_0513_s_at     | -4.373967506 | 0.033309929 | Decrease_in_adherent | pkcA; phosphoenolpyruvate carboxykinase (EC:4.1.1.49); K01610 phosphoenolpyruvate carboxykinase (ATP) [EC:4.1.1.49]            | sdv:SDY_3673             |
| V2453_s_at        | -4.330542027 | 0.04250194  | Decrease_in_adherent | dhaH; fused putative dihydroxyacetone-specific PTS enzymes: HPr component/EI component; K05881 PTS hybrid protein              | eoh:ECO103_1300          |
| EC869_0354_s_at   | -4.218228956 | 0.009430225 | Decrease_in_adherent | NO_KEGG_DATA                                                                                                                   | NO_KEGG_DATA             |
| S2143_x_at        | -4.175134165 | 0.027093037 | Decrease_in_adherent | putative cell killing protein of prophage                                                                                      | sfx:S2143                |
| pCoo074_at        | -4.140504998 | 0.020261097 | Decrease_in_adherent | flmC; modulator of post-segregation killing protein                                                                            | ecz:PECS88_0057          |
| b1376_s_at        | -4.096458464 | 0.042866434 | Decrease_in_adherent | ynaF; stress-induced protein, ATP-binding protein                                                                              | ebr:ECB_01347            |
| V0034_s_at        | -4.049579703 | 0.011568516 | Decrease_in_adherent | frdC; fumarate reductase subunit C ; K00246 fumarate reductase subunit C [EC:1.3.99.1]                                         | sbcb:SbBS512_E4684       |
| F2023_at          | -4.022872514 | 0.013751706 | Decrease_in_adherent | hypothetical protein                                                                                                           | sdv:SDY_1970             |
| M3390_at          | -4.01348977  | 0.004038399 | Decrease_in_adherent | NO_KEGG_DATA                                                                                                                   | NO_KEGG_DATA             |
| V4759_s_at        | -3.919556048 | 0.008285338 | Decrease_in_adherent | rbsD; D-ribose pyranase ; K06726 D-ribose pyranase [EC:5.-.-.]                                                                 | sbcb:SbBS512_E4172       |
| A2504_s_at        | -3.847347788 | 0.005788862 | Decrease_in_adherent | virK; regulator of VirG protein ; K09824 hypothetical protein                                                                  | ecq:ECED1_5142           |
| A3486_s_at        | -3.801684766 | 0.014359919 | Decrease_in_adherent | ompX; outer membrane protein X ; K11934 outer membrane protein X                                                               | sdv:SDY_0781             |
| A4639_s_at        | -3.715093427 | 0.018412821 | Decrease_in_adherent | cold shock-like protein CspC ; K03704 cold shock protein (beta-ribon, CspA family)                                             | cko:CKO_01152            |
| V0028_s_at        | -3.588551543 | 0.012823351 | Decrease_in_adherent | frdA; fumarate reductase flavoprotein subunit (EC:1.3.99.1); K00244 fumarate reductase flavoprotein subunit [EC:1.3.99.1]      | sdv:SDY_4398             |
| SD1_0444_s_at     | -3.568812714 | 0.008546842 | Decrease_in_adherent | NO_KEGG_DATA                                                                                                                   | NO_KEGG_DATA             |
| A3388_s_at        | -3.545975813 | 0.044092556 | Decrease_in_adherent | gpmA; phosphoglyceromutase 1 ; K01834 phosphoglycerate mutase [EC:5.4.2.1]                                                     | sdv:SDY_0702             |
| APECCO1_1866_s_at | -3.541356073 | 0.016097667 | Decrease_in_adherent | NO_KEGG_DATA                                                                                                                   | NO_KEGG_DATA             |
| ECs0987_s_at      | -3.528561093 | 0.030543274 | Decrease_in_adherent | focA; formate transporter ; K06212 formate transporter                                                                         | sdv:SDY_2357             |
| SB5_0930_x_at     | -3.524850355 | 0.041499854 | Decrease_in_adherent | relF; polypeptide destructive to membrane potential                                                                            | sdv:SDY_1432             |
| EC869_3973_s_at   | -3.492847032 | 0.011403082 | Decrease_in_adherent | transcriptional regulator, AsnC family                                                                                         | etr:ETA_E2200            |
| V4449_s_at        | -3.489894981 | 0.016197632 | Decrease_in_adherent | dmsA; anaerobic dimethyl sulfoxide reductase subunit A ; K07306 anaerobic dimethyl sulfoxide reductase subunit A [EC:1.8.99.-] | sbo:SBO_0827             |
| F0555_s_at        | -3.471876393 | 0.042310262 | Decrease_in_adherent | NO_KEGG_DATA                                                                                                                   | NO_KEGG_DATA             |
| W4348_at          | -3.404942754 | 0.008225376 | Decrease_in_adherent | putative cytoplasmic protein                                                                                                   | stm:STM4002              |
| EC869_3430_s_at   | -3.400923688 | 0.040124383 | Decrease_in_adherent | NO_KEGG_DATA                                                                                                                   | NO_KEGG_DATA             |
| A2345_s_at        | -3.392649924 | 0.021081437 | Decrease_in_adherent | yjdJ; hypothetical protein ; K06975                                                                                            | sdv:SDY_4240             |
| A1592_s_at        | -3.365985888 | 0.027425645 | Decrease_in_adherent | transcriptional regulator MalT; K03556 LuxR family transcriptional regulator, maltose regulon positive regulatory protein      | eci:EcolC_0295           |
| V4294_s_at        | -3.336375417 | 0.042559551 | Decrease_in_adherent | NO_KEGG_DATA                                                                                                                   | NO_KEGG_DATA             |
| b2597_s_at        | -3.323309199 | 0.04442532  | Decrease_in_adherent | hypothetical protein                                                                                                           | eci:UTI89_C2930          |
| UTI89_C2497_s_at  | -3.320190255 | 0.016752562 | Decrease_in_adherent | NO_KEGG_DATA                                                                                                                   | NO_KEGG_DATA             |
| A4608_s_at        | -3.311394611 | 0.042141297 | Decrease_in_adherent | yeaQ; hypothetical protein                                                                                                     | sdv:SDY_1695             |
| A2210_s_at        | -3.299638245 | 0.035258695 | Decrease_in_adherent | hupA; transcriptional regulator HU subunit alpha ; K05787 DNA-binding protein HU-alpha                                         | sdv:SDY_3726             |
| A0068_at          | -3.259733347 | 0.017566618 | Decrease_in_adherent | vipB; Vi polysaccharide biosynthesis protein VipB/TviC                                                                         | ecw:EcE24377A_2324       |
| S1023_s_at        | -3.252535784 | 0.013598245 | Decrease_in_adherent | NO_KEGG_DATA                                                                                                                   | NO_KEGG_DATA             |

|                 |              |             |                                                                                                                                                             |                     |
|-----------------|--------------|-------------|-------------------------------------------------------------------------------------------------------------------------------------------------------------|---------------------|
| b4032_s_at      | -3.220450258 | 0.044592502 | Decrease_in_adherent malG; maltose transporter permease ; K10110 maltose/maltodextrin transport system permease protein                                     | ssn:SSON_4210       |
| V5399_s_at      | -3.196176977 | 0.032490266 | Decrease_in_adherent glgC; glucose-1-phosphate adenylyltransferase (EC:2.7.7.27); K00975 glucose-1-phosphate adenylyltransferase [EC:2.7.7.27]              | sdv:SDY_3576        |
| A4742_s_at      | -3.189399709 | 0.020412123 | Decrease_in_adherent flhC; flagellin ; K02406 flagellin                                                                                                     | ecw:EcE24377A_2158  |
| A1301_s_at      | -3.183249419 | 0.002607063 | Decrease_in_adherent putative inner membrane protein                                                                                                        | sbcs:SbBS512_E3254  |
| b3339_s_at      | -3.163257277 | 0.002135027 | Decrease_in_adherent tufB, tuF; elongation factor Tu (EC:3.6.5.3); K02358 elongation factor EF-Tu [EC:3.6.5.3]                                              | sdv:SDY_3748        |
| SB5_1096_s_at   | -3.15504836  | 0.02955258  | Decrease_in_adherent gabD; succinate-semialdehyde dehydrogenase 1 ; K00135 succinate-semialdehyde dehydrogenase (NADP+) (EC:1.2.1.16)                       | cko:CKO_04008       |
| A1966_s_at      | -3.14381204  | 0.0119913   | Decrease_in_adherent yjif; hypothetical protein ; K09897 hypothetical protein                                                                               | sdv:SDY_3984        |
| c1093_s_at      | -3.137432379 | 0.010580129 | Decrease_in_adherent ompA; outer membrane protein A ; K03286 OmpA-OmpF porin, OOP family                                                                    | efe:EFER_1094       |
| EC536_0181_s_at | -3.11566593  | 0.021704303 | Decrease_in_adherent dsdA; D-serine dehydratase (EC:4.3.1.18); K01753 D-serine dehydratase [EC:4.3.1.18]                                                    | eum:ECUMN_2695      |
| A2446_s_at      | -3.11216834  | 0.015516565 | Decrease_in_adherent NO_KEGG_DATA                                                                                                                           | NO_KEGG_DATA        |
| A4412_s_at      | -3.090699703 | 0.019054073 | Decrease_in_adherent ydgA; hypothetical protein                                                                                                             | ssn:SSON_1546       |
| A2825_s_at      | -3.081820804 | 0.001257776 | Decrease_in_adherent hipA; periplasmic chaperone ; K06142 outer membrane protein                                                                            | sdv:SDY_0194        |
| A2260_s_at      | -3.066645    | 0.025841585 | Decrease_in_adherent yjbj; putative stress-response protein                                                                                                 | sdv:SDY_4529        |
| APECO1_3321_at  | -3.055990403 | 0.038872056 | Decrease_in_adherent NO_KEGG_DATA                                                                                                                           | NO_KEGG_DATA        |
| A2344_s_at      | -3.055869296 | 0.030996683 | Decrease_in_adherent yjdl; hypothetical protein                                                                                                             | sbcs:SBO_4330       |
| V0059_s_at      | -3.03297055  | 0.012649494 | Decrease_in_adherent hypothetical protein                                                                                                                   | cko:CKO_03698       |
| Pc0o013_at      | -3.008891096 | 0.024089807 | Decrease_in_adherent CS1 type fimbrial major subunit                                                                                                        | spe:Spro_0216       |
| N4689_at        | -3.003200769 | 0.022818542 | Decrease_in_adherent NO_KEGG_DATA                                                                                                                           | NO_KEGG_DATA        |
| SB5_3099_s_at   | -2.997607797 | 0.022204728 | Decrease_in_adherent fruB; bifunctional fructose-specific PTS IIA/HPr protein (EC:2.7.1.-); K02768 PTS system, fructose-specific IIA component [EC:2.7.1.-] | sbcs:SbBS512_E0794  |
| V5372_s_at      | -2.994996594 | 0.020437474 | Decrease_in_adherent yhhA; hypothetical protein                                                                                                             | sdv:SDY_3596        |
| V0004_s_at      | -2.9880727   | 0.030424799 | Decrease_in_adherent NO_KEGG_DATA                                                                                                                           | NO_KEGG_DATA        |
| A0438_s_at      | -2.960997374 | 0.018983387 | Decrease_in_adherent crr; glucose-specific PTS system component (EC:2.7.1.-); K02777 PTS system, glucose-specific IIA component [EC:2.7.1.69]               | kpe:KPK_1374        |
| F1837_s_at      | -2.957538417 | 0.011063329 | Decrease_in_adherent hypothetical protein                                                                                                                   | ssn:SSON_1509       |
| EC5510_s_at     | -2.954846897 | 0.003548481 | Decrease_in_adherent hypothetical protein                                                                                                                   | ecp:ECP_2774        |
| A1218_s_at      | -2.944140608 | 0.01737733  | Decrease_in_adherent hypothetical protein                                                                                                                   | eci:UTI89_C3456     |
| b3024_s_at      | -2.944117078 | 0.041585872 | Decrease_in_adherent ygiW; hypothetical protein                                                                                                             | sdv:SDY_3215        |
| EC869_3357_s_at | -2.936271242 | 0.031500452 | Decrease_in_adherent dsdA; D-serine dehydratase (EC:4.3.1.18); K01753 D-serine dehydratase [EC:4.3.1.18]                                                    | eum:ECUMN_2695      |
| V2584_s_at      | -2.931373689 | 0.032353635 | Decrease_in_adherent hypothetical protein                                                                                                                   | sdv:SDY_1871        |
| EC869_4082_s_at | -2.930883571 | 0.017996515 | Decrease_in_adherent ompF; outer membrane protein F ; K09476 outer membrane pore protein F                                                                  | sdv:SDY_2328        |
| APECO1_2795_at  | -2.924268172 | 0.022449992 | Decrease_in_adherent hypothetical protein                                                                                                                   | cko:CKO_05114       |
| V5396_s_at      | -2.912570201 | 0.047041568 | Decrease_in_adherent glgX; glycogen debranching enzyme ; K02438 glycogen operon protein GlgX [EC:3.2.1.-]                                                   | sdv:SDY_3577        |
| A4482_s_at      | -2.903366448 | 0.011386964 | Decrease_in_adherent lpp; murein lipoprotein ; K06078 murein lipoprotein                                                                                    | sdv:SDY_1908        |
| SFV_4079_at     | -2.894859807 | 0.004999097 | Decrease_in_adherent NO_KEGG_DATA                                                                                                                           | NO_KEGG_DATA        |
| A4701_s_at      | -2.893924137 | 0.049528634 | Decrease_in_adherent cheY; chemotaxis regulatory protein CheY ; K03413 two-component system, chemotaxis family, response regulator CheY                     | sbcs:SbBS512_E2175  |
| Z4385_s_at      | -2.885163983 | 0.023961402 | Decrease_in_adherent dkgA; 2,5-diketo-D-gluconate reductase A; K06221 2,5-diketo-D-gluconate reductase A [EC:1.1.1.274]                                     | etw:ECSP_3988       |
| M1848_s_at      | -2.869503811 | 0.014176494 | Decrease_in_adherent hypothetical protein                                                                                                                   | sbcs:SbBS512_A0294  |
| V3949_s_at      | -2.835942057 | 0.028593841 | Decrease_in_adherent narL; transcriptional regulator NarL ; K07684 two-component system, NarL family, nitrate/nitrite response regulator NarL               | sdv:SDY_1275        |
| SDY_3461_x_at   | -2.822584234 | 0.016017765 | Decrease_in_adherent hypothetical protein ; K03747 Smg protein                                                                                              | cko:CKO_04697       |
| A1294_s_at      | -2.807377788 | 0.047303588 | Decrease_in_adherent yqjD; hypothetical protein                                                                                                             | sdv:SDY_3285        |
| SB5_0121_s_at   | -2.800662344 | 0.032865982 | Decrease_in_adherent dppA; dipeptide transporter ; periplasmic-binding component of ABC superfamily ; K12368 dipeptide transport system substrate           | efe:EFER_3541       |
| SD1_0194_s_at   | -2.788062966 | 0.030437167 | Decrease_in_adherent NO_KEGG_DATA                                                                                                                           | NO_KEGG_DATA        |
| F3644_x_at      | -2.786231337 | 0.022993544 | Decrease_in_adherent hypothetical protein ; K03747 Smg protein                                                                                              | cko:CKO_04697       |
| H2868_s_at      | -2.778621041 | 0.017943481 | Decrease_in_adherent ygeA; putative resistance proteins                                                                                                     | sfv:SfV_2918        |
| V2072_s_at      | -2.77694744  | 0.038712243 | Decrease_in_adherent ygiJ; serine/threonine transporter SstT ; K07862 serine/threonine transporter                                                          | sdv:SDY_3274        |
| V5400_s_at      | -2.771148714 | 0.017756792 | Decrease_in_adherent glgC; glucose-1-phosphate adenylyltransferase (EC:2.7.7.27); K00975 glucose-1-phosphate adenylyltransferase [EC:2.7.7.27]              | sdv:SDY_3576        |
| b0786_s_at      | -2.770737865 | 0.042842061 | Decrease_in_adherent ybhL; hypothetical protein ; K06890                                                                                                    | sdv:SDY_0817        |
| A1402_s_at      | -2.746226451 | 0.016021244 | Decrease_in_adherent yhbH; putative sigma(54) modulation protein ; K05808 putative sigma-54 modulation protein                                              | sdv:SDY_3384        |
| EC869_0204_s_at | -2.744170456 | 0.002034535 | Decrease_in_adherent fusA; elongation factor G ; K02355 elongation factor EF-G [EC:3.6.5.3]                                                                 | sdv:SDY_3501        |
| b0145_s_at      | -2.736814274 | 0.037966443 | Decrease_in_adherent dksA; DnaK suppressor protein; K06204 DnaK suppressor protein                                                                          | ctu:Clu_07760       |
| A1915_s_at      | -2.735193504 | 0.014870951 | Decrease_in_adherent NADPH-dependent FMN reductase                                                                                                          | sbcs:SbBS512_E4209  |
| b3609_s_at      | -2.726306692 | 0.017687695 | Decrease_in_adherent secB; preprotein translocase subunit SecB ; K03071 preprotein translocase subunit SecB                                                 | sbcs:SbBS512_E4037  |
| EC869_8934_s_at | -2.724581876 | 0.008169931 | Decrease_in_adherent yihI; hypothetical protein ; K09894 hypothetical protein                                                                               | sdv:SDY_3877        |
| V3863_s_at      | -2.723395334 | 0.049947829 | Decrease_in_adherent ybgE; hypothetical protein                                                                                                             | sdv:SDY_0683        |
| F3186_s_at      | -2.722816065 | 0.00247061  | Decrease_in_adherent gcvH; glycine cleavage system protein H ; K02437 glycine cleavage system H protein                                                     | sbcs:SbBS512_E3325  |
| c4045_x_at      | -2.720021769 | 0.023270178 | Decrease_in_adherent smg; hypothetical protein; K03747 Smg protein                                                                                          | ecc:c4045           |
| c4499_s_at      | -2.71806607  | 0.049959485 | Decrease_in_adherent NO_KEGG_DATA                                                                                                                           | NO_KEGG_DATA        |
| A3337_s_at      | -2.708877651 | 0.040326811 | Decrease_in_adherent ybfA; hypothetical protein                                                                                                             | sdv:SDY_0635        |
| A1282_s_at      | -2.708190398 | 0.000389501 | Decrease_in_adherent aer; aerotaxis sensor receptor, flavoprotein ; K03776 aerotaxis receptor                                                               | ssn:SSON_3210       |
| ECs2281_at      | -2.708003864 | 0.031976133 | Decrease_in_adherent hypothetical protein                                                                                                                   | eo:ECO111_1411      |
| A2487_s_at      | -2.707975906 | 0.033196804 | Decrease_in_adherent alcohol dehydrogenase ; K12957 uncharacterized zinc-type alcohol dehydrogenase-like protein [EC:1.-.-]                                 | ent:Ent638_3652     |
| A3549_s_at      | -2.707063258 | 0.039347907 | Decrease_in_adherent aqpZ; aquaporin Z ; K06188 aquaporin Z                                                                                                 | sdv:SDY_2388        |
| F4812_s_at      | -2.703818181 | 0.003953099 | Decrease_in_adherent msrA; methionine sulfoxide reductase A (EC:1.8.4.11); K07304 peptide-methionine (S)-S-oxide reductase [EC:1.8.4.11]                    | sbcs:SBO_4224       |
| b0865_s_at      | -2.693736505 | 0.030177933 | Decrease_in_adherent ybjP; putative lipoprotein                                                                                                             | ej:ECO26_0992       |
| LH0125_s_at     | -2.691535329 | 0.028141923 | Decrease_in_adherent NO_KEGG_DATA                                                                                                                           | NO_KEGG_DATA        |
| EC869_4578_s_at | -2.689004701 | 0.025252016 | Decrease_in_adherent gloB; hydroxyacylglutathione hydrolase (EC:3.1.2.6); K01069 hydroxyacylglutathione hydrolase [EC:3.1.2.6]                              | sbcs:SbBS512_E0208  |
| A3259_s_at      | -2.683841553 | 0.046040568 | Decrease_in_adherent dduC; C4-dicarboxylate transporter DduC ; K03326 C4-dicarboxylate transporter, DduC family                                             | sbcs:SBO_0486       |
| V0608_s_at      | -2.678926357 | 0.04709623  | Decrease_in_adherent galR; galactitol utilization operon repressor ; K02436 DeoR family transcriptional regulator, galactitol utilization operon repressor  | sdv:SDY_2262        |
| c0250_s_at      | -2.678285474 | 0.006655954 | Decrease_in_adherent yafS; putative S-adenosyl-L-methionine-dependent methyltransferase                                                                     | eoh:ECO103_0207     |
| EC869_4095_s_at | -2.673731415 | 0.044626753 | Decrease_in_adherent NO_KEGG_DATA                                                                                                                           | NO_KEGG_DATA        |
| A3684_s_at      | -2.673111445 | 0.047816752 | Decrease_in_adherent NO_KEGG_DATA                                                                                                                           | NO_KEGG_DATA        |
| V5800_at        | -2.668680978 | 0.005644694 | Decrease_in_adherent yjiE; hypothetical protein                                                                                                             | ssn:SSON_4117       |
| A4382_s_at      | -2.665160026 | 0.013234558 | Decrease_in_adherent NO_KEGG_DATA                                                                                                                           | NO_KEGG_DATA        |
| D4819_s_at      | -2.664195567 | 0.0401991   | Decrease_in_adherent putative transposase                                                                                                                   | ecw:EcE24377A_D0068 |
| SD1_2489_s_at   | -2.660388725 | 0.029022796 | Decrease_in_adherent hypothetical protein                                                                                                                   | ecv:APECO1_2541     |

|                     |               |             |                                                                                                                                                                 |                    |
|---------------------|---------------|-------------|-----------------------------------------------------------------------------------------------------------------------------------------------------------------|--------------------|
| A4340_s_at          | -2.645755969  | 0.023369281 | Decrease_in_adherent ydfG; 3-hydroxy acid dehydrogenase ; K00540 [EC:1.-.-.]                                                                                    | sdv:SDY_1586       |
| ECs5340_s_at        | -2.645066666  | 0.011255873 | Decrease_in_adherent NO_KEGG_DATA                                                                                                                               | NO_KEGG_DATA       |
| EC869_8209_s_at     | -2.640220346  | 0.016305397 | Decrease_in_adherent transketolase [EC:2.2.1.1]; K00615 transketolase [EC:2.2.1.1]                                                                              | ecs:ECs3327        |
| V0789_s_at          | -2.634646315  | 0.019454405 | Decrease_in_adherent putative enzyme ; K01061 carboxymethylglutaminase [EC:3.1.1.45]                                                                            | sdv:SDY_3913       |
| G3937_s_at          | -2.631098282  | 0.001941474 | Decrease_in_adherent putative PsaI                                                                                                                              | ecj:ECO26_p2-29    |
| V1419_s_at          | -2.630118868  | 0.044062828 | Decrease_in_adherent N,N'-diacetylchitinobiose-specific PTS system transporter subunit IIB ; K02760 PTS system, cellobiose-specific IIB component [EC:1.1.1.14] | cko:CKO_01763      |
| H4105_s_at          | -2.617324386  | 0.025738669 | Decrease_in_adherent aphA; acid phosphatase/phosphotransferase [EC:3.1.3.2]; K03788 acid phosphatase (class B) [EC:3.1.3.2]                                     | ecr:ECIAI_4287     |
| A3867_s_at          | -2.615482989  | 0.002955882 | Decrease_in_adherent hypothetical protein                                                                                                                       | ecw:EEc24377A_1438 |
| A2648_s_at          | -2.613411304  | 0.009999934 | Decrease_in_adherent NO_KEGG_DATA                                                                                                                               | NO_KEGG_DATA       |
| A2205_s_at          | -2.608904001  | 0.045187252 | Decrease_in_adherent rsd; anti-RNA polymerase sigma 70 factor ; K07740 regulator of sigma D                                                                     | sbv:SBBS512_E4486  |
| V0844_s_at          | -2.607383169  | 0.012990425 | Decrease_in_adherent hfq; RNA-binding protein Hfq ; K03866 host factor-1 protein                                                                                | sbo:SBO_4284       |
| A3777_s_at          | -2.600396377  | 0.039538609 | Decrease_in_adherent bssS, yocP; biofilm formation regulatory protein BssS ; K12148 biofilm regulator BssS                                                      | sdv:SDY_2095       |
| V2049_s_at          | -2.594410577  | 0.049454699 | Decrease_in_adherent yqjE; hypothetical protein                                                                                                                 | sdv:SDY_3286       |
| A1840_s_at          | -2.58297481   | 0.004088921 | Decrease_in_adherent dinD; DNA-damage-inducible protein D                                                                                                       | sdv:SDY_4076       |
| SD1_2578_s_at       | -2.579316174  | 0.009446506 | Decrease_in_adherent polA; DNA polymerase I [EC:2.7.7.7]; K02335 DNA polymerase I [EC:2.7.7.7]                                                                  | sbv:SBBS512_E4337  |
| J2220_s_at          | -2.573166152  | 0.04710654  | Decrease_in_adherent dinD; DNA-damage-inducible protein D                                                                                                       | ssn:SSON_3761      |
| V4643_s_at          | -2.56497662   | 0.018327755 | Decrease_in_adherent sfsA; sugar fermentation stimulation protein A ; K06206 sugar fermentation stimulation protein A                                           | sdv:SDY_0162       |
| G1262_s_at          | -2.563248604  | 0.033873451 | Decrease_in_adherent trg; methyl-accepting chemotaxis protein III ; K05876 methyl-accepting chemotaxis protein III, ribose and galactose sensor receptor        | ssn:SSON_1721      |
| V3435_s_at          | -2.55985515   | 0.005750668 | Decrease_in_adherent ptsI; phosphoenolpyruvate-protein phosphotransferase [EC:2.7.3.9]; K08483 phosphotransferase system, enzyme I, PtsI [EC:2.7.3.9]           | sdv:SDY_2613       |
| SS5_4352_s_at       | -2.557107256  | 0.022249681 | Decrease_in_adherent NO_KEGG_DATA                                                                                                                               | NO_KEGG_DATA       |
| c5607_at            | -2.555362864  | 0.005749752 | Decrease_in_adherent NO_KEGG_DATA                                                                                                                               | NO_KEGG_DATA       |
| A0712_s_at          | -2.54743645   | 0.031840461 | Decrease_in_adherent ygaG; S-ribosylhomocysteinase ; K07173 S-ribosylhomocysteine lyase [EC:4.4.1.21]                                                           | sdv:SDY_2884       |
| A1428_s_at          | -2.543718687  | 0.034375237 | Decrease_in_adherent putative periplasmic serine protease Do, heat shock protein HtrA; K04772 serine protease DegQ [EC:3.4.21.-]                                | sfi:SF3274         |
| A0044_s_at          | -2.540933283  | 0.030937391 | Decrease_in_adherent sbmC; DNA gyrase inhibitor ; K07470 DNA gyrase inhibitor                                                                                   | ecq:ECED1_2360     |
| SB5_0122_s_at       | -2.536100637  | 0.045469389 | Decrease_in_adherent dppA; dipeptide transport protein ; K12368 dipeptide transport system substrate-binding protein                                            | sdv:SDY_4567       |
| SD1_0474_s_at       | -2.521889747  | 0.022629155 | Decrease_in_adherent glgC; glucose-1-phosphate adenyltransferase [EC:2.7.7.27]; K00975 glucose-1-phosphate adenyltransferase [EC:2.7.7.27]                      | sdv:SDY_3576       |
| A0073_at            | -2.516827841  | 0.014400991 | Decrease_in_adherent rfbC; dTDP-4-dehydrothamnose 3,5-epimerase [EC:5.1.3.13]; K01790 dTDP-4-dehydrothamnose 3,5-epimerase [EC:5.1.3.13]                        | ecw:EEc24377A_2329 |
| F4391_s_at          | -2.515045651  | 0.018330596 | Decrease_in_adherent yjiI; hypothetical protein                                                                                                                 | eum:ECUMN_4439     |
| ECP_3137_s_at       | -2.511576515  | 0.010186434 | Decrease_in_adherent hypothetical protein ; K08060 hypothetical protein                                                                                         | sdv:SDY_3227       |
| A4480_s_at          | -2.51130002   | 0.049080249 | Decrease_in_adherent hypothetical protein                                                                                                                       | sdv:SDY_1904       |
| A3372_s_at          | -2.501747941  | 0.02994567  | Decrease_in_adherent cydA; cytochrome d ubiquinol oxidase, subunit I [EC:1.10.3.-]; K00425 cytochrome bd-I oxidase subunit I [EC:1.10.3.-]                      | sbv:SBBS512_E0654  |
| ECs5520_s_at        | -2.498665343  | 0.027017823 | Decrease_in_adherent hypothetical protein                                                                                                                       | ecy:ECSE_3407      |
| A2739_s_at          | -2.497188784  | 0.017034863 | Decrease_in_adherent hypothetical protein                                                                                                                       | sbo:SBO_0084       |
| V5876_x_at          | -2.491602166  | 0.000691199 | Decrease_in_adherent hypothetical protein                                                                                                                       | sbv:SBBS512_E4390  |
| EC869_3060_s_at     | -2.491349534  | 0.045715968 | Decrease_in_adherent fdhF; formate dehydrogenase-H, selenopolypeptide subunit; K00123 formate dehydrogenase, alpha subunit [EC:1.2.1.2]                         | etw:ECSP_5176      |
| A1722_s_at          | -2.488842736  | 0.033201788 | Decrease_in_adherent bcsF; cellulose biosynthesis protein BcsF                                                                                                  | sbv:SBBS512_E3999  |
| A0071_at            | -2.486981526  | 0.001373403 | Decrease_in_adherent glycosyl transferase, group 2 family protein ; K07011                                                                                      | ecw:EEc24377A_2327 |
| EC869_3914_s_at     | -2.486591119  | 0.016349671 | Decrease_in_adherent elongation factor Tu ; K02358 elongation factor EF-Tu [EC:3.6.5.3]                                                                         | cko:CKO_03011      |
| A4157_s_at          | -2.484840545  | 0.019301254 | Decrease_in_adherent NO_KEGG_DATA                                                                                                                               | NO_KEGG_DATA       |
| V0313_s_at          | -2.451398277  | 0.047103134 | Decrease_in_adherent pgi; glucose-6-phosphate isomerase [EC:5.3.1.9]; K01810 glucose-6-phosphate isomerase [EC:5.3.1.9]                                         | sdv:SDY_4226       |
| EC869_2599_s_at     | -2.433029359  | 0.005494966 | Decrease_in_adherent tar; methyl-accepting chemotaxis protein II; K05875 methyl-accepting chemotaxis protein II, aspartate sensor receptor                      | etw:ECSP_2460      |
| V2498_s_at          | -2.42629146   | 0.048165868 | Decrease_in_adherent mic; putative NAGC-like transcriptional regulator                                                                                          | sdv:SDY_1562       |
| A1408_s_at          | -2.421525238  | 0.004001419 | Decrease_in_adherent yhbL; isoprenoid biosynthesis protein with amidotransferase-like domain                                                                    | sdv:SDY_3390       |
| b2989_s_at          | -2.42138774   | 0.027131027 | Decrease_in_adherent putative glutathione S-transferase YghU [EC:2.5.1.18]; K11209 GST-like protein                                                             | sbv:SBBS512_E3416  |
| SD1_0131_s_at       | -2.419447896  | 0.027446526 | Decrease_in_adherent secB; preprotein translocase subunit SecB ; K03071 preprotein translocase subunit SecB                                                     | sdv:SDY_4042       |
| V2075_s_at          | -2.417216482  | 0.028220053 | Decrease_in_adherent ygiJ; serine/threonine transporter SstT ; K07862 serine/threonine transporter                                                              | sdv:SDY_3274       |
| A2755_s_at          | -2.411917607  | 0.012157235 | Decrease_in_adherent ampE; regulatory protein AmpE ; K03807 AmpE protein                                                                                        | sdv:SDY_0141       |
| A1805_s_at          | -2.403184093  | 0.017394329 | Decrease_in_adherent grxC; glutaredoxin 3 ; K03676 glutaredoxin 3                                                                                               | sdv:SDY_4043       |
| b1743_s_at          | -2.390814801  | 0.001593017 | Decrease_in_adherent hypothetical protein                                                                                                                       | eci:UTI89_C1937    |
| V2685_s_at          | -2.389030097  | 0.042562137 | Decrease_in_adherent NO_KEGG_DATA                                                                                                                               | NO_KEGG_DATA       |
| AFFX-r2-Bs-phe-3_a  | -2.38716443   | 0.004116256 | Decrease_in_adherent pheA; prephenate dehydratase [EC:4.2.1.51]; K04518 prephenate dehydratase [EC:4.2.1.51]                                                    | bsu:BSU27900       |
| V5406_s_at          | -2.384962203  | 0.01725071  | Decrease_in_adherent glgP; glycogen phosphorylase ; K00688 starch phosphorylase [EC:2.4.1.1]                                                                    | sdv:SDY_3574       |
| A1055_at            | -2.38490084   | 0.011128219 | Decrease_in_adherent ATPase                                                                                                                                     | ecw:EEc24377A_3331 |
| ECP_2591_s_at       | -2.377796862  | 0.017290098 | Decrease_in_adherent transposase                                                                                                                                | sbv:SBBS512_E1228  |
| AFFX-r2-Bs-lys-3_at | -2.376561699  | 0.007213925 | Decrease_in_adherent lysA; diaminiopimelate decarboxylase [EC:4.1.1.20]; K01586 diaminiopimelate decarboxylase [EC:4.1.1.20]                                    | bsu:BSU23380       |
| EC536_1048_s_at     | -2.375879892  | 0.043725965 | Decrease_in_adherent putative glutamate dehydrogenase                                                                                                           | eci:UTI89_C0015    |
| SB5_1469_s_at       | -2.375453492  | 0.025308564 | Decrease_in_adherent adhA, adhP; alcohol dehydrogenase ; K00001 alcohol dehydrogenase [EC:1.1.1.1]                                                              | ecs:ECs2082        |
| A3910_s_at          | -2.374609661  | 0.00901464  | Decrease_in_adherent minD; cell division inhibitor MinD ; K03609 septum site-determining protein MinD                                                           | sdv:SDY_1206       |
| EC869_2220_s_at     | -2.370704667  | 0.045751591 | Decrease_in_adherent NO_KEGG_DATA                                                                                                                               | NO_KEGG_DATA       |
| b0222_s_at          | -2.3688920871 | 0.017781698 | Decrease_in_adherent gmhA; phosphoheptose isomerase [EC:5.3.1.-]; K03271 phosphoheptose isomerase [EC:5.-.-.-]                                                  | sbv:SBBS512_E0218  |
| V3521_s_at          | -2.367053651  | 0.036126585 | Decrease_in_adherent transketolase [EC:2.2.1.1]; K00615 transketolase [EC:2.2.1.1]                                                                              | ent:Ent638_2960    |
| D4444_s_at          | -2.360019882  | 0.023516275 | Decrease_in_adherent rpsD; 30S ribosomal protein S4 ; K02986 small subunit ribosomal protein S4                                                                 | cko:CKO_04709      |
| EC869_2796_s_at     | -2.343464571  | 0.007699655 | Decrease_in_adherent ulaR; transcriptional repressor UlaR ; K03477 DeoR family transcriptional regulator, ulaG and ulaABCDEF operon transcription factor        | sbv:SBBS512_E4720  |
| AFFX-PheX-3_at      | -2.343391841  | 0.005485637 | Decrease_in_adherent pheA; prephenate dehydratase [EC:4.2.1.51]; K04518 prephenate dehydratase [EC:4.2.1.51]                                                    | bsu:BSU27900       |
| V4568_s_at          | -2.340640261  | 0.002572386 | Decrease_in_adherent anaerobic ribonucleoside triphosphate reductase [EC:1.17.4.2]; K00527 ribonucleoside-triphosphate reductase [EC:1.17.4.2]                  | ppr:PBPRB0442      |
| V1970_s_at          | -2.338771837  | 0.009283254 | Decrease_in_adherent yraM; putative glycosylase ; K07121                                                                                                        | sdv:SDY_3326       |
| SD1_0493_s_at       | -2.336860367  | 0.01376915  | Decrease_in_adherent malP; maltodextrin phosphorylase ; K00688 starch phosphorylase [EC:2.4.1.1]                                                                | ssn:SSON_3549      |
| A1822_s_at          | -2.333153564  | 0.02220915  | Decrease_in_adherent waaO, rfaI; UDP-glucose:(glucosyl) LPS alpha1,3-glucosyltransferase WaaO ; K03275 UDP-glucose:(glucosyl)LPS alpha-1,3-glucosyltransferase  | ebr:ECB_03486      |
| A2459_s_at          | -2.329186443  | 0.004089684 | Decrease_in_adherent NO_KEGG_DATA                                                                                                                               | NO_KEGG_DATA       |
| A1492_s_at          | -2.326157965  | 0.007033527 | Decrease_in_adherent rplE; 50S ribosomal protein L5 ; K02931 large subunit ribosomal protein L5                                                                 | kpu:KP1_5029       |
| EC869_8291_s_at     | -2.326042959  | 0.040618829 | Decrease_in_adherent crt; lactate-specific PTS system component ; K02777 PTS system, glucose-specific IIA component [EC:2.7.1.69]                               | sdv:SDY_2614       |
| SD1_0613_s_at       | -2.322676759  | 0.015832694 | Decrease_in_adherent did; D-lactate dehydrogenase [EC:1.1.1.28]; K03777 D-lactate dehydrogenase [EC:1.1.1.28]                                                   | sdv:SDY_2155       |
| A2740_s_at          | -2.322507748  | 0.027456889 | Decrease_in_adherent lpxC; UDP-3-O-[3-hydroxymyristoyl] N-acetylglucosamine deacetylase ; K02535 UDP-3-O-[3-hydroxymyristoyl] N-acetylglucosamine deacetylase   | sdv:SDY_0126       |
| A0254_s_at          | -2.320069734  | 0.036340872 | Decrease_in_adherent eco; ecotin ; K08276 ecotin                                                                                                                | sbv:SBBS512_E0731  |

|                       |              |             |                                                                                                                                                                |                     |
|-----------------------|--------------|-------------|----------------------------------------------------------------------------------------------------------------------------------------------------------------|---------------------|
| b3303_s_at            | -2.319463182 | 0.021252692 | Decrease_in_adherent hypothetical protein                                                                                                                      | ecc:c4064           |
| A2738_s_at            | -2.3142691   | 0.038842493 | Decrease_in_adherent ftsA; cell division protein FtsA; K03590 cell division protein FtsA                                                                       | cko:CKO_03281       |
| A1494_s_at            | -2.313597582 | 0.035493527 | Decrease_in_adherent hypothetical protein                                                                                                                      | eci:UT189_C3759     |
| A1858_s_at            | -2.311657531 | 0.024391627 | Decrease_in_adherent nlpA; cytoplasmic membrane lipoprotein-28 ; K02073 D-methionine transport system substrate-binding protein                                | sdv:SDY_4499        |
| SDY_1018_s_at         | -2.304814789 | 0.032796545 | Decrease_in_adherent insertion element IS2 transposase InSD                                                                                                    | sdv:SDY_P215        |
| APECC01_3736_s_at     | -2.302799351 | 0.00584675  | Decrease_in_adherent ygdH; hypothetical protein ; K06966                                                                                                       | sbo:SBO_2676        |
| A0334_s_at            | -2.302543245 | 0.049344224 | Decrease_in_adherent ackA; acetate kinase (EC:2.7.2.1); K00925 acetate kinase [EC:2.7.2.1]                                                                     | sbc:SbBS512_E2672   |
| V4816_s_at            | -2.301784074 | 0.040296977 | Decrease_in_adherent yieE; hypothetical protein                                                                                                                | sdv:SDY_4201        |
| A1959_s_at            | -2.301623107 | 0.034883057 | Decrease_in_adherent rbsB; D-ribose transporter subunit RbsB ; K10439 ribose transport system substrate-binding protein                                        | efe:EFER_4050       |
| EC869_5211_s_at       | -2.29680588  | 0.021415208 | Decrease_in_adherent hypothetical protein                                                                                                                      | sbo:SBO_0084        |
| W0610_s_at            | -2.290848742 | 0.009740668 | Decrease_in_adherent ybeM; putative amidase                                                                                                                    | sdv:SDY_0548        |
| b1717_s_at            | -2.290481666 | 0.036201147 | Decrease_in_adherent hypothetical protein                                                                                                                      | cko:CKO_01743       |
| b4473_s_at            | -2.289253131 | 0.01095831  | Decrease_in_adherent smf; hypothetical protein ; K04096 DNA processing protein                                                                                 | ebr:ECB_03136       |
| A1196_s_at            | -2.288751991 | 0.044600742 | Decrease_in_adherent yghA; oxidoreductase ; K00540 [EC:1.-.-.]                                                                                                 | ssn:SSON_3147       |
| pCoo091_at            | -2.284771224 | 0.028747107 | Decrease_in_adherent hypothetical protein                                                                                                                      | sdv:SDY_0400        |
| D0009_s_at            | -2.284695774 | 0.029258063 | Decrease_in_adherent ydfG; 3-hydroxy acid dehydrogenase ; K00540 [EC:1.-.-.]                                                                                   | sdv:SDY_1586        |
| b4232_s_at            | -2.28318029  | 0.018146441 | Decrease_in_adherent fbp; fructose-1,6-bisphosphatase (EC:3.1.3.11); K03841 fructose-1,6-bisphosphatase I [EC:3.1.3.11]                                        | sdv:SDY_4250        |
| A2460_s_at            | -2.283150472 | 0.002324012 | Decrease_in_adherent nrdG; anaerobic ribonucleotide reductase activating protein ; K04068 anaerobic ribonucleoside-triphosphate reductase activating protein   | kpu:KP1_0523        |
| I1228_s_at            | -2.267423375 | 0.011812626 | Decrease_in_adherent hypothetical protein                                                                                                                      | sbc:SbBS512_E3471   |
| SFV_3194_s_at         | -2.260283233 | 0.006020478 | Decrease_in_adherent pnp; polynucleotide phosphorylase/polyadenylase (EC:2.7.7.8); K00962 polyribonucleotide nucleotidyltransferase [EC:2.7.7.8]               | sbc:SbBS512_E3607   |
| A1819_s_at            | -2.255318124 | 0.009253675 | Decrease_in_adherent waaW; lipopolysaccharide (EC:2.4.1.1); K12985 (galactosyl)LPS 1,2-glucosyltransferase [EC:2.4.1.-]                                        | sbc:SbBS512_E4051   |
| EC869_0982_s_at       | -2.251102572 | 0.039755182 | Decrease_in_adherent hypothetical protein                                                                                                                      | eci:UT189_C2580     |
| A0842_s_at            | -2.247085453 | 0.030881675 | Decrease_in_adherent fucO; L-1,2-propanediol oxidoreductase; K00048 lactaldehyde reductase [EC:1.1.1.77]                                                       | sfx:S3008           |
| b3698_x_at            | -2.246977884 | 0.019885424 | Decrease_in_adherent yidB; hypothetical protein                                                                                                                | sdv:SDY_4180        |
| F0627_s_at            | -2.234157265 | 0.01123948  | Decrease_in_adherent ybdF; hypothetical protein                                                                                                                | eum:ECUMN_0669      |
| A2931_s_at            | -2.230990929 | 0.011163993 | Decrease_in_adherent yagU; hypothetical protein; K08996 putative membrane protein                                                                              | ejc:ECO26_0322      |
| A1485_s_at            | -2.230513218 | 0.035843522 | Decrease_in_adherent secY; preprotein translocase subunit SecY ; K03076 preprotein translocase subunit SecY                                                    | sbc:SbBS512_E3685   |
| F3184_s_at            | -2.228185981 | 0.040515722 | Decrease_in_adherent bgIA; 6-phospho-beta-glucosidase A, cryptic ; K01223 6-phospho-beta-glucosidase [EC:3.2.1.86]                                             | ssn:SSON_3054       |
| AFFX-LysX-3_at        | -2.225862186 | 0.005398828 | Decrease_in_adherent lysA; diamminopimelate decarboxylase (EC:4.1.1.20); K01586 diamminopimelate decarboxylase [EC:4.1.1.20]                                   | bsu:BSU23380        |
| V7076_s_at            | -2.223254918 | 0.023130564 | Decrease_in_adherent putative resistance protein ; K07245 putative copper resistance protein D                                                                 | sdv:SDY_1126        |
| M1380_x_at            | -2.222259587 | 0.029759989 | Decrease_in_adherent phnO; aminoalkylphosphonic acid N-acetyltransferase ; K09994 PhnO protein [EC:2.3.1.-]                                                    | sdv:SDY_4123        |
| A2552_at              | -2.21953293  | 0.030454585 | Decrease_in_adherent N4/N6-methyltransferase family protein                                                                                                    | ecw:EcE24377A_4904  |
| F0793_s_at            | -2.211824983 | 0.001030624 | Decrease_in_adherent pal; peptidoglycan-associated outer membrane lipoprotein ; K03640 peptidoglycan-associated lipoprotein                                    | sbc:SbBS512_E0663   |
| SD1_3096_s_at         | -2.211120824 | 0.024518611 | Decrease_in_adherent hypothetical protein                                                                                                                      | ecc:c4772           |
| A2764_s_at            | -2.209395066 | 0.007162866 | Decrease_in_adherent NO_KEGG_DATA                                                                                                                              | NO_KEGG_DATA        |
| V3520_s_at            | -2.203778585 | 0.035516328 | Decrease_in_adherent talI; transaldolase A (EC:2.2.1.2); K00616 transaldolase [EC:2.2.1.2]                                                                     | sbc:SbBS512_E2830   |
| V1288_x_at            | -2.203019624 | 0.039198371 | Decrease_in_adherent lplA; lipote-protein ligase A (EC:6.3.2.-); K03800 lipote-protein ligase A [EC:2.7.7.63]                                                  | sbc:SbBS512_E4933   |
| N4246_s_at            | -2.198986294 | 0.005396183 | Decrease_in_adherent pgmB; phosphoglycerate mutase (EC:5.4.2.1); K01834 phosphoglycerate mutase [EC:5.4.2.1]                                                   | ssn:SSON_4545       |
| A3909_s_at            | -2.197376954 | 0.030681172 | Decrease_in_adherent minE; cell division topological specificity factor MinE ; K03608 cell division topological specificity factor                             | sdv:SDY_1205        |
| EC869_8327_s_at       | -2.191345367 | 0.026305176 | Decrease_in_adherent selenophosphate synthetase (EC:2.7.9.3); K01008 selenide, water dikinase [EC:2.7.9.3]                                                     | ent:Ent638_1683     |
| V3795_s_at            | -2.187688526 | 0.046912402 | Decrease_in_adherent yahK; putative oxidoreductase                                                                                                             | ssn:SSON_0308       |
| A1493_s_at            | -2.177021385 | 0.048525524 | Decrease_in_adherent ribosomal protein L24 ; K02895 large subunit ribosomal protein L24                                                                        | dda:DD703_0416      |
| EC869_2217_s_at       | -2.174450912 | 0.001652157 | Decrease_in_adherent did; D-lactate dehydrogenase (EC:1.1.1.28); K03777 D-lactate dehydrogenase [EC:1.1.1.28]                                                  | sdv:SDY_2155        |
| AFFX-PheX-5_at        | -2.172467819 | 0.001747308 | Decrease_in_adherent pheB; hypothetical protein; K06209 chorismate mutase [EC:5.4.99.5]                                                                        | bsu:BSU27910        |
| A4724_s_at            | -2.170001952 | 0.039049755 | Decrease_in_adherent fnr; ferritin ; K02217 ferritin 1                                                                                                         | sdv:SDY_1113        |
| EC869_8985_s_at       | -2.162370904 | 0.018571085 | Decrease_in_adherent NO_KEGG_DATA                                                                                                                              | NO_KEGG_DATA        |
| A4591_s_at            | -2.161735676 | 0.033150948 | Decrease_in_adherent aldo/keto reductase family oxidoreductase (EC:1.1.1.218)                                                                                  | ecw:EcE24377A_2005  |
| AFFX-r2-Bs-phe-5_a    | -2.158569893 | 0.001063355 | Decrease_in_adherent pheB; hypothetical protein; K06209 chorismate mutase [EC:5.4.99.5]                                                                        | bsu:BSU27910        |
| V0787_s_at            | -2.158465056 | 0.015271829 | Decrease_in_adherent hypothetical protein                                                                                                                      | ecc:c4772           |
| A3152_s_at            | -2.15727236  | 0.042641015 | Decrease_in_adherent ybbA; putative ABC transporter ATP-binding protein YbbA ; K02003                                                                          | sdv:SDY_0405        |
| AFFX-r2-Bs-thr-3_s_at | -2.153687711 | 0.001756705 | Decrease_in_adherent thrB; homoserine kinase (EC:2.7.1.39); K00872 homoserine kinase [EC:2.7.1.39]                                                             | bsu:BSU32240        |
| AFFX-r2-Bs-phe-M_i    | -2.149877515 | 0.006229183 | Decrease_in_adherent pheA; prephenate dehydratase (EC:4.2.1.51); K04518 prephenate dehydratase [EC:4.2.1.51]                                                   | bsu:BSU27900        |
| b3983_s_at            | -2.149829777 | 0.002371106 | Decrease_in_adherent hypothetical protein                                                                                                                      | ecw:EcE24377A_4522  |
| ECP_2592_s_at         | -2.149377028 | 0.015782012 | Decrease_in_adherent transposase                                                                                                                               | sbc:SbBS512_E1228   |
| pCoo004_s_at          | -2.146695787 | 0.037953922 | Decrease_in_adherent hypothetical protein                                                                                                                      | ecw:EcE24377A_D0044 |
| S85_4126_s_at         | -2.139255818 | 0.045370818 | Decrease_in_adherent grxB; glutaredoxin 2 ; K03675 glutaredoxin 2                                                                                              | sdv:SDY_2089        |
| V1952_s_at            | -2.138432746 | 0.049856312 | Decrease_in_adherent yhbS; hypothetical protein ; K03824 putative acetyltransferase [EC:2.3.1.-]                                                               | sdv:SDY_3335        |
| V5408_s_at            | -2.134835022 | 0.029333794 | Decrease_in_adherent NO_KEGG_DATA                                                                                                                              | NO_KEGG_DATA        |
| AFFX-ThrX-3_at        | -2.129036274 | 0.002251387 | Decrease_in_adherent thrB; homoserine kinase (EC:2.7.1.39); K00872 homoserine kinase [EC:2.7.1.39]                                                             | bsu:BSU32240        |
| V3429_s_at            | -2.125456601 | 0.004922501 | Decrease_in_adherent phosphoribulokinase/uridine kinase family protein ; K00855 phosphoribulokinase [EC:2.7.1.19]                                              | sbc:SbBS512_E3730   |
| A2659_s_at            | -2.123173609 | 0.010267959 | Decrease_in_adherent nhaA; pH-dependent sodium/proton antiporter ; K03313 Na <sup>+</sup> /H <sup>+</sup> antiporter, NhaA family                              | sbc:SbBS512_E0019   |
| SS5_4205_s_at         | -2.122111685 | 0.033353781 | Decrease_in_adherent ycfP; hypothetical protein ; K07000                                                                                                       | sdv:SDY_2042        |
| SF0956_s_at           | -2.119486961 | 0.046768138 | Decrease_in_adherent ycbG; hypothetical protein ; K09911 hypothetical protein                                                                                  | sdv:SDY_0929        |
| F4536_s_at            | -2.11914787  | 0.026868314 | Decrease_in_adherent yjbK; zinc uptake transcriptional repressor ; K09823 Fur family transcriptional regulator, zinc uptake regulator                          | sdv:SDY_4528        |
| b1846_s_at            | -2.118396055 | 0.003323013 | Decrease_in_adherent hypothetical protein                                                                                                                      | ecx:EcHS_A1937      |
| F3193_s_at            | -2.117770503 | 0.03809498  | Decrease_in_adherent ygfB; hypothetical protein ; K09895 hypothetical protein                                                                                  | sdv:SDY_3172        |
| A4104_s_at            | -2.117531905 | 0.034525662 | Decrease_in_adherent pspE; thiosulfate:cyanide sulfurtransferase (EC:2.8.1.1); K03972 phage shock protein E                                                    | sbc:SbBS512_E1544   |
| F3183_s_at            | -2.115022281 | 0.004876805 | Decrease_in_adherent bgIA; 6-phospho-beta-glucosidase BglA (EC:3.2.1.86); K01223 6-phospho-beta-glucosidase [EC:3.2.1.86]                                      | sbc:SbBS512_E3322   |
| V1930_s_at            | -2.112712912 | 0.01874942  | Decrease_in_adherent pnp; polynucleotide phosphorylase/polyadenylase ; K00962 polyribonucleotide nucleotidyltransferase [EC:2.7.7.8]                           | sdv:SDY_3343        |
| A1818_s_at            | -2.111867299 | 0.013793087 | Decrease_in_adherent glycosyl transferase, group 2 family protein (EC:2.4.1.-); K12983 UDP-glucose:(glucosyl)LPS beta-1,3-glucosyltransferase [EC:2.4.1.10]    | sbc:SbBS512_E4050   |
| A1480_s_at            | -2.110999992 | 0.009708878 | Decrease_in_adherent DNA-directed RNA polymerase subunit alpha ; K03040 DNA-directed RNA polymerase subunit alpha [EC:2.7.7.6]                                 | cko:CKO_04708       |
| A1064_s_at            | -2.109780721 | 0.038223591 | Decrease_in_adherent hypothetical protein                                                                                                                      | ecz:ECI388_2090     |
| F1250_s_at            | -2.109037107 | 0.024779055 | Decrease_in_adherent ycgJ; hypothetical protein                                                                                                                | ect:ECIAI39_1896    |
| A1821_s_at            | -2.101803114 | 0.040027522 | Decrease_in_adherent rfaJ2; lipopolysaccharide 1,2-glucosyltransferase (EC:2.4.1.58); K03276 UDP-glucose/galactose:(glucosyl)LPS alpha-1,2-glucosyltransferase | sbc:SbBS512_E4053   |

|                     |              |              |                                                                                                                                                     |                    |
|---------------------|--------------|--------------|-----------------------------------------------------------------------------------------------------------------------------------------------------|--------------------|
| EC869_5719_s_at     | -2.101617292 | 0.00906198   | Decrease_in_adherent pntB; pyridine nucleotide transhydrogenase (EC:1.6.1.2); K00325 NAD(P) transhydrogenase subunit beta [EC:1.6.1.2]              | sdv:SDY_1551       |
| AFFX-PheX-M_at      | -2.095485519 | 0.004930538  | Decrease_in_adherent pheA; prephenate dehydratase (EC:4.2.1.51); K04518 prephenate dehydratase [EC:4.2.1.51]                                        | bsu:BSU27900       |
| AFFX-r2-Bs-lys-5_at | -2.088818571 | 0.021856054  | Decrease_in_adherent lysA; diaminopimelate decarboxylase (EC:4.1.1.20); K01586 diaminopimelate decarboxylase [EC:4.1.1.20]                          | bsu:BSU23380       |
| A4154_s_at          | -2.088284308 | 0.012433318  | Decrease_in_adherent idhA; D-lactate dehydrogenase (EC:1.1.1.28); K03778 D-lactate dehydrogenase [EC:1.1.1.28]                                      | sbcs:SbBS512_E1618 |
| W4306_s_at          | -2.087918415 | 0.017795449  | Decrease_in_adherent hypothetical protein                                                                                                           | sec:SC2696         |
| 4709_at             | -2.086919106 | 0.04689935   | Decrease_in_adherent hypothetical protein; K00973 glucose-1-phosphate thymidyltransferase [EC:2.7.7.24]                                             | cko:CKO_00130      |
| AFFX-ThrX-M_at      | -2.085286265 | 0.001434537  | Decrease_in_adherent thrC; threonine synthase (EC:4.2.3.1); K01733 threonine synthase [EC:4.2.3.1]                                                  | bsu:BSU32250       |
| EC869_2195_s_at     | -2.083500792 | 0.007145303  | Decrease_in_adherent NO_KEGG_DATA                                                                                                                   | NO_KEGG_DATA       |
| S3180_s_at          | -2.083321946 | 0.042537645  | Decrease_in_adherent reverse transcriptase-like protein                                                                                             | sfx:S3180          |
| AFFX-r2-Bs-lys-M_at | -2.08292924  | 0.005893102  | Decrease_in_adherent lysA; diaminopimelate decarboxylase (EC:4.1.1.20); K01586 diaminopimelate decarboxylase [EC:4.1.1.20]                          | bsu:BSU23380       |
| SD1_3346_s_at       | -2.081025705 | 0.049898422  | Decrease_in_adherent ycbB; hypothetical protein                                                                                                     | sdv:SDY_2332       |
| S3181_s_at          | -2.080898861 | 0.047600728  | Decrease_in_adherent reverse transcriptase-like protein                                                                                             | sfx:S3181          |
| b3320_s_at          | -2.078180658 | 0.038911559  | Decrease_in_adherent hypothetical protein                                                                                                           | eci:UT189_C3774    |
| V5404_s_at          | -2.077067582 | 0.027273022  | Decrease_in_adherent glgA; glycogen synthase GlgA; K00703 starch synthase [EC:2.4.1.21]                                                             | ejc:ECCO26_4519    |
| A1609_s_at          | -2.070038125 | 0.016354262  | Decrease_in_adherent glgB; glycogen branching enzyme (EC:2.4.1.18); K00700 1,4-alpha-glucan branching enzyme [EC:2.4.1.18]                          | ssn:SSON_3672      |
| b2908_s_at          | -2.066420735 | 0.027990874  | Decrease_in_adherent pepP; proline aminopeptidase P II; K01262 X-Pro aminopeptidase [EC:3.4.11.9]                                                   | sdv:SDY_3173       |
| AFFX-r2-Bs-thr-5_s_ | -2.065092433 | 0.001665177  | Decrease_in_adherent thrC; threonine synthase (EC:4.2.3.1); K01733 threonine synthase [EC:4.2.3.1]                                                  | bsu:BSU32250       |
| A4665_s_at          | -2.054811165 | 0.01026574   | Decrease_in_adherent eda; keto-hydroxyglutarate-aldolase/keto-deoxy- phosphogluconate aldolase (EC:4.1.2.14 4.1.3.16); K01625 2-dehydro-3-deoxy     | sbcs:SbBS512_E2125 |
| AFFX-r2-Bs-thr-M_s_ | -2.039901151 | 0.001516586  | Decrease_in_adherent thrC; threonine synthase (EC:4.2.3.1); K01733 threonine synthase [EC:4.2.3.1]                                                  | bsu:BSU32250       |
| A1638_s_at          | -2.038213288 | 0.005649696  | Decrease_in_adherent livJ; high-affinity amino acid transport system periplasmic binding protein; K01999 branched-chain amino acid transport system | sdv:SDY_3611       |
| A3367_s_at          | -2.03079881  | 0.01315913   | Decrease_in_adherent sucD; succinyl-CoA synthetase subunit alpha (EC:6.2.1.5); K01902 succinyl-CoA synthetase alpha subunit [EC:6.2.1.5]            | sbc:SbBS512_E0648  |
| A2811_s_at          | -2.026198946 | 0.035513277  | Decrease_in_adherent yaeH; hypothetical protein                                                                                                     | sdv:SDY_0181       |
| A3040_s_at          | -2.021317376 | 0.049964509  | Decrease_in_adherent yaiA; hypothetical protein                                                                                                     | sdv:SDY_0354       |
| S85_0712_s_at       | -2.017689748 | 0.019876349  | Decrease_in_adherent qor; quinone oxidoreductase, NADPH-dependent (EC:1.6.5.5); K00344 NADPH2:quinone reductase [EC:1.6.5.5]                        | ect:ECAI39_4471    |
| A1504_s_at          | -2.004329824 | 0.025131372  | Decrease_in_adherent rpsJ; nusE; 30S ribosomal protein S10; K02946 small subunit ribosomal protein S10                                              | sdv:SDY_3497       |
| A1486_s_at          | -2.003263161 | 0.016585239  | Decrease_in_adherent rplO; 50S ribosomal protein L15; K02876 large subunit ribosomal protein L15                                                    | cko:CKO_04713      |
| S85_0774_s_at       | -2.00204317  | 0.00050454   | Decrease_in_adherent hypothetical protein                                                                                                           | ecw:ECE24377A_4522 |
| EC869_3782_s_at     | -2.001825232 | 0.042411313  | Decrease_in_adherent rplD; 50S ribosomal protein L4; K02926 large subunit ribosomal protein L4                                                      | cko:CKO_04737      |
| W4315_at            | -2.001335341 | 0.024744644  | Decrease_in_adherent hypothetical protein                                                                                                           | eca:ECA1014        |
| EC869_1736_s_at     | -1.999804098 | 0.036677212  | Decrease_in_adherent galR; DNA-binding transcriptional repressor; K02529 LacI family transcriptional regulator                                      | etw:ECSF_3790      |
| b3305_s_at          | -1.99978708  | 0.044941647  | Decrease_in_adherent rplF; 50S ribosomal protein L6; K02933 large subunit ribosomal protein L6                                                      | sdv:SDY_3481       |
| V1849_s_at          | -1.998455608 | 0.013940074  | Decrease_in_adherent yhdA; regulatory protein Csd                                                                                                   | sdv:SDY_3427       |
| AFFX-ThrX-5_at      | -1.989622177 | 0.001320752  | Decrease_in_adherent thrC; threonine synthase (EC:4.2.3.1); K01733 threonine synthase [EC:4.2.3.1]                                                  | bsu:BSU32250       |
| AFFX-LysX-5_at      | -1.987499541 | 0.008525596  | Decrease_in_adherent lysA; diaminopimelate decarboxylase (EC:4.1.1.20); K01586 diaminopimelate decarboxylase [EC:4.1.1.20]                          | bsu:BSU23380       |
| V5991_s_at          | -1.981398568 | 0.002710742  | Decrease_in_adherent dxs; 1-deoxy-D-xylulose-5-phosphate synthase (EC:2.2.1.7); K01662 1-deoxy-D-xylulose-5-phosphate synthase [EC:2.2.1.7]         | sdv:SDY_0310       |
| b3186_s_at          | -1.962582482 | 0.029905836  | Decrease_in_adherent hypothetical protein                                                                                                           | ecw:ECE24377A_3672 |
| AFFX-LysX-M_at      | -1.961351486 | 0.01024491   | Decrease_in_adherent lysA; diaminopimelate decarboxylase (EC:4.1.1.20); K01586 diaminopimelate decarboxylase [EC:4.1.1.20]                          | bsu:BSU23380       |
| A4473_s_at          | -1.961243891 | 0.034576236  | Decrease_in_adherent lipoprotein; K04062 osmotically inducible lipoprotein OsmB                                                                     | cko:CKO_01367      |
| A1290_s_at          | -1.959752266 | 0.001562048  | Decrease_in_adherent NO_KEGG_DATA                                                                                                                   | NO_KEGG_DATA       |
| EC869_0737_s_at     | -1.959548949 | 0.038788028  | Decrease_in_adherent bcsA; cellulose synthase catalytic subunit (EC:2.4.1.12); K00694 cellulose synthase (UDP-forming) [EC:2.4.1.12]                | sbo:SCO_3532       |
| A2616_s_at          | -1.959540298 | 0.044543568  | Decrease_in_adherent NO_KEGG_DATA                                                                                                                   | NO_KEGG_DATA       |
| A4835_at            | -1.958862316 | 0.047733073  | Decrease_in_adherent hypothetical protein                                                                                                           | ecy:ECSF_2244      |
| A3916_s_at          | -1.958424242 | 0.035372692  | Decrease_in_adherent hypothetical protein                                                                                                           | sbc:SbBS512_E1335  |
| SD1_2876_s_at       | -1.957885969 | 0.031084002  | Decrease_in_adherent ycfJ; hypothetical protein                                                                                                     | sdv:SDY_2040       |
| b3928_s_at          | -1.956974622 | 0.013351026  | Decrease_in_adherent yjiU; hypothetical protein; K09892 hypothetical protein                                                                        | sdv:SDY_3816       |
| A1483_s_at          | -1.956543049 | 0.02709938   | Decrease_in_adherent rpsM; 30S ribosomal protein S13; K02952 small subunit ribosomal protein S13                                                    | sdv:SDY_3474       |
| b2572_s_at          | -1.953384576 | 0.042197022  | Decrease_in_adherent rseA; anti-RNA polymerase sigma factor SigE; K03597 sigma-E factor negative regulatory protein RseA                            | sdv:SDY_2813       |
| pC15-1a_039_s_at    | -1.95328342  | 0.0383316    | Decrease_in_adherent NO_KEGG_DATA                                                                                                                   | NO_KEGG_DATA       |
| A0074_x_at          | -1.950410382 | 0.006986047  | Decrease_in_adherent rfbA1; glucose-1-phosphate thymidyltransferase (EC:2.7.7.24); K00973 glucose-1-phosphate thymidyltransferase [EC:2.7.7.24]     | ecw:ECE24377A_2330 |
| A3985_s_at          | -1.945071579 | 0.038407916  | Decrease_in_adherent oppD; oligopeptide transporter ATP-binding component; K02031 peptide/nickel transport system ATP-binding protein               | sbc:SbBS512_E1415  |
| SD1_3577_s_at       | -1.945009524 | 0.005099854  | Decrease_in_adherent ldcC; lysine decarboxylase 2, constitutive; K01582 lysine decarboxylase [EC:4.1.1.18]                                          | ssn:SSON_0199      |
| SD1_2776_s_at       | -1.943081484 | 0.019750013  | Decrease_in_adherent nadE; NH(3)-dependent Nad(+) synthetase                                                                                        | elf:LF82_1436      |
| S85_1833_x_at       | -1.942206505 | 0.000928844  | Decrease_in_adherent eutC; ethanolamine ammonia-lyase small subunit (EC:4.3.1.7); K03736 ethanolamine ammonia-lyase small subunit [EC:4.3.1.7]      | sdv:SDY_2638       |
| A2860_s_at          | -1.941989364 | 0.019844909  | Decrease_in_adherent dnaG; DNA polymerase III subunit epsilon; K02342 DNA polymerase III subunit epsilon [EC:2.7.7.7]                               | sdv:SDY_0234       |
| A4769_s_at          | -1.941700395 | 0.018665534  | Decrease_in_adherent hypothetical protein                                                                                                           | ecv:APECO1_991     |
| V5405_s_at          | -1.938852511 | 0.047723301  | Decrease_in_adherent glgP; glycogen phosphorylase; K00688 starch phosphorylase [EC:2.4.1.1]                                                         | sdv:SDY_3574       |
| A2197_s_at          | -1.928430605 | 0.015723321  | Decrease_in_adherent hypothetical protein                                                                                                           | ecw:ECE24377A_4526 |
| V3363_s_at          | -1.922644218 | 0.037848197  | Decrease_in_adherent aroD; 3-dehydroquinate dehydratase (EC:4.2.1.10); K03785 3-dehydroquinate dehydratase I [EC:4.2.1.10]                          | sdv:SDY_1474       |
| ECs1050_s_at        | -1.920661973 | 0.044121655  | Decrease_in_adherent hypothetical protein                                                                                                           | eci:UT189_C1032    |
| F1202_s_at          | -1.914938031 | 0.00829116   | Decrease_in_adherent hypothetical protein; K07337 hypothetical protein                                                                              | sdv:SDY_2045       |
| b1251_s_at          | -1.90502387  | 0.029600862  | Decrease_in_adherent yciI; YciI-like protein; K09780 hypothetical protein                                                                           | sbo:SBO_1814       |
| V6992_s_at          | -1.903768831 | 0.021349642  | Decrease_in_adherent hypothetical protein; K05875 methyl-accepting chemotaxis protein II, aspartate sensor receptor                                 | cko:CKO_01066      |
| F4930_s_at          | -1.901635338 | 0.021270656  | Decrease_in_adherent NO_KEGG_DATA                                                                                                                   | NO_KEGG_DATA       |
| V3344_s_at          | -1.899897302 | 0.006200037  | Decrease_in_adherent ydiJ; putative oxidase; K06911                                                                                                 | sdv:SDY_1675       |
| EC869_6490_x_at     | -1.899142057 | 0.022442821  | Decrease_in_adherent yqiG; putative transferase; K07393 putative glutathione S-transferase                                                          | sdv:SDY_3291       |
| A3589_at            | -1.894479093 | 0.0311101254 | Decrease_in_adherent hypothetical protein                                                                                                           | ecw:ECE24377A_0989 |
| A0767_at            | -1.891153971 | 0.031908931  | Decrease_in_adherent mutS; DNA mismatch repair protein MutS; K03555 DNA mismatch repair protein MutS                                                | ecw:ECE24377A_3030 |
| EC869_2285_s_at     | -1.88949112  | 0.039860102  | Decrease_in_adherent NO_KEGG_DATA                                                                                                                   | NO_KEGG_DATA       |
| A3801_s_at          | -1.889349174 | 0.033191241  | Decrease_in_adherent rne; RNase E: endoribonuclease for rRNA processing and mRNA degradation; K08300 ribonuclease E [EC:3.1.26.12]                  | hde:HDEF_0352      |
| A0061_x_at          | -1.8864453   | 0.031365034  | Decrease_in_adherent hisI; bifunctional phosphoribosyl-AMP cyclohydrolase/phosphoribosyl-ATP pyrophosphatase protein (EC:3.6.1.31 3.5.4.19); K11    | ssn:SSON_2097      |
| AFFX-DapX-3_at      | -1.885327176 | 0.003104355  | Decrease_in_adherent yjgJ; hypothetical protein                                                                                                     | bsu:BSU22470       |
| A1745_s_at          | -1.883348479 | 0.036354598  | Decrease_in_adherent yiaG; putative transcriptional regulator; K07726 putative transcriptional regulator                                            | sdv:SDY_4348       |
| J5322_s_at          | -1.882021731 | 0.006882226  | Decrease_in_adherent cell wall-associated hydrolase                                                                                                 | bmj:BMULJ_05090    |
| EC536_5493_s_at     | -1.876708758 | 0.032497804  | Decrease_in_adherent hypothetical protein                                                                                                           | eci:UT189_C0464    |

|                    |              |             |                                                                                                                                                                        |                    |
|--------------------|--------------|-------------|------------------------------------------------------------------------------------------------------------------------------------------------------------------------|--------------------|
| V6990_s_at         | -1.874672248 | 0.001898303 | Decrease_in_adherent tar; methyl-accepting chemotaxis protein II ; K05875 methyl-accepting chemotaxis protein II, aspartate sensor receptor                            | ssn:SSON_1231      |
| V2732_s_at         | -1.874413695 | 0.019240863 | Decrease_in_adherent glcB; malate synthase G; K01638 malate synthase [EC:2.3.3.9]                                                                                      | eoj:ECO26_4076     |
| c5012_s_at         | -1.871654681 | 0.03018548  | Decrease_in_adherent hypothetical protein                                                                                                                              | ecc:c5012          |
| SD1_2556_s_at      | -1.869494711 | 0.026160304 | Decrease_in_adherent yihX; phosphatase ; K07025 putative hydrolase of the HAD superfamily                                                                              | sdj:SDY_3858       |
| V7336_s_at         | -1.868257236 | 0.008956466 | Decrease_in_adherent hypothetical protein                                                                                                                              | eci:UT89_C3749     |
| A3783_s_at         | -1.868157371 | 0.01528032  | Decrease_in_adherent rimJ; ribosomal-protein-S5-alanine N-acetyltransferase ; K03790 ribosomal-protein-alanine N-acetyltransferase [EC:2.3.1.128]                      | sdj:SDY_2086       |
| V1600_s_at         | -1.867141509 | 0.013010743 | Decrease_in_adherent mutS; DNA mismatch repair protein MutS ; K03555 DNA mismatch repair protein MutS                                                                  | sdj:SDY_2933       |
| A2000_s_at         | -1.864848597 | 0.021521355 | Decrease_in_adherent hemY; putative protoheme IX biogenesis protein ; K02498 HemY protein                                                                              | sbcs:SbBS512_E4261 |
| SD1_2274_s_at      | -1.860400737 | 0.021917446 | Decrease_in_adherent aas; bifunctional acyl-[acyl carrier protein] synthetase/2-acylglycerophosphoethanolamine acyltransferase (EC:2.3.1.40 6.2.1.20)                  | sbcs:SbBS512_E3026 |
| F3408_s_at         | -1.859902936 | 0.037634922 | Decrease_in_adherent glutathionylspermidine synthase family protein                                                                                                    | sbcs:SbBS512_E3470 |
| EC869_0195_s_at    | -1.857594867 | 0.027736482 | Decrease_in_adherent strA; aminoglycoside-3"-phosphotransferase                                                                                                        | cur:cur_1538       |
| AFFX-r2-Bs-dap-3_a | -1.855090849 | 0.001911642 | Decrease_in_adherent yjgG; hypothetical protein                                                                                                                        | bsu:BSU22470       |
| AFFX-DapX-5_at     | -1.851933922 | 0.00258375  | Decrease_in_adherent dapB; dihydrodipicolinate reductase (EC:1.3.1.26); K00215 dihydrodipicolinate reductase [EC:1.3.1.26]                                             | bsu:BSU22490       |
| V4776_s_at         | -1.850770659 | 0.008717744 | Decrease_in_adherent atpD; FOF1 ATP synthase subunit beta (EC:3.6.3.14); K02112 F-type H+-transporting ATPase subunit beta [EC:3.6.3.14]                               | sdj:SDY_4016       |
| EC536_2379_s_at    | -1.849646214 | 0.030708441 | Decrease_in_adherent ygdE; putative RNA 2'-O-ribose methyltransferase ; K06968                                                                                         | sdj:SDY_3024       |
| EC869_5814_x_at    | -1.849482877 | 0.046628629 | Decrease_in_adherent N-ethylmaleimide reductase ; K10680 N-ethylmaleimide reductase [EC:1.1.1.11]                                                                      | esa:ESA_02010      |
| b3984_s_at         | -1.845899093 | 0.008520268 | Decrease_in_adherent rplA; 50S ribosomal protein L1 ; K02863 large subunit ribosomal protein L1                                                                        | sdj:SDY_3744       |
| AFFX-r2-Bs-dap-5_a | -1.842096634 | 0.003271585 | Decrease_in_adherent dapB; dihydrodipicolinate reductase (EC:1.3.1.26); K00215 dihydrodipicolinate reductase [EC:1.3.1.26]                                             | bsu:BSU22490       |
| A2049_s_at         | -1.83952933  | 0.013451336 | Decrease_in_adherent pepG; proline dipeptidase ; K01271 X-Pro dipeptidase [EC:3.4.13.9]                                                                                | sdj:SDY_3898       |
| A0182_s_at         | -1.831187625 | 0.009913178 | Decrease_in_adherent cdd; cytidine deaminase (EC:3.5.4.5); K01489 cytidine deaminase [EC:3.5.4.5]                                                                      | sbcs:SbBS512_E0828 |
| ECP_2590_s_at      | -1.829625217 | 0.009267053 | Decrease_in_adherent conserved hypothetical protein, putative transposase (fragment)                                                                                   | ecj:ECED1_3022     |
| b1341_s_at         | -1.829472882 | 0.027904989 | Decrease_in_adherent hypothetical protein                                                                                                                              | sdj:SDY_1420       |
| EC869_0563_s_at    | -1.82713166  | 0.013237837 | Decrease_in_adherent prfC; oligopeptidase A ; K01414 oligopeptidase A [EC:3.4.24.70]                                                                                   | sdj:SDY_3564       |
| V6996_s_at         | -1.822425276 | 0.041140436 | Decrease_in_adherent tap; methyl-accepting protein IV ; K05877 methyl-accepting chemotaxis protein IV, peptide sensor receptor                                         | sbcs:SbBS512_E2178 |
| V3104_s_at         | -1.821679744 | 0.012911915 | Decrease_in_adherent cvpA; colicin V production protein ; K03558 membrane protein required for colicin V production                                                    | sdj:SDY_2512       |
| V5329_s_at         | -1.815715847 | 0.037814953 | Decrease_in_adherent hypothetical protein                                                                                                                              | cko:CKO_04902      |
| SBO_3336_s_at      | -1.814369327 | 0.023898688 | Decrease_in_adherent yhfA; hypothetical protein ; K07397 putative redox protein                                                                                        | sdj:SDY_3518       |
| V7066_s_at         | -1.814234516 | 0.001734494 | Decrease_in_adherent hypothetical protein                                                                                                                              | ecx:ECxH_A1937     |
| AFFX-DapX-M_at     | -1.81204451  | 0.002894394 | Decrease_in_adherent mgsA; methylglyoxal synthase (EC:4.2.3.3); K01734 methylglyoxal synthase [EC:4.2.3.3]                                                             | bsu:BSU22480       |
| V6896_s_at         | -1.810557229 | 0.020588378 | Decrease_in_adherent pnuC; required for NMN transport ; K03811 nicotinamide mononucleotide transporter                                                                 | sdj:SDY_0695       |
| AFFX-r2-Bs-dap-M_i | -1.808025418 | 0.003404193 | Decrease_in_adherent mgsA; methylglyoxal synthase (EC:4.2.3.3); K01734 methylglyoxal synthase [EC:4.2.3.3]                                                             | bsu:BSU22480       |
| V0414_s_at         | -1.807496071 | 0.008939783 | Decrease_in_adherent fusA; elongation factor G ; K02355 elongation factor EF-G [EC:3.6.3.3]                                                                            | sdj:SDY_3501       |
| A1482_s_at         | -1.804630723 | 0.012112666 | Decrease_in_adherent rpsK; 30S ribosomal protein S11 ; K02948 small subunit ribosomal protein S11                                                                      | sdj:SDY_3473       |
| A2067_s_at         | -1.804516569 | 0.047510923 | Decrease_in_adherent hemN; coproporphyrinogen III oxidase (EC:1.3.99.22); K02495 oxygen-independent coproporphyrinogen III oxidase [EC:1.3.99.22]                      | sbcs:SbBS512_E4342 |
| EC869_2844_s_at    | -1.800985107 | 0.013261606 | Decrease_in_adherent miaA; delta(2)-isopentenylpyrophosphate tRNA-adenosine transferase; K00791 tRNA delta(2)-isopentenylpyrophosphate transferase                     | etw:ECSP_5271      |
| A1499_s_at         | -1.79568207  | 0.026339725 | Decrease_in_adherent hypothetical protein                                                                                                                              | sec:SC3369         |
| EC869_5206_s_at    | -1.793446273 | 0.019382775 | Decrease_in_adherent secA, azi, div; preprotein translocase subunit SecA ; K03070 preprotein translocase subunit SecA                                                  | sdj:SDY_0128       |
| S85_3503_s_at      | -1.792077217 | 0.01710286  | Decrease_in_adherent yieP; hypothetical protein                                                                                                                        | ssn:SSON_3925      |
| A1230_s_at         | -1.780213953 | 0.004403403 | Decrease_in_adherent hypothetical protein                                                                                                                              | sbcs:SbBS512_E3475 |
| EC869_4279_s_at    | -1.780076409 | 0.003838237 | Decrease_in_adherent channel protein, hemolysin III family ; K11068 hemolysin III                                                                                      | sbcs:SbBS512_E3320 |
| F3660_s_at         | -1.776385315 | 0.013937713 | Decrease_in_adherent NO_KEGG_DATA                                                                                                                                      | NO_KEGG_DATA       |
| F3192_at           | -1.772483841 | 0.029238428 | Decrease_in_adherent NO_KEGG_DATA                                                                                                                                      | NO_KEGG_DATA       |
| V1601_s_at         | -1.771326849 | 0.009517249 | Decrease_in_adherent NO_KEGG_DATA                                                                                                                                      | NO_KEGG_DATA       |
| D0357_x_at         | -1.763122082 | 0.008842884 | Decrease_in_adherent NO_KEGG_DATA                                                                                                                                      | NO_KEGG_DATA       |
| A3838_s_at         | -1.761382614 | 0.039099851 | Decrease_in_adherent cobB; NAD-dependent deacetylase ; K12410 NAD-dependent deacetylase [EC:3.5.1.-]                                                                   | sdj:SDY_2030       |
| A2040_s_at         | -1.759690271 | 0.024818477 | Decrease_in_adherent tatA; twin arginine translocase protein A ; K03116 sec-independent protein translocase protein TatA                                               | sdj:SDY_3907       |
| EC869_4308_x_at    | -1.754265077 | 0.04822182  | Decrease_in_adherent pepP; proline aminopeptidase P II (EC:3.4.11.9); K01262 X-Pro aminopeptidase [EC:3.4.11.9]                                                        | sbcs:SbBS512_E3329 |
| EC536_2815_s_at    | -1.753342847 | 0.047573619 | Decrease_in_adherent ampE; predicted inner membrane protein; K03807 AmpE protein                                                                                       | etw:ECSP_0112      |
| A0436_s_at         | -1.748525156 | 0.044913603 | Decrease_in_adherent ptsH; phosphocarrier protein HPr (EC:2.7.1.69 2.7.3.9); K02784 phosphocarrier protein HPr                                                         | ctu:ctu_30130      |
| pWR501_p125_at     | -1.744982805 | 0.000470059 | Decrease_in_adherent hypothetical protein                                                                                                                              | ecj:pECS88_0004    |
| V2056_s_at         | -1.744697117 | 0.005593048 | Decrease_in_adherent NO_KEGG_DATA                                                                                                                                      | NO_KEGG_DATA       |
| EC869_1228_s_at    | -1.742528457 | 0.0434917   | Decrease_in_adherent cobB; Sir2 family NAD-dependent protein deacetylase; K12410 NAD-dependent deacetylase [EC:3.5.1.-]                                                | asa:ASA_1963       |
| V5190_s_at         | -1.738258552 | 0.003832738 | Decrease_in_adherent bcsE; cellulose biosynthesis protein BcsE                                                                                                         | sbcs:SbBS512_E4000 |
| V3848_s_at         | -1.737872071 | 0.021621828 | Decrease_in_adherent tolC; outer membrane channel protein ; K12340 outer membrane channel protein TolC                                                                 | sdj:SDY_3205       |
| SD1_2612_s_at      | -1.735799173 | 0.014131709 | Decrease_in_adherent NO_KEGG_DATA                                                                                                                                      | NO_KEGG_DATA       |
| V5388_s_at         | -1.724907469 | 0.032968013 | Decrease_in_adherent asd; aspartate-semialdehyde dehydrogenase (EC:1.2.1.11); K00133 aspartate-semialdehyde dehydrogenase [EC:1.2.1.11]                                | sbcs:SbBS512_E3891 |
| A4294_at           | -1.721553713 | 0.002596909 | Decrease_in_adherent hypothetical protein                                                                                                                              | ecw:ECe24377A_1703 |
| SSO_2654_x_at      | -1.71663299  | 0.006589989 | Decrease_in_adherent IS629 ORF2 ; K07497 putative transposase                                                                                                          | ssn:SSON_2654      |
| A2283_s_at         | -1.707365898 | 0.000342475 | Decrease_in_adherent yjcE; hypothetical protein ; K03316 monovalent cation:H+ antiporter, CPA1 family                                                                  | sdj:SDY_4502       |
| A0009_s_at         | -1.704488819 | 0.036433344 | Decrease_in_adherent amn; AMP nucleosidase ; K01241 AMP nucleosidase [EC:3.2.2.4]                                                                                      | efl:LF82_0084      |
| A3304_s_at         | -1.700543238 | 0.020511375 | Decrease_in_adherent putative metalloprotease ; K07042                                                                                                                 | sbcs:SbBS512_E0588 |
| A3365_s_at         | -1.700513162 | 0.024235765 | Decrease_in_adherent sucB; dihydrolipoamide succinyltransferase (EC:2.3.1.61); K00658 2-oxoglutarate dehydrogenase E2 component (dihydrolipoamide succinyltransferase) | sdj:SDY_0665       |
| EC869_7371_s_at    | -1.696183395 | 0.023573993 | Decrease_in_adherent NO_KEGG_DATA                                                                                                                                      | NO_KEGG_DATA       |
| SBO_2958_x_at      | -1.695796638 | 0.031240562 | Decrease_in_adherent insD; IS2 element protein                                                                                                                         | ecj:JW5933         |
| A2354_s_at         | -1.695741445 | 0.014658753 | Decrease_in_adherent cutA; divalent-cation tolerance protein CutA ; K03926 periplasmic divalent cation tolerance protein                                               | sdj:SDY_4442       |
| A2625_s_at         | -1.691663534 | 0.049000851 | Decrease_in_adherent deoD; purine nucleoside phosphorylase (EC:2.4.2.1); K03784 purine-nucleoside phosphorylase [EC:2.4.2.1]                                           | sdj:SDY_4644       |
| EC869_3772_s_at    | -1.691085919 | 0.022497576 | Decrease_in_adherent NO_KEGG_DATA                                                                                                                                      | NO_KEGG_DATA       |
| A2185_s_at         | -1.68922901  | 0.041928947 | Decrease_in_adherent btuB; vitamin B12/cobalamin outer membrane transporter ; K02014 iron complex outer membrane receptor protein                                      | ssn:SSON_4139      |
| S85_4569_s_at      | -1.688360246 | 0.044862864 | Decrease_in_adherent putative transposase                                                                                                                              | kpu:KP1_3603       |
| A0847_s_at         | -1.687359978 | 0.040452733 | Decrease_in_adherent fucU; protein of fucose operon ; K02431 L-fucose mutarotase [EC:5.1.3.-]                                                                          | sdj:SDY_3022       |
| N4419_at           | -1.685879877 | 0.040427603 | Decrease_in_adherent NO_KEGG_DATA                                                                                                                                      | NO_KEGG_DATA       |
| A1747_s_at         | -1.685438831 | 0.002202988 | Decrease_in_adherent glyS; glycyl-tRNA synthetase subunit beta (EC:6.1.1.14); K01879 glycyl-tRNA synthetase beta chain [EC:6.1.1.14]                                   | sbcs:SbBS512_E3966 |
| V3472_s_at         | -1.684429623 | 0.037197143 | Decrease_in_adherent NO_KEGG_DATA                                                                                                                                      | NO_KEGG_DATA       |
| A2272_s_at         | -1.683813405 | 0.003338814 | Decrease_in_adherent hypothetical protein                                                                                                                              | cko:CKO_03844      |

|                   |              |             |                                                                                                                                                                  |                       |
|-------------------|--------------|-------------|------------------------------------------------------------------------------------------------------------------------------------------------------------------|-----------------------|
| A1330_s_at        | -1.683648255 | 0.005975563 | Decrease_in_adherent agaR; DNA-binding transcriptional regulator AgaR; K02081 DeoR family transcriptional regulator, aga operon transcriptional repressifx:S3381 | sdy:SDY_3208          |
| A1221_s_at        | -1.683276456 | 0.027735947 | Decrease_in_adherent icc; cyclic 3',5'-adenosine monophosphate phosphodiesterase ; K03651 lcc protein                                                            | sdj:SDY_4643          |
| V1285_s_at        | -1.682223022 | 0.00487318  | Decrease_in_adherent deoB; phosphopentomutase (EC:5.4.2.7); K01839 phosphopentomutase [EC:5.4.2.7]                                                               | ecf:ECF74115_2579     |
| A3853_s_at        | -1.67875985  | 0.005600448 | Decrease_in_adherent hypothetical protein                                                                                                                        | ecp:ECP_3173          |
| ECP_3173_s_at     | -1.675657819 | 0.021857139 | Decrease_in_adherent hypothetical protein                                                                                                                        | cko:CKO_00553         |
| b2217_s_at        | -1.670862433 | 0.035219713 | Decrease_in_adherent transcriptional regulator RcsB ; K07687 two-component system, NarL family, captular synthesis response regulator RcsB                       | ej:ECJ206_3521        |
| L1644_s_at        | -1.665387639 | 0.049757078 | Decrease_in_adherent mvpT; putative post-segregational killing toxin                                                                                             | sdj:SDY_3460          |
| b3283_s_at        | -1.661590032 | 0.049007997 | Decrease_in_adherent yrdD; putative DNA topoisomerase                                                                                                            | spi:MGAS10750_Spy0657 |
| SDM_4116_x_at     | -1.659165282 | 0.003377262 | Decrease_in_adherent transposase                                                                                                                                 | sdj:SDY_3562          |
| A1678_s_at        | -1.65896197  | 0.044613432 | Decrease_in_adherent gor; glutathione reductase (EC:1.8.1.7); K00383 glutathione reductase (NADPH) [EC:1.8.1.7]                                                  | sbo:SBO_3529          |
| EC869_0750_s_at   | -1.658643949 | 0.033681143 | Decrease_in_adherent yhjL; putative oxidoreductase subunit                                                                                                       | eoh:ECO103_4309       |
| SS5_4621_s_at     | -1.657842655 | 0.024608571 | Decrease_in_adherent yihF; hypothetical protein                                                                                                                  | sdj:SDY_3577          |
| V5395_s_at        | -1.651176359 | 0.046731677 | Decrease_in_adherent glgX; glycogen debranching enzyme ; K02438 glycogen operon protein GlgX [EC:3.2.1.-]                                                        | sdj:SDY_1224          |
| V2429_s_at        | -1.64964153  | 0.001009995 | Decrease_in_adherent fadR; fatty acid metabolism regulator ; K03603 GntR family transcriptional regulator, negative regulator for fad regulon and posit          | ecv:APECO1_1817       |
| A2816_s_at        | -1.642063212 | 0.003835267 | Decrease_in_adherent hypothetical protein                                                                                                                        | NO_KEGG_DATA          |
| A0532_s_at        | -1.638950026 | 0.019058861 | Decrease_in_adherent NO_KEGG_DATA                                                                                                                                | sdj:SDY_3577          |
| SFV_3732_s_at     | -1.632619741 | 0.029358285 | Decrease_in_adherent ilvE; branched-chain amino acid aminotransferase (EC:2.6.1.42); K00826 branched-chain amino acid aminotransferase [EC:2.6.1.42]             | sfv:SfV_3732          |
| V2162_s_at        | -1.626758992 | 0.021585055 | Decrease_in_adherent tldD; protease TldD ; K03568 TldD protein                                                                                                   | ssn:SSON_3386         |
| SD1_1427_x_at     | -1.62639457  | 0.011049472 | Decrease_in_adherent rne; fused ribonucleaseE: endoribonuclease/RNA-binding protein/RNA degradosome binding protein ; K08300 ribonuclease E [E                   | ebw:BWG_0932          |
| V6077_s_at        | -1.626274701 | 0.036788534 | Decrease_in_adherent ddl; D-alanyl-alanine synthetase A (EC:6.3.2.4); K01921 D-alanine-D-alanine ligase [EC:6.3.2.4]                                             | sbj:SbBS512_E0298     |
| V0117_s_at        | -1.621627085 | 0.025485811 | Decrease_in_adherent yjzC; hypothetical protein                                                                                                                  | ej:ECJ206_5222        |
| A1527_s_at        | -1.604954134 | 0.019911665 | Decrease_in_adherent crp; cAMP-regulatory protein ; K10914 CRP/FNR family transcriptional regulator, cyclic AMP receptor protein                                 | ecw:EcE24377A_3827    |
| A4774_s_at        | -1.604673562 | 0.039638059 | Decrease_in_adherent hypothetical protein                                                                                                                        | eum:ECUMN_2248        |
| S1910_x_at        | -1.602758746 | 0.036894431 | Decrease_in_adherent IS629 orfB                                                                                                                                  | sfx:S1910             |
| A1830_s_at        | -1.600239712 | 0.032820124 | Decrease_in_adherent rpmB; 50S ribosomal protein L28 ; K02902 large subunit ribosomal protein L28                                                                | kpu:KP1_5329          |
| A1226_s_at        | -1.584526716 | 0.011936434 | Decrease_in_adherent hypothetical protein                                                                                                                        | sbj:SbBS512_E3469     |
| EC869_5213_s_at   | -1.579036658 | 0.033041796 | Decrease_in_adherent hypothetical protein                                                                                                                        | sbo:SBO_0084          |
| EC536_0056_s_at   | -1.575346743 | 0.017518671 | Decrease_in_adherent galK; galactokinase (EC:2.7.1.6); K00849 galactokinase [EC:2.7.1.6]                                                                         | sdj:SDY_0704          |
| EC869_2729_s_at   | -1.571062196 | 0.046551007 | Decrease_in_adherent ushA; bifunctional UDP-sugar hydrolase/5'-nucleotidase periplasmic precursor (EC:3.1.3.5 3.6.1.45); K11751 5'-nucleotidase /                | Usdy:SDY_0438         |
| SSO_3593_x_at     | -1.568250578 | 0.0233295   | Decrease_in_adherent IS629 ORF2                                                                                                                                  | sdj:SDY_P062          |
| V1458_s_at        | -1.560700395 | 0.030793693 | Decrease_in_adherent sdaA; L-serine ammonia-lyase 1 (EC:4.3.1.17); K01752 L-serine dehydratase [EC:4.3.1.17]                                                     | sbj:SbBS512_E2075     |
| F4327_s_at        | -1.558594934 | 0.005874529 | Decrease_in_adherent hypothetical protein                                                                                                                        | bnj:BMULJ_05092       |
| c3926_s_at        | -1.558269939 | 0.004797683 | Decrease_in_adherent nusA; transcription elongation factor NusA ; K02600 N utilization substance protein A                                                       | ssn:SSON_3315         |
| V2858_s_at        | -1.55578134  | 0.042782613 | Decrease_in_adherent epd; erythrose 4-phosphate dehydrogenase ; K03472 D-erythrose 4-phosphate dehydrogenase [EC:1.2.1.72]                                       | sdj:SDY_3155          |
| V6233_s_at        | -1.555117376 | 0.011399756 | Decrease_in_adherent fdnG; formate dehydrogenase N, nitrate-inducible, alpha subunit ; K08348 formate dehydrogenase-N, alpha subunit [EC:1.2.1.2                 | sbo:SBO_1583          |
| A1479_s_at        | -1.553258699 | 0.005318093 | Decrease_in_adherent rplQ; 50S ribosomal protein L17 ; K02879 large subunit ribosomal protein L17                                                                | sdj:SDY_3470          |
| A0762_s_at        | -1.552545488 | 0.033614957 | Decrease_in_adherent IS3 ORF1                                                                                                                                    | sfv:SfV_2924          |
| F3693_s_at        | -1.552448076 | 0.044195674 | Decrease_in_adherent NO_KEGG_DATA                                                                                                                                | NO_KEGG_DATA          |
| V4454_s_at        | -1.551263287 | 0.040786766 | Decrease_in_adherent NO_KEGG_DATA                                                                                                                                | NO_KEGG_DATA          |
| SD1_1429_s_at     | -1.545814815 | 0.017190173 | Decrease_in_adherent flgL; flagellar hook-associated protein FlgL ; K02397 flagellar hook-associated protein 3 FlgL                                              | sdj:SDY_2068          |
| b3207_s_at        | -1.544619153 | 0.035134191 | Decrease_in_adherent yrfL; hypothetical protein                                                                                                                  | ssn:SSON_3355         |
| A0078_s_at        | -1.540399612 | 0.027401744 | Decrease_in_adherent galF; UTP--glucose-1-phosphate uridylyltransferase subunit GalF ; K00963 UTP--glucose-1-phosphate uridylyltransferase [EC:2.7.1.69]         | sdj:SDY_2203          |
| EC869_1179_s_at   | -1.536666035 | 0.034721666 | Decrease_in_adherent ptsG; glucose-specific PTS system IIBC components ; K02778 PTS system, glucose-specific IIB component [EC:2.7.1.69]; K02                    | sdj:SDY_2049          |
| SB5_1478_x_at     | -1.53616951  | 0.008111675 | Decrease_in_adherent insertion sequence 2 OrfA protein                                                                                                           | sdj:SDY_2774          |
| c3662_s_at        | -1.528786538 | 0.010871909 | Decrease_in_adherent NO_KEGG_DATA                                                                                                                                | NO_KEGG_DATA          |
| A2092_s_at        | -1.528192741 | 0.038500621 | Decrease_in_adherent hypothetical protein                                                                                                                        | ej:ECJ206_4700        |
| SB5_0532_x_at     | -1.527343078 | 0.025686622 | Decrease_in_adherent IS1 orfA                                                                                                                                    | sfx:S4666             |
| c3612_x_at        | -1.522878137 | 0.04029976  | Decrease_in_adherent insC; IS2 insertion element repressor InsA; KpLE2 phage-like element                                                                        | eum:ECUMN_3359        |
| EC536_6355_s_at   | -1.518395157 | 0.010478881 | Decrease_in_adherent trpS; tryptophanyl-tRNA synthetase (EC:6.1.1.2); K01867 tryptophanyl-tRNA synthetase [EC:6.1.1.2]                                           | sdj:SDY_3695          |
| SF1779_s_at       | -1.516019914 | 0.034415803 | Decrease_in_adherent hypothetical protein                                                                                                                        | sfx:S1495             |
| K2638_s_at        | -1.504680573 | 0.004560684 | Decrease_in_adherent flgK; flagellar hook-associated protein FlgK ; K02396 flagellar hook-associated protein 1 FlgK                                              | cko:CKO_01977         |
| SS5_0656_x_at     | -1.497202741 | 0.014762491 | Decrease_in_adherent insC; insertion sequence 2 OrfA protein                                                                                                     | eum:p1ECUMN_0004      |
| A3809_s_at        | -1.494008419 | 0.023982112 | Decrease_in_adherent fabG; 3-ketoacyl-(acyl-carrier-protein) reductase (EC:1.1.1.100); K00059 3-oxoacyl-(acyl-carrier protein) reductase [EC:1.1.1.10            | sbj:SbBS512_E2231     |
| APECC01_2262_x_at | -1.491420619 | 0.002237151 | Decrease_in_adherent insA; IS1 repressor protein InsA                                                                                                            | ecj:ECJ206_4717       |
| SB5_4770_x_at     | -1.488896614 | 0.027814789 | Decrease_in_adherent fimD; outer membrane usher protein FimD; K07347 outer membrane usher protein                                                                | ej:ECJ206_5171        |
| S1960_x_at        | -1.480929803 | 0.035830695 | Decrease_in_adherent IS629 ORF2                                                                                                                                  | sfv:SfV_3863          |
| A3397_s_at        | -1.476855794 | 0.000387101 | Decrease_in_adherent NO_KEGG_DATA                                                                                                                                | NO_KEGG_DATA          |
| A0665_s_at        | -1.476127421 | 0.002668371 | Decrease_in_adherent IS21 family transposase                                                                                                                     | ecw:EcE24377A_E0036   |
| A2894_s_at        | -1.473933435 | 0.008928402 | Decrease_in_adherent hypothetical protein                                                                                                                        | ecw:EcE24377A_0258    |
| V1968_s_at        | -1.473493808 | 0.044075849 | Decrease_in_adherent yraO; DnaA initiator-associating protein DiaA ; K12961 DnaA initiator-associating protein                                                   | sdj:SDY_3328          |
| SSO_P077_s_at     | -1.471674687 | 0.000866555 | Decrease_in_adherent putative transposase                                                                                                                        | sdj:SDY_P156          |
| LH0104_s_at       | -1.468751739 | 0.039990871 | Decrease_in_adherent hypothetical protein                                                                                                                        | ssn:SSON_2657         |
| A3018_s_at        | -1.467434202 | 0.043883532 | Decrease_in_adherent hemB; delta-aminolevulinic acid dehydratase (EC:4.2.1.24); K01698 porphobilinogen synthase [EC:4.2.1.24]                                    | sdj:SDY_0501          |
| A3567_s_at        | -1.464936793 | 0.049056566 | Decrease_in_adherent loaA; outer-membrane lipoprotein carrier protein ; K03634 outer membrane lipoproteins carrier protein                                       | sdj:SDY_2370          |
| SBO_0426_x_at     | -1.463580351 | 0.043296895 | Decrease_in_adherent insertion sequence 2 OrfA protein                                                                                                           | sdj:SDY_P216          |
| b3231_s_at        | -1.46099813  | 0.023128866 | Decrease_in_adherent rplM; 50S ribosomal protein L13; K02871 large subunit ribosomal protein L13                                                                 | sfv:SfV_3258          |
| EC869_1162_s_at   | -1.456975187 | 0.03050516  | Decrease_in_adherent fabG; 3-ketoacyl-(acyl-carrier-protein) reductase (EC:1.1.1.100); K00059 3-oxoacyl-(acyl-carrier protein) reductase [EC:1.1.1.10            | sdj:SDY_2057          |
| SDY_2663_s_at     | -1.455037411 | 0.035323272 | Decrease_in_adherent hypothetical protein ; K07054                                                                                                               | sdj:SDY_2663          |
| SD1_1891_s_at     | -1.452352606 | 0.002077395 | Decrease_in_adherent ybaO; putative LRP-like transcriptional regulator ; K05800 Lrp/AsnC family transcriptional regulator                                        | sdj:SDY_0384          |
| A2206_s_at        | -1.447465334 | 0.037085448 | Decrease_in_adherent nudC; NADH pyrophosphatase (EC:3.6.1.22); K03426 NAD+ diphosphatase [EC:3.6.1.22]                                                           | sbj:SbBS512_E4487     |
| S1911_x_at        | -1.445719746 | 0.009563749 | Decrease_in_adherent IS629 orfB                                                                                                                                  | sfx:S1911             |
| b1886_s_at        | -1.444509564 | 0.005603204 | Decrease_in_adherent tar; methyl-accepting chemotaxis protein II ; K05875 methyl-accepting chemotaxis protein II, aspartate sensor receptor                      | ssn:SSON_1231         |
| c5509_x_at        | -1.438135039 | 0.028318503 | Decrease_in_adherent NO_KEGG_DATA                                                                                                                                | NO_KEGG_DATA          |
| S0120_s_at        | -1.434519209 | 0.032260379 | Decrease_in_adherent speE; spermidine synthase (EC:2.5.1.16); K00797 spermidine synthase [EC:2.5.1.16]                                                           | sdj:SDY_0028          |

|                  |              |              |                                                                                                                                                               |                    |
|------------------|--------------|--------------|---------------------------------------------------------------------------------------------------------------------------------------------------------------|--------------------|
| V6499_s_at       | -1.432319882 | 0.031540026  | Decrease_in_adherent fabI; enoyl-(acyl carrier protein) reductase (EC:1.3.1.10); K00208 enoyl-[acyl-carrier protein] reductase I [EC:1.3.1.9]                 | sdv:SDY_1368       |
| EC869_5327_s_at  | -1.429192817 | 0.005419602  | Decrease_in_adherent NO_KEGG_DATA                                                                                                                             | NO_KEGG_DATA       |
| V7153_s_at       | -1.421811203 | 0.015710049  | Decrease_in_adherent rnfB; dihydropteridine reductase (EC:1.5.1.34); K10679 nitroreductase / dihydropteridine reductase [EC:1.5.1.34]                         | efe:EFER_2531      |
| ECP_3250_s_at    | -1.419817615 | 0.026619956  | Decrease_in_adherent dead; ATP-dependent RNA helicase DeaD (EC:3.6.1.-); K05592 ATP-dependent RNA helicase DeaD                                               | sb:CbBS512_E3609   |
| SD1_3080_s_at    | -1.415504644 | 0.045384944  | Decrease_in_adherent proline dipeptidase; K01271 X-Pro dipeptidase [EC:3.4.13.9]                                                                              | cko:CKO_00190      |
| F4312_s_at       | -1.41264553  | 0.048691814  | Decrease_in_adherent NO_KEGG_DATA                                                                                                                             | NO_KEGG_DATA       |
| V5769_s_at       | -1.411405305 | 0.043055029  | Decrease_in_adherent ppc; phosphoenolpyruvate carboxylase (EC:4.1.1.31); K01595 phosphoenolpyruvate carboxylase [EC:4.1.1.31]                                 | sdv:SDY_3791       |
| SBO_4349_x_at    | -1.410114975 | 0.006122424  | Decrease_in_adherent insertion element IS2 transposase InsD                                                                                                   | sdv:SDY_P215       |
| b1577_s_at       | -1.409661949 | 0.027052892  | Decrease_in_adherent NO_KEGG_DATA                                                                                                                             | NO_KEGG_DATA       |
| A0582_s_at       | -1.407965839 | 0.048362303  | Decrease_in_adherent NO_KEGG_DATA                                                                                                                             | NO_KEGG_DATA       |
| F0132_s_at       | -1.406057968 | 0.010762135  | Decrease_in_adherent speE; spermidine synthase (EC:2.5.1.16); K00797 spermidine synthase [EC:2.5.1.16]                                                        | sdv:SDY_0028       |
| pCoo050_at       | -1.402997709 | 0.046907334  | Decrease_in_adherent NO_KEGG_DATA                                                                                                                             | NO_KEGG_DATA       |
| b0097_s_at       | -1.402497434 | 0.04154231   | Decrease_in_adherent yacA; SecA regulator SecM                                                                                                                | ssn:SSON_0105      |
| SD1_1428_s_at    | -1.399860136 | 0.0274441821 | Decrease_in_adherent NO_KEGG_DATA                                                                                                                             | NO_KEGG_DATA       |
| A3822_s_at       | -1.39863414  | 0.022221006  | Decrease_in_adherent ycfM; hypothetical protein; K07337 hypothetical protein                                                                                  | sdv:SDY_2045       |
| V0946_s_at       | -1.396775583 | 0.00268964   | Decrease_in_adherent NO_KEGG_DATA                                                                                                                             | NO_KEGG_DATA       |
| S85_4491_x_at    | -1.394371139 | 0.01071121   | Decrease_in_adherent insertion element protein                                                                                                                | kpn:KPN_02839      |
| A3624_s_at       | -1.394320022 | 0.015288639  | Decrease_in_adherent aspC; aromatic amino acid aminotransferase (EC:2.6.1.57); K00813 aspartate aminotransferase [EC:2.6.1.57]                                | sdv:SDY_2329       |
| EC869_8104_s_at  | -1.392464533 | 0.044905182  | Decrease_in_adherent guaA; GMP synthase (EC:6.3.5.2); K01951 GMP synthase (glutamine-hydrolysing) [EC:6.3.5.2]                                                | sbo:SBO_2531       |
| A3448_s_at       | -1.384949605 | 0.009663793  | Decrease_in_adherent uvrB; excinuclease ABC subunit B; K03702 excinuclease ABC subunit B                                                                      | sdv:SDY_0827       |
| A1640_s_at       | -1.363355164 | 0.024452233  | Decrease_in_adherent ftsX; cell division protein FtsX; K09811 cell division transport system permease protein                                                 | sdv:SDY_3613       |
| EC869_7544_s_at  | -1.361771763 | 0.020987803  | Decrease_in_adherent lipA; lipoyl synthase; K03644 lipoyl synthase [EC:2.8.1.8]                                                                               | sdv:SDY_0550       |
| V4620_s_at       | -1.357735618 | 0.02412651   | Decrease_in_adherent htrA; serine endoprotease; K04771 serine protease Do [EC:3.4.21.107]                                                                     | sdv:SDY_0178       |
| L2312_s_at       | -1.355876558 | 0.026819826  | Decrease_in_adherent NO_KEGG_DATA                                                                                                                             | NO_KEGG_DATA       |
| b0917_s_at       | -1.348228501 | 0.04892529   | Decrease_in_adherent ycaR; hypothetical protein; K09791 hypothetical protein                                                                                  | sdv:SDY_2341       |
| V3441_x_at       | -1.345224058 | 0.002192194  | Decrease_in_adherent yfeK; hypothetical protein                                                                                                               | sbo:SBO_2445       |
| A0889_s_at       | -1.341274108 | 0.013047312  | Decrease_in_adherent tas; putative aldo-keto reductase                                                                                                        | sdv:SDY_3051       |
| b2293_s_at       | -1.340796805 | 0.012024691  | Decrease_in_adherent yfbT; putative phosphatase                                                                                                               | sdv:SDY_2489       |
| V0855_s_at       | -1.339560495 | 0.028196655  | Decrease_in_adherent purA; adenylosuccinate synthetase (EC:6.3.4.4); K01939 adenylosuccinate synthase [EC:6.3.4.4]                                            | sdv:SDY_4412       |
| EC869_0399_s_at  | -1.337286192 | 0.034559368  | Decrease_in_adherent glgB; glycogen branching enzyme (EC:2.4.1.18); K00700 1,4-alpha-glucan branching enzyme [EC:2.4.1.18]                                    | sdv:SDY_3578       |
| V6412_s_at       | -1.333073368 | 0.033670147  | Decrease_in_adherent fumarate/nitrate reduction transcriptional regulator; K01420 CRP/FNR family transcriptional regulator, anaerobic regulatory protein      | cko:CKO_01409      |
| A1103_at         | -1.329903768 | 0.039656872  | Decrease_in_adherent rafR; HTH-type transcriptional regulator RafR; K02529 LacI family transcriptional regulator                                              | ecw:EcE24377A_3379 |
| pWR501_p053_x_at | -1.329178424 | 0.003089726  | Decrease_in_adherent insA; IS1 ORF1                                                                                                                           | cfi:CP0049         |
| A3267_s_at       | -1.329071299 | 0.008173239  | Decrease_in_adherent lipoyl synthase; K03644 lipoyl synthase [EC:2.8.1.8]                                                                                     | cko:CKO_02530      |
| ECP_0709_s_at    | -1.329068299 | 0.037429633  | Decrease_in_adherent pgm; phosphoglucomutase; K01835 phosphoglucomutase [EC:5.4.2.2]                                                                          | efl:LF82_1632      |
| A2172_at         | -1.32891141  | 0.049728114  | Decrease_in_adherent NO_KEGG_DATA                                                                                                                             | NO_KEGG_DATA       |
| A4461_s_at       | -1.327612825 | 0.042021335  | Decrease_in_adherent purR; DNA-binding transcriptional repressor PurR; K03604 LacI family transcriptional regulator, purine nucleotide synthesis repressor    | sb:CbBS512_E1857   |
| EC869_8432_s_at  | -1.32549676  | 0.006455924  | Decrease_in_adherent NO_KEGG_DATA                                                                                                                             | NO_KEGG_DATA       |
| A3821_s_at       | -1.323531787 | 0.017301821  | Decrease_in_adherent ycfL; hypothetical protein                                                                                                               | ssn:SSON_1124      |
| A2002_s_at       | -1.321683224 | 0.03704478   | Decrease_in_adherent hmdA; uroporphyrinogen III synthase HemD; K01719 uroporphyrinogen-III synthase [EC:4.2.1.75]                                             | ej:ECO26_4785      |
| ECs3179_s_at     | -1.318234708 | 0.04208142   | Decrease_in_adherent hypothetical protein; K09899 hypothetical protein                                                                                        | sdv:SDY_2491       |
| EC869_8932_s_at  | -1.31676988  | 0.002353625  | Decrease_in_adherent yihA; GTP-binding protein; K03978 GTP-binding protein                                                                                    | etw:ECSP_4917      |
| A1472_s_at       | -1.315739554 | 0.04725499   | Decrease_in_adherent def; peptide deformylase (EC:3.5.1.88); K01462 [EC:3.5.1.88]                                                                             | sdv:SDY_3463       |
| EC869_4317_s_at  | -1.309076623 | 0.008713328  | Decrease_in_adherent serA; D-3-phosphoglycerate dehydrogenase; K00058 D-3-phosphoglycerate dehydrogenase [EC:1.1.1.95]                                        | sdv:SDY_3169       |
| EC869_3950_s_at  | -1.306045176 | 0.028486761  | Decrease_in_adherent NO_KEGG_DATA                                                                                                                             | NO_KEGG_DATA       |
| V1193_s_at       | -1.305997908 | 0.01543759   | Decrease_in_adherent aromatic amino acid aminotransferase; K00813 aspartate aminotransferase [EC:2.6.1.1]                                                     | cko:CKO_02139      |
| b3375_s_at       | -1.303345587 | 0.019486203  | Decrease_in_adherent friR; DNA-binding transcriptional regulator FriR; K10711 GntR family transcriptional regulator, friABCD operon transcriptional repressor | sb:CbBS512_E3752   |
| A2027_at         | -1.302844963 | 0.0050975    | Decrease_in_adherent NO_KEGG_DATA                                                                                                                             | NO_KEGG_DATA       |
| SFV_2319_s_at    | -1.302061844 | 0.039596556  | Decrease_in_adherent competence damage-inducible protein A; K03742 competence/damage-inducible protein ClnA                                                   | ssn:SSON_2310      |
| V4150_s_at       | -1.296487937 | 0.030570637  | Decrease_in_adherent recO; DNA repair protein RecO; K03584 DNA repair protein RecO (recombination protein O)                                                  | sdv:SDY_2806       |
| A1497_s_at       | -1.294588957 | 0.01556704   | Decrease_in_adherent hypothetical protein                                                                                                                     | eci:UT89_C3763     |
| SDM_3114_x_at    | -1.293424472 | 0.012604231  | Decrease_in_adherent insA; IS1 ORF1                                                                                                                           | sdv:SDY_3303       |
| V3565_s_at       | -1.291393625 | 0.047829285  | Decrease_in_adherent lipoprotein; K07287 lipoprotein-34                                                                                                       | cko:CKO_00310      |
| A1555_s_at       | -1.281383769 | 0.007217384  | Decrease_in_adherent gpb; phosphoglycolate phosphatase (EC:3.1.3.18); K01091 phosphoglycolate phosphatase [EC:3.1.3.18]                                       | ecw:EcE24377A_3854 |
| S85_0656_s_at    | -1.281077913 | 0.049821738  | Decrease_in_adherent phnA; hypothetical protein; K06193 phosphonoacetate hydrolase [EC:3.11.1.2]                                                              | sdv:SDY_4109       |
| D4795_s_at       | -1.279597405 | 0.035209711  | Decrease_in_adherent ybl207; hypothetical protein                                                                                                             | ebi:B21_03841      |
| SD1_2025_s_at    | -1.277569285 | 0.045699387  | Decrease_in_adherent yafK; hypothetical protein                                                                                                               | efe:EFER_0250      |
| A1139_x_at       | -1.277050367 | 0.044148455  | Decrease_in_adherent hypothetical protein                                                                                                                     | ecw:EcE24377A_3416 |
| EC869_4608_x_at  | -1.27609242  | 0.033190442  | Decrease_in_adherent pgm; phosphoglucomutase (EC:5.4.2.2); K01835 phosphoglucomutase [EC:5.4.2.2]                                                             | sdv:SDY_0628       |
| V1937_s_at       | -1.275577024 | 0.007829111  | Decrease_in_adherent ATP-dependent RNA helicase DeaD; K05592 ATP-dependent RNA helicase DeaD                                                                  | cko:CKO_04559      |
| EC869_4323_s_at  | -1.274360887 | 0.037598331  | Decrease_in_adherent icia; chromosome replication initiation inhibitor protein; K05596 LysR family transcriptional regulator, chromosome initiation inhibitor | sdv:SDY_3165       |
| A1392_s_at       | -1.272927762 | 0.021250145  | Decrease_in_adherent Moe family protein; K02067 putative ABC transport system substrate-binding protein                                                       | sb:CbBS512_E3577   |
| b0219_s_at       | -1.259937826 | 0.048733265  | Decrease_in_adherent yafV; hypothetical protein; K01506 [EC:3.5.-.-]                                                                                          | sf:SO290           |
| EC869_1548_s_at  | -1.256998996 | 0.01204497   | Decrease_in_adherent nudF; ADP-ribose pyrophosphatase NudF (EC:3.6.1.13); K01515 ADP-ribose pyrophosphatase [EC:3.6.1.13]                                     | sdv:SDY_3206       |
| S0607_x_at       | -1.256882001 | 0.034816699  | Decrease_in_adherent IS1 orfA                                                                                                                                 | sf:SO607           |
| A1510_s_at       | -1.25398898  | 0.048128607  | Decrease_in_adherent rpsG; 30S ribosomal protein S7; K02992 small subunit ribosomal protein S7                                                                | ctu:CTu_38550      |
| V4364_s_at       | -1.253176535 | 0.015155379  | Decrease_in_adherent dinI; DNA damage-inducible protein I; K12149 DNA-damage-inducible protein I                                                              | ssn:SSON_1081      |
| V6747_s_at       | -1.252364413 | 0.044411664  | Decrease_in_adherent tas; putative aldo-keto reductase                                                                                                        | sdv:SDY_3051       |
| c5166_x_at       | -1.250429942 | 0.035622453  | Decrease_in_adherent partial transposase                                                                                                                      | ecc:c5166          |
| EC869_8287_x_at  | -1.248528128 | 0.034301641  | Decrease_in_adherent yfeK; hypothetical protein                                                                                                               | sbo:SBO_2445       |
| V2361_s_at       | -1.241351143 | 0.013460532  | Decrease_in_adherent fljY; cystine transporter subunit; K02424 cystine transport system substrate-binding protein                                             | sb:CbBS512_E1048   |
| EC869_8539_s_at  | -1.238691065 | 0.033689828  | Decrease_in_adherent purB; adenylosuccinate lyase (EC:4.3.2.2); K01756 adenylosuccinate lyase [EC:4.3.2.2]                                                    | sb:CbBS512_E1309   |
| A2736_s_at       | -1.237905996 | 0.016035431  | Decrease_in_adherent ddl; D-alanine-D-alanine ligase (EC:6.3.2.4); K01921 D-alanine-D-alanine ligase [EC:6.3.2.4]                                             | ecw:EcE24377A_0094 |
| A2277_s_at       | -1.236068368 | 0.007366908  | Decrease_in_adherent soxS; DNA-binding transcriptional regulator SoxS                                                                                         | sb:CbBS512_E4580   |



|                  |              |             |                                                                                                                                                                                                                                                                                                                                     |                     |
|------------------|--------------|-------------|-------------------------------------------------------------------------------------------------------------------------------------------------------------------------------------------------------------------------------------------------------------------------------------------------------------------------------------|---------------------|
| EC869_4779_s_at  | -1.23337565  | 0.004821461 | Decrease_in_adherent NO_KEGG_DATA                                                                                                                                                                                                                                                                                                   | NO_KEGG_DATA        |
| L0896_x_at       | -1.224407781 | 0.013767351 | Decrease_in_adherent insA; IS1 repressor protein InsA; KpLE2 phage-like element                                                                                                                                                                                                                                                     | eum:ECUMN_4863      |
| D4749_s_at       | -1.22358806  | 0.039995356 | Decrease_in_adherent relaxosome component                                                                                                                                                                                                                                                                                           | seh:SeHA_A0073      |
| A3799_s_at       | -1.221967216 | 0.041660457 | Decrease_in_adherent flgK; flagellar hook-associated protein FlgK ; K02396 flagellar hook-associated protein 1 FlgK                                                                                                                                                                                                                 | sbcs:SbBS512_E2243  |
| K3789_x_at       | -1.214367085 | 0.022861184 | Decrease_in_adherent IS1 orfA                                                                                                                                                                                                                                                                                                       | sfx:S4666           |
| SD1_2374_s_at    | -1.203872042 | 0.011095895 | Decrease_in_adherent recA; recombinase A ; K03553 recombination protein RecA                                                                                                                                                                                                                                                        | sdY:SDY_2895        |
| SBO_0253_at      | -1.203337891 | 0.028635786 | Decrease_in_adherent IS629 ORF1                                                                                                                                                                                                                                                                                                     | sbo:SBO_0253        |
| A4465_s_at       | -1.200869872 | 0.043657135 | Decrease_in_adherent ribE; riboflavin synthase subunit alpha (EC:2.5.1.9); K00793 riboflavin synthase alpha chain [EC:2.5.1.9]                                                                                                                                                                                                      | sdY:SDY_1888        |
| V7090_s_at       | -1.195816594 | 0.013066062 | Decrease_in_adherent yebT; hypothetical protein                                                                                                                                                                                                                                                                                     | eoj:ECO26_2604      |
| b4392_s_at       | -1.194458882 | 0.013133345 | Decrease_in_adherent sIt; lytic murein transglycosylase ; K08309 soluble lytic murein transglycosylase [EC:3.2.1.-]                                                                                                                                                                                                                 | sdY:SDY_4653        |
| SB5_0182_x_at    | -1.189726122 | 0.00036108  | Decrease_in_adherent insA; hypothetical protein                                                                                                                                                                                                                                                                                     | sdY:SDY_PA02        |
| V0344_x_at       | -1.180326435 | 0.023975449 | Decrease_in_adherent methI; B12-dependent methionine synthase (EC:2.1.1.13); K00548 5-methyltetrahydrofolate--homocysteine methyltransferase [EC:2.1.1.13]                                                                                                                                                                          | sbo:SBO_4040        |
| V2369_s_at       | -1.169264095 | 0.014852187 | Decrease_in_adherent flhD; flagellar capping protein; K02407 flagellar hook-associated protein 2                                                                                                                                                                                                                                    | eum:ECUMN_2216      |
| A4817_s_at       | -1.163580523 | 0.019530294 | Decrease_in_adherent IS21 family transposition helper protein                                                                                                                                                                                                                                                                       | ecw:EcE24377A_E0035 |
| A2124_s_at       | -1.158075181 | 0.009214396 | Decrease_in_adherent cpxA; two-component sensor protein (EC:2.7.3.-); K07640 two-component system, OmpR family, sensor histidine kinase CpxA [EC:2.7.3.-]; K07640 two-component system, OmpR family, sensor histidine kinase CpxA [EC:2.7.3.-]; K07640 two-component system, OmpR family, sensor histidine kinase CpxA [EC:2.7.3.-] | sbcs:SbBS512_E4391  |
| b3771_s_at       | -1.149661215 | 0.011712624 | Decrease_in_adherent dihydroxy-acid dehydratase (EC:4.2.1.9); K01687 dihydroxy-acid dehydratase [EC:4.2.1.9]                                                                                                                                                                                                                        | ppr:PBPR3A3595      |
| S0328_x_at       | -1.148882939 | 0.016678603 | Decrease_in_adherent IS629, orfA                                                                                                                                                                                                                                                                                                    | sfx:S0328           |
| EC869_7445_s_at  | -1.143759666 | 0.043894134 | Decrease_in_adherent ginS; glutamyl-tRNA synthetase; K01886 glutamyl-tRNA synthetase [EC:6.1.1.18]                                                                                                                                                                                                                                  | etw:ECSP_0727       |
| A4644_s_at       | -1.142757794 | 0.026640689 | Decrease_in_adherent htpX; heat shock protein HtpX; K03799 heat shock protein HtpX [EC:3.4.24.-]                                                                                                                                                                                                                                    | sdY:SDY_1977        |
| SB5_4819_x_at    | -1.140889607 | 0.000137195 | Decrease_in_adherent insertion element protein                                                                                                                                                                                                                                                                                      | eci:EcColC_3185     |
| SB5_1543_x_at    | -1.137608949 | 0.002731049 | Decrease_in_adherent IS1 transposase orfA                                                                                                                                                                                                                                                                                           | sbcs:SbBS512_E3449  |
| V5131_x_at       | -1.134028764 | 0.028154581 | Decrease_in_adherent glyS; glycyL-tRNA synthetase subunit beta (EC:6.1.1.14); K01879 glycyL-tRNA synthetase beta chain [EC:6.1.1.14]                                                                                                                                                                                                | sbcs:SbBS512_E3966  |
| V2336_x_at       | -1.129018627 | 0.031194561 | Decrease_in_adherent IS1 ORF                                                                                                                                                                                                                                                                                                        | ssn:SSON_0977       |
| V5164_s_at       | -1.117250049 | 0.031653576 | Decrease_in_adherent phosphoethanolamine transferase (EC:3.1.6.-); K12975 phosphoethanolamine transferase                                                                                                                                                                                                                           | sbcs:SbBS512_E3983  |
| V0008_x_at       | -1.117120822 | 0.034561338 | Decrease_in_adherent def; peptide deformylase (EC:3.5.1.88); K01462 [EC:3.5.1.88]                                                                                                                                                                                                                                                   | sdY:SDY_3463        |
| V4159_s_at       | -1.116399864 | 0.04110553  | Decrease_in_adherent GTP-binding protein LepA ; K03596 GTP-binding protein LepA                                                                                                                                                                                                                                                     | nmu:Nmul_A1751      |
| A3266_s_at       | -1.114396497 | 0.019362425 | Decrease_in_adherent tatE; twin arginine translocase protein E ; K03425 sec-independent protein translocase protein TatE                                                                                                                                                                                                            | sdY:SDY_0549        |
| J0063_at         | -1.112552261 | 0.005044151 | Decrease_in_adherent NO_KEGG_DATA                                                                                                                                                                                                                                                                                                   | NO_KEGG_DATA        |
| A2297_s_at       | -1.108261238 | 0.004501139 | Decrease_in_adherent yjcO; hypothetical protein ; K07126                                                                                                                                                                                                                                                                            | ssn:SSON_4259       |
| SDY_2387_x_at    | -1.104287838 | 0.00553387  | Decrease_in_adherent IS1 ORF1                                                                                                                                                                                                                                                                                                       | sdY:SDY_4618        |
| A1427_s_at       | -1.097574829 | 0.020849895 | Decrease_in_adherent NO_KEGG_DATA                                                                                                                                                                                                                                                                                                   | NO_KEGG_DATA        |
| A3788_s_at       | -1.096484451 | 0.008249961 | Decrease_in_adherent flgM; anti-sigma28 factor FlgM ; K02398 negative regulator of flagellin synthesis FlgM                                                                                                                                                                                                                         | sdY:SDY_2081        |
| O2ColV182_x_at   | -1.089795521 | 0.003963483 | Decrease_in_adherent IS1A; transposase IS1 orfA                                                                                                                                                                                                                                                                                     | sez:Sez_0733        |
| c5616_s_at       | -1.086935161 | 0.039856391 | Decrease_in_adherent cell wall-associated hydrolase                                                                                                                                                                                                                                                                                 | bnj:BMULJ_05090     |
| EC869_1515_s_at  | -1.085461442 | 0.015506799 | Decrease_in_adherent sufl; repressor protein for FtsI ; K04753 suppressor of ftsI                                                                                                                                                                                                                                                   | sdY:SDY_3220        |
| p166897_075_x_at | -1.084632454 | 0.004954624 | Decrease_in_adherent transposase, ORF A, insertion element IS1                                                                                                                                                                                                                                                                      | efe:pEFER_0012      |
| SDM_0733_x_at    | -1.077078154 | 0.005687363 | Decrease_in_adherent insA; IS1 ORF1                                                                                                                                                                                                                                                                                                 | ssn:SSON_4466       |
| V2525_s_at       | -1.072473036 | 0.039231204 | Decrease_in_adherent manA; mannose-6-phosphate isomerase ; K01809 mannose-6-phosphate isomerase [EC:5.3.1.8]                                                                                                                                                                                                                        | efl:LF82_1270       |
| H2119_x_at       | -1.058399766 | 0.002549268 | Decrease_in_adherent IS1 orfA                                                                                                                                                                                                                                                                                                       | sfx:S4666           |
| EC869_0326_s_at  | -1.058276506 | 0.03647233  | Decrease_in_adherent envZ; osmolarity sensor protein; K07638 two-component system, OmpR family, osmolarity sensor histidine kinase EnvZ [EC:2.7.3.-]                                                                                                                                                                                | etr:ETA_E_3278      |
| SB5_3171_x_at    | -1.056325518 | 0.00107728  | Decrease_in_adherent insertion element protein                                                                                                                                                                                                                                                                                      | kpn:KPN_02839       |
| V2220_x_at       | -1.047525191 | 0.024983652 | Decrease_in_adherent IS1A; transposase IS1 orfA                                                                                                                                                                                                                                                                                     | sez:Sez_0733        |
| V3428_s_at       | -1.032353616 | 0.033850763 | Decrease_in_adherent phosphoribulokinase/uridine kinase family protein ; K00855 phosphoribulokinase [EC:2.7.1.19]                                                                                                                                                                                                                   | sbcs:SbBS512_E3730  |
| A4248_s_at       | -1.030664943 | 0.039752138 | Decrease_in_adherent fdnH; formate dehydrogenase-N, nitrate-inducible, iron-sulfur beta subunit ; K08349 formate dehydrogenase-N, beta subunit [EC:1.1.1.1]                                                                                                                                                                         | sdY:SDY_1605        |
| V0280_s_at       | -1.029928856 | 0.002725882 | Decrease_in_adherent plsB; glycerol-3-phosphate acyltransferase (EC:2.3.1.15); K00631 glycerol-3-phosphate O-acyltransferase [EC:2.3.1.15]                                                                                                                                                                                          | sdY:SDY_4533        |
| SD1_3523_s_at    | -1.025401079 | 0.032813294 | Decrease_in_adherent rplJ; 50S ribosomal protein L10 ; K02864 large subunit ribosomal protein L10                                                                                                                                                                                                                                   | cko:CKO_03004       |
| SD1_0419_s_at    | -1.019256688 | 0.010445091 | Decrease_in_adherent ftsE; cell division protein FtsE ; K09812 cell division transport system ATP-binding protein                                                                                                                                                                                                                   | sdY:SDY_3614        |
| V0964_s_at       | -1.018585769 | 0.01925716  | Decrease_in_adherent hypothetical protein                                                                                                                                                                                                                                                                                           | sbcs:SbBS512_E3562  |
| S0495_x_at       | -1.015150052 | 0.005219949 | Decrease_in_adherent putative lipoprotein                                                                                                                                                                                                                                                                                           | sbcs:SbBS512_E0474  |
| V1934_s_at       | -1.000079059 | 0.022139127 | Decrease_in_adherent hypothetical protein                                                                                                                                                                                                                                                                                           | ecw:EcE24377A_3648  |
